# Supplementary material for: Targeting CALR with a small molecule for the treatment of gastric cancer
Source: Research Square preprint supplement (doi:10.21203/rs.3.rs-6901072/v1), 2025-06-19
Supplement: Supplementary file 1 [file 55c0f4affd5d66da9225fa1f.docx]

table 1：

The interaction between CALR and yxx1121 was detected by BIAcore

| protein | ligand | KD（M） | ka（1/Ms） | kd(1/s) | comment |
| --- | --- | --- | --- | --- | --- |
| CALR | positive control | 1.35E-10 | 64115552.9 | 0.0086556 | specific binding |
| yxx1121 | 4.96E-06 | 16853.487 | 0.083593296 | specific binding |

KD： dissociation constant

Ka: association rate constant

Kd: dissociation rate constant
