# Supplementary material for: Targeting CALR with a small molecule for the treatment of gastric cancer
Source: Research Square preprint supplement (doi:10.21203/rs.3.rs-6901072/v1), 2025-06-19
Supplement: Supplementary file 2 [file a08a204877095761b70b4c48.docx]

supplementary table 1

(CALR_OEvsCON_KEGGenrich_significant)

| KEGGID | Description | pvalue | padj | geneName | Count |
| --- | --- | --- | --- | --- | --- |
| hsa05205 | Proteoglycans in cancer | 1.16E-07 | 1.24E-05 | ITGB5/CAV1/CCND1/MYC/ITGA5/MET/WNT5A/FGFR1/ANK2/MMP2/THBS1/IGF1R/FGF2/FLNA/MAPK12/PRKCA/TGFB1/ANK1/TGFB2/CAV2/EGFR/CD44/PPP1R12C/PTCH1/PXN/TP53/SRC/MRAS | 28 |
| hsa05218 | Melanoma | 1.21E-07 | 1.24E-05 | CCND1/MET/FGFR1/GADD45A/CDKN2A/IGF1R/FGF2/PDGFB/EGFR/GADD45B/DDB2/CDK4/TP53/BAX/PDGFRB | 15 |
| hsa05200 | Pathways in cancer | 1.49E-07 | 1.24E-05 | GNG11/CCND1/MYC/MET/WNT5A/FGFR1/RAC3/GADD45A/CDKN2A/MMP2/TGFA/IGF1R/FGF2/NFKB2/JAG1/PPARG/PRKCA/TGFB1/EML4/PDGFB/DVL1/LAMC1/TGFB2/FGFR3/JUN/EGLN1/NOTCH2/EGFR/GLI2/AR/PTCH1/TGFBR2/GADD45B/CDKN2B/DDB2/JAG2/LAMC3/CDK4/BIRC3/TP53/KIF7/GNAI1/KITLG/LPAR2/LAMB3/PIM1/BMP2/BAX/PDGFRB/COL4A6 | 50 |
| hsa05206 | MicroRNAs in cancer | 4.60E-07 | 2.87E-05 | CCND1/MYC/ITGA5/MET/FSCN1/CDKN2A/IRS1/THBS1/PRKCA/PDGFB/DNMT3B/TGFB2/FGFR3/SPRY2/NOTCH2/EGFR/CD44/MARCKS/SERPINB5/TP53/DDIT4/TP63/SLC7A1/PIM1/PDGFRB | 25 |
| hsa04010 | MAPK signaling pathway | 2.23E-06 | 0.000111338 | DUSP4/MYC/MET/FGFR1/RAC3/GADD45A/TGFA/IGF1R/FGF2/NFKB2/FLNA/MAPK12/PRKCA/TGFB1/PDGFB/TGFB2/EPHA2/FGFR3/JUN/PPP3CA/EGFR/MAP3K20/MAPKAPK3/TGFBR2/GADD45B/SRF/CACNB1/BDNF/TP53/KITLG/PDGFRB/MRAS | 32 |
| hsa04151 | PI3K-Akt signaling pathway | 3.13E-06 | 0.000130341 | ITGB5/PCK2/GNG11/CCND1/ITGB4/MYC/ITGA5/MET/FGFR1/IRS1/TGFA/THBS1/IGF1R/FGF2/ITGB8/PRKCA/PDGFB/LAMC1/EPHA2/FGFR3/PRKAA2/EGFR/PKN1/LAMC3/CDK4/BDNF/TP53/DDIT4/KITLG/LPAR2/LAMB3/FOXO3/PDGFRB/COL4A6 | 34 |
| hsa04510 | Focal adhesion | 3.98E-06 | 0.000142152 | ITGB5/CAV1/CCND1/ITGB4/ITGA5/MET/RAC3/THBS1/IGF1R/FLNA/ITGB8/PRKCA/PDGFB/LAMC1/JUN/CAV2/EGFR/PPP1R12C/LAMC3/PXN/BIRC3/LAMB3/PDGFRB/COL4A6/SRC | 25 |
| hsa05214 | Glioma | 5.35E-06 | 0.000167044 | CCND1/GADD45A/CDKN2A/TGFA/IGF1R/PRKCA/PDGFB/EGFR/GADD45B/DDB2/CDK4/TP53/BAX/PDGFRB | 14 |
| hsa05223 | Non-small cell lung cancer | 1.10E-05 | 0.000306535 | CCND1/GADD45A/CDKN2A/TGFA/PRKCA/EML4/EGFR/GADD45B/DDB2/CDK4/TP53/BAX/FOXO3 | 13 |
| hsa05212 | Pancreatic cancer | 1.55E-05 | 0.000388283 | CCND1/RAC3/GADD45A/CDKN2A/TGFA/TGFB1/TGFB2/EGFR/TGFBR2/GADD45B/DDB2/CDK4/TP53/BAX | 14 |
| hsa05224 | Breast cancer | 2.34E-05 | 0.000531275 | CCND1/MYC/WNT5A/FGFR1/GADD45A/IGF1R/FGF2/NFKB2/JAG1/DVL1/JUN/NOTCH2/EGFR/GADD45B/DDB2/JAG2/CDK4/TP53/BAX | 19 |
| hsa05219 | Bladder cancer | 2.67E-05 | 0.000557122 | CCND1/MYC/CDKN2A/MMP2/THBS1/FGFR3/EGFR/CDK4/TP53/SRC | 10 |
| hsa01522 | Endocrine resistance | 4.60E-05 | 0.000884396 | CCND1/CDKN2A/MMP2/IGF1R/MAPK12/JAG1/JUN/NOTCH2/EGFR/CARM1/JAG2/CDK4/TP53/BAX/SRC | 15 |
| hsa04115 | p53 signaling pathway | 5.22E-05 | 0.000931699 | CCND1/GADD45A/CDKN2A/THBS1/SERPINE1/PIDD1/GADD45B/DDB2/SERPINB5/SESN2/CDK4/TP53/BAX | 13 |
| hsa05210 | Colorectal cancer | 7.12E-05 | 0.001142438 | CCND1/MYC/RAC3/GADD45A/TGFA/TGFB1/TGFB2/JUN/EGFR/TGFBR2/GADD45B/DDB2/TP53/BAX | 14 |
| hsa05166 | Human T-cell leukemia virus 1 infection | 7.31E-05 | 0.001142438 | CALR/CCND1/MYC/WNT5A/CDKN2A/NFKB2/TGFB1/PDGFB/DVL1/TGFB2/JUN/PPP3CA/KAT2B/TGFBR2/CDKN2B/SRF/CDK4/FOSL1/TP53/TCF3/BAX/PDGFRB/EGR1/MRAS/ATF3 | 25 |
| hsa05225 | Hepatocellular carcinoma | 0.00010539 | 0.001549855 | CCND1/MYC/MET/WNT5A/GADD45A/CDKN2A/TGFA/IGF1R/PRKCA/TGFB1/DVL1/TGFB2/EGFR/TGFBR2/GADD45B/DDB2/CDK4/TP53/SMARCA2/BAX | 20 |
| hsa05222 | Small cell lung cancer | 0.000121696 | 0.001690222 | CCND1/MYC/GADD45A/LAMC1/GADD45B/CDKN2B/DDB2/LAMC3/CDK4/BIRC3/TP53/LAMB3/BAX/COL4A6 | 14 |
| hsa05217 | Basal cell carcinoma | 0.000162227 | 0.002134568 | WNT5A/GADD45A/DVL1/GLI2/PTCH1/GADD45B/DDB2/TP53/KIF7/BMP2/BAX | 11 |
| hsa04015 | Rap1 signaling pathway | 0.000209079 | 0.002613491 | MET/FGFR1/RAC3/THBS1/IGF1R/FGF2/PARD3/MAPK12/PRKCA/PDGFB/EPHA2/FGFR3/EGFR/GNAO1/GNAI1/KITLG/LPAR2/SIPA1L2/PDGFRB/SRC/MRAS | 21 |
| hsa04933 | AGE-RAGE signaling pathway in diabetic complications | 0.000254545 | 0.003030296 | CCND1/MMP2/SERPINE1/MAPK12/PRKCA/TGFB1/TGFB2/JUN/TGFBR2/CDK4/PIM1/BAX/COL4A6/EGR1 | 14 |
| hsa05216 | Thyroid cancer | 0.000274477 | 0.003119051 | CCND1/MYC/GADD45A/PPARG/GADD45B/DDB2/TP53/BAX | 8 |
| hsa01521 | EGFR tyrosine kinase inhibitor resistance | 0.000337881 | 0.00351959 | MET/TGFA/IGF1R/FGF2/PRKCA/PDGFB/FGFR3/EGFR/BAX/FOXO3/PDGFRB/SRC | 12 |
| hsa05220 | Chronic myeloid leukemia | 0.000337881 | 0.00351959 | CCND1/MYC/GADD45A/CDKN2A/TGFB1/TGFB2/TGFBR2/GADD45B/DDB2/CDK4/TP53/BAX | 12 |
| hsa04218 | Cellular senescence | 0.000373347 | 0.003733475 | CCND1/MYC/HIPK2/GADD45A/CDKN2A/SERPINE1/MAPK12/TGFB1/TGFB2/E2F4/PPP3CA/TGFBR2/GADD45B/CDKN2B/CDK4/TP53/FOXO3/MRAS | 18 |
| hsa04068 | FoxO signaling pathway | 0.00040433 | 0.003887787 | PCK2/PLK2/CCND1/GADD45A/IRS1/IGF1R/MAPK12/TGFB1/TGFB2/PRKAA2/EGFR/TGFBR2/GADD45B/CDKN2B/PRMT1/FOXO3 | 16 |
| hsa04360 | Axon guidance | 0.000468348 | 0.004336558 | ENAH/SEMA3C/MET/WNT5A/RAC3/SRGAP2/PLXNA1/PARD3/PRKCA/PLXNA2/EPHA2/PPP3CA/EPHA7/PTCH1/GNAI1/EPHB4/PLXNA3/NTN4/SRC | 19 |
| hsa05226 | Gastric cancer | 0.00070504 | 0.006294999 | CCND1/MYC/MET/WNT5A/GADD45A/FGF2/TGFB1/DVL1/TGFB2/EGFR/TGFBR2/GADD45B/CDKN2B/DDB2/TP53/BAX | 16 |
| hsa05203 | Viral carcinogenesis | 0.001543299 | 0.013304304 | CCND1/CDKN2A/NFKB2/JUN/HIST2H2BE/KAT2B/CDKN2B/SRF/HIST1H2BO/SCIN/PXN/CDK4/HIST3H2BB/TP53/HIST1H2BH/BAX/UBR4/SRC/HIST2H2BF | 19 |
| hsa04350 | TGF-beta signaling pathway | 0.001765982 | 0.01471652 | MYC/FST/SMAD7/THBS1/TGFB1/TGFB2/E2F4/TGFBR2/CDKN2B/NBL1/BMP2 | 11 |
| hsa05213 | Endometrial cancer | 0.001922002 | 0.015500016 | CCND1/MYC/GADD45A/EGFR/GADD45B/DDB2/TP53/BAX/FOXO3 | 9 |
| hsa04512 | ECM-receptor interaction | 0.002240196 | 0.017501534 | ITGB5/ITGB4/ITGA5/THBS1/ITGB8/LAMC1/CD44/LAMC3/LAMB3/COL4A6 | 10 |
| hsa04810 | Regulation of actin cytoskeleton | 0.00295987 | 0.022423254 | ENAH/ITGB5/ITGB4/ITGA5/FGFR1/RAC3/GIT1/FGF2/ITGB8/PDGFB/FGFR3/EGFR/PPP1R12C/SCIN/PXN/LPAR2/PDGFRB/SRC/MRAS | 19 |
| hsa04520 | Adherens junction | 0.003469896 | 0.025513944 | MET/FGFR1/RAC3/IGF1R/PARD3/EGFR/TGFBR2/PTPRF/SSX2IP/SRC | 10 |
| hsa05169 | Epstein-Barr virus infection | 0.00446036 | 0.031859717 | CALR/CCND1/MYC/GADD45A/NFKB2/MAPK12/JUN/CD44/ADRM1/GADD45B/DDB2/CDK4/TP53/BAX/TNFAIP3/SAP30 | 16 |
| hsa05144 | Malaria | 0.004652076 | 0.032306084 | IL18/MET/THBS1/TGFB1/TGFB2/LRP1 | 6 |
| hsa05202 | Transcriptional misregulation in cancer | 0.005082826 | 0.034343418 | MYC/MET/GADD45A/ETV5/ETV1/IGF1R/PPARG/ETV4/NUPR1/TGFBR2/GADD45B/DDB2/BIRC3/TP53/TCF3/BAX | 16 |
| hsa05410 | Hypertrophic cardiomyopathy (HCM) | 0.006776122 | 0.044579748 | ITGB5/ITGB4/ITGA5/DMD/ITGB8/TGFB1/TGFB2/PRKAA2/CACNB1 | 9 |
