# Supplementary material for: Targeting CALR with a small molecule for the treatment of gastric cancer
Source: Research Square preprint supplement (doi:10.21203/rs.3.rs-6901072/v1), 2025-06-19
Supplement: Supplementary file 3 [file b227d7c050013acf58370e1b.docx]

supplementary table2

(changed apoptosis genes)

| Gene name | N1 | N2 | N3 | O1 | O2 | O3 |
| --- | --- | --- | --- | --- | --- | --- |
| CALR | 225.1192729 | 238.3105367 | 239.0666422 | 1983.248311 | 2158.705032 | 2234.430916 |
| MYC | 138.7864948 | 131.8598924 | 135.7705536 | 160.2529862 | 185.7985267 | 182.8249661 |
| CDK4 | 43.27005726 | 44.90368082 | 43.294794 | 51.66949594 | 49.74632239 | 49.72707887 |
| CCND1 | 23.54862511 | 22.24808827 | 22.93084892 | 29.24643659 | 32.16325898 | 32.13743025 |
| CASP1 | 5.635843682 | 4.962013769 | 4.78347154 | 2.97797101 | 2.836607046 | 3.187979574 |
| CASP9 | 26.97702625 | 26.62574148 | 27.50929398 | 7.922538765 | 20.65503765 | 21.25581902 |
| CASP7 | 6.746003739 | 6.801455555 | 7.520951427 | 6.55344715 | 5.681110785 | 5.634847095 |
| CASP2 | 10.18974566 | 10.26908695 | 10.34513629 | 9.669453323 | 9.638358564 | 9.936699754 |
| CASP4 | 9.350805136 | 9.870229833 | 9.460440802 | 7.461434372 | 8.630986978 | 8.283012844 |
| CASP3 | 12.51864851 | 11.53724115 | 13.27381152 | 11.79398261 | 10.20908756 | 10.4456469 |
