# Supplementary material for: Targeting CALR with a small molecule for the treatment of gastric cancer
Source: Research Square preprint supplement (doi:10.21203/rs.3.rs-6901072/v1), 2025-06-19
Supplement: Supplementary file 4 [file b24ee009b52969e71b0c6bed.docx]

supplementary table 3

(SPR technology is used to detect the binding of CALR protein to yxx1121)

| Positive antibody ab2907 | 0.0078125nM | 0.015625nM | 0.03125nM | 0.0625nM | 0.125nM | 0.25nM | 0.5nM | 1nM |
| --- | --- | --- | --- | --- | --- | --- | --- | --- |
| -56.14 | 0.004443 | 0.007523 | 0.008994 | 0.012964 | 0.015683 | 0.019791 | 0.022792 | 0.026328 |
| -56.04 | 0.004415 | 0.007330 | 0.009013 | 0.012752 | 0.015588 | 0.019557 | 0.022518 | 0.026069 |
| -55.94 | 0.004379 | 0.007365 | 0.008794 | 0.012575 | 0.015532 | 0.019525 | 0.022565 | 0.026010 |
| -55.84 | 0.004553 | 0.007366 | 0.009027 | 0.012809 | 0.015434 | 0.019453 | 0.022403 | 0.025853 |
| -55.74 | 0.004511 | 0.007171 | 0.009130 | 0.012449 | 0.015449 | 0.019379 | 0.022424 | 0.025891 |
| -55.64 | 0.004485 | 0.007272 | 0.008918 | 0.012361 | 0.015424 | 0.019241 | 0.022341 | 0.025625 |
| -55.54 | 0.004364 | 0.007088 | 0.008775 | 0.012793 | 0.015402 | 0.019225 | 0.022344 | 0.025784 |
| -55.44 | 0.004462 | 0.007315 | 0.008973 | 0.012526 | 0.015248 | 0.019272 | 0.022181 | 0.025659 |
| -55.34 | 0.004429 | 0.007071 | 0.008802 | 0.012591 | 0.015228 | 0.019103 | 0.022152 | 0.025389 |
| -55.24 | 0.004436 | 0.007142 | 0.008620 | 0.012239 | 0.015284 | 0.019067 | 0.022083 | 0.025511 |
| -55.14 | 0.004448 | 0.007186 | 0.008658 | 0.012430 | 0.015241 | 0.018988 | 0.021957 | 0.025372 |
| -55.04 | 0.004269 | 0.007269 | 0.008564 | 0.012200 | 0.015201 | 0.018944 | 0.021982 | 0.025399 |
| -54.94 | 0.004265 | 0.007141 | 0.008745 | 0.012442 | 0.015200 | 0.019078 | 0.021922 | 0.025321 |
| -54.84 | 0.004369 | 0.007094 | 0.008561 | 0.012494 | 0.015088 | 0.018951 | 0.021839 | 0.025209 |
| -54.74 | 0.004265 | 0.007100 | 0.008715 | 0.012081 | 0.015007 | 0.018909 | 0.021842 | 0.025153 |
| -54.64 | 0.004211 | 0.007139 | 0.008473 | 0.012089 | 0.014971 | 0.018833 | 0.021633 | 0.024913 |
| -54.54 | 0.004288 | 0.006850 | 0.008610 | 0.012184 | 0.014928 | 0.018753 | 0.021551 | 0.024978 |
| -54.44 | 0.004210 | 0.007054 | 0.008607 | 0.012165 | 0.014819 | 0.018733 | 0.021533 | 0.024879 |
| -54.34 | 0.004304 | 0.006870 | 0.008749 | 0.011962 | 0.014771 | 0.018630 | 0.021528 | 0.024835 |
| -54.24 | 0.004273 | 0.006874 | 0.008501 | 0.011903 | 0.014782 | 0.018452 | 0.021441 | 0.024694 |
| -54.14 | 0.004149 | 0.006937 | 0.008651 | 0.012344 | 0.014758 | 0.018513 | 0.021238 | 0.024558 |
| -54.04 | 0.004132 | 0.006853 | 0.008518 | 0.012321 | 0.014639 | 0.018470 | 0.021346 | 0.024479 |
| -53.94 | 0.004246 | 0.006775 | 0.008377 | 0.012027 | 0.014635 | 0.018324 | 0.021170 | 0.024523 |
| -53.84 | 0.004293 | 0.006821 | 0.008340 | 0.012118 | 0.014512 | 0.018298 | 0.021170 | 0.024374 |
| -53.74 | 0.004257 | 0.006806 | 0.008523 | 0.011716 | 0.014467 | 0.018150 | 0.021085 | 0.024195 |
| -53.64 | 0.004130 | 0.006802 | 0.008150 | 0.011872 | 0.014467 | 0.018127 | 0.021003 | 0.024173 |
| -53.54 | 0.004087 | 0.006881 | 0.008216 | 0.011629 | 0.014385 | 0.018170 | 0.020954 | 0.024130 |
| -53.44 | 0.004144 | 0.006657 | 0.008321 | 0.011719 | 0.014365 | 0.017970 | 0.020814 | 0.024111 |
| -53.34 | 0.004160 | 0.006881 | 0.008386 | 0.011822 | 0.014283 | 0.017985 | 0.020822 | 0.023843 |
| -53.24 | 0.004011 | 0.006482 | 0.007989 | 0.011356 | 0.014269 | 0.017967 | 0.020651 | 0.023823 |
| -53.14 | 0.003990 | 0.006477 | 0.008004 | 0.011357 | 0.014327 | 0.017811 | 0.020606 | 0.023746 |
| -53.04 | 0.003960 | 0.006447 | 0.007986 | 0.011339 | 0.014219 | 0.017884 | 0.020636 | 0.023664 |
| -52.94 | 0.003979 | 0.006446 | 0.007948 | 0.011304 | 0.014205 | 0.017811 | 0.020474 | 0.023583 |
| -52.84 | 0.003958 | 0.006423 | 0.007979 | 0.011293 | 0.014169 | 0.017811 | 0.020598 | 0.023588 |
| -52.74 | 0.003947 | 0.006438 | 0.007911 | 0.011257 | 0.014090 | 0.017682 | 0.020514 | 0.023618 |
| -52.64 | 0.003946 | 0.006464 | 0.007950 | 0.011271 | 0.014096 | 0.017791 | 0.020540 | 0.023544 |
| -52.54 | 0.003939 | 0.006421 | 0.007947 | 0.011232 | 0.014129 | 0.017800 | 0.020557 | 0.023576 |
| -52.44 | 0.003952 | 0.006431 | 0.007919 | 0.011237 | 0.014174 | 0.017704 | 0.020414 | 0.023633 |
| -52.34 | 0.003942 | 0.006445 | 0.007910 | 0.011217 | 0.014104 | 0.017613 | 0.020430 | 0.023472 |
| -52.24 | 0.003927 | 0.006402 | 0.007939 | 0.011195 | 0.014119 | 0.017688 | 0.020381 | 0.023474 |
| -52.14 | 0.003915 | 0.006410 | 0.007870 | 0.011216 | 0.013990 | 0.017657 | 0.020424 | 0.023491 |
| -52.04 | 0.003910 | 0.006387 | 0.007825 | 0.011124 | 0.014033 | 0.017570 | 0.020277 | 0.023295 |
| -51.94 | 0.003899 | 0.006350 | 0.007828 | 0.011105 | 0.013898 | 0.017463 | 0.020256 | 0.023247 |
| -51.84 | 0.003900 | 0.006310 | 0.007758 | 0.011113 | 0.013868 | 0.017415 | 0.020125 | 0.023142 |
| -51.74 | 0.003861 | 0.006272 | 0.007741 | 0.010983 | 0.013846 | 0.017359 | 0.020023 | 0.023176 |
| -51.64 | 0.003845 | 0.006255 | 0.007720 | 0.010992 | 0.013799 | 0.017251 | 0.020048 | 0.023084 |
| -51.54 | 0.003837 | 0.006235 | 0.007717 | 0.010929 | 0.013752 | 0.017168 | 0.019886 | 0.022869 |
| -51.44 | 0.003835 | 0.006229 | 0.007675 | 0.010871 | 0.013720 | 0.017170 | 0.019840 | 0.022883 |
| -51.34 | 0.003821 | 0.006220 | 0.007623 | 0.010882 | 0.013594 | 0.017076 | 0.019789 | 0.022703 |
| -51.24 | 0.003814 | 0.006194 | 0.007620 | 0.010813 | 0.013633 | 0.017063 | 0.019669 | 0.022631 |
| -51.14 | 0.003766 | 0.006128 | 0.007567 | 0.010791 | 0.013579 | 0.016948 | 0.019599 | 0.022508 |
| -51.04 | 0.003770 | 0.006141 | 0.007554 | 0.010761 | 0.013425 | 0.016840 | 0.019472 | 0.022501 |
| -50.94 | 0.003759 | 0.006089 | 0.007520 | 0.010754 | 0.013489 | 0.016813 | 0.019379 | 0.022520 |
| -50.84 | 0.003730 | 0.006062 | 0.007518 | 0.010623 | 0.013324 | 0.016753 | 0.019393 | 0.022398 |
| -50.74 | 0.003742 | 0.006064 | 0.007448 | 0.010644 | 0.013380 | 0.016670 | 0.019401 | 0.022295 |
| -50.64 | 0.003715 | 0.006049 | 0.007469 | 0.010569 | 0.013294 | 0.016634 | 0.019329 | 0.022200 |
| -50.54 | 0.003694 | 0.006021 | 0.007399 | 0.010565 | 0.013193 | 0.016619 | 0.019248 | 0.022077 |
| -50.44 | 0.003680 | 0.006017 | 0.007377 | 0.010563 | 0.013226 | 0.016622 | 0.019184 | 0.022099 |
| -50.34 | 0.003705 | 0.006024 | 0.007376 | 0.010507 | 0.013159 | 0.016572 | 0.019174 | 0.022011 |
| -50.24 | 0.003675 | 0.005971 | 0.007343 | 0.010423 | 0.013086 | 0.016442 | 0.019051 | 0.021943 |
| -50.14 | 0.003661 | 0.005942 | 0.007371 | 0.010410 | 0.013093 | 0.016365 | 0.019005 | 0.021802 |
| -50.04 | 0.003657 | 0.005925 | 0.007297 | 0.010388 | 0.013046 | 0.016269 | 0.018895 | 0.021797 |
| -49.94 | 0.003631 | 0.005892 | 0.007257 | 0.010322 | 0.012987 | 0.016319 | 0.018861 | 0.021787 |
| -49.84 | 0.003626 | 0.005920 | 0.007302 | 0.010308 | 0.012981 | 0.016323 | 0.018861 | 0.021565 |
| -49.74 | 0.003626 | 0.005907 | 0.007249 | 0.010323 | 0.012973 | 0.016207 | 0.018759 | 0.021590 |
| -49.64 | 0.003605 | 0.005878 | 0.007200 | 0.010283 | 0.012883 | 0.016129 | 0.018676 | 0.021455 |
| -49.54 | 0.003605 | 0.005845 | 0.007181 | 0.010199 | 0.012881 | 0.016166 | 0.018669 | 0.021382 |
| -49.44 | 0.003578 | 0.005840 | 0.007164 | 0.010180 | 0.012829 | 0.016067 | 0.018549 | 0.021381 |
| -49.34 | 0.003561 | 0.005789 | 0.007191 | 0.010227 | 0.012728 | 0.015976 | 0.018537 | 0.021409 |
| -49.24 | 0.003550 | 0.005810 | 0.007154 | 0.010161 | 0.012759 | 0.016018 | 0.018422 | 0.021264 |
| -49.14 | 0.003541 | 0.005785 | 0.007130 | 0.010077 | 0.012708 | 0.015879 | 0.018454 | 0.021216 |
| -49.04 | 0.003542 | 0.005766 | 0.007056 | 0.010096 | 0.012564 | 0.015874 | 0.018351 | 0.021040 |
| -48.94 | 0.003534 | 0.005757 | 0.007038 | 0.010067 | 0.012548 | 0.015785 | 0.018230 | 0.021118 |
| -48.84 | 0.003498 | 0.005725 | 0.007053 | 0.009956 | 0.012521 | 0.015758 | 0.018199 | 0.020871 |
| -48.74 | 0.003500 | 0.005683 | 0.007032 | 0.009993 | 0.012469 | 0.015663 | 0.018162 | 0.020839 |
| -48.64 | 0.003492 | 0.005681 | 0.006972 | 0.009969 | 0.012458 | 0.015622 | 0.018103 | 0.020821 |
| -48.54 | 0.003474 | 0.005666 | 0.006949 | 0.009857 | 0.012437 | 0.015623 | 0.018005 | 0.020811 |
| -48.44 | 0.003462 | 0.005634 | 0.006947 | 0.009858 | 0.012338 | 0.015484 | 0.017881 | 0.020628 |
| -48.34 | 0.003432 | 0.005578 | 0.006884 | 0.009838 | 0.012278 | 0.015437 | 0.017790 | 0.020623 |
| -48.24 | 0.003414 | 0.005564 | 0.006841 | 0.009742 | 0.012245 | 0.015396 | 0.017762 | 0.020522 |
| -48.14 | 0.003428 | 0.005587 | 0.006836 | 0.009773 | 0.012234 | 0.015309 | 0.017685 | 0.020500 |
| -48.04 | 0.003389 | 0.005526 | 0.006795 | 0.009724 | 0.012117 | 0.015223 | 0.017674 | 0.020360 |
| -47.94 | 0.003367 | 0.005486 | 0.006761 | 0.009598 | 0.012059 | 0.015154 | 0.017437 | 0.020250 |
| -47.84 | 0.003369 | 0.005473 | 0.006759 | 0.009611 | 0.012006 | 0.015147 | 0.017397 | 0.020083 |
| -47.74 | 0.003350 | 0.005445 | 0.006742 | 0.009572 | 0.012009 | 0.015079 | 0.017357 | 0.019947 |
| -47.64 | 0.003341 | 0.005416 | 0.006713 | 0.009550 | 0.011891 | 0.015038 | 0.017329 | 0.019977 |
| -47.54 | 0.003333 | 0.005422 | 0.006652 | 0.009467 | 0.011846 | 0.014960 | 0.017186 | 0.019908 |
| -47.44 | 0.003303 | 0.005397 | 0.006651 | 0.009496 | 0.011908 | 0.014909 | 0.017111 | 0.019868 |
| -47.34 | 0.003298 | 0.005388 | 0.006629 | 0.009394 | 0.011789 | 0.014867 | 0.017107 | 0.019691 |
| -47.24 | 0.003302 | 0.005345 | 0.006606 | 0.009399 | 0.011776 | 0.014773 | 0.017024 | 0.019699 |
| -47.14 | 0.003271 | 0.005341 | 0.006532 | 0.009305 | 0.011733 | 0.014723 | 0.016971 | 0.019483 |
| -47.04 | 0.003252 | 0.005287 | 0.006524 | 0.009324 | 0.011619 | 0.014622 | 0.016857 | 0.019371 |
| -46.94 | 0.003234 | 0.005286 | 0.006496 | 0.009220 | 0.011539 | 0.014562 | 0.016718 | 0.019378 |
| -46.84 | 0.003242 | 0.005255 | 0.006483 | 0.009207 | 0.011532 | 0.014479 | 0.016749 | 0.019344 |
| -46.74 | 0.003294 | 0.005347 | 0.006625 | 0.009421 | 0.011773 | 0.014762 | 0.017132 | 0.019675 |
| -46.64 | 0.003281 | 0.005353 | 0.006579 | 0.009385 | 0.011703 | 0.014639 | 0.016937 | 0.019659 |
| -46.54 | 0.003292 | 0.005393 | 0.006639 | 0.009426 | 0.011784 | 0.014763 | 0.017057 | 0.019811 |
| -46.44 | 0.003334 | 0.005409 | 0.006696 | 0.009552 | 0.011903 | 0.014928 | 0.017294 | 0.019900 |
| -46.34 | 0.003401 | 0.005538 | 0.006833 | 0.009747 | 0.012147 | 0.015240 | 0.017583 | 0.020317 |
| -46.24 | 0.003204 | 0.005197 | 0.006455 | 0.009130 | 0.011514 | 0.014384 | 0.016616 | 0.019204 |
| -46.14 | 0.003201 | 0.005226 | 0.006391 | 0.009103 | 0.011468 | 0.014308 | 0.016576 | 0.019120 |
| -46.04 | 0.003244 | 0.005255 | 0.006461 | 0.009242 | 0.011554 | 0.014486 | 0.016764 | 0.019342 |
| -45.94 | 0.003218 | 0.005225 | 0.006460 | 0.009174 | 0.011512 | 0.014417 | 0.016708 | 0.019224 |
| -45.84 | 0.003241 | 0.005255 | 0.006496 | 0.009223 | 0.011545 | 0.014524 | 0.016809 | 0.019383 |
| -45.74 | 0.003245 | 0.005281 | 0.006544 | 0.009231 | 0.011583 | 0.014623 | 0.016883 | 0.019353 |
| -45.64 | 0.003278 | 0.005320 | 0.006555 | 0.009346 | 0.011638 | 0.014587 | 0.016870 | 0.019445 |
| -45.54 | 0.003236 | 0.005249 | 0.006444 | 0.009228 | 0.011578 | 0.014438 | 0.016762 | 0.019272 |
| -45.44 | 0.003191 | 0.005191 | 0.006410 | 0.009078 | 0.011389 | 0.014322 | 0.016508 | 0.019071 |
| -45.34 | 0.003169 | 0.005150 | 0.006365 | 0.009053 | 0.011290 | 0.014245 | 0.016404 | 0.018898 |
| -45.24 | 0.002969 | 0.004866 | 0.005948 | 0.008501 | 0.010599 | 0.013328 | 0.015482 | 0.017754 |
| -45.14 | 0.003021 | 0.004920 | 0.006033 | 0.008596 | 0.010762 | 0.013538 | 0.015641 | 0.017932 |
| -45.04 | 0.003119 | 0.005062 | 0.006264 | 0.008894 | 0.011157 | 0.013968 | 0.016143 | 0.018533 |
| -44.94 | 0.003173 | 0.005166 | 0.006393 | 0.009085 | 0.011330 | 0.014282 | 0.016523 | 0.019043 |
| -44.84 | 0.003251 | 0.005301 | 0.006510 | 0.009304 | 0.011589 | 0.014542 | 0.016795 | 0.019408 |
| -44.74 | 0.003168 | 0.005157 | 0.006317 | 0.009028 | 0.011277 | 0.014193 | 0.016410 | 0.018821 |
| -44.64 | 0.003053 | 0.004971 | 0.006110 | 0.008705 | 0.010910 | 0.013757 | 0.015901 | 0.018330 |
| -44.54 | 0.002996 | 0.004858 | 0.006011 | 0.008562 | 0.010752 | 0.013455 | 0.015499 | 0.017858 |
| -44.44 | 0.002989 | 0.004877 | 0.006022 | 0.008573 | 0.010712 | 0.013435 | 0.015481 | 0.017964 |
| -44.34 | 0.003052 | 0.004982 | 0.006104 | 0.008672 | 0.010919 | 0.013629 | 0.015790 | 0.018154 |
| -44.24 | 0.003049 | 0.004969 | 0.006091 | 0.008650 | 0.010874 | 0.013689 | 0.015781 | 0.018129 |
| -44.14 | 0.003044 | 0.004934 | 0.006099 | 0.008616 | 0.010851 | 0.013655 | 0.015681 | 0.018080 |
| -44.04 | 0.003029 | 0.004902 | 0.006070 | 0.008607 | 0.010792 | 0.013521 | 0.015595 | 0.017956 |
| -43.94 | 0.002986 | 0.004857 | 0.006006 | 0.008538 | 0.010695 | 0.013383 | 0.015518 | 0.017836 |
| -43.84 | 0.002969 | 0.004835 | 0.005994 | 0.008498 | 0.010630 | 0.013395 | 0.015449 | 0.017756 |
| -43.74 | 0.002972 | 0.004853 | 0.005963 | 0.008452 | 0.010672 | 0.013284 | 0.015458 | 0.017744 |
| -43.64 | 0.002963 | 0.004813 | 0.005963 | 0.008501 | 0.010641 | 0.013266 | 0.015441 | 0.017789 |
| -43.54 | 0.002958 | 0.004780 | 0.005886 | 0.008443 | 0.010589 | 0.013219 | 0.015315 | 0.017653 |
| -43.44 | 0.002918 | 0.004757 | 0.005852 | 0.008306 | 0.010429 | 0.013005 | 0.015151 | 0.017442 |
| -43.34 | 0.002911 | 0.004763 | 0.005875 | 0.008290 | 0.010400 | 0.013051 | 0.015079 | 0.017366 |
| -43.24 | 0.002594 | 0.004233 | 0.005195 | 0.007378 | 0.009307 | 0.011591 | 0.013409 | 0.015547 |
| -43.14 | 0.002697 | 0.004370 | 0.005390 | 0.007636 | 0.009593 | 0.012065 | 0.013874 | 0.016012 |
| -43.04 | 0.002984 | 0.004856 | 0.005962 | 0.008478 | 0.010680 | 0.013408 | 0.015403 | 0.017753 |
| -42.94 | 0.003289 | 0.005358 | 0.006576 | 0.009314 | 0.011770 | 0.014682 | 0.016957 | 0.019514 |
| -42.84 | 0.003282 | 0.005293 | 0.006536 | 0.009316 | 0.011713 | 0.014693 | 0.016993 | 0.019587 |
| -42.74 | 0.002975 | 0.004859 | 0.005976 | 0.008501 | 0.010621 | 0.013369 | 0.015482 | 0.017790 |
| -42.64 | 0.002820 | 0.004604 | 0.005673 | 0.008040 | 0.010081 | 0.012667 | 0.014620 | 0.016854 |
| -42.54 | 0.002703 | 0.004406 | 0.005396 | 0.007693 | 0.009626 | 0.012066 | 0.013996 | 0.016105 |
| -42.44 | 0.002724 | 0.004437 | 0.005482 | 0.007778 | 0.009750 | 0.012303 | 0.014163 | 0.016338 |
| -42.34 | 0.002701 | 0.004384 | 0.005401 | 0.007707 | 0.009674 | 0.012064 | 0.013992 | 0.016131 |
| -42.24 | 0.002561 | 0.004160 | 0.005137 | 0.007326 | 0.009152 | 0.011558 | 0.013266 | 0.015375 |
| -42.14 | 0.002658 | 0.004320 | 0.005296 | 0.007566 | 0.009506 | 0.011863 | 0.013742 | 0.015789 |
| -42.04 | 0.002719 | 0.004417 | 0.005406 | 0.007730 | 0.009721 | 0.012101 | 0.014041 | 0.016132 |
| -41.94 | 0.002699 | 0.004405 | 0.005420 | 0.007731 | 0.009645 | 0.012175 | 0.014057 | 0.016120 |
| -41.84 | 0.002684 | 0.004368 | 0.005385 | 0.007701 | 0.009627 | 0.012133 | 0.013953 | 0.016058 |
| -41.74 | 0.002707 | 0.004418 | 0.005413 | 0.007760 | 0.009705 | 0.012178 | 0.014048 | 0.016149 |
| -41.64 | 0.002667 | 0.004363 | 0.005341 | 0.007596 | 0.009580 | 0.011960 | 0.013875 | 0.015940 |
| -41.54 | 0.002695 | 0.004390 | 0.005416 | 0.007719 | 0.009667 | 0.012106 | 0.013981 | 0.016134 |
| -41.44 | 0.002764 | 0.004489 | 0.005544 | 0.007860 | 0.009868 | 0.012302 | 0.014309 | 0.016405 |
| -41.34 | 0.002752 | 0.004447 | 0.005503 | 0.007807 | 0.009777 | 0.012297 | 0.014257 | 0.016315 |
| -41.24 | 0.002687 | 0.004398 | 0.005401 | 0.007710 | 0.009635 | 0.012031 | 0.013894 | 0.016131 |
| -41.14 | 0.002648 | 0.004316 | 0.005302 | 0.007547 | 0.009448 | 0.011910 | 0.013743 | 0.015852 |
| -41.04 | 0.002641 | 0.004295 | 0.005325 | 0.007515 | 0.009429 | 0.011853 | 0.013718 | 0.015760 |
| -40.94 | 0.002638 | 0.004273 | 0.005297 | 0.007474 | 0.009397 | 0.011800 | 0.013641 | 0.015666 |
| -40.84 | 0.002629 | 0.004286 | 0.005272 | 0.007509 | 0.009363 | 0.011781 | 0.013666 | 0.015752 |
| -40.74 | 0.002614 | 0.004271 | 0.005263 | 0.007454 | 0.009421 | 0.011815 | 0.013630 | 0.015699 |
| -40.64 | 0.002643 | 0.004304 | 0.005268 | 0.007533 | 0.009440 | 0.011828 | 0.013609 | 0.015694 |
| -40.54 | 0.002649 | 0.004294 | 0.005313 | 0.007552 | 0.009440 | 0.011841 | 0.013661 | 0.015736 |
| -40.44 | 0.002631 | 0.004279 | 0.005278 | 0.007523 | 0.009391 | 0.011845 | 0.013672 | 0.015658 |
| -40.34 | 0.002626 | 0.004267 | 0.005233 | 0.007500 | 0.009364 | 0.011708 | 0.013566 | 0.015719 |
| -40.24 | 0.002629 | 0.004277 | 0.005272 | 0.007508 | 0.009417 | 0.011744 | 0.013559 | 0.015704 |
| -40.14 | 0.002620 | 0.004267 | 0.005253 | 0.007477 | 0.009359 | 0.011746 | 0.013556 | 0.015639 |
| -40.04 | 0.002641 | 0.004291 | 0.005282 | 0.007468 | 0.009384 | 0.011786 | 0.013687 | 0.015724 |
| -39.94 | 0.002640 | 0.004292 | 0.005270 | 0.007468 | 0.009397 | 0.011806 | 0.013566 | 0.015691 |
| -39.84 | 0.002601 | 0.004241 | 0.005248 | 0.007418 | 0.009361 | 0.011723 | 0.013510 | 0.015621 |
| -39.74 | 0.002607 | 0.004230 | 0.005242 | 0.007455 | 0.009332 | 0.011656 | 0.013531 | 0.015509 |
| -39.64 | 0.002603 | 0.004221 | 0.005179 | 0.007418 | 0.009313 | 0.011617 | 0.013422 | 0.015497 |
| -39.54 | 0.002579 | 0.004187 | 0.005200 | 0.007394 | 0.009208 | 0.011624 | 0.013393 | 0.015423 |
| -39.44 | 0.002570 | 0.004174 | 0.005166 | 0.007354 | 0.009223 | 0.011532 | 0.013353 | 0.015420 |
| -39.34 | 0.002559 | 0.004158 | 0.005117 | 0.007276 | 0.009147 | 0.011451 | 0.013303 | 0.015237 |
| -39.24 | 0.002556 | 0.004174 | 0.005130 | 0.007285 | 0.009143 | 0.011438 | 0.013238 | 0.015317 |
| -39.14 | 0.002550 | 0.004145 | 0.005110 | 0.007231 | 0.009112 | 0.011407 | 0.013127 | 0.015231 |
| -39.04 | 0.002526 | 0.004115 | 0.005064 | 0.007188 | 0.009034 | 0.011357 | 0.013053 | 0.015165 |
| -38.94 | 0.002524 | 0.004099 | 0.005047 | 0.007202 | 0.009026 | 0.011293 | 0.013006 | 0.015097 |
| -38.84 | 0.002523 | 0.004098 | 0.005053 | 0.007165 | 0.008973 | 0.011292 | 0.013005 | 0.015075 |
| -38.74 | 0.002496 | 0.004064 | 0.005029 | 0.007165 | 0.008982 | 0.011190 | 0.012987 | 0.014913 |
| -38.64 | 0.002487 | 0.004042 | 0.005011 | 0.007092 | 0.008917 | 0.011227 | 0.012874 | 0.014918 |
| -38.54 | 0.002491 | 0.004030 | 0.004992 | 0.007061 | 0.008888 | 0.011105 | 0.012888 | 0.014755 |
| -38.44 | 0.002477 | 0.004016 | 0.004952 | 0.007051 | 0.008858 | 0.011035 | 0.012764 | 0.014704 |
| -38.34 | 0.002460 | 0.003999 | 0.004909 | 0.006979 | 0.008776 | 0.011040 | 0.012662 | 0.014660 |
| -38.24 | 0.002445 | 0.003963 | 0.004909 | 0.006967 | 0.008708 | 0.011008 | 0.012641 | 0.014548 |
| -38.14 | 0.002424 | 0.003955 | 0.004882 | 0.006901 | 0.008693 | 0.010922 | 0.012544 | 0.014518 |
| -38.04 | 0.002401 | 0.003940 | 0.004846 | 0.006863 | 0.008599 | 0.010822 | 0.012464 | 0.014362 |
| -37.94 | 0.002390 | 0.003893 | 0.004812 | 0.006833 | 0.008562 | 0.010703 | 0.012385 | 0.014263 |
| -37.84 | 0.002384 | 0.003885 | 0.004788 | 0.006805 | 0.008514 | 0.010653 | 0.012312 | 0.014240 |
| -37.74 | 0.002365 | 0.003874 | 0.004768 | 0.006772 | 0.008515 | 0.010620 | 0.012329 | 0.014135 |
| -37.64 | 0.002362 | 0.003834 | 0.004745 | 0.006744 | 0.008457 | 0.010620 | 0.012285 | 0.014073 |
| -37.54 | 0.002362 | 0.003836 | 0.004721 | 0.006713 | 0.008441 | 0.010519 | 0.012177 | 0.014104 |
| -37.44 | 0.002338 | 0.003825 | 0.004695 | 0.006682 | 0.008351 | 0.010537 | 0.012135 | 0.014032 |
| -37.34 | 0.002342 | 0.003815 | 0.004662 | 0.006668 | 0.008315 | 0.010444 | 0.012037 | 0.013902 |
| -37.24 | 0.002314 | 0.003776 | 0.004627 | 0.006608 | 0.008295 | 0.010411 | 0.012025 | 0.013821 |
| -37.14 | 0.002307 | 0.003752 | 0.004610 | 0.006571 | 0.008249 | 0.010294 | 0.011974 | 0.013728 |
| -37.04 | 0.002298 | 0.003717 | 0.004587 | 0.006512 | 0.008209 | 0.010290 | 0.011875 | 0.013683 |
| -36.94 | 0.002293 | 0.003733 | 0.004572 | 0.006507 | 0.008167 | 0.010264 | 0.011826 | 0.013698 |
| -36.84 | 0.002263 | 0.003697 | 0.004543 | 0.006450 | 0.008091 | 0.010191 | 0.011699 | 0.013560 |
| -36.74 | 0.002267 | 0.003671 | 0.004521 | 0.006457 | 0.008099 | 0.010135 | 0.011721 | 0.013533 |
| -36.64 | 0.002250 | 0.003664 | 0.004506 | 0.006427 | 0.008088 | 0.010074 | 0.011697 | 0.013417 |
| -36.54 | 0.002245 | 0.003654 | 0.004491 | 0.006410 | 0.007989 | 0.010032 | 0.011580 | 0.013353 |
| -36.44 | 0.002225 | 0.003618 | 0.004461 | 0.006388 | 0.007979 | 0.010022 | 0.011539 | 0.013360 |
| -36.34 | 0.002221 | 0.003632 | 0.004473 | 0.006371 | 0.007935 | 0.009978 | 0.011541 | 0.013332 |
| -36.24 | 0.002222 | 0.003621 | 0.004433 | 0.006329 | 0.007910 | 0.009968 | 0.011458 | 0.013207 |
| -36.14 | 0.002196 | 0.003591 | 0.004407 | 0.006294 | 0.007858 | 0.009875 | 0.011340 | 0.013119 |
| -36.04 | 0.002206 | 0.003587 | 0.004427 | 0.006287 | 0.007878 | 0.009895 | 0.011383 | 0.013140 |
| -35.94 | 0.002181 | 0.003571 | 0.004405 | 0.006229 | 0.007849 | 0.009816 | 0.011341 | 0.013069 |
| -35.84 | 0.002189 | 0.003551 | 0.004367 | 0.006235 | 0.007775 | 0.009818 | 0.011298 | 0.013071 |
| -35.74 | 0.002165 | 0.003538 | 0.004342 | 0.006185 | 0.007745 | 0.009698 | 0.011219 | 0.012944 |
| -35.64 | 0.002162 | 0.003524 | 0.004342 | 0.006163 | 0.007722 | 0.009726 | 0.011183 | 0.012879 |
| -35.54 | 0.002152 | 0.003506 | 0.004298 | 0.006145 | 0.007663 | 0.009642 | 0.011133 | 0.012777 |
| -35.44 | 0.002147 | 0.003470 | 0.004286 | 0.006095 | 0.007631 | 0.009575 | 0.011045 | 0.012781 |
| -35.34 | 0.002133 | 0.003481 | 0.004256 | 0.006104 | 0.007625 | 0.009556 | 0.011087 | 0.012778 |
| -35.24 | 0.002118 | 0.003439 | 0.004245 | 0.006069 | 0.007603 | 0.009530 | 0.011006 | 0.012714 |
| -35.14 | 0.002099 | 0.003424 | 0.004206 | 0.006000 | 0.007500 | 0.009403 | 0.010895 | 0.012515 |
| -35.04 | 0.002091 | 0.003408 | 0.004215 | 0.005994 | 0.007530 | 0.009437 | 0.010882 | 0.012543 |
| -34.94 | 0.002080 | 0.003405 | 0.004198 | 0.005969 | 0.007434 | 0.009321 | 0.010830 | 0.012487 |
| -34.84 | 0.002084 | 0.003388 | 0.004164 | 0.005930 | 0.007424 | 0.009307 | 0.010720 | 0.012413 |
| -34.74 | 0.002048 | 0.003318 | 0.004116 | 0.005839 | 0.007349 | 0.009196 | 0.010593 | 0.012188 |
| -34.64 | 0.002033 | 0.003312 | 0.004078 | 0.005797 | 0.007286 | 0.009153 | 0.010512 | 0.012185 |
| -34.54 | 0.002029 | 0.003278 | 0.004040 | 0.005749 | 0.007196 | 0.009030 | 0.010452 | 0.012114 |
| -34.44 | 0.002017 | 0.003268 | 0.004013 | 0.005710 | 0.007161 | 0.008989 | 0.010393 | 0.011966 |
| -34.34 | 0.002014 | 0.003286 | 0.004028 | 0.005739 | 0.007166 | 0.009002 | 0.010390 | 0.012072 |
| -34.24 | 0.002010 | 0.003275 | 0.004031 | 0.005743 | 0.007178 | 0.009044 | 0.010449 | 0.012020 |
| -34.14 | 0.001994 | 0.003259 | 0.004016 | 0.005719 | 0.007116 | 0.008927 | 0.010374 | 0.011923 |
| -34.04 | 0.001994 | 0.003239 | 0.003978 | 0.005644 | 0.007079 | 0.008922 | 0.010323 | 0.011843 |
| -33.94 | 0.001970 | 0.003191 | 0.003956 | 0.005609 | 0.007062 | 0.008848 | 0.010178 | 0.011774 |
| -33.84 | 0.001949 | 0.003182 | 0.003921 | 0.005559 | 0.006969 | 0.008745 | 0.010136 | 0.011693 |
| -33.74 | 0.001954 | 0.003169 | 0.003914 | 0.005569 | 0.006950 | 0.008743 | 0.010135 | 0.011683 |
| -33.64 | 0.001947 | 0.003152 | 0.003903 | 0.005534 | 0.006944 | 0.008741 | 0.010043 | 0.011602 |
| -33.54 | 0.001952 | 0.003176 | 0.003914 | 0.005576 | 0.006982 | 0.008787 | 0.010151 | 0.011622 |
| -33.44 | 0.001950 | 0.003172 | 0.003887 | 0.005556 | 0.006954 | 0.008753 | 0.010035 | 0.011622 |
| -33.34 | 0.001948 | 0.003160 | 0.003874 | 0.005544 | 0.006955 | 0.008717 | 0.010052 | 0.011594 |
| -33.24 | 0.001930 | 0.003140 | 0.003899 | 0.005525 | 0.006916 | 0.008707 | 0.010041 | 0.011525 |
| -33.14 | 0.001924 | 0.003122 | 0.003848 | 0.005494 | 0.006874 | 0.008623 | 0.009992 | 0.011454 |
| -33.04 | 0.001922 | 0.003133 | 0.003839 | 0.005474 | 0.006861 | 0.008595 | 0.009952 | 0.011449 |
| -32.94 | 0.001914 | 0.003133 | 0.003834 | 0.005459 | 0.006855 | 0.008620 | 0.009974 | 0.011444 |
| -32.84 | 0.001948 | 0.003172 | 0.003883 | 0.005548 | 0.006934 | 0.008701 | 0.010024 | 0.011630 |
| -32.74 | 0.001954 | 0.003184 | 0.003926 | 0.005554 | 0.006985 | 0.008711 | 0.010089 | 0.011621 |
| -32.64 | 0.001946 | 0.003168 | 0.003909 | 0.005545 | 0.006957 | 0.008715 | 0.010058 | 0.011582 |
| -32.54 | 0.001946 | 0.003157 | 0.003907 | 0.005557 | 0.006937 | 0.008718 | 0.010031 | 0.011637 |
| -32.44 | 0.001927 | 0.003142 | 0.003883 | 0.005491 | 0.006889 | 0.008657 | 0.009972 | 0.011521 |
| -32.34 | 0.001923 | 0.003123 | 0.003854 | 0.005452 | 0.006886 | 0.008572 | 0.009932 | 0.011449 |
| -32.24 | 0.001917 | 0.003093 | 0.003841 | 0.005436 | 0.006811 | 0.008581 | 0.009859 | 0.011362 |
| -32.14 | 0.001906 | 0.003083 | 0.003820 | 0.005435 | 0.006818 | 0.008541 | 0.009834 | 0.011358 |
| -32.04 | 0.001896 | 0.003088 | 0.003787 | 0.005418 | 0.006772 | 0.008537 | 0.009859 | 0.011335 |
| -31.94 | 0.001892 | 0.003099 | 0.003819 | 0.005394 | 0.006794 | 0.008506 | 0.009864 | 0.011372 |
| -31.84 | 0.001897 | 0.003070 | 0.003805 | 0.005413 | 0.006771 | 0.008456 | 0.009827 | 0.011251 |
| -31.74 | 0.001877 | 0.003059 | 0.003763 | 0.005352 | 0.006710 | 0.008398 | 0.009773 | 0.011217 |
| -31.64 | 0.001870 | 0.003039 | 0.003764 | 0.005362 | 0.006734 | 0.008396 | 0.009747 | 0.011203 |
| -31.54 | 0.001860 | 0.003020 | 0.003722 | 0.005323 | 0.006659 | 0.008346 | 0.009604 | 0.011077 |
| -31.44 | 0.001847 | 0.003013 | 0.003709 | 0.005291 | 0.006645 | 0.008299 | 0.009594 | 0.011071 |
| -31.34 | 0.001849 | 0.003005 | 0.003729 | 0.005294 | 0.006630 | 0.008320 | 0.009625 | 0.011013 |
| -31.24 | 0.001862 | 0.003022 | 0.003714 | 0.005296 | 0.006666 | 0.008303 | 0.009642 | 0.011090 |
| -31.14 | 0.001855 | 0.003017 | 0.003732 | 0.005319 | 0.006630 | 0.008334 | 0.009601 | 0.011087 |
| -31.04 | 0.001857 | 0.003017 | 0.003732 | 0.005281 | 0.006655 | 0.008345 | 0.009632 | 0.011105 |
| -30.94 | 0.001854 | 0.003042 | 0.003715 | 0.005291 | 0.006662 | 0.008334 | 0.009667 | 0.011083 |
| -30.84 | 0.001852 | 0.003005 | 0.003713 | 0.005274 | 0.006595 | 0.008238 | 0.009545 | 0.011033 |
| -30.74 | 0.002128 | 0.003482 | 0.004289 | 0.006070 | 0.007620 | 0.009567 | 0.011056 | 0.012713 |
| -30.64 | 0.002944 | 0.004797 | 0.005924 | 0.008435 | 0.010498 | 0.013245 | 0.015206 | 0.017544 |
| -30.54 | 0.002961 | 0.004814 | 0.005935 | 0.008477 | 0.010630 | 0.013316 | 0.015386 | 0.017753 |
| -30.44 | 0.002101 | 0.003390 | 0.004203 | 0.005975 | 0.007474 | 0.009370 | 0.010879 | 0.012483 |
| -30.34 | 0.001620 | 0.002624 | 0.003248 | 0.004617 | 0.005755 | 0.007209 | 0.008331 | 0.009635 |
| -30.24 | 0.001528 | 0.002498 | 0.003065 | 0.004351 | 0.005446 | 0.006868 | 0.007901 | 0.009135 |
| -30.14 | 0.001548 | 0.002512 | 0.003082 | 0.004402 | 0.005504 | 0.006902 | 0.007988 | 0.009245 |
| -30.04 | 0.001581 | 0.002582 | 0.003177 | 0.004507 | 0.005669 | 0.007078 | 0.008208 | 0.009425 |
| -29.94 | 0.001608 | 0.002608 | 0.003233 | 0.004605 | 0.005750 | 0.007244 | 0.008368 | 0.009632 |
| -29.84 | 0.001617 | 0.002633 | 0.003239 | 0.004601 | 0.005766 | 0.007231 | 0.008353 | 0.009612 |
| -29.74 | 0.001606 | 0.002593 | 0.003201 | 0.004571 | 0.005700 | 0.007180 | 0.008250 | 0.009550 |
| -29.64 | 0.001592 | 0.002592 | 0.003198 | 0.004550 | 0.005724 | 0.007124 | 0.008289 | 0.009495 |
| -29.54 | 0.001590 | 0.002583 | 0.003182 | 0.004518 | 0.005672 | 0.007140 | 0.008248 | 0.009460 |
| -29.44 | 0.001565 | 0.002558 | 0.003142 | 0.004496 | 0.005601 | 0.007037 | 0.008166 | 0.009343 |
| -29.34 | 0.001544 | 0.002517 | 0.003087 | 0.004402 | 0.005520 | 0.006902 | 0.008019 | 0.009248 |
| -29.24 | 0.001535 | 0.002505 | 0.003079 | 0.004380 | 0.005462 | 0.006866 | 0.007948 | 0.009174 |
| -29.14 | 0.001526 | 0.002470 | 0.003048 | 0.004349 | 0.005451 | 0.006796 | 0.007905 | 0.009082 |
| -29.04 | 0.001511 | 0.002469 | 0.003036 | 0.004308 | 0.005424 | 0.006796 | 0.007808 | 0.009068 |
| -28.94 | 0.001495 | 0.002448 | 0.003001 | 0.004273 | 0.005368 | 0.006725 | 0.007729 | 0.008951 |
| -28.84 | 0.001488 | 0.002416 | 0.002977 | 0.004238 | 0.005326 | 0.006661 | 0.007720 | 0.008923 |
| -28.74 | 0.001477 | 0.002422 | 0.002965 | 0.004208 | 0.005322 | 0.006663 | 0.007680 | 0.008850 |
| -28.64 | 0.001476 | 0.002401 | 0.002965 | 0.004226 | 0.005313 | 0.006657 | 0.007657 | 0.008815 |
| -28.54 | 0.001472 | 0.002397 | 0.002934 | 0.004204 | 0.005263 | 0.006601 | 0.007634 | 0.008781 |
| -28.44 | 0.001454 | 0.002366 | 0.002908 | 0.004160 | 0.005195 | 0.006543 | 0.007530 | 0.008706 |
| -28.34 | 0.001455 | 0.002350 | 0.002909 | 0.004148 | 0.005197 | 0.006523 | 0.007536 | 0.008701 |
| -28.24 | 0.001446 | 0.002350 | 0.002901 | 0.004122 | 0.005155 | 0.006461 | 0.007487 | 0.008635 |
| -28.14 | 0.001429 | 0.002314 | 0.002863 | 0.004079 | 0.005083 | 0.006409 | 0.007367 | 0.008493 |
| -28.04 | 0.001415 | 0.002307 | 0.002848 | 0.004062 | 0.005077 | 0.006389 | 0.007363 | 0.008457 |
| -27.94 | 0.001417 | 0.002301 | 0.002825 | 0.004039 | 0.005052 | 0.006341 | 0.007298 | 0.008474 |
| -27.84 | 0.001396 | 0.002281 | 0.002794 | 0.003995 | 0.004981 | 0.006252 | 0.007215 | 0.008373 |
| -27.74 | 0.001395 | 0.002260 | 0.002790 | 0.003970 | 0.004953 | 0.006250 | 0.007213 | 0.008295 |
| -27.64 | 0.001374 | 0.002242 | 0.002769 | 0.003940 | 0.004900 | 0.006149 | 0.007156 | 0.008241 |
| -27.54 | 0.001366 | 0.002229 | 0.002736 | 0.003899 | 0.004897 | 0.006138 | 0.007099 | 0.008156 |
| -27.44 | 0.001355 | 0.002207 | 0.002715 | 0.003870 | 0.004867 | 0.006090 | 0.007027 | 0.008120 |
| -27.34 | 0.001352 | 0.002201 | 0.002714 | 0.003858 | 0.004812 | 0.006045 | 0.007007 | 0.008081 |
| -27.24 | 0.001345 | 0.002186 | 0.002690 | 0.003823 | 0.004780 | 0.005994 | 0.006959 | 0.008032 |
| -27.14 | 0.001338 | 0.002170 | 0.002676 | 0.003823 | 0.004794 | 0.006023 | 0.006923 | 0.008018 |
| -27.04 | 0.001326 | 0.002166 | 0.002671 | 0.003782 | 0.004766 | 0.005971 | 0.006890 | 0.007920 |
| -26.94 | 0.001321 | 0.002148 | 0.002637 | 0.003773 | 0.004714 | 0.005924 | 0.006821 | 0.007861 |
| -26.84 | 0.001311 | 0.002127 | 0.002640 | 0.003758 | 0.004707 | 0.005891 | 0.006823 | 0.007819 |
| -26.74 | 0.001301 | 0.002116 | 0.002615 | 0.003718 | 0.004676 | 0.005862 | 0.006777 | 0.007819 |
| -26.64 | 0.001296 | 0.002114 | 0.002614 | 0.003716 | 0.004647 | 0.005860 | 0.006722 | 0.007745 |
| -26.54 | 0.001289 | 0.002093 | 0.002583 | 0.003687 | 0.004595 | 0.005777 | 0.006652 | 0.007709 |
| -26.44 | 0.001288 | 0.002088 | 0.002573 | 0.003670 | 0.004602 | 0.005765 | 0.006656 | 0.007654 |
| -26.34 | 0.001277 | 0.002075 | 0.002561 | 0.003634 | 0.004537 | 0.005716 | 0.006605 | 0.007575 |
| -26.24 | 0.001262 | 0.002044 | 0.002520 | 0.003583 | 0.004502 | 0.005627 | 0.006493 | 0.007512 |
| -26.14 | 0.001245 | 0.002026 | 0.002503 | 0.003551 | 0.004446 | 0.005575 | 0.006457 | 0.007450 |
| -26.04 | 0.001238 | 0.002017 | 0.002492 | 0.003539 | 0.004446 | 0.005551 | 0.006400 | 0.007422 |
| -25.94 | 0.001239 | 0.002008 | 0.002468 | 0.003511 | 0.004406 | 0.005522 | 0.006413 | 0.007377 |
| -25.84 | 0.001222 | 0.001990 | 0.002456 | 0.003511 | 0.004398 | 0.005478 | 0.006335 | 0.007322 |
| -25.74 | 0.001223 | 0.001982 | 0.002447 | 0.003466 | 0.004362 | 0.005486 | 0.006313 | 0.007262 |
| -25.64 | 0.001210 | 0.001964 | 0.002434 | 0.003442 | 0.004315 | 0.005446 | 0.006266 | 0.007199 |
| -25.54 | 0.001195 | 0.001951 | 0.002406 | 0.003410 | 0.004299 | 0.005372 | 0.006181 | 0.007123 |
| -25.44 | 0.001188 | 0.001927 | 0.002394 | 0.003396 | 0.004245 | 0.005315 | 0.006164 | 0.007127 |
| -25.34 | 0.001188 | 0.001933 | 0.002398 | 0.003391 | 0.004272 | 0.005366 | 0.006190 | 0.007116 |
| -25.24 | 0.001177 | 0.001925 | 0.002367 | 0.003345 | 0.004199 | 0.005303 | 0.006087 | 0.007023 |
| -25.14 | 0.001167 | 0.001895 | 0.002348 | 0.003326 | 0.004191 | 0.005252 | 0.006058 | 0.007011 |
| -25.04 | 0.001169 | 0.001908 | 0.002352 | 0.003336 | 0.004207 | 0.005278 | 0.006088 | 0.007013 |
| -24.94 | 0.001175 | 0.001915 | 0.002361 | 0.003350 | 0.004175 | 0.005269 | 0.006060 | 0.007030 |
| -24.84 | 0.001170 | 0.001894 | 0.002341 | 0.003322 | 0.004167 | 0.005225 | 0.006052 | 0.006968 |
| -24.74 | 0.001160 | 0.001877 | 0.002328 | 0.003290 | 0.004118 | 0.005173 | 0.005981 | 0.006877 |
| -24.64 | 0.001146 | 0.001854 | 0.002287 | 0.003258 | 0.004077 | 0.005152 | 0.005930 | 0.006823 |
| -24.54 | 0.001143 | 0.001866 | 0.002298 | 0.003284 | 0.004090 | 0.005145 | 0.005945 | 0.006874 |
| -24.44 | 0.001159 | 0.001879 | 0.002309 | 0.003289 | 0.004148 | 0.005174 | 0.005995 | 0.006927 |
| -24.34 | 0.001169 | 0.001899 | 0.002337 | 0.003324 | 0.004180 | 0.005258 | 0.006081 | 0.006969 |
| -24.24 | 0.001185 | 0.001928 | 0.002376 | 0.003388 | 0.004241 | 0.005304 | 0.006166 | 0.007122 |
| -24.14 | 0.001199 | 0.001951 | 0.002405 | 0.003416 | 0.004313 | 0.005390 | 0.006226 | 0.007193 |
| -24.04 | 0.001221 | 0.001989 | 0.002441 | 0.003471 | 0.004372 | 0.005459 | 0.006328 | 0.007270 |
| -23.94 | 0.001246 | 0.002031 | 0.002489 | 0.003551 | 0.004438 | 0.005567 | 0.006478 | 0.007410 |
| -23.84 | 0.001247 | 0.002036 | 0.002507 | 0.003573 | 0.004478 | 0.005600 | 0.006502 | 0.007458 |
| -23.74 | 0.001233 | 0.002009 | 0.002472 | 0.003527 | 0.004406 | 0.005530 | 0.006417 | 0.007374 |
| -23.64 | 0.001215 | 0.001970 | 0.002435 | 0.003470 | 0.004352 | 0.005453 | 0.006256 | 0.007229 |
| -23.54 | 0.001200 | 0.001940 | 0.002406 | 0.003420 | 0.004286 | 0.005361 | 0.006175 | 0.007117 |
| -23.44 | 0.001169 | 0.001896 | 0.002335 | 0.003324 | 0.004180 | 0.005229 | 0.006049 | 0.006979 |
| -23.34 | 0.001125 | 0.001836 | 0.002249 | 0.003215 | 0.004025 | 0.005032 | 0.005828 | 0.006736 |
| -23.24 | 0.001077 | 0.001750 | 0.002162 | 0.003068 | 0.003844 | 0.004848 | 0.005588 | 0.006416 |
| -23.14 | 0.001065 | 0.001733 | 0.002148 | 0.003045 | 0.003809 | 0.004801 | 0.005555 | 0.006388 |
| -23.04 | 0.001014 | 0.001642 | 0.002028 | 0.002901 | 0.003639 | 0.004537 | 0.005233 | 0.006029 |
| -22.94 | 0.000983 | 0.001600 | 0.001977 | 0.002812 | 0.003523 | 0.004393 | 0.005098 | 0.005899 |
| -22.84 | 0.000961 | 0.001573 | 0.001935 | 0.002753 | 0.003443 | 0.004315 | 0.005012 | 0.005756 |
| -22.74 | 0.000941 | 0.001521 | 0.001884 | 0.002683 | 0.003340 | 0.004205 | 0.004861 | 0.005581 |
| -22.64 | 0.000960 | 0.001556 | 0.001918 | 0.002728 | 0.003417 | 0.004297 | 0.004990 | 0.005739 |
| -22.54 | 0.000941 | 0.001534 | 0.001896 | 0.002699 | 0.003359 | 0.004224 | 0.004878 | 0.005634 |
| -22.44 | 0.000931 | 0.001515 | 0.001876 | 0.002670 | 0.003329 | 0.004201 | 0.004842 | 0.005583 |
| -22.34 | 0.000916 | 0.001499 | 0.001843 | 0.002614 | 0.003272 | 0.004124 | 0.004735 | 0.005504 |
| -22.24 | 0.000910 | 0.001473 | 0.001814 | 0.002574 | 0.003235 | 0.004082 | 0.004696 | 0.005433 |
| -22.14 | 0.000892 | 0.001453 | 0.001782 | 0.002542 | 0.003193 | 0.003988 | 0.004642 | 0.005317 |
| -22.04 | 0.000881 | 0.001438 | 0.001779 | 0.002525 | 0.003176 | 0.003958 | 0.004576 | 0.005293 |
| -21.94 | 0.000866 | 0.001414 | 0.001748 | 0.002472 | 0.003114 | 0.003882 | 0.004516 | 0.005167 |
| -21.84 | 0.000874 | 0.001426 | 0.001756 | 0.002493 | 0.003140 | 0.003934 | 0.004522 | 0.005252 |
| -21.74 | 0.000871 | 0.001415 | 0.001740 | 0.002484 | 0.003122 | 0.003900 | 0.004493 | 0.005175 |
| -21.64 | 0.000858 | 0.001393 | 0.001724 | 0.002448 | 0.003076 | 0.003857 | 0.004427 | 0.005140 |
| -21.54 | 0.000843 | 0.001377 | 0.001683 | 0.002412 | 0.003017 | 0.003772 | 0.004353 | 0.005044 |
| -21.44 | 0.000820 | 0.001336 | 0.001636 | 0.002345 | 0.002938 | 0.003668 | 0.004251 | 0.004895 |
| -21.34 | 0.000807 | 0.001323 | 0.001623 | 0.002315 | 0.002900 | 0.003615 | 0.004211 | 0.004848 |
| -21.24 | 0.000802 | 0.001312 | 0.001608 | 0.002306 | 0.002884 | 0.003621 | 0.004187 | 0.004832 |
| -21.14 | 0.000794 | 0.001291 | 0.001592 | 0.002264 | 0.002834 | 0.003562 | 0.004117 | 0.004761 |
| -21.04 | 0.000784 | 0.001282 | 0.001569 | 0.002234 | 0.002806 | 0.003528 | 0.004073 | 0.004705 |
| -20.94 | 0.000772 | 0.001255 | 0.001551 | 0.002196 | 0.002754 | 0.003463 | 0.004007 | 0.004625 |
| -20.84 | 0.000783 | 0.001275 | 0.001572 | 0.002224 | 0.002781 | 0.003516 | 0.004033 | 0.004668 |
| -20.74 | 0.000793 | 0.001296 | 0.001588 | 0.002258 | 0.002825 | 0.003544 | 0.004093 | 0.004725 |
| -20.64 | 0.000796 | 0.001297 | 0.001598 | 0.002275 | 0.002852 | 0.003551 | 0.004116 | 0.004763 |
| -20.54 | 0.000570 | 0.000926 | 0.001145 | 0.001632 | 0.002040 | 0.002552 | 0.002959 | 0.003412 |
| -20.44 | 0.000020 | 0.000033 | 0.000041 | 0.000058 | 0.000073 | 0.000091 | 0.000105 | 0.000121 |
| -20.34 | -0.000520 | -0.000845 | -0.001041 | -0.001486 | -0.001870 | -0.002338 | -0.002705 | -0.003115 |
| -20.24 | -0.000676 | -0.001093 | -0.001355 | -0.001921 | -0.002399 | -0.003008 | -0.003489 | -0.004028 |
| -20.14 | -0.000309 | -0.000502 | -0.000615 | -0.000879 | -0.001101 | -0.001378 | -0.001595 | -0.001839 |
| -20.04 | 0.000145 | 0.000234 | 0.000291 | 0.000411 | 0.000517 | 0.000647 | 0.000746 | 0.000861 |
| -19.94 | 0.000375 | 0.000611 | 0.000749 | 0.001069 | 0.001343 | 0.001680 | 0.001935 | 0.002244 |
| -19.84 | 0.000531 | 0.000866 | 0.001059 | 0.001513 | 0.001888 | 0.002373 | 0.002742 | 0.003164 |
| -19.74 | 0.000587 | 0.000950 | 0.001178 | 0.001675 | 0.002101 | 0.002617 | 0.003037 | 0.003499 |
| -19.64 | 0.000590 | 0.000961 | 0.001190 | 0.001685 | 0.002115 | 0.002640 | 0.003074 | 0.003521 |
| -19.54 | 0.000612 | 0.000997 | 0.001229 | 0.001746 | 0.002196 | 0.002735 | 0.003163 | 0.003650 |
| -19.44 | 0.000620 | 0.001017 | 0.001247 | 0.001782 | 0.002229 | 0.002798 | 0.003237 | 0.003728 |
| -19.34 | 0.000630 | 0.001025 | 0.001260 | 0.001792 | 0.002259 | 0.002821 | 0.003246 | 0.003749 |
| -19.24 | 0.000646 | 0.001052 | 0.001289 | 0.001846 | 0.002317 | 0.002900 | 0.003335 | 0.003841 |
| -19.14 | 0.000667 | 0.001083 | 0.001338 | 0.001910 | 0.002377 | 0.002988 | 0.003470 | 0.003998 |
| -19.04 | 0.000689 | 0.001121 | 0.001375 | 0.001955 | 0.002462 | 0.003094 | 0.003556 | 0.004113 |
| -18.94 | 0.000695 | 0.001132 | 0.001402 | 0.001992 | 0.002492 | 0.003117 | 0.003608 | 0.004152 |
| -18.84 | 0.000701 | 0.001140 | 0.001408 | 0.002006 | 0.002513 | 0.003147 | 0.003648 | 0.004184 |
| -18.74 | 0.000691 | 0.001125 | 0.001388 | 0.001975 | 0.002485 | 0.003107 | 0.003574 | 0.004131 |
| -18.64 | 0.000686 | 0.001109 | 0.001371 | 0.001958 | 0.002443 | 0.003077 | 0.003551 | 0.004093 |
| -18.54 | 0.000674 | 0.001106 | 0.001362 | 0.001935 | 0.002409 | 0.003022 | 0.003509 | 0.004038 |
| -18.44 | 0.000678 | 0.001102 | 0.001357 | 0.001922 | 0.002410 | 0.003044 | 0.003516 | 0.004024 |
| -18.34 | 0.000658 | 0.001068 | 0.001316 | 0.001869 | 0.002345 | 0.002956 | 0.003392 | 0.003915 |
| -18.24 | 0.000641 | 0.001044 | 0.001294 | 0.001838 | 0.002304 | 0.002889 | 0.003344 | 0.003858 |
| -18.14 | 0.000639 | 0.001040 | 0.001277 | 0.001822 | 0.002294 | 0.002877 | 0.003303 | 0.003824 |
| -18.04 | 0.000624 | 0.001021 | 0.001251 | 0.001777 | 0.002242 | 0.002794 | 0.003233 | 0.003716 |
| -17.94 | 0.000617 | 0.001003 | 0.001237 | 0.001758 | 0.002210 | 0.002779 | 0.003207 | 0.003691 |
| -17.84 | 0.000614 | 0.000999 | 0.001233 | 0.001763 | 0.002208 | 0.002761 | 0.003200 | 0.003692 |
| -17.74 | 0.000608 | 0.000991 | 0.001223 | 0.001731 | 0.002187 | 0.002730 | 0.003168 | 0.003645 |
| -17.64 | 0.000601 | 0.000979 | 0.001205 | 0.001709 | 0.002150 | 0.002692 | 0.003118 | 0.003575 |
| -17.54 | 0.000601 | 0.000981 | 0.001203 | 0.001720 | 0.002141 | 0.002697 | 0.003107 | 0.003597 |
| -17.44 | 0.000591 | 0.000967 | 0.001185 | 0.001686 | 0.002116 | 0.002647 | 0.003055 | 0.003524 |
| -17.34 | 0.000592 | 0.000960 | 0.001191 | 0.001689 | 0.002117 | 0.002658 | 0.003059 | 0.003531 |
| -17.24 | 0.000588 | 0.000956 | 0.001174 | 0.001673 | 0.002090 | 0.002635 | 0.003037 | 0.003490 |
| -17.14 | 0.000588 | 0.000953 | 0.001172 | 0.001676 | 0.002100 | 0.002637 | 0.003029 | 0.003501 |
| -17.04 | 0.000580 | 0.000945 | 0.001161 | 0.001654 | 0.002072 | 0.002610 | 0.002991 | 0.003466 |
| -16.94 | 0.000573 | 0.000936 | 0.001151 | 0.001630 | 0.002054 | 0.002580 | 0.002974 | 0.003437 |
| -16.84 | 0.000566 | 0.000921 | 0.001138 | 0.001610 | 0.002028 | 0.002537 | 0.002936 | 0.003393 |
| -16.74 | 0.000571 | 0.000929 | 0.001142 | 0.001620 | 0.002035 | 0.002551 | 0.002944 | 0.003416 |
| -16.64 | 0.000570 | 0.000923 | 0.001141 | 0.001617 | 0.002035 | 0.002553 | 0.002945 | 0.003377 |
| -16.54 | 0.000566 | 0.000925 | 0.001133 | 0.001618 | 0.002033 | 0.002543 | 0.002926 | 0.003373 |
| -16.44 | 0.000550 | 0.000897 | 0.001110 | 0.001567 | 0.001974 | 0.002463 | 0.002854 | 0.003307 |
| -16.34 | 0.000534 | 0.000870 | 0.001068 | 0.001526 | 0.001908 | 0.002384 | 0.002754 | 0.003184 |
| -16.24 | 0.000522 | 0.000855 | 0.001046 | 0.001490 | 0.001868 | 0.002355 | 0.002713 | 0.003122 |
| -16.14 | 0.000505 | 0.000821 | 0.001015 | 0.001433 | 0.001810 | 0.002254 | 0.002622 | 0.003021 |
| -16.04 | 0.000493 | 0.000800 | 0.000994 | 0.001405 | 0.001769 | 0.002214 | 0.002558 | 0.002952 |
| -15.94 | 0.000482 | 0.000785 | 0.000969 | 0.001371 | 0.001731 | 0.002166 | 0.002496 | 0.002890 |
| -15.84 | 0.000464 | 0.000755 | 0.000934 | 0.001324 | 0.001659 | 0.002077 | 0.002401 | 0.002769 |
| -15.74 | 0.000451 | 0.000734 | 0.000902 | 0.001285 | 0.001612 | 0.002022 | 0.002338 | 0.002700 |
| -15.64 | 0.000432 | 0.000704 | 0.000865 | 0.001231 | 0.001550 | 0.001943 | 0.002251 | 0.002589 |
| -15.54 | 0.000416 | 0.000680 | 0.000833 | 0.001190 | 0.001488 | 0.001869 | 0.002159 | 0.002493 |
| -15.44 | 0.000405 | 0.000661 | 0.000815 | 0.001161 | 0.001451 | 0.001825 | 0.002095 | 0.002415 |
| -15.34 | 0.000382 | 0.000621 | 0.000761 | 0.001084 | 0.001360 | 0.001701 | 0.001969 | 0.002267 |
| -15.24 | 0.000378 | 0.000613 | 0.000760 | 0.001078 | 0.001351 | 0.001694 | 0.001956 | 0.002261 |
| -15.14 | 0.000366 | 0.000594 | 0.000733 | 0.001040 | 0.001308 | 0.001649 | 0.001899 | 0.002197 |
| -15.04 | 0.000368 | 0.000599 | 0.000739 | 0.001050 | 0.001311 | 0.001654 | 0.001903 | 0.002188 |
| -14.94 | 0.000358 | 0.000585 | 0.000717 | 0.001027 | 0.001288 | 0.001604 | 0.001865 | 0.002150 |
| -14.84 | 0.000346 | 0.000565 | 0.000696 | 0.000989 | 0.001245 | 0.001558 | 0.001794 | 0.002065 |
| -14.74 | 0.000349 | 0.000563 | 0.000695 | 0.000986 | 0.001242 | 0.001553 | 0.001801 | 0.002071 |
| -14.64 | 0.000344 | 0.000558 | 0.000690 | 0.000975 | 0.001233 | 0.001542 | 0.001785 | 0.002048 |
| -14.54 | 0.000334 | 0.000547 | 0.000673 | 0.000958 | 0.001194 | 0.001502 | 0.001739 | 0.001998 |
| -14.44 | 0.000337 | 0.000547 | 0.000670 | 0.000957 | 0.001201 | 0.001500 | 0.001741 | 0.001998 |
| -14.34 | 0.000338 | 0.000546 | 0.000673 | 0.000956 | 0.001205 | 0.001504 | 0.001749 | 0.002012 |
| -14.24 | 0.000332 | 0.000538 | 0.000663 | 0.000940 | 0.001177 | 0.001481 | 0.001714 | 0.001979 |
| -14.14 | 0.000325 | 0.000526 | 0.000650 | 0.000925 | 0.001160 | 0.001451 | 0.001676 | 0.001944 |
| -14.04 | 0.000321 | 0.000520 | 0.000644 | 0.000912 | 0.001143 | 0.001441 | 0.001668 | 0.001918 |
| -13.94 | 0.000319 | 0.000518 | 0.000639 | 0.000904 | 0.001135 | 0.001426 | 0.001648 | 0.001909 |
| -13.84 | 0.000313 | 0.000511 | 0.000631 | 0.000894 | 0.001120 | 0.001410 | 0.001625 | 0.001874 |
| -13.74 | 0.000308 | 0.000501 | 0.000616 | 0.000876 | 0.001102 | 0.001378 | 0.001595 | 0.001831 |
| -13.64 | 0.000292 | 0.000474 | 0.000588 | 0.000833 | 0.001040 | 0.001314 | 0.001518 | 0.001752 |
| -13.54 | 0.000294 | 0.000479 | 0.000589 | 0.000839 | 0.001058 | 0.001327 | 0.001531 | 0.001759 |
| -13.44 | 0.000293 | 0.000475 | 0.000588 | 0.000832 | 0.001041 | 0.001311 | 0.001516 | 0.001740 |
| -13.34 | 0.000287 | 0.000469 | 0.000580 | 0.000824 | 0.001035 | 0.001297 | 0.001492 | 0.001723 |
| -13.24 | 0.000282 | 0.000458 | 0.000565 | 0.000802 | 0.001012 | 0.001269 | 0.001468 | 0.001691 |
| -13.14 | 0.000277 | 0.000450 | 0.000554 | 0.000792 | 0.000985 | 0.001236 | 0.001438 | 0.001647 |
| -13.04 | 0.000274 | 0.000448 | 0.000552 | 0.000784 | 0.000977 | 0.001235 | 0.001420 | 0.001646 |
| -12.94 | 0.000269 | 0.000436 | 0.000537 | 0.000765 | 0.000961 | 0.001199 | 0.001394 | 0.001605 |
| -12.84 | 0.000256 | 0.000419 | 0.000516 | 0.000732 | 0.000916 | 0.001147 | 0.001332 | 0.001526 |
| -12.74 | 0.000263 | 0.000427 | 0.000526 | 0.000753 | 0.000941 | 0.001181 | 0.001366 | 0.001572 |
| -12.64 | 0.000265 | 0.000433 | 0.000533 | 0.000756 | 0.000948 | 0.001195 | 0.001374 | 0.001581 |
| -12.54 | 0.000276 | 0.000450 | 0.000553 | 0.000785 | 0.000983 | 0.001238 | 0.001423 | 0.001638 |
| -12.44 | 0.000281 | 0.000459 | 0.000567 | 0.000802 | 0.001005 | 0.001263 | 0.001465 | 0.001692 |
| -12.34 | 0.000292 | 0.000471 | 0.000581 | 0.000828 | 0.001037 | 0.001303 | 0.001500 | 0.001733 |
| -12.24 | 0.000284 | 0.000462 | 0.000569 | 0.000810 | 0.001018 | 0.001275 | 0.001474 | 0.001705 |
| -12.14 | 0.000269 | 0.000437 | 0.000539 | 0.000766 | 0.000967 | 0.001213 | 0.001395 | 0.001617 |
| -12.04 | 0.000258 | 0.000420 | 0.000519 | 0.000739 | 0.000920 | 0.001155 | 0.001340 | 0.001540 |
| -11.94 | 0.000243 | 0.000395 | 0.000487 | 0.000697 | 0.000870 | 0.001098 | 0.001261 | 0.001459 |
| -11.84 | 0.000226 | 0.000368 | 0.000455 | 0.000648 | 0.000808 | 0.001012 | 0.001174 | 0.001349 |
| -11.74 | 0.000208 | 0.000339 | 0.000417 | 0.000591 | 0.000741 | 0.000934 | 0.001079 | 0.001236 |
| -11.64 | 0.000171 | 0.000278 | 0.000342 | 0.000489 | 0.000612 | 0.000769 | 0.000883 | 0.001017 |
| -11.54 | 0.000126 | 0.000205 | 0.000254 | 0.000362 | 0.000454 | 0.000570 | 0.000659 | 0.000760 |
| -11.44 | 0.000116 | 0.000189 | 0.000233 | 0.000330 | 0.000415 | 0.000521 | 0.000600 | 0.000692 |
| -11.34 | 0.000115 | 0.000188 | 0.000233 | 0.000331 | 0.000415 | 0.000519 | 0.000599 | 0.000688 |
| -11.24 | 0.000131 | 0.000213 | 0.000263 | 0.000372 | 0.000467 | 0.000589 | 0.000678 | 0.000779 |
| -11.14 | 0.000173 | 0.000283 | 0.000349 | 0.000495 | 0.000624 | 0.000776 | 0.000896 | 0.001036 |
| -11.04 | 0.000276 | 0.000450 | 0.000556 | 0.000790 | 0.000986 | 0.001239 | 0.001435 | 0.001645 |
| -10.94 | 0.000389 | 0.000632 | 0.000779 | 0.001111 | 0.001387 | 0.001742 | 0.002015 | 0.002323 |
| -10.84 | 0.000510 | 0.000832 | 0.001024 | 0.001459 | 0.001821 | 0.002294 | 0.002636 | 0.003066 |
| -10.74 | 0.000607 | 0.000990 | 0.001223 | 0.001743 | 0.002178 | 0.002728 | 0.003164 | 0.003636 |
| -10.64 | 0.000708 | 0.001152 | 0.001421 | 0.002015 | 0.002529 | 0.003187 | 0.003673 | 0.004227 |
| -10.54 | 0.000652 | 0.001060 | 0.001298 | 0.001851 | 0.002326 | 0.002926 | 0.003381 | 0.003867 |
| -10.44 | 0.000516 | 0.000837 | 0.001031 | 0.001464 | 0.001838 | 0.002302 | 0.002674 | 0.003079 |
| -10.34 | 0.000223 | 0.000363 | 0.000448 | 0.000635 | 0.000800 | 0.001004 | 0.001158 | 0.001331 |
| -10.24 | 0.000016 | 0.000027 | 0.000033 | 0.000047 | 0.000059 | 0.000074 | 0.000085 | 0.000099 |
| -10.14 | -0.000025 | -0.000041 | -0.000051 | -0.000072 | -0.000091 | -0.000114 | -0.000131 | -0.000151 |
| -10.04 | -0.000050 | -0.000081 | -0.000100 | -0.000141 | -0.000177 | -0.000223 | -0.000259 | -0.000297 |
| -9.94 | -0.000060 | -0.000098 | -0.000120 | -0.000171 | -0.000213 | -0.000267 | -0.000310 | -0.000359 |
| -9.84 | -0.000075 | -0.000123 | -0.000152 | -0.000216 | -0.000269 | -0.000338 | -0.000391 | -0.000451 |
| -9.74 | -0.000082 | -0.000135 | -0.000166 | -0.000237 | -0.000294 | -0.000372 | -0.000428 | -0.000494 |
| -9.64 | -0.000086 | -0.000140 | -0.000172 | -0.000246 | -0.000308 | -0.000385 | -0.000445 | -0.000516 |
| -9.54 | -0.000092 | -0.000151 | -0.000185 | -0.000266 | -0.000333 | -0.000415 | -0.000479 | -0.000553 |
| -9.44 | -0.000109 | -0.000178 | -0.000218 | -0.000312 | -0.000388 | -0.000487 | -0.000564 | -0.000652 |
| -9.34 | -0.000120 | -0.000197 | -0.000242 | -0.000343 | -0.000433 | -0.000540 | -0.000624 | -0.000722 |
| -9.24 | -0.000134 | -0.000219 | -0.000269 | -0.000382 | -0.000479 | -0.000600 | -0.000693 | -0.000798 |
| -9.14 | -0.000136 | -0.000221 | -0.000272 | -0.000387 | -0.000482 | -0.000606 | -0.000702 | -0.000811 |
| -9.04 | -0.000140 | -0.000229 | -0.000280 | -0.000400 | -0.000501 | -0.000630 | -0.000726 | -0.000839 |
| -8.94 | -0.000166 | -0.000269 | -0.000332 | -0.000471 | -0.000593 | -0.000743 | -0.000857 | -0.000992 |
| -8.84 | -0.000189 | -0.000308 | -0.000380 | -0.000539 | -0.000678 | -0.000848 | -0.000979 | -0.001129 |
| -8.74 | -0.000196 | -0.000321 | -0.000394 | -0.000563 | -0.000702 | -0.000886 | -0.001017 | -0.001180 |
| -8.64 | -0.000192 | -0.000314 | -0.000385 | -0.000549 | -0.000688 | -0.000863 | -0.000995 | -0.001147 |
| -8.54 | -0.000210 | -0.000340 | -0.000419 | -0.000596 | -0.000745 | -0.000936 | -0.001084 | -0.001246 |
| -8.44 | -0.000221 | -0.000358 | -0.000444 | -0.000628 | -0.000792 | -0.000996 | -0.001150 | -0.001322 |
| -8.34 | -0.000223 | -0.000362 | -0.000446 | -0.000634 | -0.000792 | -0.000995 | -0.001157 | -0.001325 |
| -8.24 | -0.000228 | -0.000370 | -0.000455 | -0.000651 | -0.000815 | -0.001016 | -0.001182 | -0.001361 |
| -8.14 | -0.000245 | -0.000397 | -0.000489 | -0.000696 | -0.000876 | -0.001098 | -0.001263 | -0.001457 |
| -8.04 | -0.000252 | -0.000409 | -0.000507 | -0.000717 | -0.000904 | -0.001134 | -0.001307 | -0.001507 |
| -7.94 | -0.000268 | -0.000432 | -0.000533 | -0.000759 | -0.000957 | -0.001199 | -0.001380 | -0.001587 |
| -7.84 | -0.000269 | -0.000440 | -0.000539 | -0.000770 | -0.000966 | -0.001208 | -0.001396 | -0.001618 |
| -7.74 | -0.000284 | -0.000461 | -0.000570 | -0.000811 | -0.001010 | -0.001274 | -0.001471 | -0.001696 |
| -7.64 | -0.000288 | -0.000467 | -0.000575 | -0.000818 | -0.001029 | -0.001281 | -0.001481 | -0.001720 |
| -7.54 | -0.000291 | -0.000473 | -0.000585 | -0.000828 | -0.001041 | -0.001304 | -0.001509 | -0.001747 |
| -7.44 | -0.000301 | -0.000490 | -0.000599 | -0.000859 | -0.001075 | -0.001348 | -0.001553 | -0.001792 |
| -7.34 | -0.000301 | -0.000491 | -0.000607 | -0.000864 | -0.001074 | -0.001348 | -0.001557 | -0.001802 |
| -7.24 | -0.000315 | -0.000510 | -0.000630 | -0.000900 | -0.001128 | -0.001412 | -0.001624 | -0.001880 |
| -7.14 | -0.000325 | -0.000531 | -0.000652 | -0.000932 | -0.001168 | -0.001457 | -0.001691 | -0.001943 |
| -7.04 | -0.000327 | -0.000533 | -0.000658 | -0.000938 | -0.001171 | -0.001477 | -0.001708 | -0.001954 |
| -6.94 | -0.000341 | -0.000557 | -0.000682 | -0.000977 | -0.001218 | -0.001537 | -0.001775 | -0.002034 |
| -6.84 | -0.000350 | -0.000571 | -0.000703 | -0.000995 | -0.001246 | -0.001573 | -0.001806 | -0.002088 |
| -6.74 | -0.000347 | -0.000567 | -0.000698 | -0.000987 | -0.001240 | -0.001552 | -0.001794 | -0.002076 |
| -6.64 | -0.000349 | -0.000570 | -0.000701 | -0.001000 | -0.001249 | -0.001568 | -0.001817 | -0.002087 |
| -6.54 | -0.000353 | -0.000578 | -0.000711 | -0.001009 | -0.001265 | -0.001587 | -0.001838 | -0.002118 |
| -6.44 | -0.000349 | -0.000571 | -0.000702 | -0.000995 | -0.001246 | -0.001565 | -0.001805 | -0.002094 |
| -6.34 | -0.000351 | -0.000574 | -0.000708 | -0.001008 | -0.001254 | -0.001577 | -0.001816 | -0.002096 |
| -6.24 | -0.000371 | -0.000604 | -0.000747 | -0.001059 | -0.001330 | -0.001671 | -0.001922 | -0.002220 |
| -6.14 | -0.000375 | -0.000610 | -0.000752 | -0.001069 | -0.001332 | -0.001673 | -0.001933 | -0.002230 |
| -6.04 | -0.000386 | -0.000630 | -0.000776 | -0.001107 | -0.001384 | -0.001740 | -0.002006 | -0.002309 |
| -5.94 | -0.000398 | -0.000646 | -0.000800 | -0.001132 | -0.001418 | -0.001780 | -0.002060 | -0.002370 |
| -5.84 | -0.000422 | -0.000684 | -0.000846 | -0.001200 | -0.001503 | -0.001887 | -0.002172 | -0.002505 |
| -5.74 | -0.000432 | -0.000704 | -0.000868 | -0.001229 | -0.001550 | -0.001933 | -0.002235 | -0.002577 |
| -5.64 | -0.000471 | -0.000764 | -0.000943 | -0.001339 | -0.001680 | -0.002109 | -0.002449 | -0.002815 |
| -5.54 | -0.000492 | -0.000800 | -0.000992 | -0.001410 | -0.001761 | -0.002210 | -0.002552 | -0.002937 |
| -5.44 | -0.000521 | -0.000848 | -0.001045 | -0.001497 | -0.001864 | -0.002338 | -0.002721 | -0.003116 |
| -5.34 | -0.000534 | -0.000869 | -0.001071 | -0.001524 | -0.001906 | -0.002388 | -0.002759 | -0.003176 |
| -5.24 | -0.000565 | -0.000926 | -0.001139 | -0.001617 | -0.002029 | -0.002546 | -0.002950 | -0.003402 |
| -5.14 | -0.000587 | -0.000954 | -0.001178 | -0.001681 | -0.002096 | -0.002625 | -0.003048 | -0.003520 |
| -5.04 | -0.000611 | -0.000993 | -0.001223 | -0.001748 | -0.002190 | -0.002738 | -0.003171 | -0.003650 |
| -4.94 | -0.000636 | -0.001038 | -0.001281 | -0.001813 | -0.002271 | -0.002857 | -0.003287 | -0.003786 |
| -4.84 | -0.000627 | -0.001021 | -0.001256 | -0.001785 | -0.002232 | -0.002802 | -0.003239 | -0.003714 |
| -4.74 | -0.000647 | -0.001055 | -0.001303 | -0.001847 | -0.002312 | -0.002897 | -0.003372 | -0.003868 |
| -4.64 | -0.000632 | -0.001029 | -0.001265 | -0.001804 | -0.002249 | -0.002821 | -0.003275 | -0.003750 |
| -4.54 | -0.000648 | -0.001060 | -0.001305 | -0.001858 | -0.002330 | -0.002910 | -0.003381 | -0.003898 |
| -4.44 | -0.000651 | -0.001060 | -0.001313 | -0.001855 | -0.002328 | -0.002919 | -0.003368 | -0.003889 |
| -4.34 | -0.000653 | -0.001058 | -0.001307 | -0.001852 | -0.002342 | -0.002925 | -0.003374 | -0.003901 |
| -4.24 | -0.000665 | -0.001090 | -0.001341 | -0.001906 | -0.002392 | -0.002988 | -0.003456 | -0.003972 |
| -4.14 | -0.000654 | -0.001062 | -0.001314 | -0.001870 | -0.002338 | -0.002924 | -0.003388 | -0.003920 |
| -4.04 | -0.000639 | -0.001037 | -0.001273 | -0.001809 | -0.002284 | -0.002859 | -0.003304 | -0.003796 |
| -3.94 | -0.000627 | -0.001012 | -0.001247 | -0.001778 | -0.002242 | -0.002812 | -0.003243 | -0.003741 |
| -3.84 | -0.000577 | -0.000939 | -0.001152 | -0.001635 | -0.002062 | -0.002581 | -0.002981 | -0.003432 |
| -3.74 | -0.000569 | -0.000928 | -0.001142 | -0.001633 | -0.002043 | -0.002552 | -0.002946 | -0.003418 |
| -3.64 | -0.000601 | -0.000980 | -0.001199 | -0.001707 | -0.002154 | -0.002689 | -0.003123 | -0.003579 |
| -3.54 | -0.000600 | -0.000977 | -0.001207 | -0.001710 | -0.002141 | -0.002698 | -0.003119 | -0.003599 |
| -3.44 | -0.000586 | -0.000951 | -0.001178 | -0.001669 | -0.002100 | -0.002633 | -0.003032 | -0.003506 |
| -3.34 | -0.000588 | -0.000958 | -0.001176 | -0.001665 | -0.002099 | -0.002636 | -0.003028 | -0.003492 |
| -3.24 | -0.000592 | -0.000958 | -0.001179 | -0.001683 | -0.002113 | -0.002649 | -0.003066 | -0.003515 |
| -3.14 | -0.000586 | -0.000956 | -0.001180 | -0.001676 | -0.002094 | -0.002625 | -0.003030 | -0.003489 |
| -3.04 | -0.000604 | -0.000980 | -0.001216 | -0.001719 | -0.002155 | -0.002717 | -0.003141 | -0.003625 |
| -2.94 | -0.000650 | -0.001056 | -0.001300 | -0.001847 | -0.002320 | -0.002912 | -0.003358 | -0.003862 |
| -2.84 | -0.000603 | -0.000981 | -0.001210 | -0.001718 | -0.002146 | -0.002705 | -0.003109 | -0.003587 |
| -2.74 | -0.000617 | -0.001003 | -0.001244 | -0.001761 | -0.002205 | -0.002774 | -0.003199 | -0.003706 |
| -2.64 | -0.000623 | -0.001016 | -0.001251 | -0.001784 | -0.002231 | -0.002802 | -0.003230 | -0.003718 |
| -2.54 | -0.000677 | -0.001092 | -0.001347 | -0.001918 | -0.002414 | -0.003021 | -0.003494 | -0.004036 |
| -2.44 | -0.000494 | -0.000804 | -0.000999 | -0.001415 | -0.001771 | -0.002231 | -0.002570 | -0.002970 |
| -2.34 | 0.000062 | 0.000100 | 0.000124 | 0.000176 | 0.000221 | 0.000277 | 0.000321 | 0.000369 |
| -2.24 | 0.001427 | 0.002338 | 0.002864 | 0.004087 | 0.005109 | 0.006448 | 0.007392 | 0.008589 |
| -2.14 | 0.003690 | 0.005994 | 0.007408 | 0.010547 | 0.013199 | 0.016501 | 0.019124 | 0.021984 |
| -2.04 | 0.007089 | 0.011495 | 0.014124 | 0.020215 | 0.025241 | 0.031720 | 0.036649 | 0.042163 |
| -1.94 | 0.011587 | 0.018923 | 0.023230 | 0.033033 | 0.041567 | 0.051983 | 0.059948 | 0.069571 |
| -1.84 | 0.016740 | 0.027428 | 0.033644 | 0.048020 | 0.060014 | 0.075167 | 0.086575 | 0.099857 |
| -1.74 | 0.022683 | 0.036633 | 0.045149 | 0.064676 | 0.081104 | 0.101466 | 0.116654 | 0.135499 |
| -1.64 | 0.029288 | 0.047466 | 0.058308 | 0.083347 | 0.103924 | 0.130390 | 0.150563 | 0.174351 |
| -1.54 | 0.035990 | 0.058683 | 0.072354 | 0.103370 | 0.128969 | 0.162630 | 0.186739 | 0.216217 |
| -1.44 | 0.043285 | 0.070993 | 0.087392 | 0.123416 | 0.156083 | 0.194933 | 0.224924 | 0.260011 |
| -1.34 | 0.051084 | 0.083509 | 0.102619 | 0.145518 | 0.183070 | 0.229929 | 0.264552 | 0.305574 |
| -1.24 | 0.058934 | 0.096315 | 0.118356 | 0.168568 | 0.212446 | 0.265054 | 0.306007 | 0.353031 |
| -1.14 | 0.067573 | 0.109959 | 0.135039 | 0.192562 | 0.240458 | 0.302819 | 0.350749 | 0.402312 |
| -1.04 | 0.076091 | 0.123012 | 0.152417 | 0.216283 | 0.270526 | 0.340540 | 0.392915 | 0.453685 |
| -0.940002 | 0.084414 | 0.137012 | 0.169618 | 0.241631 | 0.303068 | 0.377188 | 0.437838 | 0.506325 |
| -0.84 | 0.092905 | 0.152197 | 0.186420 | 0.264710 | 0.332227 | 0.417498 | 0.483354 | 0.554120 |
| -0.740002 | 0.102374 | 0.166229 | 0.203628 | 0.290938 | 0.363754 | 0.455497 | 0.527628 | 0.609181 |
| -0.640003 | 0.110683 | 0.180095 | 0.221754 | 0.317068 | 0.395328 | 0.496807 | 0.576523 | 0.661765 |
| -0.540001 | 0.119734 | 0.194231 | 0.240239 | 0.341951 | 0.429541 | 0.537773 | 0.622311 | 0.713359 |
| -0.440002 | 0.129220 | 0.209083 | 0.258315 | 0.369313 | 0.459620 | 0.579264 | 0.666612 | 0.770570 |
| -0.34 | 0.138402 | 0.224010 | 0.276762 | 0.393464 | 0.495551 | 0.618440 | 0.718761 | 0.825729 |
| -0.240002 | 0.147027 | 0.239494 | 0.296923 | 0.421275 | 0.529576 | 0.663286 | 0.765167 | 0.882947 |
| -0.140003 | 0.156585 | 0.253849 | 0.314323 | 0.444310 | 0.557718 | 0.702428 | 0.811986 | 0.935758 |
| -0.0400009 | 0.168377 | 0.272886 | 0.338249 | 0.479055 | 0.600076 | 0.753836 | 0.869567 | 1.006562 |
| 0.0599976 | 0.176435 | 0.287700 | 0.352948 | 0.505777 | 0.633618 | 0.790931 | 0.914813 | 1.053287 |
| 0.16 | 0.181700 | 0.295946 | 0.362269 | 0.515647 | 0.650002 | 0.809303 | 0.934443 | 1.080711 |
| 0.259998 | 0.185751 | 0.302425 | 0.370317 | 0.530438 | 0.661619 | 0.828133 | 0.961193 | 1.105441 |
| 0.359997 | 0.191258 | 0.311034 | 0.382826 | 0.541698 | 0.680735 | 0.856540 | 0.984024 | 1.134901 |
| 0.459999 | 0.197247 | 0.321957 | 0.395056 | 0.560272 | 0.705507 | 0.883369 | 1.025583 | 1.178908 |
| 0.559998 | 0.205073 | 0.333218 | 0.410390 | 0.579945 | 0.730603 | 0.918414 | 1.058722 | 1.218425 |
| 0.66 | 0.211909 | 0.345120 | 0.423884 | 0.602224 | 0.757002 | 0.953742 | 1.100428 | 1.268848 |
| 0.759998 | 0.219275 | 0.358847 | 0.440164 | 0.628068 | 0.788129 | 0.989886 | 1.134714 | 1.314228 |
| 0.859997 | 0.228737 | 0.371999 | 0.455557 | 0.653390 | 0.812799 | 1.024239 | 1.183765 | 1.368455 |
| 0.959999 | 0.236285 | 0.385710 | 0.475768 | 0.677242 | 0.843267 | 1.057618 | 1.222998 | 1.416406 |
| 1.06 | 0.244976 | 0.397548 | 0.490920 | 0.698471 | 0.873877 | 1.100437 | 1.266276 | 1.459412 |
| 1.16 | 0.254270 | 0.413218 | 0.510351 | 0.725393 | 0.909758 | 1.138177 | 1.313571 | 1.515705 |
| 1.26 | 0.261778 | 0.426143 | 0.526519 | 0.750034 | 0.943527 | 1.175664 | 1.363272 | 1.567225 |
| 1.36 | 0.271070 | 0.440230 | 0.546708 | 0.772111 | 0.969892 | 1.219896 | 1.409712 | 1.625046 |
| 1.46 | 0.279626 | 0.454953 | 0.560681 | 0.797131 | 1.007677 | 1.261946 | 1.450644 | 1.675472 |
| 1.56 | 0.288834 | 0.473061 | 0.578537 | 0.825531 | 1.034534 | 1.297549 | 1.497649 | 1.728616 |
| 1.66 | 0.299309 | 0.486228 | 0.597570 | 0.853131 | 1.064157 | 1.337601 | 1.553146 | 1.778958 |
| 1.76 | 0.306512 | 0.502699 | 0.618774 | 0.873959 | 1.098691 | 1.374982 | 1.588326 | 1.830474 |
| 1.86 | 0.316949 | 0.517335 | 0.635244 | 0.905033 | 1.133902 | 1.414369 | 1.634241 | 1.893367 |
| 1.96 | 0.325392 | 0.528291 | 0.650616 | 0.929081 | 1.162494 | 1.464600 | 1.688971 | 1.941841 |
| 2.06 | 0.333729 | 0.544750 | 0.669692 | 0.954686 | 1.199211 | 1.495493 | 1.739307 | 1.992214 |
| 2.16 | 0.343822 | 0.559891 | 0.688492 | 0.978137 | 1.230384 | 1.548741 | 1.780755 | 2.051517 |
| 2.26 | 0.353899 | 0.576767 | 0.708929 | 1.005040 | 1.257939 | 1.585036 | 1.825372 | 2.110050 |
| 2.36 | 0.361653 | 0.587382 | 0.725330 | 1.032168 | 1.292964 | 1.622144 | 1.870687 | 2.170216 |
| 2.46 | 0.370751 | 0.606016 | 0.741471 | 1.059597 | 1.329507 | 1.672726 | 1.915560 | 2.212971 |
| 2.56 | 0.379437 | 0.619454 | 0.759523 | 1.088856 | 1.357625 | 1.705060 | 1.975713 | 2.271195 |
| 2.66 | 0.388984 | 0.635848 | 0.778164 | 1.107808 | 1.392118 | 1.748613 | 2.017554 | 2.327933 |
| 2.76 | 0.397685 | 0.649084 | 0.800420 | 1.139893 | 1.421438 | 1.790059 | 2.061245 | 2.390036 |
| 2.86 | 0.409281 | 0.665791 | 0.817036 | 1.157367 | 1.452502 | 1.835163 | 2.108827 | 2.428601 |
| 2.96 | 0.416289 | 0.680563 | 0.837083 | 1.185039 | 1.493884 | 1.870523 | 2.156601 | 2.494688 |
| 3.06 | 0.426838 | 0.689814 | 0.851806 | 1.217957 | 1.527269 | 1.915179 | 2.197435 | 2.531507 |
| 3.16 | 0.433410 | 0.707513 | 0.873355 | 1.236081 | 1.556758 | 1.953992 | 2.253795 | 2.591289 |
| 3.26 | 0.445395 | 0.720881 | 0.886064 | 1.262669 | 1.589282 | 1.997301 | 2.304474 | 2.656469 |
| 3.36 | 0.451721 | 0.736072 | 0.905403 | 1.292403 | 1.613204 | 2.025906 | 2.335283 | 2.694543 |
| 3.46 | 0.462941 | 0.753676 | 0.925887 | 1.311178 | 1.654515 | 2.078330 | 2.390224 | 2.746484 |
| 3.56 | 0.468920 | 0.765350 | 0.947017 | 1.345318 | 1.683852 | 2.105312 | 2.435620 | 2.809579 |
| 3.66 | 0.479858 | 0.777223 | 0.958021 | 1.369122 | 1.711034 | 2.141594 | 2.491624 | 2.871888 |
| 3.76 | 0.487699 | 0.792170 | 0.982650 | 1.397685 | 1.741423 | 2.189968 | 2.540519 | 2.918661 |
| 3.86 | 0.498241 | 0.807347 | 0.999787 | 1.412171 | 1.772569 | 2.235249 | 2.579396 | 2.958730 |
| 3.96 | 0.507921 | 0.825219 | 1.016439 | 1.448517 | 1.812430 | 2.279776 | 2.619834 | 3.027611 |
| 4.06 | 0.516399 | 0.841267 | 1.036361 | 1.464565 | 1.835869 | 2.302644 | 2.657357 | 3.070190 |
| 4.16 | 0.521895 | 0.855936 | 1.047944 | 1.492926 | 1.866981 | 2.359570 | 2.725907 | 3.127307 |
| 4.26 | 0.530702 | 0.865592 | 1.069061 | 1.519356 | 1.898358 | 2.389209 | 2.758851 | 3.175917 |
| 4.36 | 0.539881 | 0.883728 | 1.085715 | 1.549558 | 1.929807 | 2.437359 | 2.809228 | 3.238867 |
| 4.46 | 0.549617 | 0.899489 | 1.103017 | 1.575807 | 1.976331 | 2.457139 | 2.847036 | 3.296425 |
| 4.56 | 0.559616 | 0.911725 | 1.121253 | 1.599067 | 1.996206 | 2.503181 | 2.889249 | 3.333860 |
| 4.66 | 0.569201 | 0.920029 | 1.138507 | 1.614731 | 2.037955 | 2.539950 | 2.946087 | 3.376839 |
| 4.76 | 0.574820 | 0.938233 | 1.153080 | 1.637904 | 2.063021 | 2.591415 | 2.995716 | 3.440374 |
| 4.86 | 0.583128 | 0.952617 | 1.175216 | 1.665155 | 2.100859 | 2.626299 | 3.033331 | 3.487866 |
| 4.96 | 0.593681 | 0.964338 | 1.194113 | 1.694746 | 2.123413 | 2.666131 | 3.071688 | 3.552641 |
| 5.06 | 0.601054 | 0.982807 | 1.212625 | 1.714660 | 2.162471 | 2.691224 | 3.122052 | 3.613822 |
| 5.16 | 0.612937 | 0.994071 | 1.229980 | 1.735601 | 2.186554 | 2.742509 | 3.165780 | 3.661471 |
| 5.26 | 0.617615 | 1.011587 | 1.247885 | 1.771316 | 2.219262 | 2.786554 | 3.212479 | 3.708756 |
| 5.36 | 0.627053 | 1.022956 | 1.257298 | 1.791382 | 2.243463 | 2.829148 | 3.264860 | 3.740953 |
| 5.46 | 0.638047 | 1.034527 | 1.273691 | 1.809487 | 2.281421 | 2.845253 | 3.284486 | 3.815558 |
| 5.56 | 0.645192 | 1.052657 | 1.297672 | 1.843074 | 2.300117 | 2.903848 | 3.343021 | 3.867876 |
| 5.66 | 0.651535 | 1.067336 | 1.312033 | 1.858201 | 2.338819 | 2.926538 | 3.373176 | 3.901764 |
| 5.76 | 0.664660 | 1.079609 | 1.323330 | 1.887835 | 2.378145 | 2.961506 | 3.439764 | 3.973819 |
| 5.86 | 0.668149 | 1.092385 | 1.341085 | 1.907121 | 2.393491 | 3.003321 | 3.481206 | 4.009497 |
| 5.96 | 0.679183 | 1.102969 | 1.365975 | 1.937122 | 2.419729 | 3.054534 | 3.525611 | 4.072333 |
| 6.06 | 0.687264 | 1.122404 | 1.372999 | 1.966482 | 2.451533 | 3.082272 | 3.563864 | 4.125391 |
| 6.16 | 0.696059 | 1.134839 | 1.395337 | 1.984495 | 2.491157 | 3.109771 | 3.605647 | 4.154054 |
| 6.26 | 0.705816 | 1.151707 | 1.416229 | 2.008942 | 2.523664 | 3.163477 | 3.648683 | 4.222273 |
| 6.36 | 0.715862 | 1.157581 | 1.423727 | 2.025943 | 2.553326 | 3.196282 | 3.703336 | 4.256952 |
| 6.46 | 0.721374 | 1.174246 | 1.446357 | 2.059761 | 2.578043 | 3.230794 | 3.728110 | 4.306708 |
| 6.56 | 0.730478 | 1.188914 | 1.463987 | 2.088040 | 2.606503 | 3.279050 | 3.778522 | 4.358659 |
| 6.66 | 0.738498 | 1.200765 | 1.481630 | 2.107096 | 2.641610 | 3.324748 | 3.822212 | 4.410730 |
| 6.76 | 0.745276 | 1.215069 | 1.501532 | 2.121931 | 2.676431 | 3.346452 | 3.856801 | 4.476575 |
| 6.86 | 0.757949 | 1.227119 | 1.508015 | 2.149584 | 2.690842 | 3.396327 | 3.900451 | 4.489802 |
| 6.96 | 0.764225 | 1.241227 | 1.528811 | 2.173086 | 2.739517 | 3.431584 | 3.950055 | 4.569546 |
| 7.06 | 0.771145 | 1.252825 | 1.552250 | 2.200316 | 2.757324 | 3.467003 | 4.006208 | 4.598328 |
| 7.16 | 0.776985 | 1.265860 | 1.569559 | 2.223156 | 2.794123 | 3.501197 | 4.020998 | 4.636588 |
| 7.26 | 0.785130 | 1.285815 | 1.573627 | 2.252217 | 2.809535 | 3.541480 | 4.092297 | 4.700415 |
| 7.36 | 0.794461 | 1.299497 | 1.597416 | 2.264800 | 2.833679 | 3.557009 | 4.130060 | 4.770886 |
| 7.46 | 0.805552 | 1.310083 | 1.609176 | 2.296779 | 2.866327 | 3.620959 | 4.171470 | 4.785520 |
| 7.56 | 0.812178 | 1.326567 | 1.630488 | 2.323554 | 2.899886 | 3.657826 | 4.203263 | 4.833730 |
| 7.66 | 0.822565 | 1.329045 | 1.642825 | 2.342020 | 2.941270 | 3.687319 | 4.259462 | 4.879410 |
| 7.76 | 0.825188 | 1.351037 | 1.656548 | 2.367835 | 2.962943 | 3.715216 | 4.287512 | 4.941678 |
| 7.86 | 0.837852 | 1.362968 | 1.671752 | 2.393283 | 3.000106 | 3.748743 | 4.317332 | 4.980357 |
| 7.96 | 0.846156 | 1.369083 | 1.692186 | 2.411356 | 3.017041 | 3.791776 | 4.377990 | 5.033733 |
| 8.06 | 0.856110 | 1.386437 | 1.704749 | 2.424037 | 3.046643 | 3.808235 | 4.434329 | 5.076270 |
| 8.16 | 0.861548 | 1.394376 | 1.727691 | 2.461130 | 3.086900 | 3.861394 | 4.440164 | 5.146546 |
| 8.26 | 0.870678 | 1.409305 | 1.738774 | 2.473507 | 3.118259 | 3.890960 | 4.518357 | 5.203880 |
| 8.36 | 0.876306 | 1.424126 | 1.761343 | 2.499585 | 3.125398 | 3.942222 | 4.536068 | 5.239069 |
| 8.46 | 0.884199 | 1.444215 | 1.774777 | 2.529244 | 3.158498 | 3.966682 | 4.567800 | 5.288981 |
| 8.56 | 0.895906 | 1.445843 | 1.794809 | 2.552798 | 3.197409 | 4.001629 | 4.616556 | 5.315849 |
| 8.66 | 0.899416 | 1.470907 | 1.812248 | 2.574523 | 3.214289 | 4.047779 | 4.643566 | 5.362878 |
| 8.76 | 0.911060 | 1.472334 | 1.821827 | 2.593261 | 3.235340 | 4.065890 | 4.721722 | 5.419650 |
| 8.86 | 0.917382 | 1.494833 | 1.839340 | 2.605913 | 3.274187 | 4.109241 | 4.726518 | 5.474295 |
| 8.96 | 0.920596 | 1.505700 | 1.854534 | 2.640979 | 3.296973 | 4.141338 | 4.792274 | 5.524901 |
| 9.06 | 0.931209 | 1.509806 | 1.861471 | 2.665597 | 3.327032 | 4.168302 | 4.819008 | 5.569708 |
| 9.16 | 0.939678 | 1.522820 | 1.890387 | 2.676407 | 3.360833 | 4.212504 | 4.851465 | 5.618237 |
| 9.26 | 0.944552 | 1.544185 | 1.892107 | 2.708831 | 3.401037 | 4.254186 | 4.895622 | 5.678178 |
| 9.36 | 0.954187 | 1.552907 | 1.911395 | 2.730787 | 3.404190 | 4.265750 | 4.933204 | 5.690083 |
| 9.46 | 0.965015 | 1.563944 | 1.928352 | 2.746440 | 3.440405 | 4.310729 | 4.989658 | 5.756010 |
| 9.56 | 0.971878 | 1.575112 | 1.951051 | 2.762064 | 3.469942 | 4.352177 | 5.048558 | 5.776112 |
| 9.66 | 0.982027 | 1.590266 | 1.966064 | 2.783890 | 3.502063 | 4.383380 | 5.061577 | 5.837697 |
| 9.76 | 0.983897 | 1.599817 | 1.974878 | 2.819315 | 3.541341 | 4.421608 | 5.105575 | 5.908083 |
| 9.86 | 0.993274 | 1.611548 | 1.990420 | 2.821162 | 3.562017 | 4.454972 | 5.152896 | 5.922366 |
| 9.96 | 0.999284 | 1.630213 | 2.005782 | 2.855064 | 3.580184 | 4.471251 | 5.193125 | 5.969264 |
| 10.06 | 1.008777 | 1.645928 | 2.028844 | 2.872392 | 3.623075 | 4.535386 | 5.243894 | 6.044473 |
| 10.16 | 1.016464 | 1.647466 | 2.032803 | 2.904150 | 3.621643 | 4.550696 | 5.283231 | 6.073150 |
| 10.26 | 1.019872 | 1.661066 | 2.060261 | 2.913564 | 3.662230 | 4.610079 | 5.322232 | 6.132589 |
| 10.36 | 1.029660 | 1.673932 | 2.060889 | 2.942959 | 3.676044 | 4.621019 | 5.357974 | 6.176988 |
| 10.46 | 1.040769 | 1.687800 | 2.090968 | 2.974184 | 3.716249 | 4.645878 | 5.396802 | 6.233389 |
| 10.56 | 1.043361 | 1.703092 | 2.102564 | 2.973136 | 3.732519 | 4.699747 | 5.406809 | 6.263123 |
| 10.66 | 1.056366 | 1.719047 | 2.118541 | 3.018429 | 3.754911 | 4.742355 | 5.476824 | 6.292474 |
| 10.76 | 1.065315 | 1.728799 | 2.133089 | 3.023139 | 3.789565 | 4.756824 | 5.519882 | 6.321615 |
| 10.86 | 1.072276 | 1.746535 | 2.143657 | 3.045893 | 3.830931 | 4.783134 | 5.547918 | 6.378965 |
| 10.96 | 1.074868 | 1.749259 | 2.165861 | 3.072245 | 3.848860 | 4.826646 | 5.566206 | 6.458334 |
| 11.06 | 1.088975 | 1.771478 | 2.166755 | 3.079064 | 3.889618 | 4.856236 | 5.598955 | 6.471730 |
| 11.16 | 1.094324 | 1.770190 | 2.185138 | 3.115402 | 3.894667 | 4.913528 | 5.673917 | 6.515458 |
| 11.26 | 1.097276 | 1.787183 | 2.205107 | 3.139122 | 3.940729 | 4.909874 | 5.676411 | 6.556056 |
| 11.36 | 1.107546 | 1.793444 | 2.219775 | 3.140813 | 3.944247 | 4.966504 | 5.718923 | 6.600180 |
| 11.46 | 1.113574 | 1.811945 | 2.229981 | 3.183826 | 3.998893 | 5.009515 | 5.787730 | 6.650092 |
| 11.56 | 1.116603 | 1.818975 | 2.251808 | 3.195018 | 4.003416 | 5.047570 | 5.801419 | 6.716074 |
| 11.66 | 1.126362 | 1.837110 | 2.270636 | 3.229761 | 4.037852 | 5.074354 | 5.854809 | 6.725719 |
| 11.76 | 1.133938 | 1.845801 | 2.271179 | 3.247542 | 4.075499 | 5.076921 | 5.888888 | 6.768316 |
| 11.86 | 1.139047 | 1.861119 | 2.297003 | 3.258887 | 4.089295 | 5.122636 | 5.921067 | 6.832068 |
| 11.96 | 1.146141 | 1.873414 | 2.305475 | 3.267488 | 4.105522 | 5.168744 | 5.979998 | 6.858688 |
| 12.06 | 1.156727 | 1.887247 | 2.325630 | 3.295739 | 4.120289 | 5.180844 | 5.996671 | 6.912908 |
| 12.16 | 1.164333 | 1.886637 | 2.330614 | 3.332986 | 4.170336 | 5.231800 | 6.012578 | 6.953433 |
| 12.26 | 1.169653 | 1.898333 | 2.338869 | 3.341597 | 4.190199 | 5.260006 | 6.083225 | 7.015016 |
| 12.36 | 1.173742 | 1.910195 | 2.361548 | 3.363915 | 4.200278 | 5.304373 | 6.102493 | 7.049868 |
| 12.46 | 1.182899 | 1.921062 | 2.383648 | 3.374825 | 4.221813 | 5.293839 | 6.129554 | 7.089128 |
| 12.56 | 1.191064 | 1.942785 | 2.383456 | 3.390693 | 4.260875 | 5.367126 | 6.150268 | 7.106293 |
| 12.66 | 1.202971 | 1.959185 | 2.396968 | 3.409667 | 4.307072 | 5.390513 | 6.240207 | 7.157658 |
| 12.76 | 1.210340 | 1.956488 | 2.413060 | 3.435668 | 4.302610 | 5.421541 | 6.256509 | 7.195518 |
| 12.86 | 1.215108 | 1.980017 | 2.427748 | 3.455501 | 4.328451 | 5.451540 | 6.312926 | 7.277010 |
| 12.96 | 1.219837 | 1.986109 | 2.445183 | 3.473610 | 4.356220 | 5.496777 | 6.333091 | 7.313349 |
| 13.06 | 1.228720 | 1.990895 | 2.458505 | 3.508487 | 4.396037 | 5.529933 | 6.382031 | 7.330731 |
| 13.16 | 1.230227 | 2.008368 | 2.482400 | 3.525451 | 4.401617 | 5.548153 | 6.384577 | 7.406342 |
| 13.26 | 1.239120 | 2.021568 | 2.490163 | 3.534374 | 4.434374 | 5.562517 | 6.429151 | 7.416302 |
| 13.36 | 1.245866 | 2.039624 | 2.507054 | 3.564243 | 4.479691 | 5.593665 | 6.478419 | 7.482940 |
| 13.46 | 1.260290 | 2.038727 | 2.526813 | 3.573404 | 4.484282 | 5.637829 | 6.510680 | 7.527802 |
| 13.56 | 1.264555 | 2.053230 | 2.529424 | 3.588687 | 4.501968 | 5.657859 | 6.546910 | 7.552114 |
| 13.66 | 1.274270 | 2.058990 | 2.541405 | 3.623229 | 4.536620 | 5.681148 | 6.572818 | 7.599455 |
| 13.76 | 1.271898 | 2.079080 | 2.570344 | 3.652681 | 4.561606 | 5.749973 | 6.591108 | 7.599876 |
| 13.86 | 1.279407 | 2.080203 | 2.566790 | 3.674350 | 4.597774 | 5.771089 | 6.647744 | 7.637192 |
| 13.96 | 1.295764 | 2.107358 | 2.580847 | 3.693898 | 4.593664 | 5.792751 | 6.708430 | 7.729113 |
| 14.06 | 1.298862 | 2.110980 | 2.600657 | 3.682450 | 4.654821 | 5.821533 | 6.706203 | 7.753999 |
| 14.16 | 1.308078 | 2.126473 | 2.620480 | 3.718351 | 4.675767 | 5.821765 | 6.756173 | 7.753562 |
| 14.26 | 1.312302 | 2.142103 | 2.637308 | 3.735712 | 4.695366 | 5.881601 | 6.798896 | 7.855036 |
| 14.36 | 1.317029 | 2.144223 | 2.635345 | 3.749435 | 4.727657 | 5.921867 | 6.794809 | 7.895574 |
| 14.46 | 1.319114 | 2.149486 | 2.662658 | 3.783673 | 4.725753 | 5.949065 | 6.840102 | 7.934277 |
| 14.56 | 1.330737 | 2.173616 | 2.658704 | 3.782451 | 4.746264 | 5.969075 | 6.907441 | 7.943483 |
| 14.66 | 1.332342 | 2.173238 | 2.676097 | 3.810298 | 4.776283 | 6.010804 | 6.900383 | 7.979915 |
| 14.76 | 1.350400 | 2.192791 | 2.699227 | 3.828655 | 4.806215 | 6.035155 | 6.943598 | 7.997101 |
| 14.86 | 1.347707 | 2.189315 | 2.700180 | 3.838809 | 4.824968 | 6.085129 | 6.976949 | 8.103040 |
| 14.96 | 1.354193 | 2.216676 | 2.726026 | 3.861635 | 4.853188 | 6.111189 | 7.045033 | 8.138880 |
| 15.06 | 1.360707 | 2.223295 | 2.725671 | 3.895642 | 4.863310 | 6.144772 | 7.065295 | 8.160683 |
| 15.16 | 1.373258 | 2.223333 | 2.755731 | 3.922303 | 4.887752 | 6.126727 | 7.070763 | 8.189919 |
| 15.26 | 1.375961 | 2.235331 | 2.770838 | 3.940822 | 4.935753 | 6.173091 | 7.117354 | 8.223474 |
| 15.36 | 1.386880 | 2.242413 | 2.779497 | 3.929570 | 4.956020 | 6.179717 | 7.172126 | 8.294418 |
| 15.46 | 1.387470 | 2.257147 | 2.776825 | 3.949707 | 4.976164 | 6.255046 | 7.178651 | 8.272957 |
| 15.56 | 1.398630 | 2.268678 | 2.797381 | 3.990146 | 4.993360 | 6.263155 | 7.206713 | 8.309810 |
| 15.66 | 1.402507 | 2.285047 | 2.816045 | 4.016000 | 5.034786 | 6.305461 | 7.244720 | 8.369106 |
| 15.76 | 1.407059 | 2.287464 | 2.823129 | 4.008780 | 5.029331 | 6.350195 | 7.296449 | 8.453444 |
| 15.86 | 1.422066 | 2.297409 | 2.837397 | 4.023372 | 5.046809 | 6.378470 | 7.331082 | 8.439354 |
| 15.96 | 1.424018 | 2.318329 | 2.860948 | 4.051095 | 5.077953 | 6.385753 | 7.395041 | 8.492834 |
| 16.06 | 1.432359 | 2.317337 | 2.860837 | 4.068438 | 5.094675 | 6.417891 | 7.379808 | 8.558931 |
| 16.16 | 1.431602 | 2.336076 | 2.885619 | 4.095747 | 5.156328 | 6.460699 | 7.470068 | 8.613731 |
| 16.26 | 1.443013 | 2.338757 | 2.884869 | 4.110737 | 5.177927 | 6.493467 | 7.491414 | 8.586427 |
| 16.36 | 1.449030 | 2.356750 | 2.907794 | 4.119564 | 5.162767 | 6.496271 | 7.489194 | 8.626435 |
| 16.46 | 1.460970 | 2.373544 | 2.907732 | 4.140697 | 5.181771 | 6.543811 | 7.533838 | 8.709215 |
| 16.56 | 1.462707 | 2.369029 | 2.921604 | 4.176488 | 5.217556 | 6.528676 | 7.571143 | 8.724497 |
| 16.66 | 1.464814 | 2.385006 | 2.940620 | 4.180949 | 5.257455 | 6.577631 | 7.588982 | 8.738290 |
| 16.76 | 1.475554 | 2.391561 | 2.946337 | 4.221758 | 5.289009 | 6.638072 | 7.668239 | 8.823807 |
| 16.86 | 1.486061 | 2.412171 | 2.968277 | 4.223098 | 5.293502 | 6.641799 | 7.659992 | 8.819182 |
| 16.96 | 1.487959 | 2.419905 | 2.983144 | 4.254948 | 5.309771 | 6.649447 | 7.681939 | 8.860422 |
| 17.06 | 1.491376 | 2.424156 | 2.982651 | 4.263374 | 5.335818 | 6.690316 | 7.750863 | 8.954212 |
| 17.16 | 1.500402 | 2.444477 | 3.002712 | 4.281090 | 5.361398 | 6.733450 | 7.768027 | 8.985957 |
| 17.26 | 1.500240 | 2.445152 | 3.022120 | 4.280146 | 5.399196 | 6.751678 | 7.823522 | 8.992181 |
| 17.36 | 1.508327 | 2.460404 | 3.033662 | 4.316985 | 5.411407 | 6.799360 | 7.856325 | 9.030235 |
| 17.46 | 1.524673 | 2.463007 | 3.032273 | 4.345486 | 5.420009 | 6.829572 | 7.867962 | 9.103799 |
| 17.56 | 1.520797 | 2.474664 | 3.050408 | 4.359736 | 5.461742 | 6.839199 | 7.925099 | 9.119908 |
| 17.66 | 1.533987 | 2.498188 | 3.065091 | 4.384204 | 5.484518 | 6.879386 | 7.925434 | 9.149259 |
| 17.76 | 1.542379 | 2.497920 | 3.076646 | 4.369848 | 5.494523 | 6.868160 | 7.940808 | 9.158284 |
| 17.86 | 1.542481 | 2.522392 | 3.094945 | 4.395504 | 5.533930 | 6.903859 | 7.966560 | 9.230845 |
| 17.96 | 1.552552 | 2.526867 | 3.100729 | 4.415082 | 5.542770 | 6.923454 | 8.056642 | 9.233441 |
| 18.06 | 1.562712 | 2.528734 | 3.106519 | 4.431768 | 5.544472 | 6.961634 | 8.036288 | 9.283259 |
| 18.16 | 1.568986 | 2.549981 | 3.136349 | 4.462376 | 5.591835 | 7.020630 | 8.070370 | 9.329947 |
| 18.26 | 1.562303 | 2.561451 | 3.156527 | 4.480897 | 5.607169 | 7.057493 | 8.108026 | 9.324578 |
| 18.36 | 1.571032 | 2.566110 | 3.154832 | 4.485564 | 5.642137 | 7.053397 | 8.127201 | 9.436750 |
| 18.46 | 1.580440 | 2.576254 | 3.160440 | 4.491927 | 5.634994 | 7.091520 | 8.197193 | 9.477994 |
| 18.56 | 1.589205 | 2.587808 | 3.174683 | 4.539279 | 5.666526 | 7.144240 | 8.201471 | 9.490021 |
| 18.66 | 1.592884 | 2.582054 | 3.197452 | 4.549784 | 5.688852 | 7.168244 | 8.234779 | 9.483706 |
| 18.76 | 1.596409 | 2.609812 | 3.214161 | 4.557146 | 5.695153 | 7.179015 | 8.269260 | 9.585201 |
| 18.86 | 1.602468 | 2.615627 | 3.226473 | 4.563233 | 5.738273 | 7.171702 | 8.275157 | 9.595632 |
| 18.96 | 1.605380 | 2.625067 | 3.232028 | 4.606106 | 5.773255 | 7.237061 | 8.305932 | 9.604056 |
| 19.06 | 1.615081 | 2.626127 | 3.234690 | 4.595549 | 5.773307 | 7.252253 | 8.384989 | 9.628651 |
| 19.16 | 1.618550 | 2.633247 | 3.260889 | 4.641735 | 5.792969 | 7.296809 | 8.426076 | 9.716536 |
| 19.26 | 1.627830 | 2.655294 | 3.274903 | 4.648538 | 5.801967 | 7.301119 | 8.418003 | 9.749619 |
| 19.36 | 1.640765 | 2.655857 | 3.289934 | 4.654101 | 5.859679 | 7.317641 | 8.469258 | 9.781518 |
| 19.46 | 1.640187 | 2.659150 | 3.287092 | 4.666659 | 5.860414 | 7.339915 | 8.494577 | 9.808158 |
| 19.56 | 1.646389 | 2.675909 | 3.301600 | 4.685038 | 5.870269 | 7.402866 | 8.514805 | 9.817684 |
| 19.66 | 1.654890 | 2.693812 | 3.312105 | 4.715425 | 5.883824 | 7.374899 | 8.554263 | 9.896450 |
| 19.76 | 1.661230 | 2.693170 | 3.332495 | 4.726050 | 5.939476 | 7.430219 | 8.612673 | 9.938419 |
| 19.86 | 1.665419 | 2.702686 | 3.335123 | 4.756601 | 5.973527 | 7.469622 | 8.610269 | 9.959056 |
| 19.96 | 1.669356 | 2.709969 | 3.359854 | 4.742236 | 5.955082 | 7.468035 | 8.684486 | 9.946614 |
| 20.06 | 1.677842 | 2.730571 | 3.353690 | 4.785130 | 5.982387 | 7.540055 | 8.698300 | 10.021192 |
| 20.16 | 1.687750 | 2.730037 | 3.370328 | 4.794173 | 5.996510 | 7.563055 | 8.715538 | 10.003540 |
| 20.26 | 1.687966 | 2.751257 | 3.380109 | 4.799037 | 6.028452 | 7.561389 | 8.771139 | 10.099874 |
| 20.36 | 1.699301 | 2.754427 | 3.389171 | 4.805781 | 6.042431 | 7.565388 | 8.777804 | 10.126560 |
| 20.46 | 1.696578 | 2.773768 | 3.409045 | 4.825272 | 6.064986 | 7.648553 | 8.814110 | 10.150213 |
| 20.56 | 1.709563 | 2.764055 | 3.406941 | 4.843348 | 6.074013 | 7.654986 | 8.821101 | 10.135264 |
| 20.66 | 1.705486 | 2.778403 | 3.441880 | 4.865644 | 6.128559 | 7.638725 | 8.866715 | 10.249350 |
| 20.76 | 1.713744 | 2.803381 | 3.439522 | 4.886047 | 6.134774 | 7.672667 | 8.923076 | 10.278096 |
| 20.86 | 1.715438 | 2.800678 | 3.455628 | 4.894994 | 6.130627 | 7.751271 | 8.930795 | 10.305711 |
| 20.96 | 1.725616 | 2.821708 | 3.458484 | 4.915756 | 6.167884 | 7.775441 | 8.929843 | 10.335663 |
| 21.06 | 1.732014 | 2.809058 | 3.475297 | 4.955788 | 6.207442 | 7.757101 | 9.006487 | 10.382059 |
| 21.16 | 1.745696 | 2.823657 | 3.491870 | 4.960167 | 6.216268 | 7.823791 | 8.983535 | 10.346650 |
| 21.26 | 1.738534 | 2.848959 | 3.483290 | 4.977992 | 6.261791 | 7.835849 | 9.028415 | 10.430743 |
| 21.36 | 1.757193 | 2.840072 | 3.506191 | 4.997522 | 6.236019 | 7.822113 | 9.079354 | 10.455153 |
| 21.46 | 1.753149 | 2.848913 | 3.504640 | 4.997963 | 6.263741 | 7.897506 | 9.090707 | 10.446072 |
| 21.56 | 1.766917 | 2.857996 | 3.528406 | 5.040983 | 6.272520 | 7.869387 | 9.089640 | 10.510987 |
| 21.66 | 1.769683 | 2.880340 | 3.542628 | 5.047103 | 6.302527 | 7.926146 | 9.148136 | 10.520250 |
| 21.76 | 1.770288 | 2.872610 | 3.556647 | 5.039012 | 6.324546 | 7.954153 | 9.209397 | 10.618924 |
| 21.86 | 1.783862 | 2.899423 | 3.554733 | 5.086304 | 6.377278 | 7.949659 | 9.197026 | 10.599510 |
| 21.96 | 1.789149 | 2.912686 | 3.583876 | 5.089985 | 6.385142 | 8.023725 | 9.236708 | 10.620721 |
| 22.06 | 1.795767 | 2.901595 | 3.590134 | 5.109346 | 6.401437 | 7.988288 | 9.250956 | 10.664196 |
| 22.16 | 1.795705 | 2.914382 | 3.596698 | 5.107853 | 6.437772 | 8.075012 | 9.299983 | 10.726163 |
| 22.26 | 1.798017 | 2.936071 | 3.600511 | 5.127032 | 6.462010 | 8.040390 | 9.354127 | 10.721179 |
| 22.36 | 1.808044 | 2.948356 | 3.606313 | 5.126405 | 6.465092 | 8.108390 | 9.380720 | 10.793247 |
| 22.46 | 1.802514 | 2.939941 | 3.615073 | 5.165781 | 6.485591 | 8.111073 | 9.366998 | 10.817053 |
| 22.56 | 1.815140 | 2.948721 | 3.644936 | 5.155327 | 6.509825 | 8.144799 | 9.362777 | 10.840416 |
| 22.66 | 1.817642 | 2.965709 | 3.648010 | 5.214261 | 6.499019 | 8.157981 | 9.389468 | 10.838099 |
| 22.76 | 1.819210 | 2.973351 | 3.671893 | 5.211247 | 6.504860 | 8.203684 | 9.437139 | 10.929290 |
| 22.86 | 1.830418 | 2.977583 | 3.685402 | 5.235081 | 6.576152 | 8.224661 | 9.514696 | 10.971430 |
| 22.96 | 1.831156 | 2.995645 | 3.696281 | 5.216443 | 6.556689 | 8.239869 | 9.497705 | 11.005278 |
| 23.06 | 1.847683 | 2.986508 | 3.697161 | 5.260665 | 6.582039 | 8.243141 | 9.502000 | 11.050189 |
| 23.16 | 1.851235 | 2.995827 | 3.691198 | 5.254995 | 6.623680 | 8.282797 | 9.540886 | 11.030435 |
| 23.26 | 1.849021 | 3.003694 | 3.715843 | 5.264155 | 6.606444 | 8.275687 | 9.599467 | 11.023600 |
| 23.36 | 1.866412 | 3.028347 | 3.721999 | 5.288444 | 6.642596 | 8.299480 | 9.667127 | 11.124176 |
| 23.46 | 1.862605 | 3.045028 | 3.727411 | 5.321261 | 6.666729 | 8.368973 | 9.663871 | 11.148825 |
| 23.56 | 1.863872 | 3.036518 | 3.751995 | 5.337993 | 6.710028 | 8.370084 | 9.683486 | 11.142521 |
| 23.66 | 1.866264 | 3.062854 | 3.768188 | 5.332865 | 6.719805 | 8.428765 | 9.712983 | 11.147384 |
| 23.76 | 1.881228 | 3.055512 | 3.764866 | 5.349878 | 6.697122 | 8.402391 | 9.745900 | 11.206514 |
| 23.86 | 1.887523 | 3.057202 | 3.775131 | 5.396669 | 6.710414 | 8.467451 | 9.729582 | 11.249377 |
| 23.96 | 1.883583 | 3.072562 | 3.777536 | 5.372287 | 6.732451 | 8.500411 | 9.749473 | 11.300280 |
| 24.06 | 1.896256 | 3.088624 | 3.784764 | 5.383942 | 6.796073 | 8.503827 | 9.808404 | 11.288574 |
| 24.16 | 1.896631 | 3.086143 | 3.819716 | 5.423033 | 6.777248 | 8.490601 | 9.861289 | 11.364756 |
| 24.26 | 1.901463 | 3.105403 | 3.804462 | 5.447451 | 6.821074 | 8.569002 | 9.843138 | 11.366832 |
| 24.36 | 1.916201 | 3.109807 | 3.845550 | 5.443669 | 6.820102 | 8.557880 | 9.938504 | 11.392775 |
| 24.46 | 1.915747 | 3.106039 | 3.844797 | 5.451217 | 6.853725 | 8.617342 | 9.950078 | 11.482602 |
| 24.56 | 1.920334 | 3.120363 | 3.845872 | 5.460277 | 6.845733 | 8.590659 | 9.939063 | 11.423677 |
| 24.66 | 1.928847 | 3.138573 | 3.879298 | 5.469305 | 6.859402 | 8.605746 | 9.980206 | 11.526016 |
| 24.76 | 1.927542 | 3.136569 | 3.869915 | 5.520694 | 6.907379 | 8.687840 | 9.971699 | 11.543408 |
| 24.86 | 1.934074 | 3.149619 | 3.886533 | 5.520797 | 6.939614 | 8.717129 | 10.036046 | 11.527350 |
| 24.96 | 1.943613 | 3.151448 | 3.898850 | 5.527220 | 6.961965 | 8.676919 | 10.094630 | 11.640746 |
| 25.06 | 1.948126 | 3.157087 | 3.918602 | 5.543774 | 6.943649 | 8.696414 | 10.038151 | 11.625657 |
| 25.16 | 1.960759 | 3.184719 | 3.917455 | 5.560564 | 7.003321 | 8.715226 | 10.075901 | 11.672472 |
| 25.26 | 1.960393 | 3.194881 | 3.935819 | 5.559681 | 7.005202 | 8.764607 | 10.172314 | 11.729512 |
| 25.36 | 1.967420 | 3.197062 | 3.942208 | 5.598079 | 7.037013 | 8.831419 | 10.178292 | 11.730143 |
| 25.46 | 1.962275 | 3.205906 | 3.958038 | 5.622330 | 7.025837 | 8.811917 | 10.226154 | 11.780405 |
| 25.56 | 1.980398 | 3.197968 | 3.945397 | 5.599109 | 7.029671 | 8.872104 | 10.170946 | 11.743462 |
| 25.66 | 1.973509 | 3.224357 | 3.978999 | 5.633857 | 7.038012 | 8.841718 | 10.243663 | 11.794317 |
| 25.76 | 1.987191 | 3.227052 | 3.963740 | 5.645549 | 7.079785 | 8.891244 | 10.307226 | 11.847138 |
| 25.86 | 1.986438 | 3.226134 | 3.966866 | 5.681996 | 7.131887 | 8.937350 | 10.329785 | 11.854461 |
| 25.96 | 1.986417 | 3.231665 | 3.992516 | 5.702159 | 7.147579 | 8.904592 | 10.316712 | 11.896954 |
| 26.06 | 2.000671 | 3.239038 | 4.012597 | 5.700668 | 7.163299 | 8.973488 | 10.331110 | 11.881503 |
| 26.16 | 2.006761 | 3.261765 | 4.030606 | 5.702431 | 7.187796 | 8.998473 | 10.325551 | 11.982239 |
| 26.26 | 2.000585 | 3.255009 | 4.010735 | 5.698428 | 7.172932 | 8.971454 | 10.362424 | 12.019554 |
| 26.36 | 2.006275 | 3.262159 | 4.050278 | 5.760644 | 7.210391 | 9.001159 | 10.434900 | 12.067498 |
| 26.46 | 2.013006 | 3.270184 | 4.043289 | 5.748002 | 7.219799 | 9.013076 | 10.474390 | 12.038883 |
| 26.56 | 2.025535 | 3.278618 | 4.068022 | 5.772431 | 7.213528 | 9.074657 | 10.515924 | 12.025543 |
| 26.66 | 2.034697 | 3.312148 | 4.045446 | 5.770822 | 7.254135 | 9.058463 | 10.538340 | 12.125520 |
| 26.76 | 2.035437 | 3.300878 | 4.066334 | 5.778348 | 7.257622 | 9.103059 | 10.494297 | 12.113280 |
| 26.86 | 2.039358 | 3.325808 | 4.072062 | 5.814908 | 7.275028 | 9.132298 | 10.579095 | 12.199589 |
| 26.96 | 2.035549 | 3.323593 | 4.101361 | 5.837134 | 7.267021 | 9.174388 | 10.611597 | 12.186805 |
| 27.06 | 2.054221 | 3.342294 | 4.104674 | 5.836631 | 7.343409 | 9.148610 | 10.555612 | 12.195736 |
| 27.16 | 2.051412 | 3.336792 | 4.115881 | 5.838032 | 7.356353 | 9.156663 | 10.628607 | 12.248731 |
| 27.26 | 2.057633 | 3.357486 | 4.104881 | 5.862716 | 7.340910 | 9.243993 | 10.643207 | 12.256897 |
| 27.36 | 2.063353 | 3.354776 | 4.133692 | 5.874608 | 7.370667 | 9.261395 | 10.677399 | 12.297557 |
| 27.46 | 2.060884 | 3.365462 | 4.151359 | 5.892115 | 7.356682 | 9.258333 | 10.685786 | 12.307899 |
| 27.56 | 2.079650 | 3.363458 | 4.166865 | 5.920064 | 7.427848 | 9.272109 | 10.748535 | 12.411327 |
| 27.66 | 2.078440 | 3.382158 | 4.143774 | 5.889124 | 7.428558 | 9.330041 | 10.705953 | 12.357251 |
| 27.76 | 2.079290 | 3.372362 | 4.182585 | 5.928133 | 7.442393 | 9.306358 | 10.791379 | 12.461557 |
| 27.86 | 2.076278 | 3.392197 | 4.169897 | 5.917226 | 7.465792 | 9.323362 | 10.836426 | 12.446619 |
| 27.96 | 2.083114 | 3.412983 | 4.175372 | 5.970616 | 7.500432 | 9.338571 | 10.826263 | 12.449147 |
| 28.06 | 2.086020 | 3.399357 | 4.190381 | 5.979838 | 7.499233 | 9.375637 | 10.890942 | 12.497383 |
| 28.16 | 2.099652 | 3.401430 | 4.218192 | 5.994098 | 7.489832 | 9.413391 | 10.823768 | 12.568143 |
| 28.26 | 2.109694 | 3.411572 | 4.213805 | 5.998360 | 7.539327 | 9.432017 | 10.909211 | 12.525611 |
| 28.36 | 2.112324 | 3.432239 | 4.209122 | 6.008338 | 7.538608 | 9.476791 | 10.951060 | 12.577215 |
| 28.46 | 2.119574 | 3.443000 | 4.239913 | 6.020553 | 7.543961 | 9.497416 | 10.988325 | 12.658048 |
| 28.56 | 2.116085 | 3.449946 | 4.242657 | 6.051930 | 7.542965 | 9.462859 | 10.977249 | 12.659660 |
| 28.66 | 2.124681 | 3.450568 | 4.248117 | 6.035092 | 7.563942 | 9.518288 | 10.972655 | 12.639178 |
| 28.76 | 2.118328 | 3.456350 | 4.271636 | 6.060050 | 7.621047 | 9.502183 | 11.015732 | 12.659054 |
| 28.86 | 2.131052 | 3.471128 | 4.291879 | 6.074513 | 7.646058 | 9.524944 | 11.008457 | 12.778387 |
| 28.96 | 2.136415 | 3.485634 | 4.281511 | 6.075020 | 7.650441 | 9.589530 | 11.041632 | 12.707305 |
| 29.06 | 2.140987 | 3.473648 | 4.307187 | 6.089858 | 7.649592 | 9.576826 | 11.101460 | 12.760744 |
| 29.16 | 2.139506 | 3.505899 | 4.314265 | 6.113971 | 7.650154 | 9.652060 | 11.088406 | 12.849559 |
| 29.26 | 2.155362 | 3.498410 | 4.321393 | 6.147678 | 7.656965 | 9.643945 | 11.164740 | 12.820958 |
| 29.36 | 2.148084 | 3.515270 | 4.327295 | 6.118457 | 7.733292 | 9.665738 | 11.179160 | 12.887106 |
| 29.46 | 2.160488 | 3.505188 | 4.340587 | 6.175027 | 7.706742 | 9.651631 | 11.189768 | 12.906262 |
| 29.56 | 2.160739 | 3.506142 | 4.323650 | 6.180590 | 7.738764 | 9.670398 | 11.202710 | 12.871284 |
| 29.66 | 2.166329 | 3.517860 | 4.365794 | 6.192083 | 7.757090 | 9.699253 | 11.233886 | 12.953065 |
| 29.76 | 2.177911 | 3.530811 | 4.375255 | 6.189775 | 7.768530 | 9.752324 | 11.286672 | 12.993282 |
| 29.86 | 2.186702 | 3.553041 | 4.375854 | 6.223215 | 7.756645 | 9.805590 | 11.234937 | 13.004140 |
| 29.96 | 2.187220 | 3.551639 | 4.374982 | 6.215923 | 7.808372 | 9.819746 | 11.276684 | 13.012306 |
| 30.06 | 2.191521 | 3.568932 | 4.381007 | 6.211718 | 7.802039 | 9.843495 | 11.272706 | 13.084326 |
| 30.16 | 2.200197 | 3.562131 | 4.398028 | 6.251700 | 7.864545 | 9.813627 | 11.347743 | 13.057778 |
| 30.26 | 2.186294 | 3.570517 | 4.384499 | 6.285388 | 7.872895 | 9.823911 | 11.332644 | 13.056705 |
| 30.36 | 2.194029 | 3.591218 | 4.413165 | 6.247597 | 7.858261 | 9.856776 | 11.416078 | 13.089881 |
| 30.46 | 2.210586 | 3.601633 | 4.415000 | 6.311935 | 7.862366 | 9.906287 | 11.455137 | 13.132778 |
| 30.56 | 2.203552 | 3.584418 | 4.441616 | 6.291984 | 7.898945 | 9.865237 | 11.396848 | 13.183610 |
| 30.66 | 2.215476 | 3.596878 | 4.437714 | 6.291395 | 7.894942 | 9.947116 | 11.507260 | 13.276511 |
| 30.76 | 2.211522 | 3.616123 | 4.445990 | 6.314774 | 7.942500 | 9.944120 | 11.498207 | 13.273201 |
| 30.86 | 2.225364 | 3.610702 | 4.466941 | 6.308892 | 7.977424 | 9.983345 | 11.548084 | 13.325783 |
| 30.96 | 2.236347 | 3.610002 | 4.456869 | 6.372101 | 7.975451 | 10.013693 | 11.492527 | 13.299629 |
| 31.06 | 2.238174 | 3.629096 | 4.474489 | 6.336232 | 7.992204 | 10.005847 | 11.545377 | 13.285760 |
| 31.16 | 2.242161 | 3.630449 | 4.479941 | 6.382360 | 7.996022 | 10.027286 | 11.591445 | 13.379012 |
| 31.26 | 2.245091 | 3.639680 | 4.479733 | 6.376151 | 8.035976 | 10.069878 | 11.571590 | 13.362704 |
| 31.36 | 2.234589 | 3.653214 | 4.498370 | 6.378165 | 8.047929 | 10.053263 | 11.590375 | 13.458684 |
| 31.46 | 2.239447 | 3.673795 | 4.514469 | 6.395967 | 8.048558 | 10.124834 | 11.694043 | 13.438589 |
| 31.56 | 2.246556 | 3.654317 | 4.498570 | 6.404957 | 8.090860 | 10.129153 | 11.713373 | 13.450910 |
| 31.66 | 2.264921 | 3.670497 | 4.518067 | 6.438441 | 8.037883 | 10.150870 | 11.652370 | 13.455359 |
| 31.76 | 2.264272 | 3.679399 | 4.533649 | 6.474658 | 8.057641 | 10.186717 | 11.722079 | 13.480298 |
| 31.86 | 2.262811 | 3.691045 | 4.538593 | 6.452173 | 8.112577 | 10.175462 | 11.720339 | 13.543456 |
| 31.96 | 2.261686 | 3.710594 | 4.551375 | 6.470161 | 8.101492 | 10.160028 | 11.712056 | 13.509840 |
| 32.06 | 2.277865 | 3.710491 | 4.558974 | 6.492046 | 8.105857 | 10.223935 | 11.803994 | 13.530566 |
| 32.16 | 2.278678 | 3.708015 | 4.549377 | 6.505185 | 8.130422 | 10.176343 | 11.827001 | 13.564988 |
| 32.26 | 2.275724 | 3.730993 | 4.588261 | 6.531242 | 8.151828 | 10.225107 | 11.861644 | 13.675670 |
| 32.36 | 2.297101 | 3.708319 | 4.577581 | 6.542833 | 8.206723 | 10.252769 | 11.838879 | 13.624220 |
| 32.46 | 2.295382 | 3.729094 | 4.611613 | 6.554602 | 8.216944 | 10.238834 | 11.875008 | 13.683935 |
| 32.56 | 2.302246 | 3.722747 | 4.597346 | 6.562633 | 8.210501 | 10.293344 | 11.880056 | 13.723314 |
| 32.66 | 2.298112 | 3.743092 | 4.597061 | 6.574413 | 8.254505 | 10.294521 | 11.879213 | 13.692032 |
| 32.76 | 2.312964 | 3.739370 | 4.625488 | 6.551370 | 8.226021 | 10.326448 | 11.970164 | 13.702934 |
| 32.86 | 2.304617 | 3.742037 | 4.642900 | 6.601339 | 8.220318 | 10.379691 | 11.910196 | 13.782185 |
| 32.96 | 2.311305 | 3.756877 | 4.632776 | 6.618538 | 8.253118 | 10.406051 | 11.986731 | 13.790430 |
| 33.06 | 2.310636 | 3.778210 | 4.634266 | 6.617691 | 8.299112 | 10.370528 | 12.004042 | 13.876848 |
| 33.16 | 2.330985 | 3.776558 | 4.652605 | 6.605687 | 8.328315 | 10.398084 | 11.993432 | 13.842629 |
| 33.26 | 2.325344 | 3.797264 | 4.657473 | 6.610977 | 8.281853 | 10.388435 | 12.018092 | 13.849224 |
| 33.36 | 2.338203 | 3.783112 | 4.688772 | 6.665868 | 8.365743 | 10.475397 | 12.097950 | 13.947867 |
| 33.46 | 2.331791 | 3.808882 | 4.662062 | 6.635743 | 8.326551 | 10.504313 | 12.032794 | 13.932193 |
| 33.56 | 2.330677 | 3.793624 | 4.692753 | 6.652719 | 8.384503 | 10.487204 | 12.100941 | 13.986995 |
| 33.66 | 2.343747 | 3.827727 | 4.710679 | 6.700453 | 8.389668 | 10.510746 | 12.157478 | 14.012682 |
| 33.76 | 2.352593 | 3.813820 | 4.723876 | 6.684339 | 8.373181 | 10.540144 | 12.141461 | 13.994459 |
| 33.86 | 2.352713 | 3.828594 | 4.726682 | 6.714233 | 8.417202 | 10.575509 | 12.194185 | 14.028891 |
| 33.96 | 2.365100 | 3.846241 | 4.706985 | 6.721771 | 8.429804 | 10.518183 | 12.216691 | 14.031911 |
| 34.06 | 2.353868 | 3.841525 | 4.727543 | 6.727442 | 8.423768 | 10.533920 | 12.241239 | 14.070672 |
| 34.16 | 2.361342 | 3.839148 | 4.748300 | 6.763355 | 8.415959 | 10.634958 | 12.260880 | 14.152704 |
| 34.26 | 2.362880 | 3.835535 | 4.737896 | 6.751545 | 8.476520 | 10.625842 | 12.212271 | 14.140132 |
| 34.36 | 2.373666 | 3.864891 | 4.763258 | 6.739407 | 8.464328 | 10.642219 | 12.239474 | 14.100892 |
| 34.46 | 2.364877 | 3.866288 | 4.767960 | 6.788726 | 8.495720 | 10.607565 | 12.265772 | 14.179603 |
| 34.56 | 2.389634 | 3.858833 | 4.787388 | 6.780784 | 8.506645 | 10.666264 | 12.310586 | 14.145061 |
| 34.66 | 2.387554 | 3.861869 | 4.757250 | 6.781443 | 8.545843 | 10.682911 | 12.314424 | 14.267461 |
| 34.76 | 2.380570 | 3.880939 | 4.802490 | 6.775272 | 8.568253 | 10.700781 | 12.376283 | 14.264202 |
| 34.86 | 2.400490 | 3.906482 | 4.803088 | 6.845379 | 8.554052 | 10.740183 | 12.377514 | 14.337351 |
| 34.96 | 2.391758 | 3.886143 | 4.810567 | 6.834608 | 8.587696 | 10.784166 | 12.418230 | 14.284380 |
| 35.06 | 2.409676 | 3.893410 | 4.817299 | 6.867886 | 8.567117 | 10.794730 | 12.404586 | 14.313789 |
| 35.16 | 2.398394 | 3.902299 | 4.837329 | 6.861534 | 8.622670 | 10.795153 | 12.493603 | 14.413795 |
| 35.26 | 2.407204 | 3.922075 | 4.846867 | 6.886653 | 8.585123 | 10.823641 | 12.465286 | 14.358514 |
| 35.36 | 2.402247 | 3.911321 | 4.843355 | 6.861800 | 8.620991 | 10.807102 | 12.505297 | 14.429297 |
| 35.46 | 2.405613 | 3.924776 | 4.836606 | 6.882258 | 8.640147 | 10.858844 | 12.498487 | 14.394296 |
| 35.56 | 2.410520 | 3.949404 | 4.844698 | 6.907921 | 8.643644 | 10.853119 | 12.502970 | 14.410634 |
| 35.66 | 2.413148 | 3.937970 | 4.863827 | 6.915133 | 8.637209 | 10.884144 | 12.564797 | 14.457813 |
| 35.76 | 2.418924 | 3.938243 | 4.862269 | 6.926777 | 8.701188 | 10.906564 | 12.597516 | 14.519327 |
| 35.86 | 2.429227 | 3.953290 | 4.863503 | 6.927439 | 8.722244 | 10.875249 | 12.543422 | 14.479812 |
| 35.96 | 2.425733 | 3.959958 | 4.903717 | 6.920317 | 8.741376 | 10.889220 | 12.599997 | 14.518500 |
| 36.06 | 2.448440 | 3.976398 | 4.903280 | 6.953626 | 8.730848 | 10.917586 | 12.583933 | 14.519786 |
| 36.16 | 2.440528 | 3.958159 | 4.903493 | 6.991166 | 8.699566 | 10.998872 | 12.698212 | 14.636516 |
| 36.26 | 2.447720 | 3.996122 | 4.909755 | 6.963173 | 8.748761 | 10.977703 | 12.681330 | 14.581702 |
| 36.36 | 2.445041 | 3.999562 | 4.892163 | 6.989644 | 8.745212 | 10.961573 | 12.689481 | 14.594931 |
| 36.46 | 2.453146 | 4.001913 | 4.924709 | 7.008601 | 8.812965 | 10.994854 | 12.657692 | 14.645528 |
| 36.56 | 2.450483 | 4.014954 | 4.940604 | 6.979216 | 8.793562 | 11.056780 | 12.749785 | 14.687738 |
| 36.66 | 2.470371 | 3.999049 | 4.945624 | 7.000725 | 8.812659 | 11.022400 | 12.713633 | 14.748648 |
| 36.76 | 2.474175 | 4.002265 | 4.944787 | 7.044753 | 8.789381 | 11.024484 | 12.765429 | 14.683095 |
| 36.86 | 2.461955 | 4.013659 | 4.962148 | 7.013233 | 8.820806 | 11.097469 | 12.736038 | 14.747126 |
| 36.96 | 2.467646 | 4.024969 | 4.965174 | 7.032968 | 8.856343 | 11.123344 | 12.858028 | 14.821418 |
| 37.06 | 2.483954 | 4.026998 | 4.989344 | 7.042831 | 8.838292 | 11.064100 | 12.780128 | 14.848712 |
| 37.16 | 2.492151 | 4.037009 | 4.993960 | 7.087783 | 8.859281 | 11.142837 | 12.813168 | 14.827502 |
| 37.26 | 2.492845 | 4.031926 | 5.004643 | 7.084441 | 8.904199 | 11.126052 | 12.848649 | 14.854672 |
| 37.36 | 2.480832 | 4.038867 | 4.973540 | 7.066615 | 8.898175 | 11.154786 | 12.930664 | 14.846844 |
| 37.46 | 2.486238 | 4.065199 | 4.994797 | 7.089927 | 8.944009 | 11.146080 | 12.931322 | 14.922663 |
| 37.56 | 2.487927 | 4.068725 | 4.984030 | 7.121442 | 8.940757 | 11.180381 | 12.986526 | 14.939109 |
| 37.66 | 2.501313 | 4.072119 | 5.028553 | 7.104989 | 8.905875 | 11.214687 | 12.977012 | 14.901054 |
| 37.76 | 2.505344 | 4.073302 | 5.019190 | 7.110264 | 8.973357 | 11.183258 | 12.952221 | 14.903924 |
| 37.86 | 2.516889 | 4.094271 | 5.037315 | 7.125444 | 8.989402 | 11.199876 | 13.003245 | 14.965489 |
| 37.96 | 2.512195 | 4.076944 | 5.057063 | 7.153702 | 8.987981 | 11.255682 | 12.992189 | 15.021846 |
| 38.06 | 2.520044 | 4.078313 | 5.063687 | 7.165170 | 8.967712 | 11.267579 | 13.078201 | 15.079201 |
| 38.16 | 2.520279 | 4.090896 | 5.053923 | 7.205516 | 9.000162 | 11.294346 | 13.069354 | 15.070043 |
| 38.26 | 2.519427 | 4.091715 | 5.063700 | 7.168506 | 8.997964 | 11.298132 | 13.095915 | 15.135396 |
| 38.36 | 2.531998 | 4.128669 | 5.082013 | 7.234172 | 9.036498 | 11.292340 | 13.141787 | 15.132604 |
| 38.46 | 2.531593 | 4.133630 | 5.092594 | 7.233262 | 9.030180 | 11.326801 | 13.165066 | 15.140117 |
| 38.56 | 2.529508 | 4.109463 | 5.079879 | 7.209951 | 9.025273 | 11.319441 | 13.177652 | 15.102514 |
| 38.66 | 2.531898 | 4.112434 | 5.101972 | 7.231554 | 9.056989 | 11.339486 | 13.142384 | 15.197229 |
| 38.76 | 2.539593 | 4.128805 | 5.075387 | 7.246253 | 9.064143 | 11.422161 | 13.121189 | 15.215557 |
| 38.86 | 2.547790 | 4.148341 | 5.098649 | 7.242310 | 9.132622 | 11.397632 | 13.231101 | 15.258977 |
| 38.96 | 2.558446 | 4.161352 | 5.130844 | 7.297104 | 9.076309 | 11.402043 | 13.191191 | 15.276579 |
| 39.06 | 2.554514 | 4.153136 | 5.119241 | 7.268691 | 9.091297 | 11.417464 | 13.181595 | 15.267864 |
| 39.16 | 2.564148 | 4.154184 | 5.110721 | 7.269015 | 9.124412 | 11.475726 | 13.193403 | 15.331232 |
| 39.26 | 2.557826 | 4.162985 | 5.127872 | 7.313894 | 9.158051 | 11.435987 | 13.208828 | 15.318330 |
| 39.36 | 2.556202 | 4.171356 | 5.146637 | 7.309786 | 9.169436 | 11.501144 | 13.271365 | 15.309363 |
| 39.46 | 2.567697 | 4.189239 | 5.146411 | 7.341809 | 9.156479 | 11.489556 | 13.252732 | 15.285591 |
| 39.56 | 2.567492 | 4.187290 | 5.168655 | 7.352532 | 9.235377 | 11.570034 | 13.373889 | 15.325298 |
| 39.66 | 2.579533 | 4.182773 | 5.177790 | 7.343806 | 9.243285 | 11.554942 | 13.373157 | 15.361760 |
| 39.76 | 2.574786 | 4.203795 | 5.171331 | 7.377510 | 9.231953 | 11.611345 | 13.383099 | 15.371179 |
| 39.86 | 2.576677 | 4.210212 | 5.188023 | 7.358399 | 9.198481 | 11.566754 | 13.369404 | 15.417584 |
| 39.96 | 2.585153 | 4.206799 | 5.165934 | 7.353281 | 9.238110 | 11.583918 | 13.418447 | 15.484936 |
| 40.06 | 2.593781 | 4.225895 | 5.179211 | 7.357843 | 9.293794 | 11.616276 | 13.367265 | 15.468051 |
| 40.16 | 2.599679 | 4.221702 | 5.180484 | 7.421805 | 9.288886 | 11.673393 | 13.390046 | 15.554774 |
| 40.26 | 2.598311 | 4.212216 | 5.195751 | 7.384152 | 9.264790 | 11.600264 | 13.438614 | 15.512684 |
| 40.36 | 2.593358 | 4.237368 | 5.226425 | 7.396565 | 9.284333 | 11.656834 | 13.428391 | 15.504999 |
| 40.46 | 2.611164 | 4.238151 | 5.240467 | 7.412123 | 9.317428 | 11.649303 | 13.509597 | 15.543461 |
| 40.56 | 2.596460 | 4.253970 | 5.224394 | 7.411166 | 9.357019 | 11.671107 | 13.562490 | 15.574162 |
| 40.66 | 2.606726 | 4.238098 | 5.239666 | 7.456541 | 9.312760 | 11.705616 | 13.529629 | 15.563239 |
| 40.76 | 2.617994 | 4.251246 | 5.265531 | 7.441935 | 9.367804 | 11.705818 | 13.589406 | 15.649923 |
| 40.86 | 2.625166 | 4.257635 | 5.270397 | 7.454020 | 9.365506 | 11.764757 | 13.551390 | 15.628517 |
| 40.96 | 2.612691 | 4.252110 | 5.265634 | 7.467247 | 9.340533 | 11.779143 | 13.578198 | 15.724595 |
| 41.06 | 2.622529 | 4.274059 | 5.247690 | 7.454701 | 9.424522 | 11.782349 | 13.574151 | 15.712351 |
| 41.16 | 2.638882 | 4.289851 | 5.282876 | 7.464566 | 9.399442 | 11.769184 | 13.676063 | 15.767238 |
| 41.26 | 2.634980 | 4.279799 | 5.281514 | 7.517891 | 9.414767 | 11.781324 | 13.609192 | 15.739143 |
| 41.36 | 2.636095 | 4.284364 | 5.301575 | 7.537118 | 9.464612 | 11.792308 | 13.704325 | 15.780713 |
| 41.46 | 2.636009 | 4.281083 | 5.292423 | 7.512460 | 9.441737 | 11.784768 | 13.616892 | 15.777063 |
| 41.56 | 2.653710 | 4.313715 | 5.292190 | 7.540805 | 9.426668 | 11.889285 | 13.681021 | 15.839746 |
| 41.66 | 2.652599 | 4.304451 | 5.296234 | 7.546158 | 9.428324 | 11.897433 | 13.726171 | 15.833486 |
| 41.76 | 2.645894 | 4.301868 | 5.329490 | 7.546898 | 9.442854 | 11.929993 | 13.785629 | 15.887206 |
| 41.86 | 2.650740 | 4.302109 | 5.297422 | 7.564829 | 9.514133 | 11.913743 | 13.700374 | 15.897379 |
| 41.96 | 2.656876 | 4.333019 | 5.325137 | 7.599327 | 9.483253 | 11.919329 | 13.768579 | 15.922018 |
| 42.06 | 2.661952 | 4.348240 | 5.341558 | 7.580434 | 9.541877 | 11.895698 | 13.744537 | 15.884693 |
| 42.16 | 2.657423 | 4.325280 | 5.328679 | 7.628960 | 9.490812 | 11.961586 | 13.833800 | 15.891019 |
| 42.26 | 2.679517 | 4.335614 | 5.368307 | 7.624392 | 9.573686 | 11.940883 | 13.785837 | 15.962541 |
| 42.36 | 2.676170 | 4.336543 | 5.373151 | 7.623141 | 9.564356 | 11.995401 | 13.800919 | 15.892985 |
| 42.46 | 2.684285 | 4.350361 | 5.360531 | 7.655442 | 9.574670 | 12.024199 | 13.820675 | 15.964433 |
| 42.56 | 2.679416 | 4.351194 | 5.351982 | 7.644997 | 9.592004 | 11.957648 | 13.917186 | 15.956326 |
| 42.66 | 2.685664 | 4.358194 | 5.399366 | 7.660375 | 9.548559 | 11.983559 | 13.906402 | 16.018717 |
| 42.76 | 2.692903 | 4.355558 | 5.392613 | 7.650426 | 9.600553 | 12.053959 | 13.899249 | 16.057335 |
| 42.86 | 2.695307 | 4.385670 | 5.370134 | 7.674234 | 9.605143 | 12.096561 | 13.868202 | 16.060776 |
| 42.96 | 2.680299 | 4.381146 | 5.382973 | 7.707233 | 9.609392 | 12.018901 | 13.941079 | 16.147638 |
| 43.06 | 2.699319 | 4.369292 | 5.427075 | 7.698233 | 9.662330 | 12.086358 | 14.001029 | 16.064529 |
| 43.16 | 2.692898 | 4.386995 | 5.433037 | 7.681914 | 9.624250 | 12.127520 | 14.005577 | 16.166986 |
| 43.26 | 2.699923 | 4.406288 | 5.409366 | 7.732330 | 9.672204 | 12.093463 | 13.978679 | 16.067319 |
| 43.36 | 2.707993 | 4.403727 | 5.444959 | 7.697198 | 9.687642 | 12.146358 | 14.008385 | 16.124906 |
| 43.46 | 2.719255 | 4.427157 | 5.442509 | 7.720272 | 9.690973 | 12.196258 | 14.047663 | 16.216244 |
| 43.56 | 2.700984 | 4.400175 | 5.422172 | 7.748403 | 9.675123 | 12.135523 | 14.088495 | 16.140164 |
| 43.66 | 2.726457 | 4.411074 | 5.463705 | 7.742887 | 9.740987 | 12.149525 | 14.063063 | 16.249531 |
| 43.76 | 2.708572 | 4.408711 | 5.433719 | 7.727001 | 9.716525 | 12.154103 | 14.081809 | 16.267129 |
| 43.86 | 2.730240 | 4.421091 | 5.462148 | 7.761436 | 9.694494 | 12.173129 | 14.095298 | 16.186968 |
| 43.96 | 2.737776 | 4.428086 | 5.471008 | 7.798527 | 9.739013 | 12.183639 | 14.119710 | 16.210550 |
| 44.06 | 2.717255 | 4.456634 | 5.457664 | 7.773449 | 9.731449 | 12.207443 | 14.103085 | 16.260734 |
| 44.16 | 2.732691 | 4.453846 | 5.498286 | 7.792495 | 9.813342 | 12.220819 | 14.204214 | 16.290203 |
| 44.26 | 2.735691 | 4.456876 | 5.463785 | 7.789947 | 9.761333 | 12.245954 | 14.200259 | 16.282367 |
| 44.36 | 2.737462 | 4.473819 | 5.512806 | 7.816633 | 9.803727 | 12.259815 | 14.164721 | 16.395866 |
| 44.46 | 2.744886 | 4.482369 | 5.479031 | 7.847619 | 9.849047 | 12.328533 | 14.182886 | 16.396818 |
| 44.56 | 2.746087 | 4.476354 | 5.515324 | 7.855622 | 9.825472 | 12.363630 | 14.256966 | 16.449369 |
| 44.66 | 2.760734 | 4.482367 | 5.507099 | 7.829843 | 9.861942 | 12.354308 | 14.206441 | 16.383020 |
| 44.76 | 2.757798 | 4.491101 | 5.520147 | 7.812373 | 9.826740 | 12.336341 | 14.307882 | 16.447999 |
| 44.86 | 2.752535 | 4.475763 | 5.519360 | 7.820869 | 9.879788 | 12.305973 | 14.246218 | 16.408576 |
| 44.96 | 2.761764 | 4.471941 | 5.540562 | 7.846812 | 9.851080 | 12.376424 | 14.316702 | 16.454364 |
| 45.06 | 2.751257 | 4.513135 | 5.545123 | 7.897618 | 9.893327 | 12.337075 | 14.287804 | 16.491818 |
| 45.16 | 2.766067 | 4.491994 | 5.545767 | 7.869878 | 9.860667 | 12.371536 | 14.309994 | 16.462397 |
| 45.26 | 2.781289 | 4.501627 | 5.538453 | 7.859932 | 9.886427 | 12.436187 | 14.333018 | 16.512850 |
| 45.36 | 2.766807 | 4.522284 | 5.555488 | 7.878470 | 9.913967 | 12.409386 | 14.408842 | 16.622552 |
| 45.46 | 2.781260 | 4.502818 | 5.541246 | 7.913316 | 9.926034 | 12.444926 | 14.431808 | 16.643649 |
| 45.56 | 2.774774 | 4.519852 | 5.547841 | 7.955703 | 9.960584 | 12.491497 | 14.363845 | 16.658309 |
| 45.66 | 2.775146 | 4.528613 | 5.584847 | 7.939593 | 9.915306 | 12.496097 | 14.381923 | 16.643849 |
| 45.76 | 2.792496 | 4.550393 | 5.576236 | 7.942388 | 9.964608 | 12.504828 | 14.389407 | 16.698714 |
| 45.86 | 2.784759 | 4.549474 | 5.606027 | 7.953382 | 10.002934 | 12.532736 | 14.428556 | 16.702740 |
| 45.96 | 2.800271 | 4.526674 | 5.579312 | 7.967236 | 9.989173 | 12.510557 | 14.435891 | 16.633084 |
| 46.06 | 2.807022 | 4.528154 | 5.613210 | 7.940736 | 9.988250 | 12.548166 | 14.498128 | 16.685980 |
| 46.16 | 2.795589 | 4.535684 | 5.625955 | 7.944114 | 10.029612 | 12.535960 | 14.479543 | 16.651170 |
| 46.26 | 2.797831 | 4.571226 | 5.619218 | 7.979355 | 10.059230 | 12.517663 | 14.539970 | 16.669036 |
| 46.36 | 2.809201 | 4.551275 | 5.601507 | 8.009550 | 10.052840 | 12.628670 | 14.538656 | 16.753538 |
| 46.46 | 2.802863 | 4.573366 | 5.644171 | 7.981996 | 10.082175 | 12.615988 | 14.510598 | 16.751307 |
| 46.56 | 2.804915 | 4.565447 | 5.627887 | 8.046522 | 10.041616 | 12.575946 | 14.525505 | 16.798012 |
| 46.66 | 2.815233 | 4.580736 | 5.658074 | 8.043217 | 10.048027 | 12.599618 | 14.512962 | 16.858771 |
| 46.76 | 2.813216 | 4.568194 | 5.631678 | 8.021670 | 10.082327 | 12.686602 | 14.566470 | 16.866433 |
| 46.86 | 2.830663 | 4.570105 | 5.632681 | 8.042187 | 10.098058 | 12.619220 | 14.575293 | 16.908293 |
| 46.96 | 2.823278 | 4.595017 | 5.677699 | 8.023018 | 10.056138 | 12.654612 | 14.636684 | 16.855610 |
| 47.06 | 2.815814 | 4.609438 | 5.688173 | 8.062505 | 10.128984 | 12.706171 | 14.643070 | 16.836739 |
| 47.16 | 2.832686 | 4.617276 | 5.653355 | 8.097279 | 10.074844 | 12.681887 | 14.619163 | 16.924395 |
| 47.26 | 2.844540 | 4.598208 | 5.657542 | 8.039876 | 10.109910 | 12.738409 | 14.668637 | 16.983999 |
| 47.36 | 2.838540 | 4.630775 | 5.661286 | 8.058019 | 10.147272 | 12.771992 | 14.747133 | 16.892102 |
| 47.46 | 2.828986 | 4.625122 | 5.684885 | 8.123011 | 10.107738 | 12.750280 | 14.721470 | 16.954469 |
| 47.56 | 2.852379 | 4.639175 | 5.719652 | 8.115626 | 10.177639 | 12.790775 | 14.763619 | 16.957695 |
| 47.66 | 2.847879 | 4.624923 | 5.698540 | 8.141671 | 10.214974 | 12.731630 | 14.732710 | 17.019207 |
| 47.76 | 2.837445 | 4.620690 | 5.729084 | 8.085892 | 10.220604 | 12.730856 | 14.696018 | 16.950093 |
| 47.86 | 2.850719 | 4.619486 | 5.701211 | 8.131932 | 10.233757 | 12.767401 | 14.779896 | 17.044783 |
| 47.96 | 2.844010 | 4.640219 | 5.724897 | 8.170620 | 10.230355 | 12.828833 | 14.836080 | 17.072716 |
| 48.06 | 2.855904 | 4.667721 | 5.746401 | 8.176859 | 10.252024 | 12.829997 | 14.859518 | 17.014355 |
| 48.16 | 2.861525 | 4.671291 | 5.717138 | 8.154812 | 10.268283 | 12.842918 | 14.801227 | 17.010549 |
| 48.26 | 2.869133 | 4.674919 | 5.753194 | 8.154601 | 10.270752 | 12.898917 | 14.766795 | 17.064005 |
| 48.36 | 2.859026 | 4.684307 | 5.761097 | 8.138748 | 10.213598 | 12.894853 | 14.888002 | 17.097538 |
| 48.46 | 2.867600 | 4.668033 | 5.735704 | 8.156302 | 10.239621 | 12.857698 | 14.869177 | 17.111985 |
| 48.56 | 2.880900 | 4.685901 | 5.746712 | 8.201954 | 10.262627 | 12.863311 | 14.836579 | 17.196666 |
| 48.66 | 2.870534 | 4.685424 | 5.746237 | 8.221427 | 10.325415 | 12.943850 | 14.847125 | 17.210694 |
| 48.76 | 2.887113 | 4.675123 | 5.777797 | 8.243041 | 10.337015 | 12.930331 | 14.947868 | 17.261806 |
| 48.86 | 2.881487 | 4.695066 | 5.759665 | 8.249411 | 10.270415 | 12.938530 | 14.911930 | 17.190322 |
| 48.96 | 2.873276 | 4.690986 | 5.780214 | 8.203855 | 10.361937 | 12.922238 | 14.977411 | 17.188978 |
| 49.06 | 2.889586 | 4.695975 | 5.791057 | 8.259131 | 10.340062 | 12.919890 | 14.963463 | 17.283737 |
| 49.16 | 2.892006 | 4.684532 | 5.809966 | 8.273423 | 10.302817 | 12.991098 | 14.913565 | 17.324282 |
| 49.26 | 2.898385 | 4.727499 | 5.785962 | 8.218866 | 10.334824 | 13.033063 | 14.965761 | 17.299970 |
| 49.36 | 2.906786 | 4.729658 | 5.783506 | 8.264914 | 10.404223 | 12.991871 | 15.042554 | 17.346838 |
| 49.46 | 2.910791 | 4.713533 | 5.830999 | 8.265399 | 10.410050 | 13.009068 | 15.077117 | 17.280536 |
| 49.56 | 2.905145 | 4.726406 | 5.834280 | 8.281031 | 10.359383 | 12.972177 | 15.082544 | 17.314860 |
| 49.66 | 2.914781 | 4.711349 | 5.824824 | 8.276839 | 10.367781 | 12.993936 | 15.067806 | 17.413918 |
| 49.76 | 2.922423 | 4.750867 | 5.826062 | 8.314839 | 10.443662 | 13.015576 | 15.069014 | 17.355004 |
| 49.86 | 2.915271 | 4.745165 | 5.854868 | 8.271169 | 10.400035 | 13.065248 | 15.131535 | 17.430489 |
| 49.96 | 2.904900 | 4.748016 | 5.832652 | 8.326668 | 10.449341 | 13.080215 | 15.145935 | 17.367337 |
| 50.06 | 2.911501 | 4.756966 | 5.835975 | 8.350933 | 10.433210 | 13.055084 | 15.092938 | 17.448532 |
| 50.16 | 2.916343 | 4.773039 | 5.838157 | 8.332627 | 10.433477 | 13.123031 | 15.096488 | 17.420359 |
| 50.26 | 2.912497 | 4.766321 | 5.854016 | 8.371949 | 10.434739 | 13.056865 | 15.151106 | 17.492612 |
| 50.36 | 2.929392 | 4.754414 | 5.870265 | 8.309944 | 10.456062 | 13.150751 | 15.214084 | 17.420095 |
| 50.46 | 2.936011 | 4.779878 | 5.874563 | 8.365123 | 10.473052 | 13.081627 | 15.220054 | 17.515803 |
| 50.56 | 2.943825 | 4.773593 | 5.895251 | 8.386972 | 10.444291 | 13.146453 | 15.240998 | 17.473532 |
| 50.66 | 2.935932 | 4.771228 | 5.900963 | 8.405372 | 10.471384 | 13.221063 | 15.225196 | 17.579123 |
| 50.76 | 2.941796 | 4.764891 | 5.872458 | 8.386854 | 10.490049 | 13.163573 | 15.187215 | 17.593642 |
| 50.86 | 2.947082 | 4.772447 | 5.899816 | 8.373353 | 10.497817 | 13.237580 | 15.231217 | 17.583628 |
| 50.96 | 2.949490 | 4.802731 | 5.882795 | 8.396180 | 10.532062 | 13.248488 | 15.305195 | 17.574122 |
| 51.06 | 2.940256 | 4.812795 | 5.889913 | 8.380712 | 10.577169 | 13.264790 | 15.201914 | 17.579885 |
| 51.16 | 2.941595 | 4.809846 | 5.922822 | 8.396005 | 10.559507 | 13.285082 | 15.214544 | 17.673486 |
| 51.26 | 2.956692 | 4.803687 | 5.908058 | 8.431625 | 10.566729 | 13.294628 | 15.272185 | 17.645402 |
| 51.36 | 2.961803 | 4.798312 | 5.947371 | 8.411670 | 10.539248 | 13.262742 | 15.364646 | 17.661798 |
| 51.46 | 2.972520 | 4.797042 | 5.935513 | 8.459802 | 10.619803 | 13.330413 | 15.314589 | 17.705569 |
| 51.56 | 2.972630 | 4.839202 | 5.941978 | 8.460835 | 10.639082 | 13.314351 | 15.331389 | 17.665151 |
| 51.66 | 2.973201 | 4.817041 | 5.926482 | 8.459124 | 10.591622 | 13.320958 | 15.376315 | 17.656159 |
| 51.76 | 2.972193 | 4.831562 | 5.931261 | 8.459288 | 10.585877 | 13.265173 | 15.318355 | 17.675306 |
| 51.86 | 2.982638 | 4.837545 | 5.942254 | 8.473269 | 10.652049 | 13.353652 | 15.402868 | 17.737592 |
| 51.96 | 2.980762 | 4.839224 | 5.968040 | 8.503496 | 10.675455 | 13.381053 | 15.420475 | 17.768032 |
| 52.06 | 2.983403 | 4.826448 | 5.993965 | 8.455107 | 10.630386 | 13.338097 | 15.379989 | 17.701117 |
| 52.16 | 2.989312 | 4.853281 | 5.996004 | 8.477175 | 10.611515 | 13.404915 | 15.453593 | 17.854765 |
| 52.26 | 2.989770 | 4.843959 | 6.003829 | 8.464772 | 10.618801 | 13.383493 | 15.458572 | 17.739303 |
| 52.36 | 2.998402 | 4.877302 | 5.978914 | 8.511581 | 10.706500 | 13.340378 | 15.472232 | 17.846833 |
| 52.46 | 2.984074 | 4.877090 | 5.978572 | 8.490872 | 10.657065 | 13.417409 | 15.491395 | 17.825717 |
| 52.56 | 2.983343 | 4.862673 | 5.991978 | 8.543981 | 10.708122 | 13.445253 | 15.511202 | 17.828606 |
| 52.66 | 2.984670 | 4.859840 | 6.015425 | 8.563745 | 10.734143 | 13.484411 | 15.561848 | 17.825628 |
| 52.76 | 2.993689 | 4.877174 | 5.984024 | 8.510961 | 10.730517 | 13.404294 | 15.532439 | 17.823123 |
| 52.86 | 3.007736 | 4.869616 | 6.027395 | 8.584449 | 10.709754 | 13.428955 | 15.518459 | 17.838242 |
| 52.96 | 3.009613 | 4.893790 | 6.019233 | 8.568661 | 10.750612 | 13.513279 | 15.566999 | 17.926872 |
| 53.06 | 2.999829 | 4.910147 | 6.036631 | 8.596794 | 10.789734 | 13.471070 | 15.598954 | 17.869646 |
| 53.16 | 3.000283 | 4.903823 | 6.048679 | 8.546530 | 10.719413 | 13.456158 | 15.542385 | 17.918592 |
| 53.26 | 3.008641 | 4.909037 | 6.037683 | 8.576944 | 10.743254 | 13.527296 | 15.612315 | 17.931652 |
| 53.36 | 3.020082 | 4.906320 | 6.044384 | 8.602292 | 10.782155 | 13.495849 | 15.575279 | 18.008491 |
| 53.46 | 3.009509 | 4.925801 | 6.063860 | 8.578789 | 10.773562 | 13.469778 | 15.647969 | 18.015878 |
| 53.56 | 3.017002 | 4.928019 | 6.047585 | 8.583817 | 10.774155 | 13.551209 | 15.681290 | 18.039485 |
| 53.66 | 3.014375 | 4.923382 | 6.084432 | 8.651767 | 10.786153 | 13.542502 | 15.701433 | 18.078998 |
| 53.76 | 3.028281 | 4.944189 | 6.080793 | 8.657194 | 10.811812 | 13.568787 | 15.630816 | 18.007711 |
| 53.86 | 3.040816 | 4.906796 | 6.087603 | 8.603305 | 10.849070 | 13.551138 | 15.702512 | 18.067581 |
| 53.96 | 3.035322 | 4.913878 | 6.102916 | 8.646012 | 10.855344 | 13.537843 | 15.657793 | 18.160121 |
| 54.06 | 3.035533 | 4.942462 | 6.090114 | 8.636135 | 10.878265 | 13.655921 | 15.746726 | 18.109738 |
| 54.16 | 3.038933 | 4.930910 | 6.074964 | 8.621642 | 10.819022 | 13.645933 | 15.748200 | 18.116242 |
| 54.26 | 3.028768 | 4.928690 | 6.107133 | 8.680731 | 10.841964 | 13.611381 | 15.806557 | 18.193330 |
| 54.36 | 3.032694 | 4.938775 | 6.072739 | 8.689114 | 10.916898 | 13.625875 | 15.805497 | 18.222579 |
| 54.46 | 3.053658 | 4.946963 | 6.095906 | 8.706093 | 10.922017 | 13.663634 | 15.809382 | 18.148899 |
| 54.56 | 3.052373 | 4.975435 | 6.106455 | 8.680937 | 10.941658 | 13.626360 | 15.835450 | 18.272495 |
| 54.66 | 3.044883 | 4.976842 | 6.092292 | 8.699057 | 10.910225 | 13.710193 | 15.783711 | 18.254503 |
| 54.76 | 3.056795 | 4.968158 | 6.118837 | 8.694387 | 10.893387 | 13.686633 | 15.839174 | 18.157659 |
| 54.86 | 3.048205 | 4.989999 | 6.113674 | 8.685440 | 10.922607 | 13.703075 | 15.851532 | 18.315991 |
| 54.96 | 3.047357 | 4.968014 | 6.126758 | 8.743551 | 10.910016 | 13.700035 | 15.880664 | 18.334594 |
| 55.06 | 3.052538 | 4.959858 | 6.152503 | 8.691492 | 10.942173 | 13.777461 | 15.918717 | 18.267840 |
| 55.16 | 3.066196 | 4.974995 | 6.162363 | 8.739169 | 10.986767 | 13.735198 | 15.912240 | 18.281968 |
| 55.26 | 3.063831 | 4.998085 | 6.135635 | 8.743679 | 10.926731 | 13.797081 | 15.899684 | 18.233113 |
| 55.36 | 3.063977 | 5.010967 | 6.146167 | 8.727756 | 11.004025 | 13.725873 | 15.863674 | 18.400510 |
| 55.46 | 3.083244 | 4.978510 | 6.134917 | 8.737801 | 10.977577 | 13.779391 | 15.968097 | 18.338604 |
| 55.56 | 3.061735 | 5.024385 | 6.180671 | 8.787896 | 10.956144 | 13.744616 | 15.960217 | 18.336654 |
| 55.66 | 3.083549 | 4.996268 | 6.192056 | 8.732564 | 11.027371 | 13.838735 | 15.882590 | 18.454271 |
| 55.76 | 3.091261 | 5.026553 | 6.176456 | 8.774186 | 10.992706 | 13.841870 | 15.944664 | 18.411465 |
| 55.86 | 3.086713 | 5.025189 | 6.184832 | 8.807363 | 11.025077 | 13.822527 | 16.007208 | 18.347261 |
| 55.96 | 3.088943 | 5.010849 | 6.196609 | 8.787929 | 11.059934 | 13.838041 | 15.954367 | 18.459616 |
| 56.06 | 3.084904 | 5.032621 | 6.211758 | 8.818080 | 11.055137 | 13.821575 | 16.016910 | 18.477099 |
| 56.16 | 3.082641 | 5.035464 | 6.172334 | 8.826130 | 11.043467 | 13.876635 | 16.075479 | 18.383363 |
| 56.26 | 3.087112 | 5.027179 | 6.175821 | 8.835642 | 11.089901 | 13.865091 | 15.991159 | 18.435011 |
| 56.36 | 3.087862 | 5.017963 | 6.229402 | 8.841791 | 11.051171 | 13.857898 | 16.086488 | 18.505616 |
| 56.46 | 3.096490 | 5.049511 | 6.218445 | 8.798789 | 11.086794 | 13.944444 | 15.973273 | 18.478111 |
| 56.56 | 3.103341 | 5.037808 | 6.222545 | 8.810623 | 11.088819 | 13.957280 | 16.022109 | 18.454176 |
| 56.66 | 3.105237 | 5.052058 | 6.196844 | 8.821813 | 11.110128 | 13.864175 | 16.115083 | 18.469245 |
| 56.76 | 3.108129 | 5.054151 | 6.225710 | 8.846334 | 11.113537 | 13.935649 | 16.046081 | 18.508113 |
| 56.86 | 3.117318 | 5.073085 | 6.230078 | 8.841502 | 11.152275 | 13.926286 | 16.095653 | 18.501080 |
| 56.96 | 3.104636 | 5.082098 | 6.235237 | 8.878422 | 11.144323 | 13.933923 | 16.166116 | 18.592751 |
| 57.06 | 3.127703 | 5.069404 | 6.252929 | 8.871830 | 11.144344 | 13.952636 | 16.141322 | 18.659168 |
| 57.16 | 3.116235 | 5.085062 | 6.273254 | 8.893527 | 11.117858 | 13.964612 | 16.165535 | 18.535579 |
| 57.26 | 3.109245 | 5.068700 | 6.274229 | 8.876441 | 11.187252 | 13.931064 | 16.165743 | 18.645129 |
| 57.36 | 3.125930 | 5.097307 | 6.269235 | 8.932674 | 11.141060 | 13.936871 | 16.181437 | 18.658892 |
| 57.46 | 3.127418 | 5.070858 | 6.280511 | 8.904959 | 11.201723 | 14.015407 | 16.164323 | 18.636150 |
| 57.56 | 3.139765 | 5.087848 | 6.265748 | 8.926181 | 11.188642 | 14.012069 | 16.209026 | 18.688249 |
| 57.66 | 3.131153 | 5.094907 | 6.290505 | 8.913891 | 11.213559 | 14.069283 | 16.206019 | 18.653827 |
| 57.76 | 3.136389 | 5.092780 | 6.282021 | 8.909760 | 11.202167 | 14.003864 | 16.157031 | 18.754202 |
| 57.86 | 3.146809 | 5.084865 | 6.294873 | 8.946563 | 11.169594 | 14.038590 | 16.281593 | 18.752720 |
| 57.96 | 3.125890 | 5.118497 | 6.302873 | 8.962797 | 11.261581 | 14.006205 | 16.175641 | 18.745696 |
| 58.06 | 3.132391 | 5.126807 | 6.279783 | 8.917220 | 11.193098 | 14.048744 | 16.225822 | 18.810524 |
| 58.16 | 3.151755 | 5.133938 | 6.282816 | 8.950268 | 11.190752 | 14.139134 | 16.303978 | 18.745503 |
| 58.26 | 3.147102 | 5.123678 | 6.294175 | 8.931751 | 11.254862 | 14.063964 | 16.236272 | 18.751179 |
| 58.36 | 3.157813 | 5.101236 | 6.335965 | 9.005653 | 11.273535 | 14.090669 | 16.351313 | 18.762014 |
| 58.46 | 3.143056 | 5.125976 | 6.318707 | 8.986479 | 11.288475 | 14.126964 | 16.292396 | 18.750100 |
| 58.56 | 3.161668 | 5.119486 | 6.303991 | 8.984514 | 11.312690 | 14.144652 | 16.353201 | 18.793345 |
| 58.66 | 3.142815 | 5.153892 | 6.316689 | 8.952876 | 11.271819 | 14.120726 | 16.315404 | 18.769531 |
| 58.76 | 3.151831 | 5.136614 | 6.344939 | 9.007612 | 11.309494 | 14.120109 | 16.363527 | 18.801338 |
| 58.86 | 3.166755 | 5.141674 | 6.317721 | 8.971436 | 11.253425 | 14.101296 | 16.373458 | 18.934892 |
| 58.96 | 3.159106 | 5.121857 | 6.311232 | 8.997033 | 11.278539 | 14.181076 | 16.361105 | 18.835755 |
| 59.06 | 3.170606 | 5.133448 | 6.344707 | 8.964581 | 11.302953 | 14.141436 | 16.414540 | 18.811457 |
| 59.16 | 3.169338 | 5.146963 | 6.350657 | 9.037862 | 11.273531 | 14.219110 | 16.382435 | 18.829822 |
| 59.26 | 3.156396 | 5.129509 | 6.308269 | 8.970928 | 11.252370 | 14.128922 | 16.437226 | 18.879900 |
| 59.36 | 3.171819 | 5.134760 | 6.344599 | 8.981997 | 11.295956 | 14.149388 | 16.417801 | 18.920601 |
| 59.46 | 3.156479 | 5.153828 | 6.326490 | 8.994712 | 11.349685 | 14.161206 | 16.309993 | 18.872356 |
| 59.56 | 3.157288 | 5.143497 | 6.334401 | 9.040098 | 11.327337 | 14.188738 | 16.444693 | 18.931549 |
| 59.66 | 3.153698 | 5.162931 | 6.320814 | 9.028214 | 11.288294 | 14.232217 | 16.414115 | 18.816425 |
| 59.76 | 3.174211 | 5.153824 | 6.331383 | 9.054053 | 11.271108 | 14.138332 | 16.397993 | 18.935849 |
| 59.86 | 3.167270 | 5.126546 | 6.341939 | 9.034781 | 11.276815 | 14.172462 | 16.342930 | 18.886209 |
| 59.96 | 3.175151 | 5.158226 | 6.315394 | 9.005014 | 11.343895 | 14.203341 | 16.423212 | 18.823548 |
| 60.06 | 3.168429 | 5.160287 | 6.316012 | 9.027958 | 11.334518 | 14.176942 | 16.443239 | 18.918945 |
| 60.16 | 3.179459 | 5.153917 | 6.340650 | 9.010572 | 11.287396 | 14.163482 | 16.363500 | 18.972481 |
| 60.26 | 2.977411 | 4.829806 | 5.961636 | 8.519043 | 10.622340 | 13.307645 | 15.380085 | 17.759741 |
| 60.36 | 2.983013 | 4.843515 | 5.971151 | 8.506661 | 10.627051 | 13.362120 | 15.494545 | 17.716362 |
| 60.46 | 2.982099 | 4.838457 | 5.968375 | 8.517130 | 10.646594 | 13.422685 | 15.449314 | 17.773720 |
| 60.56 | 2.971104 | 4.854896 | 5.960057 | 8.539431 | 10.635370 | 13.338817 | 15.445603 | 17.891849 |
| 60.66 | 2.976195 | 4.846850 | 5.972514 | 8.546356 | 10.708394 | 13.419902 | 15.518974 | 17.807807 |
| 60.76 | 2.974971 | 4.839054 | 5.962272 | 8.545410 | 10.721700 | 13.376712 | 15.473770 | 17.785013 |
| 60.86 | 2.989204 | 4.850664 | 5.966195 | 8.513071 | 10.684666 | 13.439657 | 15.454001 | 17.760684 |
| 60.96 | 2.979421 | 4.848831 | 6.002682 | 8.489426 | 10.674642 | 13.364076 | 15.481325 | 17.804061 |
| 61.06 | 2.981794 | 4.879642 | 5.982654 | 8.550337 | 10.693392 | 13.433720 | 15.507790 | 17.831859 |
| 61.16 | 2.993151 | 4.843588 | 5.977607 | 8.514059 | 10.706122 | 13.399240 | 15.421077 | 17.882917 |
| 61.26 | 2.985182 | 4.845457 | 5.978130 | 8.497120 | 10.667839 | 13.363528 | 15.547470 | 17.880826 |
| 61.36 | 2.988544 | 4.856785 | 6.000826 | 8.493675 | 10.739911 | 13.434786 | 15.423150 | 17.824015 |
| 61.46 | 2.989420 | 4.868205 | 5.972088 | 8.492291 | 10.716643 | 13.420798 | 15.448653 | 17.929432 |
| 61.56 | 2.985378 | 4.867881 | 5.998258 | 8.521336 | 10.721114 | 13.403396 | 15.556042 | 17.862634 |
| 61.66 | 2.981012 | 4.854498 | 5.984196 | 8.497986 | 10.689577 | 13.407607 | 15.511584 | 17.851588 |
| 61.76 | 2.991764 | 4.889697 | 6.017951 | 8.564061 | 10.679786 | 13.445862 | 15.455575 | 17.811750 |
| 61.86 | 2.998549 | 4.887287 | 6.002000 | 8.552049 | 10.671963 | 13.475284 | 15.442481 | 17.892227 |
| 61.96 | 2.991657 | 4.874688 | 6.023133 | 8.546821 | 10.713707 | 13.431645 | 15.564990 | 17.844227 |
| 62.06 | 2.979680 | 4.850409 | 5.991844 | 8.526466 | 10.708811 | 13.460702 | 15.447413 | 17.845849 |
| 62.16 | 3.000872 | 4.864702 | 5.992601 | 8.546143 | 10.739069 | 13.413403 | 15.556667 | 17.896213 |
| 62.26 | 3.002079 | 4.887430 | 6.001243 | 8.502073 | 10.681128 | 13.465743 | 15.496939 | 17.822361 |
| 62.36 | 2.980424 | 4.878232 | 6.022582 | 8.505027 | 10.740115 | 13.419076 | 15.489991 | 17.925026 |
| 62.46 | 3.001280 | 4.859015 | 5.976780 | 8.524363 | 10.666516 | 13.413526 | 15.551312 | 17.798629 |
| 62.56 | 2.990157 | 4.862734 | 5.997871 | 8.506453 | 10.725367 | 13.372221 | 15.509758 | 17.919190 |
| 62.66 | 2.996920 | 4.873528 | 5.985963 | 8.546425 | 10.699469 | 13.420007 | 15.559716 | 17.821691 |
| 62.76 | 2.983953 | 4.887608 | 5.989046 | 8.568267 | 10.740177 | 13.460714 | 15.444448 | 17.894645 |
| 62.86 | 2.984208 | 4.857973 | 5.998707 | 8.536056 | 10.658156 | 13.475941 | 15.470092 | 17.874100 |
| 62.96 | 2.990343 | 4.880132 | 5.990766 | 8.562272 | 10.701380 | 13.364206 | 15.518062 | 17.836562 |
| 63.06 | 2.986830 | 4.872408 | 6.012874 | 8.526896 | 10.708604 | 13.477135 | 15.440788 | 17.828289 |
| 63.16 | 2.983847 | 4.852937 | 6.012200 | 8.532374 | 10.744754 | 13.374380 | 15.529201 | 17.898291 |
| 63.26 | 2.996574 | 4.890078 | 6.005859 | 8.518516 | 10.662954 | 13.371515 | 15.495082 | 17.893011 |
| 63.36 | 3.000420 | 4.870605 | 5.991201 | 8.571102 | 10.690944 | 13.409433 | 15.473973 | 17.876611 |
| 63.46 | 2.998122 | 4.872074 | 5.989424 | 8.517877 | 10.684388 | 13.388617 | 15.570262 | 17.891512 |
| 63.56 | 3.003864 | 4.891481 | 5.987191 | 8.566235 | 10.692463 | 13.462570 | 15.472912 | 17.804580 |
| 63.66 | 2.992072 | 4.873276 | 5.975536 | 8.500448 | 10.725913 | 13.474994 | 15.506004 | 17.959794 |
| 63.76 | 2.985760 | 4.859121 | 6.020631 | 8.529288 | 10.723014 | 13.394921 | 15.525736 | 17.945729 |
| 63.86 | 2.992840 | 4.853656 | 6.016923 | 8.546310 | 10.740834 | 13.472613 | 15.501560 | 17.867974 |
| 63.96 | 2.991451 | 4.854793 | 6.025518 | 8.572130 | 10.707347 | 13.371998 | 15.573852 | 17.805080 |
| 64.06 | 2.982197 | 4.885100 | 6.009511 | 8.508077 | 10.714506 | 13.441964 | 15.537421 | 17.817117 |
| 64.16 | 3.006347 | 4.862973 | 6.004587 | 8.539422 | 10.738794 | 13.449982 | 15.574670 | 17.820715 |
| 64.26 | 3.002197 | 4.886721 | 5.984947 | 8.513508 | 10.704313 | 13.477989 | 15.512875 | 17.900488 |
| 64.36 | 2.987644 | 4.854287 | 6.010319 | 8.557723 | 10.664284 | 13.402091 | 15.547914 | 17.869862 |
| 64.46 | 2.999366 | 4.890376 | 5.992199 | 8.517084 | 10.743961 | 13.420993 | 15.470350 | 17.858818 |
| 64.56 | 3.006536 | 4.879346 | 6.011840 | 8.515470 | 10.665514 | 13.433874 | 15.471551 | 17.828334 |
| 64.66 | 3.003898 | 4.878375 | 6.018583 | 8.516779 | 10.716282 | 13.440263 | 15.531298 | 17.831727 |
| 64.76 | 3.000859 | 4.880989 | 5.977657 | 8.565342 | 10.715237 | 13.469685 | 15.512654 | 17.889367 |
| 64.86 | 3.003677 | 4.852698 | 5.982986 | 8.547812 | 10.739208 | 13.388723 | 15.528217 | 17.959129 |
| 64.96 | 3.005005 | 4.872966 | 6.010540 | 8.532635 | 10.677460 | 13.482876 | 15.497177 | 17.909370 |
| 65.06 | 2.985248 | 4.869132 | 6.024158 | 8.502813 | 10.696627 | 13.383496 | 15.475347 | 17.916467 |
| 65.16 | 2.988007 | 4.865159 | 5.977954 | 8.536744 | 10.660688 | 13.372520 | 15.462855 | 17.920739 |
| 65.26 | 2.984399 | 4.885792 | 6.003925 | 8.562641 | 10.704148 | 13.470475 | 15.487602 | 17.868455 |
| 65.36 | 3.002234 | 4.860399 | 6.016775 | 8.554620 | 10.690994 | 13.485550 | 15.487189 | 17.894988 |
| 65.46 | 2.997520 | 4.878528 | 5.992398 | 8.527547 | 10.706712 | 13.448485 | 15.457512 | 17.887884 |
| 65.56 | 2.997748 | 4.880306 | 6.011209 | 8.535162 | 10.717109 | 13.449416 | 15.467320 | 17.960738 |
| 65.66 | 2.986312 | 4.875894 | 6.028374 | 8.548417 | 10.713111 | 13.450562 | 15.524297 | 17.952346 |
| 65.76 | 3.007187 | 4.861910 | 5.990950 | 8.562682 | 10.676519 | 13.488851 | 15.520022 | 17.912961 |
| 65.86 | 3.002177 | 4.888960 | 5.990451 | 8.536665 | 10.677961 | 13.450362 | 15.447753 | 17.821820 |
| 65.96 | 3.003499 | 4.870711 | 5.985370 | 8.537575 | 10.729412 | 13.413236 | 15.531536 | 17.841474 |
| 66.06 | 2.991588 | 4.853766 | 5.987461 | 8.535378 | 10.687298 | 13.423393 | 15.512483 | 17.820756 |
| 66.16 | 2.982015 | 4.870140 | 5.985359 | 8.539786 | 10.705645 | 13.440860 | 15.540844 | 17.860139 |
| 66.26 | 3.007895 | 4.860430 | 5.989748 | 8.519340 | 10.746151 | 13.374286 | 15.451191 | 17.954868 |
| 66.36 | 2.997377 | 4.895358 | 5.989004 | 8.569973 | 10.707607 | 13.387334 | 15.447267 | 17.822605 |
| 66.46 | 3.000768 | 4.863541 | 5.994085 | 8.557256 | 10.716960 | 13.438435 | 15.478894 | 17.960893 |
| 66.56 | 2.993175 | 4.878824 | 5.993694 | 8.525635 | 10.683359 | 13.467179 | 15.471797 | 17.850201 |
| 66.66 | 2.989945 | 4.895514 | 6.020080 | 8.526356 | 10.754111 | 13.460375 | 15.570336 | 17.885048 |
| 66.76 | 2.999504 | 4.877949 | 6.029988 | 8.560628 | 10.738865 | 13.417439 | 15.529572 | 17.849266 |
| 66.86 | 2.992964 | 4.890201 | 6.018240 | 8.520094 | 10.728206 | 13.462325 | 15.578228 | 17.871094 |
| 66.96 | 2.990999 | 4.866936 | 6.002322 | 8.570699 | 10.718192 | 13.376396 | 15.517550 | 17.966741 |
| 67.06 | 2.995815 | 4.887386 | 5.980420 | 8.523606 | 10.674816 | 13.464989 | 15.542996 | 17.843506 |
| 67.16 | 2.990790 | 4.867391 | 6.007507 | 8.555593 | 10.689474 | 13.428362 | 15.516244 | 17.829174 |
| 67.26 | 2.982379 | 4.882453 | 5.981287 | 8.528172 | 10.695906 | 13.393115 | 15.482290 | 17.921779 |
| 67.36 | 2.985871 | 4.860574 | 5.990893 | 8.531304 | 10.728744 | 13.430932 | 15.581079 | 17.914410 |
| 67.46 | 3.004629 | 4.867510 | 6.015080 | 8.534927 | 10.703696 | 13.377853 | 15.470201 | 17.862853 |
| 67.56 | 2.997073 | 4.875319 | 5.995047 | 8.569972 | 10.671254 | 13.423459 | 15.560003 | 17.925851 |
| 67.66 | 2.987008 | 4.875562 | 6.005206 | 8.573623 | 10.694861 | 13.405604 | 15.445477 | 17.880046 |
| 67.76 | 2.982379 | 4.886927 | 6.020773 | 8.523472 | 10.665898 | 13.406069 | 15.512168 | 17.921499 |
| 67.86 | 3.006866 | 4.859096 | 6.016037 | 8.524346 | 10.717450 | 13.440449 | 15.472294 | 17.822439 |
| 67.96 | 2.990031 | 4.877637 | 6.013311 | 8.518965 | 10.738338 | 13.398157 | 15.475560 | 17.837748 |
| 68.06 | 3.001585 | 4.890737 | 6.019765 | 8.532268 | 10.742331 | 13.469393 | 15.512139 | 17.850655 |
| 68.16 | 3.005311 | 4.878401 | 6.002212 | 8.526804 | 10.696087 | 13.421810 | 15.453115 | 17.941274 |
| 68.26 | 2.992899 | 4.872346 | 6.013339 | 8.553726 | 10.670458 | 13.433680 | 15.510728 | 17.814835 |
| 68.36 | 3.003752 | 4.886908 | 6.000595 | 8.532958 | 10.686224 | 13.411820 | 15.523850 | 17.937954 |
| 68.46 | 3.005818 | 4.895750 | 5.985005 | 8.558799 | 10.741761 | 13.421047 | 15.494313 | 17.897437 |
| 68.56 | 2.991172 | 4.887110 | 6.031254 | 8.548351 | 10.710852 | 13.376396 | 15.529150 | 17.821605 |
| 68.66 | 2.996487 | 4.895840 | 6.018399 | 8.522226 | 10.715418 | 13.401670 | 15.575482 | 17.812307 |
| 68.76 | 3.001914 | 4.870719 | 5.992622 | 8.521488 | 10.697649 | 13.463344 | 15.527427 | 17.952826 |
| 68.86 | 3.001167 | 4.868362 | 5.997167 | 8.504580 | 10.666736 | 13.418461 | 15.445287 | 17.887361 |
| 68.96 | 2.983044 | 4.879507 | 6.031803 | 8.526372 | 10.694942 | 13.382475 | 15.571858 | 17.886221 |
| 69.06 | 2.988747 | 4.881703 | 5.993117 | 8.522079 | 10.723197 | 13.403144 | 15.481039 | 17.850968 |
| 69.16 | 3.004646 | 4.856046 | 6.003258 | 8.548480 | 10.698007 | 13.466238 | 15.479500 | 17.945962 |
| 69.26 | 3.008964 | 4.885783 | 6.021014 | 8.542699 | 10.685972 | 13.491365 | 15.488968 | 17.899330 |
| 69.36 | 3.005139 | 4.854246 | 6.002803 | 8.519238 | 10.663835 | 13.459883 | 15.493313 | 17.946401 |
| 69.46 | 2.991292 | 4.865726 | 6.022853 | 8.538564 | 10.696696 | 13.490838 | 15.557977 | 17.871393 |
| 69.56 | 3.001001 | 4.878334 | 6.032087 | 8.574813 | 10.717901 | 13.428028 | 15.529070 | 17.963945 |
| 69.66 | 2.997684 | 4.854031 | 6.015269 | 8.550559 | 10.755209 | 13.483196 | 15.489011 | 17.872132 |
| 69.76 | 3.008572 | 4.882286 | 6.027813 | 8.565718 | 10.741018 | 13.411442 | 15.576835 | 17.884554 |
| 69.86 | 2.995254 | 4.894844 | 5.993388 | 8.538450 | 10.695972 | 13.442523 | 15.535083 | 17.893708 |
| 69.96 | 3.006555 | 4.892211 | 5.986500 | 8.507914 | 10.677419 | 13.398712 | 15.454271 | 17.951266 |
| 70.06 | 3.006682 | 4.893149 | 5.997118 | 8.547114 | 10.733412 | 13.451478 | 15.557186 | 17.816389 |
| 70.16 | 2.998639 | 4.886222 | 6.019442 | 8.570306 | 10.701831 | 13.434690 | 15.572084 | 17.939919 |
| 70.26 | 3.008195 | 4.891268 | 6.013470 | 8.574550 | 10.758349 | 13.441569 | 15.553104 | 17.884015 |
| 70.36 | 3.006687 | 4.893758 | 6.013054 | 8.531730 | 10.757083 | 13.492910 | 15.478935 | 17.860376 |
| 70.46 | 3.001095 | 4.889699 | 6.032812 | 8.502778 | 10.719289 | 13.457004 | 15.559240 | 17.853542 |
| 70.56 | 3.005408 | 4.857250 | 6.024413 | 8.563333 | 10.684781 | 13.411880 | 15.479020 | 17.835443 |
| 70.66 | 3.003126 | 4.864427 | 6.000642 | 8.543375 | 10.686314 | 13.435574 | 15.451909 | 17.914418 |
| 70.76 | 2.983429 | 4.870148 | 5.996848 | 8.515538 | 10.716039 | 13.379686 | 15.517896 | 17.881428 |
| 70.86 | 2.987411 | 4.894765 | 6.028018 | 8.512585 | 10.705835 | 13.417668 | 15.537913 | 17.887871 |
| 70.96 | 2.992476 | 4.895050 | 6.015315 | 8.561227 | 10.672013 | 13.383753 | 15.556522 | 17.899754 |
| 71.06 | 2.985750 | 4.858383 | 6.012782 | 8.531637 | 10.745070 | 13.389340 | 15.506456 | 17.835774 |
| 71.16 | 2.988092 | 4.896537 | 5.998913 | 8.560115 | 10.697066 | 13.382913 | 15.549833 | 17.905583 |
| 71.26 | 2.986677 | 4.881068 | 5.991522 | 8.543159 | 10.720690 | 13.450324 | 15.537311 | 17.941107 |
| 71.36 | 3.007222 | 4.858415 | 6.018264 | 8.505794 | 10.720716 | 13.423883 | 15.468316 | 17.847822 |
| 71.46 | 3.000818 | 4.868392 | 6.031365 | 8.526602 | 10.688822 | 13.486987 | 15.550122 | 17.834706 |
| 71.56 | 2.994016 | 4.895965 | 6.006024 | 8.561403 | 10.698166 | 13.397137 | 15.578276 | 17.834236 |
| 71.66 | 2.993910 | 4.893615 | 6.007722 | 8.572154 | 10.743914 | 13.464017 | 15.564106 | 17.823777 |
| 71.76 | 2.992345 | 4.864781 | 5.984517 | 8.566409 | 10.719154 | 13.401573 | 15.461467 | 17.890351 |
| 71.86 | 2.987038 | 4.863686 | 5.988350 | 8.549181 | 10.717427 | 13.395353 | 15.520816 | 17.945078 |
| 71.96 | 2.995572 | 4.894228 | 5.992134 | 8.541044 | 10.713023 | 13.398353 | 15.480874 | 17.819350 |
| 72.06 | 2.999705 | 4.868819 | 6.008876 | 8.567746 | 10.735968 | 13.424782 | 15.556313 | 17.936067 |
| 72.16 | 2.989255 | 4.886875 | 6.009578 | 8.567087 | 10.710174 | 13.421516 | 15.556196 | 17.860869 |
| 72.26 | 3.007276 | 4.874383 | 5.991949 | 8.528453 | 10.748477 | 13.398741 | 15.570925 | 17.882211 |
| 72.36 | 3.000164 | 4.869610 | 6.017083 | 8.521888 | 10.687229 | 13.487274 | 15.461146 | 17.901112 |
| 72.46 | 2.992106 | 4.865271 | 5.980686 | 8.544063 | 10.748172 | 13.400062 | 15.526943 | 17.903013 |
| 72.56 | 3.005110 | 4.870323 | 6.017651 | 8.570975 | 10.686961 | 13.419489 | 15.542189 | 17.970912 |
| 72.66 | 3.000178 | 4.873352 | 5.980024 | 8.565750 | 10.708566 | 13.412863 | 15.563686 | 17.865006 |
| 72.76 | 3.005047 | 4.855077 | 6.003609 | 8.568904 | 10.716462 | 13.438265 | 15.544067 | 17.882039 |
| 72.86 | 3.001173 | 4.862765 | 6.031596 | 8.551392 | 10.684766 | 13.381855 | 15.569667 | 17.821804 |
| 72.96 | 2.985808 | 4.866558 | 5.999359 | 8.521524 | 10.713544 | 13.432732 | 15.567281 | 17.955795 |
| 73.06 | 3.008746 | 4.865303 | 6.027069 | 8.537687 | 10.747195 | 13.483399 | 15.555498 | 17.874327 |
| 73.16 | 2.990254 | 4.876330 | 6.026050 | 8.570640 | 10.691011 | 13.485887 | 15.564350 | 17.861283 |
| 73.26 | 2.995666 | 4.892349 | 6.027471 | 8.504348 | 10.729640 | 13.474965 | 15.462334 | 17.910463 |
| 73.36 | 2.989457 | 4.879341 | 6.030711 | 8.502982 | 10.754980 | 13.389227 | 15.572600 | 17.915562 |
| 73.46 | 3.008568 | 4.877856 | 6.029085 | 8.526766 | 10.694530 | 13.446879 | 15.554601 | 17.817625 |
| 73.56 | 2.994083 | 4.860412 | 6.008741 | 8.569999 | 10.740953 | 13.431748 | 15.566290 | 17.852133 |
| 73.66 | 2.988257 | 4.892756 | 6.033474 | 8.533696 | 10.665942 | 13.384353 | 15.454682 | 17.837171 |
| 73.76 | 2.991090 | 4.896854 | 6.020322 | 8.534719 | 10.682721 | 13.420715 | 15.465322 | 17.927637 |
| 73.86 | 2.987029 | 4.870273 | 6.017458 | 8.551414 | 10.750029 | 13.477466 | 15.575073 | 17.834310 |
| 73.96 | 3.006251 | 4.862929 | 5.986469 | 8.510949 | 10.758498 | 13.471014 | 15.579396 | 17.858118 |
| 74.06 | 2.984145 | 4.888556 | 6.020521 | 8.549559 | 10.690514 | 13.389173 | 15.476764 | 17.937479 |
| 74.16 | 2.989424 | 4.894563 | 6.027047 | 8.551062 | 10.715369 | 13.469882 | 15.484812 | 17.911202 |
| 74.26 | 3.006143 | 4.869235 | 6.001949 | 8.520449 | 10.669605 | 13.415094 | 15.451954 | 17.858698 |
| 74.36 | 2.985830 | 4.855914 | 6.026212 | 8.552987 | 10.724772 | 13.454044 | 15.552969 | 17.972731 |
| 74.46 | 2.989125 | 4.854596 | 6.010822 | 8.547553 | 10.703669 | 13.494819 | 15.530913 | 17.867995 |
| 74.56 | 2.986083 | 4.890079 | 5.985814 | 8.547046 | 10.704104 | 13.484937 | 15.541538 | 17.920498 |
| 74.66 | 3.003401 | 4.862890 | 6.014676 | 8.549527 | 10.734010 | 13.437307 | 15.479403 | 17.836636 |
| 74.76 | 2.990890 | 4.881543 | 6.021429 | 8.552321 | 10.724374 | 13.495901 | 15.487023 | 17.910877 |
| 74.86 | 3.008751 | 4.888760 | 6.033231 | 8.572100 | 10.746699 | 13.436905 | 15.494721 | 17.968294 |
| 74.96 | 3.009362 | 4.882523 | 5.991757 | 8.547871 | 10.754080 | 13.480711 | 15.517424 | 17.868468 |
| 75.06 | 3.000779 | 4.868495 | 5.997140 | 8.532153 | 10.684039 | 13.422305 | 15.513596 | 17.902579 |
| 75.16 | 2.990074 | 4.882454 | 6.029099 | 8.550758 | 10.731279 | 13.387347 | 15.563510 | 17.844328 |
| 75.26 | 2.992185 | 4.895636 | 6.004642 | 8.560290 | 10.756188 | 13.398463 | 15.449169 | 17.939125 |
| 75.36 | 2.986118 | 4.859172 | 5.992376 | 8.521257 | 10.752975 | 13.481901 | 15.472660 | 17.851344 |
| 75.46 | 3.003351 | 4.865431 | 6.018430 | 8.551603 | 10.759707 | 13.383212 | 15.507385 | 17.823714 |
| 75.56 | 2.984808 | 4.878512 | 5.998860 | 8.523390 | 10.743956 | 13.433936 | 15.520220 | 17.965806 |
| 75.66 | 3.003958 | 4.870060 | 5.981667 | 8.555152 | 10.705136 | 13.434464 | 15.587183 | 17.971236 |
| 75.76 | 2.993530 | 4.865813 | 6.012248 | 8.565421 | 10.686117 | 13.488474 | 15.523734 | 17.843715 |
| 75.86 | 2.991894 | 4.866717 | 6.002818 | 8.568477 | 10.682899 | 13.480550 | 15.451038 | 17.890512 |
| 75.96 | 2.985885 | 4.873819 | 6.008951 | 8.522113 | 10.693240 | 13.477291 | 15.549598 | 17.945309 |
| 76.06 | 2.986466 | 4.886122 | 5.995623 | 8.553338 | 10.739590 | 13.388011 | 15.545591 | 17.973166 |
| 76.16 | 2.988391 | 4.884470 | 5.984255 | 8.521169 | 10.695610 | 13.427650 | 15.531728 | 17.886184 |
| 76.26 | 2.988815 | 4.890314 | 6.030938 | 8.561742 | 10.697633 | 13.446767 | 15.548743 | 17.879618 |
| 76.36 | 2.985531 | 4.859227 | 6.021006 | 8.554699 | 10.721324 | 13.483901 | 15.464121 | 17.927522 |
| 76.46 | 2.996988 | 4.865162 | 6.000373 | 8.578697 | 10.686860 | 13.388136 | 15.545862 | 17.883985 |
| 76.56 | 2.997910 | 4.894337 | 6.001305 | 8.570328 | 10.708019 | 13.473051 | 15.532568 | 17.962646 |
| 76.66 | 2.995547 | 4.892237 | 6.012534 | 8.564741 | 10.723971 | 13.425597 | 15.548816 | 17.887646 |
| 76.76 | 3.002670 | 4.896678 | 5.990803 | 8.571240 | 10.678667 | 13.398909 | 15.513787 | 17.843425 |
| 76.86 | 2.997810 | 4.878246 | 6.022271 | 8.535596 | 10.700845 | 13.416560 | 15.487209 | 17.857786 |
| 76.96 | 2.997514 | 4.866367 | 6.006552 | 8.557939 | 10.697211 | 13.377305 | 15.470473 | 17.848778 |
| 77.06 | 2.987951 | 4.875057 | 6.008390 | 8.556957 | 10.730331 | 13.486035 | 15.475512 | 17.929884 |
| 77.16 | 2.986609 | 4.865096 | 6.001702 | 8.565040 | 10.694525 | 13.454172 | 15.566000 | 17.880896 |
| 77.26 | 2.995028 | 4.875128 | 6.030292 | 8.577984 | 10.700019 | 13.461274 | 15.517369 | 17.894560 |
| 77.36 | 3.001127 | 4.890640 | 6.006444 | 8.566863 | 10.703144 | 13.475237 | 15.463065 | 17.969519 |
| 77.46 | 2.998247 | 4.859599 | 6.028151 | 8.552507 | 10.675845 | 13.430121 | 15.576261 | 17.956128 |
| 77.56 | 2.989265 | 4.889657 | 5.991748 | 8.525608 | 10.717795 | 13.449786 | 15.510719 | 17.826511 |
| 77.66 | 3.006528 | 4.873584 | 6.009783 | 8.574127 | 10.727329 | 13.434208 | 15.546018 | 17.908143 |
| 77.76 | 3.006178 | 4.859765 | 5.989312 | 8.562313 | 10.735512 | 13.407162 | 15.541184 | 17.818579 |
| 77.86 | 3.003289 | 4.887094 | 6.025065 | 8.513238 | 10.699342 | 13.403014 | 15.571516 | 17.933755 |
| 77.96 | 3.002273 | 4.867447 | 6.021131 | 8.538994 | 10.697196 | 13.405672 | 15.523849 | 17.973963 |
| 78.06 | 2.993723 | 4.877519 | 6.007469 | 8.565006 | 10.707657 | 13.496156 | 15.570041 | 17.926640 |
| 78.16 | 2.999261 | 4.888675 | 6.008969 | 8.529291 | 10.682041 | 13.485546 | 15.454301 | 17.859767 |
| 78.26 | 2.995342 | 4.882395 | 5.996709 | 8.555437 | 10.678530 | 13.455168 | 15.568860 | 17.819823 |
| 78.36 | 3.010047 | 4.873227 | 6.015643 | 8.579655 | 10.698793 | 13.421020 | 15.505740 | 17.915446 |
| 78.46 | 3.007065 | 4.889673 | 6.005672 | 8.527601 | 10.666552 | 13.420024 | 15.485488 | 17.898855 |
| 78.56 | 3.009312 | 4.868527 | 5.997542 | 8.571272 | 10.737893 | 13.381203 | 15.564523 | 17.941913 |
| 78.66 | 3.006171 | 4.880154 | 6.029974 | 8.503861 | 10.731504 | 13.446751 | 15.561269 | 17.940966 |
| 78.76 | 2.991728 | 4.876916 | 6.030420 | 8.522646 | 10.706680 | 13.495773 | 15.468664 | 17.860661 |
| 78.86 | 3.007479 | 4.882121 | 5.985083 | 8.564791 | 10.712821 | 13.486881 | 15.519179 | 17.954924 |
| 78.96 | 3.010086 | 4.879496 | 6.010859 | 8.520918 | 10.739680 | 13.409576 | 15.579648 | 17.942082 |
| 79.06 | 2.988794 | 4.892392 | 6.001776 | 8.540064 | 10.733950 | 13.471615 | 15.531664 | 17.866173 |
| 79.16 | 2.993022 | 4.884773 | 5.999994 | 8.570203 | 10.752654 | 13.425151 | 15.495065 | 17.928914 |
| 79.26 | 3.010031 | 4.880649 | 6.002968 | 8.549819 | 10.706107 | 13.386518 | 15.553716 | 17.932296 |
| 79.36 | 2.989427 | 4.864952 | 6.003066 | 8.555439 | 10.751116 | 13.390282 | 15.565771 | 17.825064 |
| 79.46 | 2.993266 | 4.891163 | 5.983562 | 8.548289 | 10.733450 | 13.486622 | 15.554960 | 17.939803 |
| 79.56 | 2.996783 | 4.866905 | 5.981062 | 8.549450 | 10.696566 | 13.488756 | 15.570161 | 17.932720 |
| 79.66 | 3.002060 | 4.889326 | 6.009754 | 8.533289 | 10.690034 | 13.438715 | 15.469898 | 17.913627 |
| 79.76 | 2.992497 | 4.879549 | 6.003318 | 8.549762 | 10.742078 | 13.402184 | 15.494855 | 17.924653 |
| 79.86 | 2.996519 | 4.886357 | 6.022826 | 8.541080 | 10.688223 | 13.428361 | 15.485241 | 17.944185 |
| 79.96 | 3.000807 | 4.877335 | 5.989838 | 8.508183 | 10.709064 | 13.477524 | 15.581724 | 17.824532 |
| 80.06 | 2.994707 | 4.859159 | 5.999761 | 8.566736 | 10.744594 | 13.490323 | 15.511864 | 17.839285 |
| 80.16 | 3.000660 | 4.895101 | 5.980940 | 8.503907 | 10.740756 | 13.444383 | 15.519092 | 17.950063 |
| 80.26 | 2.995768 | 4.861336 | 5.994177 | 8.523280 | 10.739300 | 13.452163 | 15.463141 | 17.898905 |
| 80.36 | 3.008387 | 4.856308 | 6.027767 | 8.557270 | 10.670807 | 13.474608 | 15.521351 | 17.948841 |
| 80.46 | 2.985763 | 4.880104 | 5.990780 | 8.514712 | 10.722828 | 13.396906 | 15.557429 | 17.822774 |
| 80.56 | 3.000327 | 4.884298 | 5.997364 | 8.568197 | 10.690772 | 13.469553 | 15.538744 | 17.926699 |
| 80.66 | 2.994737 | 4.886843 | 6.007982 | 8.530466 | 10.725239 | 13.433554 | 15.464504 | 17.972471 |
| 80.76 | 2.992174 | 4.893726 | 6.011084 | 8.556010 | 10.700867 | 13.411186 | 15.566878 | 17.878392 |
| 80.86 | 2.984772 | 4.873239 | 5.997461 | 8.531322 | 10.742141 | 13.421950 | 15.584636 | 17.956810 |
| 80.96 | 2.988113 | 4.887501 | 5.994713 | 8.552938 | 10.677152 | 13.429980 | 15.474672 | 17.930413 |
| 81.06 | 3.002887 | 4.861406 | 5.984431 | 8.554847 | 10.735047 | 13.473305 | 15.451725 | 17.851354 |
| 81.16 | 2.986611 | 4.870566 | 6.016203 | 8.545431 | 10.745438 | 13.397233 | 15.528082 | 17.966433 |
| 81.26 | 2.996132 | 4.879834 | 5.997819 | 8.571100 | 10.705455 | 13.496514 | 15.568463 | 17.891845 |
| 81.36 | 3.007758 | 4.866341 | 6.029782 | 8.552946 | 10.731288 | 13.434367 | 15.499447 | 17.852473 |
| 81.46 | 3.003063 | 4.856228 | 5.990331 | 8.579824 | 10.697859 | 13.393050 | 15.477235 | 17.951174 |
| 81.56 | 2.999865 | 4.874059 | 5.997802 | 8.567961 | 10.744835 | 13.462246 | 15.510638 | 17.917900 |
| 81.66 | 3.006869 | 4.896314 | 6.001674 | 8.510086 | 10.729273 | 13.405613 | 15.513170 | 17.842391 |
| 81.76 | 2.989873 | 4.885653 | 6.012087 | 8.578577 | 10.684432 | 13.469955 | 15.514652 | 17.917746 |
| 81.86 | 2.986350 | 4.868002 | 6.029507 | 8.561202 | 10.748892 | 13.455649 | 15.526721 | 17.924327 |
| 81.96 | 2.995338 | 4.859916 | 5.988899 | 8.551602 | 10.683178 | 13.478533 | 15.480259 | 17.897605 |
| 82.06 | 2.990513 | 4.861728 | 6.002555 | 8.521750 | 10.689606 | 13.424256 | 15.491057 | 17.914647 |
| 82.16 | 2.986540 | 4.890005 | 6.014844 | 8.562488 | 10.758378 | 13.481966 | 15.468028 | 17.906850 |
| 82.26 | 2.997002 | 4.885236 | 6.002771 | 8.571654 | 10.736089 | 13.475742 | 15.511451 | 17.969428 |
| 82.36 | 2.993461 | 4.862879 | 5.994547 | 8.526496 | 10.709504 | 13.431516 | 15.467083 | 17.883264 |
| 82.46 | 2.983836 | 4.865251 | 5.987878 | 8.519980 | 10.749745 | 13.395716 | 15.542300 | 17.960750 |
| 82.56 | 3.004395 | 4.863926 | 6.008088 | 8.577243 | 10.746571 | 13.384466 | 15.488814 | 17.870986 |
| 82.66 | 2.984727 | 4.869519 | 6.031168 | 8.546322 | 10.754809 | 13.476993 | 15.498506 | 17.911170 |
| 82.76 | 2.999416 | 4.861480 | 5.989906 | 8.539168 | 10.723700 | 13.442134 | 15.537079 | 17.873306 |
| 82.86 | 3.006596 | 4.892316 | 6.023184 | 8.575271 | 10.730442 | 13.459539 | 15.470488 | 17.926977 |
| 82.96 | 2.986868 | 4.896350 | 6.001294 | 8.546723 | 10.684291 | 13.414128 | 15.532996 | 17.959282 |
| 83.06 | 2.996340 | 4.877710 | 6.027398 | 8.532783 | 10.751498 | 13.406839 | 15.524566 | 17.839296 |
| 83.16 | 3.000079 | 4.871682 | 5.991715 | 8.545322 | 10.749393 | 13.477034 | 15.469409 | 17.935570 |
| 83.26 | 2.985399 | 4.878971 | 6.021377 | 8.557708 | 10.710384 | 13.416943 | 15.571504 | 17.915629 |
| 83.36 | 2.994160 | 4.883643 | 6.004525 | 8.507877 | 10.688580 | 13.391437 | 15.459873 | 17.819050 |
| 83.46 | 2.991025 | 4.865208 | 5.987324 | 8.575894 | 10.718918 | 13.470173 | 15.558045 | 17.875625 |
| 83.56 | 2.998643 | 4.897334 | 6.018338 | 8.506030 | 10.709153 | 13.406851 | 15.586978 | 17.945695 |
| 83.66 | 3.000441 | 4.886170 | 6.011389 | 8.519128 | 10.758072 | 13.404692 | 15.534000 | 17.957389 |
| 83.76 | 2.990555 | 4.887664 | 6.002926 | 8.577393 | 10.680915 | 13.389295 | 15.567344 | 17.860259 |
| 83.86 | 2.999078 | 4.872847 | 6.004271 | 8.552107 | 10.736364 | 13.395231 | 15.553155 | 17.914627 |
| 83.96 | 2.991276 | 4.868065 | 6.021008 | 8.520670 | 10.755100 | 13.382846 | 15.468897 | 17.908855 |
| 84.06 | 2.986805 | 4.864154 | 6.033755 | 8.512847 | 10.760905 | 13.386347 | 15.495116 | 17.881244 |
| 84.16 | 3.007181 | 4.882881 | 6.013846 | 8.579855 | 10.715969 | 13.479390 | 15.558066 | 17.825862 |
| 84.26 | 2.984623 | 4.880387 | 6.026532 | 8.514585 | 10.670116 | 13.406084 | 15.573885 | 17.888850 |
| 84.36 | 2.994210 | 4.893950 | 6.005078 | 8.574410 | 10.726682 | 13.420757 | 15.476988 | 17.879709 |
| 84.46 | 2.989545 | 4.867303 | 6.028209 | 8.541063 | 10.712917 | 13.402495 | 15.464763 | 17.952452 |
| 84.56 | 3.000912 | 4.893948 | 6.007030 | 8.536824 | 10.725555 | 13.385458 | 15.563717 | 17.842093 |
| 84.66 | 3.003153 | 4.860197 | 6.004280 | 8.570241 | 10.673654 | 13.493716 | 15.516985 | 17.821774 |
| 84.76 | 2.993547 | 4.886825 | 5.985561 | 8.547013 | 10.713446 | 13.407006 | 15.567624 | 17.903214 |
| 84.86 | 2.991444 | 4.874884 | 6.006777 | 8.574296 | 10.695164 | 13.449379 | 15.515099 | 17.957466 |
| 84.96 | 2.994220 | 4.893290 | 6.024824 | 8.510532 | 10.683698 | 13.381487 | 15.542775 | 17.820015 |
| 85.06 | 3.004223 | 4.855791 | 6.031477 | 8.524434 | 10.687306 | 13.468526 | 15.472779 | 17.922281 |
| 85.16 | 2.989928 | 4.875344 | 5.981295 | 8.550621 | 10.760852 | 13.443245 | 15.458730 | 17.852443 |
| 85.26 | 2.991467 | 4.878522 | 6.031699 | 8.507845 | 10.730718 | 13.424796 | 15.573205 | 17.932036 |
| 85.36 | 3.007895 | 4.894831 | 5.985517 | 8.556282 | 10.680482 | 13.483063 | 15.538042 | 17.835389 |
| 85.46 | 3.008463 | 4.857427 | 5.984062 | 8.537237 | 10.706200 | 13.474515 | 15.519684 | 17.932412 |
| 85.56 | 3.009305 | 4.870075 | 6.000905 | 8.525427 | 10.736344 | 13.484413 | 15.506606 | 17.933781 |
| 85.66 | 3.008744 | 4.866957 | 5.991427 | 8.578247 | 10.741933 | 13.463832 | 15.561369 | 17.929765 |
| 85.76 | 2.993750 | 4.870514 | 6.024372 | 8.524400 | 10.745239 | 13.437025 | 15.517465 | 17.821722 |
| 85.86 | 2.999612 | 4.885648 | 6.029804 | 8.542451 | 10.756518 | 13.485062 | 15.496360 | 17.968475 |
| 85.96 | 2.992070 | 4.884233 | 5.993857 | 8.553157 | 10.747441 | 13.483139 | 15.509543 | 17.876358 |
| 86.06 | 3.005304 | 4.892247 | 6.028494 | 8.539657 | 10.677118 | 13.439137 | 15.512909 | 17.873929 |
| 86.16 | 2.984296 | 4.876900 | 5.983359 | 8.579319 | 10.715264 | 13.424728 | 15.585330 | 17.960055 |
| 86.26 | 3.007375 | 4.880049 | 6.014527 | 8.559053 | 10.745303 | 13.377047 | 15.562836 | 17.970870 |
| 86.36 | 3.002920 | 4.891017 | 6.017999 | 8.579407 | 10.752646 | 13.442186 | 15.564397 | 17.962991 |
| 86.46 | 2.994738 | 4.875209 | 6.030403 | 8.545187 | 10.729454 | 13.428387 | 15.496271 | 17.881461 |
| 86.56 | 2.993025 | 4.856905 | 5.996352 | 8.564356 | 10.687479 | 13.466880 | 15.545763 | 17.963169 |
| 86.66 | 3.002532 | 4.893117 | 6.004717 | 8.521500 | 10.748764 | 13.397907 | 15.503050 | 17.825547 |
| 86.76 | 3.008807 | 4.857315 | 6.010388 | 8.522032 | 10.682075 | 13.454417 | 15.490954 | 17.896522 |
| 86.86 | 3.000368 | 4.880362 | 6.013154 | 8.554809 | 10.725392 | 13.436866 | 15.508866 | 17.849623 |
| 86.96 | 2.998764 | 4.879811 | 6.026224 | 8.544408 | 10.715657 | 13.476774 | 15.577947 | 17.948206 |
| 87.06 | 2.987140 | 4.890642 | 5.989900 | 8.552833 | 10.729789 | 13.484982 | 15.573561 | 17.850780 |
| 87.16 | 2.993540 | 4.862448 | 6.031930 | 8.535606 | 10.751782 | 13.381143 | 15.516627 | 17.897182 |
| 87.26 | 2.986355 | 4.871111 | 5.987389 | 8.523468 | 10.724588 | 13.416213 | 15.516295 | 17.828231 |
| 87.36 | 2.990464 | 4.854699 | 5.982421 | 8.516506 | 10.743179 | 13.441914 | 15.461507 | 17.969433 |
| 87.46 | 2.986164 | 4.874414 | 6.026151 | 8.530005 | 10.715683 | 13.426877 | 15.559111 | 17.895602 |
| 87.56 | 2.985162 | 4.868378 | 6.032837 | 8.529696 | 10.678737 | 13.460379 | 15.548712 | 17.820465 |
| 87.66 | 2.993125 | 4.875470 | 6.016175 | 8.513237 | 10.701900 | 13.413667 | 15.517910 | 17.936555 |
| 87.76 | 3.000802 | 4.880129 | 6.016498 | 8.518507 | 10.740465 | 13.460697 | 15.582910 | 17.919498 |
| 87.86 | 3.003107 | 4.878252 | 6.016942 | 8.549789 | 10.751280 | 13.403168 | 15.476928 | 17.883483 |
| 87.96 | 2.994502 | 4.861534 | 6.034001 | 8.547335 | 10.671441 | 13.418310 | 15.580084 | 17.835256 |
| 88.06 | 3.001873 | 4.862126 | 6.016703 | 8.507421 | 10.713507 | 13.387208 | 15.575793 | 17.962540 |
| 88.16 | 3.009134 | 4.885506 | 6.000038 | 8.553480 | 10.760959 | 13.448582 | 15.467226 | 17.961151 |
| 88.26 | 2.991318 | 4.866294 | 6.004535 | 8.542922 | 10.739332 | 13.448308 | 15.496929 | 17.904734 |
| 88.36 | 2.988685 | 4.874582 | 6.012268 | 8.558426 | 10.671752 | 13.426187 | 15.478142 | 17.951239 |
| 88.46 | 2.989962 | 4.892959 | 5.982408 | 8.508938 | 10.686991 | 13.428421 | 15.543502 | 17.907684 |
| 88.56 | 2.988158 | 4.875372 | 5.988199 | 8.506713 | 10.753691 | 13.409608 | 15.550054 | 17.849021 |
| 88.66 | 2.988561 | 4.879575 | 6.010987 | 8.524032 | 10.670708 | 13.411741 | 15.537029 | 17.871653 |
| 88.76 | 2.983587 | 4.864229 | 6.023786 | 8.520043 | 10.715441 | 13.481700 | 15.528522 | 17.918496 |
| 88.86 | 3.004196 | 4.896396 | 6.020685 | 8.574222 | 10.739660 | 13.407643 | 15.527373 | 17.847813 |
| 88.96 | 2.997441 | 4.889389 | 6.001400 | 8.551661 | 10.685763 | 13.442622 | 15.495525 | 17.849576 |
| 89.06 | 2.997127 | 4.884508 | 6.021442 | 8.578404 | 10.748329 | 13.428600 | 15.547661 | 17.862498 |
| 89.16 | 3.005632 | 4.879893 | 5.982939 | 8.544892 | 10.711529 | 13.441411 | 15.488200 | 17.898608 |
| 89.26 | 2.987309 | 4.860116 | 6.022529 | 8.558854 | 10.680778 | 13.376970 | 15.561034 | 17.934183 |
| 89.36 | 2.993709 | 4.866752 | 6.006101 | 8.544059 | 10.683711 | 13.430703 | 15.574571 | 17.830715 |
| 89.46 | 3.007802 | 4.869671 | 5.990325 | 8.525345 | 10.752869 | 13.412503 | 15.489550 | 17.861741 |
| 89.56 | 2.998049 | 4.884564 | 6.007170 | 8.579644 | 10.719778 | 13.430987 | 15.464214 | 17.931753 |
| 89.66 | 3.001393 | 4.873125 | 5.983384 | 8.518525 | 10.706054 | 13.394648 | 15.535203 | 17.963260 |
| 89.76 | 2.997412 | 4.858345 | 6.003770 | 8.567957 | 10.686663 | 13.441937 | 15.477646 | 17.933839 |
| 89.86 | 3.007702 | 4.869074 | 5.995761 | 8.504862 | 10.732398 | 13.476918 | 15.554682 | 17.928788 |
| 89.96 | 2.985749 | 4.855831 | 5.995899 | 8.541486 | 10.744253 | 13.482732 | 15.470250 | 17.895726 |
| 90.06 | 2.990278 | 4.879274 | 6.011242 | 8.519480 | 10.759281 | 13.393263 | 15.490181 | 17.838375 |
| 90.16 | 3.007951 | 4.888755 | 5.992291 | 8.521230 | 10.692152 | 13.430045 | 15.465223 | 17.884380 |
| 90.26 | 2.995393 | 4.890554 | 6.024129 | 8.541339 | 10.759890 | 13.411891 | 15.493290 | 17.944769 |
| 90.36 | 3.005008 | 4.869483 | 6.002825 | 8.508807 | 10.700545 | 13.421123 | 15.517096 | 17.882734 |
| 90.46 | 3.002136 | 4.857796 | 6.008111 | 8.540497 | 10.695675 | 13.425644 | 15.565028 | 17.871418 |
| 90.56 | 3.003604 | 4.864946 | 5.998299 | 8.547673 | 10.760016 | 13.487122 | 15.465389 | 17.848818 |
| 90.66 | 2.998204 | 4.890201 | 6.002393 | 8.531361 | 10.732065 | 13.397612 | 15.469767 | 17.875979 |
| 90.76 | 2.988578 | 4.876083 | 5.982365 | 8.550460 | 10.702068 | 13.414852 | 15.561150 | 17.895571 |
| 90.86 | 2.998648 | 4.878143 | 5.993645 | 8.575939 | 10.694133 | 13.480143 | 15.462617 | 17.847700 |
| 90.96 | 3.004437 | 4.870007 | 6.021170 | 8.549397 | 10.718988 | 13.392087 | 15.459689 | 17.830846 |
| 91.06 | 2.996301 | 4.855915 | 6.001074 | 8.504137 | 10.707752 | 13.433208 | 15.527649 | 17.975579 |
| 91.16 | 2.995104 | 4.868727 | 5.984945 | 8.573777 | 10.682671 | 13.458481 | 15.576487 | 17.936336 |
| 91.26 | 2.988228 | 4.881571 | 5.994167 | 8.523740 | 10.685955 | 13.408075 | 15.567708 | 17.902442 |
| 91.36 | 3.001773 | 4.870085 | 6.022361 | 8.522862 | 10.710077 | 13.410645 | 15.523196 | 17.849853 |
| 91.46 | 2.989011 | 4.864598 | 6.033586 | 8.528057 | 10.689001 | 13.403295 | 15.465039 | 17.872725 |
| 91.56 | 3.008827 | 4.854492 | 6.019471 | 8.530400 | 10.722135 | 13.390355 | 15.536809 | 17.902807 |
| 91.66 | 3.002500 | 4.869433 | 6.033291 | 8.565970 | 10.745220 | 13.410737 | 15.579366 | 17.854932 |
| 91.76 | 3.007870 | 4.879058 | 6.005168 | 8.550006 | 10.705117 | 13.420663 | 15.486354 | 17.844992 |
| 91.86 | 2.991803 | 4.896014 | 6.029806 | 8.527901 | 10.722279 | 13.465916 | 15.529774 | 17.883853 |
| 91.96 | 2.988761 | 4.889525 | 5.997682 | 8.576206 | 10.743689 | 13.385083 | 15.508703 | 17.866464 |
| 92.06 | 2.987059 | 4.869001 | 6.011559 | 8.553186 | 10.745311 | 13.491237 | 15.504193 | 17.906665 |
| 92.16 | 2.989331 | 4.860536 | 5.991943 | 8.508660 | 10.707579 | 13.419736 | 15.502614 | 17.907351 |
| 92.26 | 3.007088 | 4.886006 | 6.015517 | 8.565288 | 10.712012 | 13.384828 | 15.481960 | 17.831934 |
| 92.36 | 2.998968 | 4.871621 | 6.007998 | 8.573475 | 10.700790 | 13.483534 | 15.469572 | 17.832855 |
| 92.46 | 2.993877 | 4.897339 | 6.011063 | 8.563009 | 10.716818 | 13.425784 | 15.556792 | 17.954541 |
| 92.56 | 3.004295 | 4.896734 | 6.033988 | 8.522125 | 10.702893 | 13.399345 | 15.462560 | 17.908947 |
| 92.66 | 3.003526 | 4.879531 | 6.017930 | 8.566338 | 10.741231 | 13.389428 | 15.466577 | 17.902024 |
| 92.76 | 2.989119 | 4.863794 | 5.997716 | 8.522123 | 10.713121 | 13.407992 | 15.541740 | 17.842298 |
| 92.86 | 3.004992 | 4.864473 | 6.008289 | 8.507164 | 10.735928 | 13.448617 | 15.585224 | 17.870850 |
| 92.96 | 2.986969 | 4.877985 | 5.983274 | 8.543460 | 10.733215 | 13.391078 | 15.570907 | 17.947031 |
| 93.06 | 3.008944 | 4.873322 | 6.000235 | 8.554448 | 10.732004 | 13.440136 | 15.517121 | 17.833002 |
| 93.16 | 2.988278 | 4.857897 | 5.985035 | 8.564644 | 10.699278 | 13.431739 | 15.579227 | 17.827526 |
| 93.26 | 3.000610 | 4.891144 | 5.987522 | 8.537064 | 10.715326 | 13.396294 | 15.511274 | 17.888460 |
| 93.36 | 2.986705 | 4.869284 | 5.984636 | 8.560928 | 10.761250 | 13.470273 | 15.467486 | 17.874201 |
| 93.46 | 3.005490 | 4.880018 | 6.014759 | 8.554002 | 10.703109 | 13.416859 | 15.579082 | 17.921686 |
| 93.56 | 2.991090 | 4.880021 | 6.002924 | 8.516001 | 10.729485 | 13.412624 | 15.544175 | 17.970554 |
| 93.66 | 2.988416 | 4.865484 | 6.031119 | 8.561006 | 10.760413 | 13.495234 | 15.537620 | 17.892252 |
| 93.76 | 2.984627 | 4.869728 | 5.990928 | 8.576489 | 10.748732 | 13.392237 | 15.565850 | 17.878659 |
| 93.86 | 2.984476 | 4.890544 | 6.020824 | 8.568672 | 10.686096 | 13.477711 | 15.571761 | 17.831292 |
| 93.96 | 2.983438 | 4.879245 | 5.992866 | 8.512115 | 10.718765 | 13.419927 | 15.487941 | 17.837113 |
| 94.06 | 2.988088 | 4.878467 | 5.990095 | 8.544806 | 10.708712 | 13.476903 | 15.464728 | 17.850241 |
| 94.16 | 2.983413 | 4.876454 | 5.991427 | 8.522800 | 10.684743 | 13.496364 | 15.572381 | 17.862630 |
| 94.26 | 2.992394 | 4.886870 | 6.003210 | 8.564283 | 10.675596 | 13.446209 | 15.453192 | 17.951964 |
| 94.36 | 2.998136 | 4.875119 | 6.001738 | 8.564202 | 10.730888 | 13.388234 | 15.585055 | 17.947250 |
| 94.46 | 2.984688 | 4.892546 | 5.991542 | 8.572294 | 10.674084 | 13.427173 | 15.531178 | 17.974887 |
| 94.56 | 3.003932 | 4.864648 | 6.031109 | 8.511825 | 10.681609 | 13.461537 | 15.501408 | 17.967108 |
| 94.66 | 2.984164 | 4.892368 | 5.992086 | 8.548015 | 10.686696 | 13.392926 | 15.503256 | 17.908808 |
| 94.76 | 3.000316 | 4.864497 | 6.000763 | 8.556392 | 10.741809 | 13.429592 | 15.494728 | 17.884174 |
| 94.86 | 2.998384 | 4.874322 | 5.997788 | 8.568210 | 10.704895 | 13.390450 | 15.535501 | 17.909529 |
| 94.96 | 2.987280 | 4.877898 | 6.009124 | 8.557376 | 10.718547 | 13.437513 | 15.453475 | 17.970811 |
| 95.06 | 3.003888 | 4.863479 | 5.983910 | 8.571486 | 10.719240 | 13.386714 | 15.578867 | 17.826580 |
| 95.16 | 2.991808 | 4.876570 | 6.006650 | 8.570157 | 10.677972 | 13.411681 | 15.491158 | 17.882881 |
| 95.26 | 2.985273 | 4.891858 | 6.029271 | 8.563620 | 10.731740 | 13.434159 | 15.501479 | 17.874625 |
| 95.36 | 3.006939 | 4.866276 | 6.030373 | 8.568477 | 10.679695 | 13.411278 | 15.467599 | 17.925705 |
| 95.46 | 2.997748 | 4.883849 | 6.025477 | 8.512299 | 10.669530 | 13.484877 | 15.545894 | 17.879503 |
| 95.56 | 2.988775 | 4.895336 | 5.987081 | 8.572920 | 10.760592 | 13.406017 | 15.498149 | 17.929190 |
| 95.66 | 2.997871 | 4.867793 | 6.012826 | 8.562962 | 10.758388 | 13.460318 | 15.460012 | 17.928522 |
| 95.76 | 3.001469 | 4.888923 | 6.006060 | 8.569397 | 10.734246 | 13.478995 | 15.472774 | 17.828519 |
| 95.86 | 3.000696 | 4.854762 | 5.984844 | 8.507922 | 10.724413 | 13.393804 | 15.500750 | 17.855713 |
| 95.96 | 2.999558 | 4.862399 | 6.001104 | 8.513781 | 10.731272 | 13.421742 | 15.468240 | 17.824546 |
| 96.06 | 2.991857 | 4.892998 | 6.026433 | 8.574134 | 10.753684 | 13.492448 | 15.465063 | 17.826184 |
| 96.16 | 2.988865 | 4.896834 | 6.023526 | 8.576480 | 10.758461 | 13.485156 | 15.486471 | 17.888771 |
| 96.26 | 3.005052 | 4.865881 | 5.986918 | 8.519965 | 10.706151 | 13.404028 | 15.587666 | 17.874977 |
| 96.36 | 2.984505 | 4.877195 | 6.023009 | 8.524396 | 10.690011 | 13.415445 | 15.462962 | 17.842841 |
| 96.46 | 3.004810 | 4.856355 | 5.998498 | 8.506290 | 10.746815 | 13.390275 | 15.480167 | 17.973249 |
| 96.56 | 3.001534 | 4.881455 | 6.015903 | 8.561883 | 10.760524 | 13.481808 | 15.580507 | 17.882772 |
| 96.66 | 3.005556 | 4.871850 | 6.034134 | 8.549742 | 10.670853 | 13.483769 | 15.483211 | 17.848042 |
| 96.76 | 2.990377 | 4.872029 | 6.029694 | 8.555559 | 10.672538 | 13.438138 | 15.453002 | 17.870097 |
| 96.86 | 2.986654 | 4.885632 | 6.008384 | 8.521336 | 10.683285 | 13.477475 | 15.572705 | 17.886027 |
| 96.96 | 2.988454 | 4.881245 | 6.034584 | 8.525531 | 10.668731 | 13.448162 | 15.568365 | 17.857609 |
| 97.06 | 3.001984 | 4.891408 | 6.008205 | 8.529770 | 10.735920 | 13.382530 | 15.529479 | 17.934276 |
| 97.16 | 2.998660 | 4.894776 | 6.027804 | 8.542282 | 10.745778 | 13.452947 | 15.463454 | 17.942366 |
| 97.26 | 3.002280 | 4.862860 | 6.001642 | 8.540111 | 10.702373 | 13.420755 | 15.568881 | 17.875048 |
| 97.36 | 3.002889 | 4.884389 | 5.986045 | 8.567636 | 10.682937 | 13.435260 | 15.530372 | 17.872842 |
| 97.46 | 2.994780 | 4.895716 | 5.991004 | 8.504676 | 10.762006 | 13.460848 | 15.511145 | 17.962087 |
| 97.56 | 2.994909 | 4.894263 | 6.028324 | 8.517624 | 10.694408 | 13.493208 | 15.584429 | 17.839414 |
| 97.66 | 2.994374 | 4.897319 | 5.984185 | 8.536724 | 10.673381 | 13.398503 | 15.464982 | 17.824009 |
| 97.76 | 3.000073 | 4.890139 | 6.006854 | 8.543772 | 10.702783 | 13.486509 | 15.565632 | 17.955754 |
| 97.86 | 2.999007 | 4.872481 | 6.007102 | 8.580653 | 10.698759 | 13.395357 | 15.544744 | 17.825980 |
| 97.96 | 2.990170 | 4.863824 | 6.031252 | 8.545724 | 10.737115 | 13.446359 | 15.570139 | 17.971462 |
| 98.06 | 3.005345 | 4.862350 | 6.027697 | 8.505689 | 10.759281 | 13.458916 | 15.534073 | 17.833741 |
| 98.16 | 3.005955 | 4.867057 | 6.026240 | 8.559946 | 10.692044 | 13.402071 | 15.508275 | 17.901726 |
| 98.26 | 2.998460 | 4.888144 | 5.986307 | 8.557722 | 10.669753 | 13.424288 | 15.549266 | 17.897103 |
| 98.36 | 2.984986 | 4.868126 | 6.004031 | 8.550091 | 10.710583 | 13.465435 | 15.560019 | 17.819509 |
| 98.46 | 3.005609 | 4.869028 | 6.012557 | 8.559426 | 10.701267 | 13.396083 | 15.524700 | 17.944051 |
| 98.56 | 3.005182 | 4.879811 | 6.029161 | 8.512842 | 10.721196 | 13.452625 | 15.473545 | 17.894253 |
| 98.66 | 2.987513 | 4.864125 | 5.986340 | 8.557840 | 10.700859 | 13.476290 | 15.543137 | 17.827160 |
| 98.76 | 2.999188 | 4.873755 | 6.024310 | 8.550521 | 10.740790 | 13.432077 | 15.527323 | 17.937314 |
| 98.86 | 2.986313 | 4.881016 | 6.003091 | 8.559466 | 10.736166 | 13.494050 | 15.461144 | 17.881638 |
| 98.96 | 3.003624 | 4.860396 | 5.991158 | 8.540183 | 10.737442 | 13.493850 | 15.478835 | 17.927169 |
| 99.06 | 2.983969 | 4.870491 | 5.999050 | 8.525552 | 10.711072 | 13.395744 | 15.480555 | 17.823671 |
| 99.16 | 2.985026 | 4.868836 | 5.981497 | 8.516339 | 10.679080 | 13.480352 | 15.550035 | 17.942581 |
| 99.26 | 2.994651 | 4.883920 | 6.030126 | 8.519129 | 10.748325 | 13.464555 | 15.561990 | 17.886954 |
| 99.36 | 2.987131 | 4.867613 | 6.015868 | 8.568925 | 10.675995 | 13.450102 | 15.571214 | 17.894851 |
| 99.46 | 2.992771 | 4.870096 | 6.019020 | 8.542121 | 10.685249 | 13.393977 | 15.489997 | 17.846935 |
| 99.56 | 2.985569 | 4.871527 | 6.025275 | 8.512243 | 10.761423 | 13.391015 | 15.545924 | 17.836493 |
| 99.66 | 2.990936 | 4.859092 | 6.005090 | 8.574541 | 10.758517 | 13.407667 | 15.540229 | 17.942018 |
| 99.76 | 2.985049 | 4.878186 | 6.013883 | 8.538461 | 10.735301 | 13.482454 | 15.463102 | 17.824842 |
| 99.86 | 2.984010 | 4.882525 | 6.006919 | 8.557893 | 10.714779 | 13.431899 | 15.565620 | 17.867138 |
| 99.96 | 2.998437 | 4.886250 | 5.994825 | 8.555231 | 10.742899 | 13.396983 | 15.535175 | 17.960715 |
| 100.06 | 2.988205 | 4.869777 | 5.992958 | 8.571912 | 10.746949 | 13.486026 | 15.567493 | 17.933798 |
| 100.16 | 2.989245 | 4.868801 | 5.994147 | 8.545673 | 10.755175 | 13.435519 | 15.530426 | 17.819555 |
| 100.26 | 3.009843 | 4.873534 | 6.034571 | 8.571051 | 10.675919 | 13.426782 | 15.470076 | 17.971711 |
| 100.36 | 2.992350 | 4.861876 | 6.029826 | 8.507338 | 10.757144 | 13.482300 | 15.489323 | 17.926730 |
| 100.46 | 2.983734 | 4.860278 | 6.016243 | 8.570401 | 10.718185 | 13.416121 | 15.551369 | 17.875447 |
| 100.56 | 2.997466 | 4.869500 | 6.000975 | 8.535655 | 10.758847 | 13.433879 | 15.519663 | 17.867719 |
| 100.66 | 3.005162 | 4.854816 | 6.000518 | 8.524490 | 10.735983 | 13.382213 | 15.517165 | 17.895878 |
| 100.76 | 2.986715 | 4.887287 | 5.983160 | 8.567997 | 10.674634 | 13.405509 | 15.544410 | 17.850925 |
| 100.86 | 2.986482 | 4.884407 | 6.012503 | 8.566256 | 10.759583 | 13.414905 | 15.556891 | 17.869284 |
| 100.96 | 2.998844 | 4.873090 | 6.034400 | 8.515245 | 10.702649 | 13.445107 | 15.456506 | 17.971489 |
| 101.06 | 2.987077 | 4.875903 | 6.030447 | 8.543086 | 10.688842 | 13.411489 | 15.475465 | 17.939924 |
| 101.16 | 2.987872 | 4.888119 | 5.995870 | 8.576357 | 10.753803 | 13.414376 | 15.546339 | 17.937481 |
| 101.26 | 2.998577 | 4.885501 | 6.023598 | 8.549925 | 10.667115 | 13.455704 | 15.503124 | 17.934999 |
| 101.36 | 3.000565 | 4.894015 | 6.002822 | 8.529778 | 10.750033 | 13.482948 | 15.495828 | 17.870438 |
| 101.46 | 2.984398 | 4.872829 | 5.985549 | 8.562064 | 10.720377 | 13.451103 | 15.536325 | 17.951212 |
| 101.56 | 2.999230 | 4.893323 | 5.987243 | 8.568717 | 10.682880 | 13.494650 | 15.583438 | 17.943997 |
| 101.66 | 3.000322 | 4.885274 | 6.030308 | 8.562750 | 10.742084 | 13.394218 | 15.458598 | 17.881473 |
| 101.76 | 3.003402 | 4.868487 | 6.031262 | 8.571117 | 10.685391 | 13.409787 | 15.586505 | 17.855433 |
| 101.86 | 2.991459 | 4.865523 | 6.008898 | 8.515939 | 10.702259 | 13.470663 | 15.543011 | 17.888239 |
| 101.96 | 3.002713 | 4.889211 | 5.992564 | 8.529678 | 10.759205 | 13.433622 | 15.488360 | 17.962155 |
| 102.06 | 2.998986 | 4.864698 | 6.004269 | 8.524386 | 10.706197 | 13.495219 | 15.517070 | 17.948301 |
| 102.16 | 2.989085 | 4.874193 | 6.026263 | 8.577514 | 10.704208 | 13.494701 | 15.497813 | 17.891833 |
| 102.26 | 3.004368 | 4.890346 | 6.031963 | 8.539026 | 10.693053 | 13.461039 | 15.537020 | 17.964322 |
| 102.36 | 3.005743 | 4.888608 | 6.011433 | 8.543021 | 10.688309 | 13.414779 | 15.576748 | 17.871175 |
| 102.46 | 3.001483 | 4.887927 | 6.014888 | 8.512188 | 10.721922 | 13.486857 | 15.579334 | 17.959432 |
| 102.56 | 3.002322 | 4.856753 | 6.024924 | 8.544232 | 10.676655 | 13.384193 | 15.557028 | 17.921786 |
| 102.66 | 3.006177 | 4.880440 | 5.990193 | 8.564109 | 10.738603 | 13.428006 | 15.463529 | 17.850285 |
| 102.76 | 3.003104 | 4.865840 | 6.022665 | 8.553806 | 10.717702 | 13.418963 | 15.455504 | 17.929832 |
| 102.86 | 3.005005 | 4.881537 | 6.006579 | 8.512955 | 10.674678 | 13.475624 | 15.479320 | 17.892937 |
| 102.96 | 3.000574 | 4.870472 | 5.996613 | 8.569360 | 10.696591 | 13.428835 | 15.547257 | 17.829106 |
| 103.06 | 2.991772 | 4.889258 | 6.001425 | 8.579135 | 10.720541 | 13.431195 | 15.528158 | 17.874644 |
| 103.16 | 2.999228 | 4.859659 | 6.004993 | 8.518568 | 10.746166 | 13.390935 | 15.458602 | 17.821834 |
| 103.26 | 3.000006 | 4.885992 | 6.024342 | 8.505904 | 10.706881 | 13.469568 | 15.516226 | 17.942427 |
| 103.36 | 3.001585 | 4.890711 | 5.990316 | 8.547920 | 10.737279 | 13.377946 | 15.496274 | 17.882980 |
| 103.46 | 3.000939 | 4.872532 | 6.034731 | 8.570182 | 10.738302 | 13.413471 | 15.565795 | 17.941550 |
| 103.56 | 2.994430 | 4.884271 | 6.006920 | 8.532157 | 10.710874 | 13.431097 | 15.549949 | 17.940500 |
| 103.66 | 2.997660 | 4.869066 | 5.988458 | 8.519947 | 10.666832 | 13.484789 | 15.526839 | 17.888971 |
| 103.76 | 2.994879 | 4.890456 | 6.019408 | 8.538351 | 10.698954 | 13.451197 | 15.505077 | 17.947868 |
| 103.86 | 3.000258 | 4.883372 | 5.994086 | 8.539745 | 10.759328 | 13.485227 | 15.563076 | 17.912969 |
| 103.96 | 3.001003 | 4.862973 | 6.022868 | 8.540578 | 10.753091 | 13.387223 | 15.530720 | 17.900773 |
| 104.06 | 3.003251 | 4.892293 | 6.016447 | 8.547188 | 10.745332 | 13.401401 | 15.563417 | 17.904784 |
| 104.16 | 2.992978 | 4.862384 | 6.026679 | 8.521611 | 10.681060 | 13.450469 | 15.452089 | 17.868979 |
| 104.26 | 2.986678 | 4.865309 | 6.002410 | 8.527555 | 10.679032 | 13.489391 | 15.513819 | 17.925601 |
| 104.36 | 3.008508 | 4.896610 | 6.028214 | 8.514879 | 10.741179 | 13.496501 | 15.504462 | 17.842615 |
| 104.46 | 2.983855 | 4.886485 | 6.025455 | 8.538814 | 10.700635 | 13.411621 | 15.540650 | 17.854114 |
| 104.56 | 2.988843 | 4.874375 | 6.005668 | 8.514375 | 10.740112 | 13.404591 | 15.527901 | 17.852354 |
| 104.66 | 2.985870 | 4.892700 | 5.989672 | 8.555796 | 10.675500 | 13.457972 | 15.488592 | 17.917917 |
| 104.76 | 2.998733 | 4.891255 | 5.984643 | 8.526354 | 10.717293 | 13.390529 | 15.531606 | 17.830513 |
| 104.86 | 3.000354 | 4.895005 | 6.026015 | 8.531689 | 10.740781 | 13.450850 | 15.497864 | 17.914435 |
| 104.96 | 2.992217 | 4.880856 | 6.010439 | 8.552939 | 10.674571 | 13.492553 | 15.557291 | 17.965974 |
| 105.06 | 2.994576 | 4.883924 | 6.018221 | 8.516282 | 10.699942 | 13.477847 | 15.466953 | 17.911755 |
| 105.16 | 3.005230 | 4.862937 | 5.997940 | 8.550724 | 10.707686 | 13.406136 | 15.581419 | 17.956290 |
| 105.26 | 2.992126 | 4.893517 | 5.994669 | 8.546067 | 10.743027 | 13.420521 | 15.518968 | 17.918277 |
| 105.36 | 2.991619 | 4.892567 | 6.026066 | 8.515720 | 10.702492 | 13.408998 | 15.582050 | 17.919603 |
| 105.46 | 2.987474 | 4.874814 | 5.999199 | 8.571923 | 10.707241 | 13.433912 | 15.485615 | 17.872909 |
| 105.56 | 3.007843 | 4.864880 | 5.987782 | 8.510455 | 10.714582 | 13.427554 | 15.530294 | 17.826882 |
| 105.66 | 2.986089 | 4.878698 | 6.022999 | 8.564514 | 10.748955 | 13.428248 | 15.472527 | 17.835604 |
| 105.76 | 2.988888 | 4.874243 | 5.994674 | 8.580424 | 10.674185 | 13.448106 | 15.564880 | 17.915433 |
| 105.86 | 3.008370 | 4.896528 | 5.993732 | 8.551294 | 10.687473 | 13.485749 | 15.517221 | 17.887576 |
| 105.96 | 2.986927 | 4.861400 | 5.986836 | 8.569632 | 10.695461 | 13.410311 | 15.581849 | 17.837769 |
| 106.06 | 2.997485 | 4.886638 | 5.989490 | 8.561822 | 10.738350 | 13.431462 | 15.468377 | 17.893651 |
| 106.16 | 3.005809 | 4.895166 | 5.983953 | 8.515438 | 10.707381 | 13.385968 | 15.488160 | 17.851706 |
| 106.26 | 3.002509 | 4.897816 | 5.985530 | 8.529888 | 10.693229 | 13.388103 | 15.507524 | 17.858771 |
| 106.36 | 2.986237 | 4.877365 | 6.027132 | 8.564541 | 10.720095 | 13.438271 | 15.518732 | 17.952548 |
| 106.46 | 2.998909 | 4.856503 | 5.994366 | 8.573266 | 10.752362 | 13.384798 | 15.536485 | 17.871947 |
| 106.56 | 2.988036 | 4.882250 | 6.000927 | 8.519925 | 10.737926 | 13.448447 | 15.465607 | 17.921619 |
| 106.66 | 2.991636 | 4.875994 | 5.992773 | 8.513212 | 10.690153 | 13.498150 | 15.479737 | 17.879663 |
| 106.76 | 2.992300 | 4.881746 | 5.985155 | 8.567685 | 10.734154 | 13.440661 | 15.452295 | 17.875886 |
| 106.86 | 3.002038 | 4.858123 | 6.033561 | 8.541960 | 10.670992 | 13.466832 | 15.561251 | 17.974211 |
| 106.96 | 3.009185 | 4.876243 | 5.994800 | 8.569851 | 10.758476 | 13.411858 | 15.482223 | 17.956358 |
| 107.06 | 2.996601 | 4.867914 | 6.013736 | 8.540921 | 10.701626 | 13.408743 | 15.478641 | 17.849942 |
| 107.16 | 2.985881 | 4.862705 | 5.983390 | 8.556173 | 10.749855 | 13.457556 | 15.451771 | 17.884397 |
| 107.26 | 2.985905 | 4.864365 | 6.022332 | 8.517673 | 10.746069 | 13.397577 | 15.473323 | 17.962009 |
| 107.36 | 2.989863 | 4.897831 | 6.011016 | 8.509923 | 10.676282 | 13.389791 | 15.491782 | 17.957838 |
| 107.46 | 3.009367 | 4.884115 | 6.002768 | 8.572941 | 10.689241 | 13.475882 | 15.543609 | 17.835135 |
| 107.56 | 2.989994 | 4.861259 | 6.028832 | 8.553601 | 10.677517 | 13.442712 | 15.548506 | 17.928795 |
| 107.66 | 2.986968 | 4.872955 | 6.024999 | 8.543478 | 10.706843 | 13.405659 | 15.488960 | 17.904858 |
| 107.76 | 2.992965 | 4.886704 | 6.029459 | 8.536327 | 10.724780 | 13.479596 | 15.583461 | 17.900484 |
| 107.86 | 2.996332 | 4.889246 | 6.020256 | 8.566474 | 10.747167 | 13.418307 | 15.481157 | 17.862550 |
| 107.96 | 3.010361 | 4.890743 | 6.008258 | 8.542289 | 10.705430 | 13.443061 | 15.482298 | 17.886466 |
| 108.06 | 2.990718 | 4.895886 | 6.029749 | 8.530687 | 10.719710 | 13.399023 | 15.490595 | 17.895960 |
| 108.16 | 2.987609 | 4.891764 | 6.028901 | 8.537961 | 10.741635 | 13.396023 | 15.510940 | 17.888428 |
| 108.26 | 2.993976 | 4.859746 | 6.009214 | 8.539798 | 10.759541 | 13.387040 | 15.574199 | 17.879035 |
| 108.36 | 2.990704 | 4.877127 | 6.002795 | 8.579698 | 10.750598 | 13.447985 | 15.558952 | 17.922139 |
| 108.46 | 3.008317 | 4.890818 | 5.981496 | 8.567347 | 10.720277 | 13.427022 | 15.557254 | 17.839147 |
| 108.56 | 3.009912 | 4.894151 | 6.010612 | 8.568190 | 10.749152 | 13.426217 | 15.460059 | 17.869603 |
| 108.66 | 3.000344 | 4.883614 | 6.004464 | 8.530720 | 10.716435 | 13.496542 | 15.541710 | 17.938040 |
| 108.76 | 2.985262 | 4.864508 | 6.021677 | 8.557966 | 10.682920 | 13.497924 | 15.525185 | 17.898237 |
| 108.86 | 3.002485 | 4.892395 | 5.990825 | 8.534436 | 10.728642 | 13.394639 | 15.522375 | 17.874855 |
| 108.96 | 2.990449 | 4.862049 | 6.016104 | 8.527793 | 10.734648 | 13.383687 | 15.489245 | 17.937417 |
| 109.06 | 2.987050 | 4.881765 | 6.008256 | 8.537653 | 10.709547 | 13.433289 | 15.483333 | 17.875135 |
| 109.16 | 2.987708 | 4.877344 | 6.026113 | 8.575700 | 10.677075 | 13.447186 | 15.553749 | 17.927768 |
| 109.26 | 3.006388 | 4.883786 | 6.029795 | 8.573301 | 10.689712 | 13.394248 | 15.502871 | 17.828866 |
| 109.36 | 3.004765 | 4.893796 | 5.983363 | 8.541959 | 10.695166 | 13.474432 | 15.500364 | 17.846973 |
| 109.46 | 2.991856 | 4.881456 | 5.999089 | 8.541841 | 10.722001 | 13.453901 | 15.474921 | 17.862772 |
| 109.56 | 2.988900 | 4.889908 | 6.010572 | 8.511664 | 10.744427 | 13.415048 | 15.500155 | 17.852143 |
| 109.66 | 3.008651 | 4.877402 | 6.003858 | 8.565412 | 10.685640 | 13.457794 | 15.547161 | 17.840561 |
| 109.76 | 3.002050 | 4.860595 | 6.018851 | 8.559704 | 10.694068 | 13.464095 | 15.570975 | 17.965901 |
| 109.86 | 3.002816 | 4.871148 | 5.997975 | 8.542763 | 10.710306 | 13.429122 | 15.556419 | 17.842203 |
| 109.96 | 2.985576 | 4.888711 | 6.019016 | 8.578562 | 10.676998 | 13.488765 | 15.530058 | 17.860823 |
| 110.06 | 3.001372 | 4.893652 | 5.993315 | 8.520252 | 10.749462 | 13.467355 | 15.548830 | 17.861543 |
| 110.16 | 2.985324 | 4.857321 | 6.000098 | 8.577057 | 10.689794 | 13.432105 | 15.552571 | 17.907713 |
| 110.26 | 3.004131 | 4.876477 | 5.986201 | 8.574711 | 10.731292 | 13.468127 | 15.586318 | 17.959747 |
| 110.36 | 2.995080 | 4.898086 | 6.013657 | 8.514959 | 10.699229 | 13.396846 | 15.517874 | 17.864915 |
| 110.46 | 2.988077 | 4.888242 | 6.013534 | 8.531311 | 10.737383 | 13.411931 | 15.487046 | 17.975633 |
| 110.56 | 3.005865 | 4.857491 | 6.003654 | 8.520985 | 10.734643 | 13.408978 | 15.557909 | 17.838387 |
| 110.66 | 2.996539 | 4.864445 | 6.004676 | 8.557000 | 10.741523 | 13.452590 | 15.550567 | 17.900209 |
| 110.76 | 2.989982 | 4.894788 | 5.996240 | 8.560574 | 10.684684 | 13.467737 | 15.565092 | 17.854885 |
| 110.86 | 3.002496 | 4.857034 | 5.997218 | 8.553436 | 10.758254 | 13.470442 | 15.461787 | 17.939732 |
| 110.96 | 2.998550 | 4.877404 | 6.028511 | 8.548769 | 10.737156 | 13.408461 | 15.575802 | 17.897069 |
| 111.06 | 2.988430 | 4.888438 | 5.995407 | 8.548152 | 10.746261 | 13.447967 | 15.471029 | 17.848145 |
| 111.16 | 2.987359 | 4.863924 | 6.011073 | 8.530653 | 10.692347 | 13.458429 | 15.521618 | 17.838435 |
| 111.26 | 2.995999 | 4.892394 | 6.004791 | 8.559339 | 10.730246 | 13.397334 | 15.543708 | 17.889849 |
| 111.36 | 2.985576 | 4.875652 | 6.010530 | 8.526620 | 10.735343 | 13.410705 | 15.545715 | 17.822631 |
| 111.46 | 3.001644 | 4.861645 | 5.981703 | 8.566701 | 10.713250 | 13.442231 | 15.511709 | 17.927478 |
| 111.56 | 2.984629 | 4.863000 | 6.005754 | 8.574187 | 10.729561 | 13.447915 | 15.520533 | 17.918122 |
| 111.66 | 2.986150 | 4.894478 | 5.997615 | 8.527381 | 10.673319 | 13.430295 | 15.484546 | 17.848290 |
| 111.76 | 2.989830 | 4.879425 | 6.005892 | 8.513447 | 10.726448 | 13.433077 | 15.579257 | 17.917918 |
| 111.86 | 2.993151 | 4.873187 | 5.989655 | 8.552546 | 10.744910 | 13.426091 | 15.585141 | 17.961845 |
| 111.96 | 2.996208 | 4.864362 | 6.010801 | 8.520859 | 10.732795 | 13.461753 | 15.533023 | 17.932559 |
| 112.06 | 2.999170 | 4.885188 | 6.026455 | 8.563286 | 10.717691 | 13.400233 | 15.543805 | 17.962446 |
| 112.16 | 2.989195 | 4.890585 | 6.029055 | 8.516804 | 10.714876 | 13.488390 | 15.481884 | 17.823510 |
| 112.26 | 2.999178 | 4.897435 | 5.989058 | 8.527793 | 10.723440 | 13.404753 | 15.454375 | 17.856825 |
| 112.36 | 2.990279 | 4.866879 | 6.005506 | 8.514053 | 10.688469 | 13.384362 | 15.540265 | 17.828827 |
| 112.46 | 3.007084 | 4.897721 | 5.997399 | 8.529521 | 10.698317 | 13.443669 | 15.534249 | 17.834707 |
| 112.56 | 3.000177 | 4.870698 | 6.001516 | 8.542609 | 10.707877 | 13.428002 | 15.567013 | 17.893299 |
| 112.66 | 2.986117 | 4.868482 | 6.003537 | 8.568998 | 10.728688 | 13.384674 | 15.513264 | 17.920141 |
| 112.76 | 3.001451 | 4.897788 | 6.031052 | 8.514177 | 10.701323 | 13.433501 | 15.516951 | 17.857880 |
| 112.86 | 2.999689 | 4.885064 | 5.991026 | 8.516586 | 10.762262 | 13.452903 | 15.548403 | 17.889784 |
| 112.96 | 2.987436 | 4.871420 | 5.998746 | 8.566912 | 10.694042 | 13.479185 | 15.484446 | 17.971293 |
| 113.06 | 2.996473 | 4.867817 | 6.027954 | 8.512682 | 10.703431 | 13.455316 | 15.490325 | 17.947840 |
| 113.16 | 2.989865 | 4.879141 | 5.988590 | 8.511088 | 10.698886 | 13.396898 | 15.517770 | 17.878506 |
| 113.26 | 2.999074 | 4.874017 | 6.006967 | 8.548486 | 10.710833 | 13.419972 | 15.465107 | 17.926202 |
| 113.36 | 2.996505 | 4.862610 | 6.018280 | 8.575389 | 10.751959 | 13.463456 | 15.566644 | 17.878857 |
| 113.46 | 3.004521 | 4.864114 | 5.995751 | 8.570573 | 10.739927 | 13.454858 | 15.457843 | 17.970114 |
| 113.56 | 2.991323 | 4.875094 | 5.996899 | 8.546066 | 10.746314 | 13.457048 | 15.561423 | 17.881052 |
| 113.66 | 2.985985 | 4.865500 | 5.993613 | 8.514049 | 10.747009 | 13.427793 | 15.547710 | 17.932145 |
| 113.76 | 3.002352 | 4.880592 | 5.987838 | 8.553577 | 10.750476 | 13.395525 | 15.475967 | 17.861016 |
| 113.86 | 3.001615 | 4.891100 | 5.996952 | 8.577007 | 10.720959 | 13.437322 | 15.537284 | 17.955841 |
| 113.96 | 2.989216 | 4.872855 | 6.001403 | 8.525817 | 10.735330 | 13.493592 | 15.545997 | 17.823107 |
| 114.06 | 2.992280 | 4.880676 | 6.021650 | 8.549737 | 10.763839 | 13.392976 | 15.563415 | 17.865641 |
| 114.16 | 3.003649 | 4.890422 | 5.985504 | 8.538138 | 10.693973 | 13.482060 | 15.478029 | 17.961296 |
| 114.26 | 2.993476 | 4.891141 | 6.032949 | 8.535620 | 10.714129 | 13.473222 | 15.557693 | 17.854650 |
| 114.36 | 2.995282 | 4.873975 | 6.000988 | 8.534769 | 10.737004 | 13.451260 | 15.534238 | 17.865898 |
| 114.46 | 3.005337 | 4.876011 | 5.985400 | 8.523429 | 10.730670 | 13.453843 | 15.562617 | 17.937219 |
| 114.56 | 2.997690 | 4.870895 | 6.029528 | 8.516594 | 10.701842 | 13.497486 | 15.580111 | 17.821014 |
| 114.66 | 2.984539 | 4.878190 | 6.003704 | 8.564612 | 10.750158 | 13.484705 | 15.564727 | 17.824689 |
| 114.76 | 2.992377 | 4.871852 | 5.991881 | 8.512733 | 10.713697 | 13.481121 | 15.455259 | 17.819008 |
| 114.86 | 3.008984 | 4.889284 | 5.987423 | 8.514912 | 10.679474 | 13.455885 | 15.500270 | 17.937671 |
| 114.96 | 2.986358 | 4.876489 | 5.995724 | 8.556293 | 10.705527 | 13.440779 | 15.497057 | 17.938277 |
| 115.06 | 2.999761 | 4.886880 | 6.013903 | 8.580248 | 10.689969 | 13.466770 | 15.472648 | 17.862103 |
| 115.16 | 3.009706 | 4.885654 | 5.988184 | 8.572383 | 10.675191 | 13.471345 | 15.551030 | 17.967521 |
| 115.26 | 2.985146 | 4.885102 | 6.010122 | 8.542771 | 10.701846 | 13.485994 | 15.569167 | 17.821065 |
| 115.36 | 2.988201 | 4.870215 | 6.006378 | 8.576979 | 10.735180 | 13.434080 | 15.540013 | 17.872447 |
| 115.46 | 2.994663 | 4.877521 | 5.990529 | 8.539568 | 10.763867 | 13.433117 | 15.536295 | 17.908927 |
| 115.56 | 2.994961 | 4.898434 | 6.023622 | 8.515478 | 10.763104 | 13.496719 | 15.533392 | 17.978322 |
| 115.66 | 2.994435 | 4.871968 | 5.999735 | 8.576915 | 10.731048 | 13.389146 | 15.539584 | 17.834898 |
| 115.76 | 3.009222 | 4.883984 | 5.997853 | 8.557714 | 10.709174 | 13.396771 | 15.493241 | 17.940266 |
| 115.86 | 3.001080 | 4.898053 | 6.034783 | 8.554089 | 10.725610 | 13.405696 | 15.499633 | 17.946306 |
| 115.96 | 2.993761 | 4.892736 | 5.988725 | 8.569630 | 10.727830 | 13.455207 | 15.460280 | 17.856342 |
| 116.06 | 2.998936 | 4.864225 | 6.026947 | 8.572886 | 10.761423 | 13.432521 | 15.551592 | 17.946312 |
| 116.16 | 3.009230 | 4.879113 | 6.001130 | 8.526771 | 10.682831 | 13.419862 | 15.483242 | 17.914396 |
| 116.26 | 3.004795 | 4.874529 | 6.026598 | 8.513976 | 10.760412 | 13.414779 | 15.467863 | 17.843152 |
| 116.36 | 2.991244 | 4.863628 | 6.035312 | 8.573261 | 10.670277 | 13.434386 | 15.472830 | 17.823470 |
| 116.46 | 2.997566 | 4.859464 | 6.012884 | 8.507642 | 10.736948 | 13.457463 | 15.477667 | 17.960976 |
| 116.56 | 3.002656 | 4.884632 | 5.986958 | 8.580237 | 10.670465 | 13.456217 | 15.538211 | 17.964868 |
| 116.66 | 2.988547 | 4.858775 | 6.004371 | 8.550576 | 10.692491 | 13.405102 | 15.518622 | 17.948360 |
| 116.76 | 3.000444 | 4.862201 | 6.019737 | 8.534186 | 10.674409 | 13.478437 | 15.568711 | 17.866754 |
| 116.86 | 2.989255 | 4.864516 | 5.989057 | 8.535203 | 10.711307 | 13.404222 | 15.511211 | 17.966808 |
| 116.96 | 2.995502 | 4.889603 | 6.005452 | 8.530508 | 10.753975 | 13.475945 | 15.529035 | 17.873817 |
| 117.06 | 2.988700 | 4.872819 | 5.987972 | 8.552989 | 10.690405 | 13.487496 | 15.590480 | 17.875766 |
| 117.16 | 3.003099 | 4.879043 | 6.009030 | 8.507846 | 10.716180 | 13.381475 | 15.573037 | 17.912980 |
| 117.26 | 2.994047 | 4.879349 | 5.986302 | 8.576864 | 10.749048 | 13.441470 | 15.515911 | 17.949911 |
| 117.36 | 3.010190 | 4.860574 | 5.997478 | 8.528592 | 10.753011 | 13.455273 | 15.587018 | 17.887456 |
| 117.46 | 2.995674 | 4.885048 | 6.007531 | 8.534275 | 10.685704 | 13.466962 | 15.563778 | 17.905151 |
| 117.56 | 3.005292 | 4.861367 | 5.997309 | 8.515638 | 10.733840 | 13.447570 | 15.585173 | 17.929903 |
| 117.66 | 2.991574 | 4.856749 | 6.030233 | 8.558758 | 10.744032 | 13.443390 | 15.534111 | 17.967601 |
| 117.76 | 3.006796 | 4.898219 | 5.994990 | 8.532506 | 10.691427 | 13.390372 | 15.503479 | 17.929149 |
| 117.86 | 3.004556 | 4.897235 | 6.019297 | 8.511542 | 10.717587 | 13.434049 | 15.477473 | 17.832692 |
| 117.96 | 2.997135 | 4.886236 | 6.027637 | 8.518553 | 10.671525 | 13.443839 | 15.580471 | 17.844637 |
| 118.06 | 2.996700 | 4.881760 | 5.989541 | 8.533955 | 10.706545 | 13.408075 | 15.501963 | 17.823107 |
| 118.16 | 2.984554 | 4.884882 | 6.002034 | 8.516055 | 10.688542 | 13.408012 | 15.500331 | 17.910188 |
| 118.26 | 2.998913 | 4.895093 | 6.033664 | 8.514324 | 10.701200 | 13.423669 | 15.493851 | 17.864531 |
| 118.36 | 3.003447 | 4.897278 | 6.030416 | 8.526127 | 10.746787 | 13.442656 | 15.590196 | 17.910917 |
| 118.46 | 3.005919 | 4.873475 | 5.994148 | 8.581856 | 10.707893 | 13.484232 | 15.521321 | 17.895017 |
| 118.56 | 2.999910 | 4.866137 | 5.999264 | 8.513215 | 10.753270 | 13.492212 | 15.514098 | 17.934875 |
| 118.66 | 2.994696 | 4.891995 | 5.988009 | 8.522689 | 10.716258 | 13.448895 | 15.520689 | 17.828416 |
| 118.76 | 2.998493 | 4.898235 | 6.028942 | 8.577931 | 10.738033 | 13.470322 | 15.549389 | 17.839413 |
| 118.86 | 3.010331 | 4.857416 | 6.029818 | 8.524365 | 10.761952 | 13.403819 | 15.591110 | 17.897932 |
| 118.96 | 2.995350 | 4.858202 | 6.009436 | 8.507764 | 10.702384 | 13.481610 | 15.477031 | 17.923888 |
| 119.06 | 3.005678 | 4.863095 | 6.027026 | 8.573668 | 10.695488 | 13.438233 | 15.472580 | 17.954194 |
| 119.16 | 2.989359 | 4.856470 | 6.013919 | 8.571279 | 10.705953 | 13.409225 | 15.478867 | 17.871154 |
| 119.26 | 2.987783 | 4.887045 | 5.984556 | 8.549854 | 10.731102 | 13.472626 | 15.491871 | 17.904264 |
| 119.36 | 3.003696 | 4.891532 | 6.016047 | 8.513503 | 10.672788 | 13.384991 | 15.588541 | 17.820288 |
| 119.46 | 3.005908 | 4.871802 | 6.001685 | 8.571595 | 10.762295 | 13.406011 | 15.563614 | 17.906507 |
| 119.56 | 3.002212 | 4.862945 | 6.008159 | 8.550377 | 10.699744 | 13.433569 | 15.489153 | 17.828625 |
| 119.66 | 2.995778 | 4.898939 | 6.019603 | 8.539793 | 10.711747 | 13.381465 | 15.578565 | 17.891034 |
| 119.76 | 3.002769 | 4.868176 | 6.034086 | 8.580156 | 10.754207 | 13.477970 | 15.470588 | 17.863644 |
| 119.86 | 2.987616 | 4.858615 | 5.991746 | 8.514410 | 10.748312 | 13.438900 | 15.567183 | 17.941500 |
| 119.96 | 3.002364 | 4.871998 | 6.031102 | 8.569824 | 10.684239 | 13.413761 | 15.509386 | 17.946190 |
| 120.06 | 3.005013 | 4.870166 | 5.990339 | 8.558324 | 10.728375 | 13.427146 | 15.529057 | 17.924849 |
| 120.16 | 3.002396 | 4.887635 | 6.013157 | 8.572321 | 10.739218 | 13.404255 | 15.508341 | 17.868112 |
| 120.26 | 2.990793 | 4.897735 | 6.018785 | 8.552482 | 10.675973 | 13.387621 | 15.467970 | 17.837023 |
| 120.36 | 2.993371 | 4.867128 | 5.993364 | 8.538278 | 10.683312 | 13.425711 | 15.533317 | 17.888940 |
| 120.46 | 2.998115 | 4.856981 | 6.003300 | 8.560846 | 10.731544 | 13.440374 | 15.491032 | 17.866463 |
| 120.56 | 2.988816 | 4.875576 | 6.021712 | 8.566782 | 10.724339 | 13.471481 | 15.464138 | 17.847417 |
| 120.66 | 3.000660 | 4.871345 | 5.990709 | 8.547353 | 10.703929 | 13.446679 | 15.545216 | 17.970315 |
| 120.76 | 2.991042 | 4.880417 | 6.015994 | 8.519189 | 10.738518 | 13.397896 | 15.500703 | 17.831552 |
| 120.86 | 3.009574 | 4.871169 | 6.026589 | 8.557520 | 10.747827 | 13.471536 | 15.464650 | 17.905853 |
| 120.96 | 2.998764 | 4.889345 | 6.006817 | 8.548814 | 10.735326 | 13.474065 | 15.468579 | 17.849529 |
| 121.06 | 2.996901 | 4.887250 | 6.034543 | 8.512395 | 10.675927 | 13.489314 | 15.592269 | 17.890244 |
| 121.16 | 3.005768 | 4.887841 | 6.034465 | 8.522151 | 10.758773 | 13.430466 | 15.460860 | 17.872399 |
| 121.26 | 2.989461 | 4.875827 | 5.990581 | 8.523081 | 10.683918 | 13.448281 | 15.508407 | 17.916549 |
| 121.36 | 3.002171 | 4.861264 | 6.028417 | 8.561335 | 10.726978 | 13.473309 | 15.574430 | 17.964655 |
| 121.46 | 2.992689 | 4.892794 | 6.021365 | 8.567933 | 10.717746 | 13.442424 | 15.562701 | 17.977056 |
| 121.56 | 2.986855 | 4.859878 | 6.014912 | 8.573027 | 10.709569 | 13.433554 | 15.510116 | 17.940981 |
| 121.66 | 2.999108 | 4.864101 | 5.989825 | 8.528329 | 10.731156 | 13.431274 | 15.554458 | 17.887300 |
| 121.76 | 3.003801 | 4.898785 | 5.988512 | 8.559137 | 10.689065 | 13.481758 | 15.591139 | 17.874611 |
| 121.86 | 3.005908 | 4.897462 | 5.995959 | 8.556001 | 10.710282 | 13.419514 | 15.538136 | 17.865216 |
| 121.96 | 3.006180 | 4.886904 | 6.029416 | 8.513555 | 10.711825 | 13.398100 | 15.498115 | 17.848747 |
| 122.06 | 3.005067 | 4.877553 | 6.006796 | 8.569982 | 10.675138 | 13.391413 | 15.554024 | 17.866125 |
| 122.16 | 2.999448 | 4.890362 | 5.991192 | 8.553236 | 10.732908 | 13.492430 | 15.525581 | 17.914148 |
| 122.26 | 2.998317 | 4.892206 | 6.031013 | 8.571029 | 10.733019 | 13.500871 | 15.579830 | 17.901151 |
| 122.36 | 2.997261 | 4.895959 | 6.008437 | 8.550637 | 10.737346 | 13.382825 | 15.553274 | 17.858011 |
| 122.46 | 3.001436 | 4.859881 | 6.004529 | 8.517410 | 10.673107 | 13.394090 | 15.575973 | 17.839187 |
| 122.56 | 3.004037 | 4.896865 | 6.029370 | 8.528023 | 10.702599 | 13.435209 | 15.472909 | 17.962665 |
| 122.66 | 3.008901 | 4.879140 | 5.999785 | 8.562201 | 10.751140 | 13.452825 | 15.528778 | 17.824852 |
| 122.76 | 2.999282 | 4.897650 | 6.007726 | 8.544744 | 10.753516 | 13.404067 | 15.493851 | 17.918150 |
| 122.86 | 3.005782 | 4.887260 | 5.984644 | 8.543402 | 10.736218 | 13.441552 | 15.487756 | 17.957123 |
| 122.96 | 3.003258 | 4.859324 | 5.995051 | 8.558386 | 10.759491 | 13.460756 | 15.491633 | 17.946745 |
| 123.06 | 2.984790 | 4.897994 | 5.999252 | 8.565257 | 10.746343 | 13.463462 | 15.525941 | 17.957406 |
| 123.16 | 3.003790 | 4.872087 | 6.012771 | 8.510003 | 10.707171 | 13.457858 | 15.586767 | 17.879074 |
| 123.26 | 2.987497 | 4.865801 | 5.997736 | 8.520442 | 10.695785 | 13.499852 | 15.593060 | 17.944620 |
| 123.36 | 3.000858 | 4.895372 | 5.999027 | 8.559462 | 10.679016 | 13.468795 | 15.555896 | 17.964918 |
| 123.46 | 2.996419 | 4.855910 | 6.017510 | 8.535671 | 10.756411 | 13.444844 | 15.554165 | 17.912459 |
| 123.56 | 3.008158 | 4.893675 | 6.029716 | 8.531685 | 10.719819 | 13.434774 | 15.589848 | 17.902583 |
| 123.66 | 2.984765 | 4.880175 | 6.015475 | 8.553983 | 10.739148 | 13.394101 | 15.495736 | 17.954353 |
| 123.76 | 2.998569 | 4.863106 | 6.034950 | 8.579923 | 10.691618 | 13.412879 | 15.506836 | 17.932569 |
| 123.86 | 2.995829 | 4.890085 | 5.990070 | 8.511237 | 10.687805 | 13.414735 | 15.557473 | 17.824857 |
| 123.96 | 3.004126 | 4.864276 | 5.997033 | 8.581660 | 10.688097 | 13.458053 | 15.583176 | 17.842430 |
| 124.06 | 2.999421 | 4.871946 | 6.024247 | 8.557697 | 10.722460 | 13.461938 | 15.492828 | 17.897867 |
| 124.16 | 2.987317 | 4.897870 | 6.007681 | 8.527609 | 10.726677 | 13.403703 | 15.581997 | 17.973968 |
| 124.26 | 3.008834 | 4.873757 | 6.035251 | 8.543448 | 10.751048 | 13.402853 | 15.514189 | 17.950509 |
| 124.36 | 2.998069 | 4.872843 | 6.035008 | 8.532828 | 10.746928 | 13.454076 | 15.506550 | 17.891090 |
| 124.46 | 3.001335 | 4.867774 | 6.019965 | 8.554431 | 10.690840 | 13.425622 | 15.491365 | 17.900303 |
| 124.56 | 3.003759 | 4.865624 | 5.999289 | 8.576321 | 10.732774 | 13.436372 | 15.586874 | 17.956358 |
| 124.66 | 2.996690 | 4.880926 | 6.031523 | 8.577745 | 10.682052 | 13.442726 | 15.471579 | 17.926189 |
| 124.76 | 2.986613 | 4.860319 | 5.985610 | 8.565464 | 10.680206 | 13.431549 | 15.573429 | 17.865108 |
| 124.86 | 2.994696 | 4.888528 | 6.005215 | 8.514001 | 10.673081 | 13.455113 | 15.500298 | 17.881355 |
| 124.96 | 2.990320 | 4.879004 | 6.001160 | 8.509566 | 10.738440 | 13.385542 | 15.554156 | 17.824408 |
| 125.06 | 3.006718 | 4.859428 | 6.026510 | 8.522695 | 10.741978 | 13.385202 | 15.521402 | 17.870111 |
| 125.16 | 2.988397 | 4.869403 | 6.005587 | 8.560101 | 10.715437 | 13.437180 | 15.583011 | 17.860569 |
| 125.26 | 2.986438 | 4.880316 | 6.006653 | 8.549602 | 10.685911 | 13.417948 | 15.588498 | 17.860578 |
| 125.36 | 3.001902 | 4.891990 | 5.988660 | 8.511321 | 10.688586 | 13.499945 | 15.499182 | 17.827286 |
| 125.46 | 2.993244 | 4.874115 | 6.023838 | 8.543064 | 10.683390 | 13.424348 | 15.569808 | 17.891026 |
| 125.56 | 3.010058 | 4.887954 | 5.982862 | 8.532079 | 10.741980 | 13.428639 | 15.587353 | 17.840593 |
| 125.66 | 2.988591 | 4.888411 | 5.998738 | 8.570340 | 10.708043 | 13.457268 | 15.459725 | 17.979070 |
| 125.76 | 2.984629 | 4.875952 | 6.006655 | 8.561665 | 10.762761 | 13.400888 | 15.489354 | 17.951670 |
| 125.86 | 3.000988 | 4.855893 | 6.030656 | 8.548924 | 10.727317 | 13.474287 | 15.591229 | 17.933017 |
| 125.96 | 2.995545 | 4.870516 | 6.015632 | 8.536942 | 10.724827 | 13.408048 | 15.573534 | 17.926825 |
| 126.06 | 2.985693 | 4.898029 | 6.030887 | 8.568926 | 10.762383 | 13.436908 | 15.587129 | 17.949183 |
| 126.16 | 3.000170 | 4.895170 | 5.987034 | 8.551078 | 10.677901 | 13.405438 | 15.487537 | 17.896212 |
| 126.26 | 2.996229 | 4.891628 | 5.993363 | 8.569064 | 10.751489 | 13.422315 | 15.517983 | 17.854602 |
| 126.36 | 2.986062 | 4.862370 | 6.015307 | 8.507767 | 10.739749 | 13.383935 | 15.566475 | 17.977959 |
| 126.46 | 2.988642 | 4.861456 | 6.032725 | 8.541772 | 10.693912 | 13.396152 | 15.546921 | 17.961702 |
| 126.56 | 3.005660 | 4.889757 | 6.035917 | 8.536636 | 10.682231 | 13.439036 | 15.464020 | 17.978902 |
| 126.66 | 2.995496 | 4.871292 | 5.997945 | 8.556546 | 10.764685 | 13.475136 | 15.573629 | 17.843541 |
| 126.76 | 2.988378 | 4.889272 | 5.994812 | 8.549542 | 10.691395 | 13.460649 | 15.560861 | 17.915914 |
| 126.86 | 3.004797 | 4.859876 | 6.018709 | 8.527931 | 10.696349 | 13.411082 | 15.521436 | 17.960222 |
| 126.96 | 2.985687 | 4.878911 | 5.988559 | 8.551630 | 10.756095 | 13.430571 | 15.548329 | 17.965419 |
| 127.06 | 3.001916 | 4.889614 | 6.015547 | 8.533068 | 10.684300 | 13.420555 | 15.475849 | 17.920570 |
| 127.16 | 2.996128 | 4.859463 | 6.034186 | 8.565773 | 10.692245 | 13.401117 | 15.533318 | 17.915093 |
| 127.26 | 3.004497 | 4.871022 | 6.027620 | 8.516049 | 10.716960 | 13.416644 | 15.562645 | 17.843536 |
| 127.36 | 2.984804 | 4.874556 | 5.995562 | 8.579090 | 10.707558 | 13.456456 | 15.486765 | 17.922228 |
| 127.46 | 2.988385 | 4.890645 | 6.001994 | 8.544704 | 10.741277 | 13.429920 | 15.459037 | 17.889707 |
| 127.56 | 3.003889 | 4.872183 | 5.996830 | 8.579421 | 10.717827 | 13.467244 | 15.514561 | 17.929037 |
| 127.66 | 3.007914 | 4.874335 | 6.007960 | 8.526308 | 10.727666 | 13.411357 | 15.548376 | 17.879413 |
| 127.76 | 2.988738 | 4.877697 | 6.005140 | 8.550941 | 10.707170 | 13.416085 | 15.531814 | 17.957608 |
| 127.86 | 3.002479 | 4.893344 | 6.005449 | 8.519134 | 10.762471 | 13.432253 | 15.557727 | 17.962545 |
| 127.96 | 2.994461 | 4.859296 | 6.014319 | 8.569968 | 10.694820 | 13.473225 | 15.591027 | 17.972933 |
| 128.06 | 3.004976 | 4.865346 | 6.031154 | 8.543727 | 10.707904 | 13.463488 | 15.532755 | 17.899768 |
| 128.16 | 2.996568 | 4.868982 | 5.997417 | 8.579310 | 10.685079 | 13.478332 | 15.499949 | 17.858359 |
| 128.26 | 2.988943 | 4.888517 | 6.006888 | 8.516850 | 10.714588 | 13.489530 | 15.585103 | 17.924088 |
| 128.36 | 2.984910 | 4.874418 | 5.986541 | 8.527742 | 10.680929 | 13.398329 | 15.550514 | 17.945411 |
| 128.46 | 2.990810 | 4.867985 | 5.987508 | 8.538420 | 10.672383 | 13.477987 | 15.557965 | 17.830463 |
| 128.56 | 2.997716 | 4.880224 | 6.009956 | 8.544608 | 10.709055 | 13.446779 | 15.592716 | 17.893643 |
| 128.66 | 2.986799 | 4.894904 | 5.986030 | 8.554367 | 10.689574 | 13.458584 | 15.492196 | 17.844609 |
| 128.76 | 2.988603 | 4.888332 | 6.014495 | 8.515342 | 10.752450 | 13.450446 | 15.468869 | 17.857013 |
| 128.86 | 3.004123 | 4.866603 | 6.036748 | 8.523154 | 10.700870 | 13.395105 | 15.576543 | 17.931459 |
| 128.96 | 2.990845 | 4.886634 | 6.011036 | 8.508044 | 10.677044 | 13.431887 | 15.502415 | 17.932967 |
| 129.06 | 2.991008 | 4.857899 | 6.022763 | 8.568068 | 10.694545 | 13.466434 | 15.498923 | 17.982001 |
| 129.16 | 3.007785 | 4.897725 | 5.998178 | 8.524555 | 10.709392 | 13.448244 | 15.550226 | 17.946980 |
| 129.26 | 2.986790 | 4.871855 | 5.996797 | 8.522600 | 10.697537 | 13.452183 | 15.467589 | 17.842591 |
| 129.36 | 2.989741 | 4.893820 | 6.018638 | 8.507821 | 10.758217 | 13.454976 | 15.489324 | 17.934298 |
| 129.46 | 3.003139 | 4.892105 | 5.991825 | 8.519704 | 10.735286 | 13.433623 | 15.562523 | 17.876929 |
| 129.56 | 2.993300 | 4.860344 | 5.988355 | 8.529884 | 10.758007 | 13.415644 | 15.467579 | 17.950395 |
| 129.66 | 2.986447 | 4.866253 | 6.026868 | 8.558436 | 10.716897 | 13.442791 | 15.544873 | 17.979996 |
| 129.76 | 2.987490 | 4.860916 | 6.012034 | 8.561133 | 10.725909 | 13.407244 | 15.476052 | 17.909986 |
| 129.86 | 2.996265 | 4.874275 | 5.995474 | 8.528362 | 10.711952 | 13.450147 | 15.468992 | 17.851443 |
| 129.96 | 3.010691 | 4.882432 | 6.028530 | 8.580379 | 10.745606 | 13.395078 | 15.549182 | 17.906931 |
| 130.06 | 2.988292 | 4.892624 | 6.001120 | 8.524051 | 10.671342 | 13.437431 | 15.487113 | 17.901395 |
| 130.16 | 3.009151 | 4.873642 | 6.012214 | 8.524711 | 10.670734 | 13.438846 | 15.469178 | 17.878156 |
| 130.26 | 2.986811 | 4.880143 | 5.992517 | 8.529278 | 10.742796 | 13.396753 | 15.461088 | 17.890569 |
| 130.36 | 2.989394 | 4.890114 | 5.991164 | 8.540464 | 10.703193 | 13.416501 | 15.541231 | 17.859062 |
| 130.46 | 2.996871 | 4.898276 | 5.987159 | 8.575313 | 10.741415 | 13.439029 | 15.480413 | 17.846494 |
| 130.56 | 2.996994 | 4.894204 | 6.014415 | 8.566917 | 10.753029 | 13.387665 | 15.507104 | 17.980164 |
| 130.66 | 2.985445 | 4.880420 | 6.005063 | 8.566015 | 10.684929 | 13.453846 | 15.544539 | 17.899821 |
| 130.76 | 2.985037 | 4.893565 | 6.004704 | 8.512499 | 10.676081 | 13.489792 | 15.532378 | 17.854372 |
| 130.86 | 3.000824 | 4.878671 | 6.036155 | 8.557456 | 10.679637 | 13.496227 | 15.566322 | 17.956189 |
| 130.96 | 3.006287 | 4.863412 | 6.036773 | 8.548357 | 10.745209 | 13.483242 | 15.575383 | 17.923426 |
| 131.06 | 2.987325 | 4.884247 | 5.990603 | 8.546844 | 10.749742 | 13.478884 | 15.481423 | 17.977660 |
| 131.16 | 3.000533 | 4.886972 | 5.985693 | 8.528585 | 10.689812 | 13.420545 | 15.457043 | 17.847681 |
| 131.26 | 3.001756 | 4.875563 | 6.007900 | 8.525362 | 10.701067 | 13.402562 | 15.520681 | 17.960643 |
| 131.36 | 2.991066 | 4.860770 | 6.014104 | 8.564117 | 10.736650 | 13.424588 | 15.493805 | 17.937793 |
| 131.46 | 2.999240 | 4.866524 | 5.990428 | 8.536103 | 10.704426 | 13.461316 | 15.566397 | 17.883332 |
| 131.56 | 3.007774 | 4.869016 | 6.026301 | 8.534739 | 10.700853 | 13.502110 | 15.550556 | 17.824712 |
| 131.66 | 3.004441 | 4.881213 | 6.017096 | 8.520699 | 10.697234 | 13.501901 | 15.470010 | 17.936617 |
| 131.76 | 2.997200 | 4.891423 | 5.999719 | 8.534593 | 10.746968 | 13.486469 | 15.541561 | 17.943892 |
| 131.86 | 2.992668 | 4.864670 | 6.018849 | 8.560492 | 10.674414 | 13.406598 | 15.542817 | 17.827434 |
| 131.96 | 3.002970 | 4.868516 | 6.021678 | 8.573619 | 10.703729 | 13.478306 | 15.528897 | 17.927622 |
| 132.06 | 2.994664 | 4.875918 | 6.006048 | 8.565621 | 10.694865 | 13.467986 | 15.526991 | 17.854990 |
| 132.16 | 2.997416 | 4.860735 | 6.032700 | 8.551073 | 10.686217 | 13.439249 | 15.525831 | 17.859324 |
| 132.26 | 2.996533 | 4.893725 | 6.023124 | 8.561409 | 10.747773 | 13.455718 | 15.485369 | 17.895989 |
| 132.36 | 3.007532 | 4.866570 | 6.007371 | 8.563486 | 10.734794 | 13.450778 | 15.552182 | 17.925757 |
| 132.46 | 2.991363 | 4.885462 | 6.023481 | 8.582067 | 10.679270 | 13.472637 | 15.541262 | 17.922469 |
| 132.56 | 2.992702 | 4.870875 | 5.991614 | 8.544398 | 10.718275 | 13.463994 | 15.496647 | 17.932902 |
| 132.66 | 3.009763 | 4.888254 | 5.998371 | 8.527439 | 10.675974 | 13.459638 | 15.463660 | 17.923220 |
| 132.76 | 2.991616 | 4.887006 | 5.997050 | 8.566457 | 10.764577 | 13.424978 | 15.548955 | 17.844297 |
| 132.86 | 2.991635 | 4.890129 | 6.016543 | 8.562398 | 10.703558 | 13.420926 | 15.471125 | 17.972889 |
| 132.96 | 3.000796 | 4.864281 | 6.023353 | 8.570445 | 10.705245 | 13.406149 | 15.567311 | 17.906260 |
| 133.06 | 3.008672 | 4.897765 | 6.024551 | 8.513548 | 10.678731 | 13.407383 | 15.588372 | 17.907414 |
| 133.16 | 2.986033 | 4.888160 | 5.996831 | 8.576327 | 10.766721 | 13.419855 | 15.486750 | 17.830421 |
| 133.26 | 2.984874 | 4.892296 | 6.014488 | 8.518620 | 10.763088 | 13.443191 | 15.488246 | 17.963255 |
| 133.36 | 3.006082 | 4.867751 | 6.019167 | 8.546475 | 10.727065 | 13.453735 | 15.554101 | 17.838408 |
| 133.46 | 2.987499 | 4.885014 | 5.991854 | 8.558655 | 10.698690 | 13.441915 | 15.504646 | 17.951045 |
| 133.56 | 2.998761 | 4.887334 | 5.997835 | 8.559760 | 10.694237 | 13.459602 | 15.572194 | 17.981180 |
| 133.66 | 2.991653 | 4.877276 | 6.011935 | 8.541036 | 10.758030 | 13.383397 | 15.593746 | 17.842790 |
| 133.76 | 2.999282 | 4.884692 | 6.014464 | 8.545877 | 10.713712 | 13.437352 | 15.529272 | 17.946417 |
| 133.86 | 2.984868 | 4.859079 | 6.006573 | 8.526046 | 10.676838 | 13.392181 | 15.550677 | 17.969724 |
| 133.96 | 2.985743 | 4.883276 | 6.007829 | 8.578213 | 10.741362 | 13.490740 | 15.524349 | 17.926107 |
| 134.06 | 3.000108 | 4.891681 | 6.004704 | 8.581452 | 10.761661 | 13.496193 | 15.568946 | 17.832716 |
| 134.16 | 3.002989 | 4.886184 | 6.020677 | 8.552788 | 10.686786 | 13.439209 | 15.506222 | 17.888535 |
| 134.26 | 2.990171 | 4.879289 | 5.993139 | 8.558692 | 10.723960 | 13.415742 | 15.462602 | 17.871683 |
| 134.36 | 3.008788 | 4.878016 | 6.032578 | 8.524613 | 10.747668 | 13.416551 | 15.465150 | 17.924708 |
| 134.46 | 2.998728 | 4.881906 | 5.995161 | 8.509450 | 10.754772 | 13.453599 | 15.487250 | 17.835693 |
| 134.56 | 2.997511 | 4.865995 | 5.986053 | 8.556759 | 10.703452 | 13.392622 | 15.460859 | 17.955123 |
| 134.66 | 2.986206 | 4.870477 | 6.012577 | 8.553446 | 10.764186 | 13.501798 | 15.574868 | 17.826339 |
| 134.76 | 2.985119 | 4.874840 | 6.005582 | 8.571504 | 10.729822 | 13.421617 | 15.579831 | 17.886577 |
| 134.86 | 3.008234 | 4.884333 | 5.986226 | 8.541941 | 10.683703 | 13.390757 | 15.481453 | 17.976229 |
| 134.96 | 3.008300 | 4.871865 | 6.008052 | 8.543954 | 10.739721 | 13.483869 | 15.479197 | 17.906535 |
| 135.06 | 3.001333 | 4.899599 | 6.016718 | 8.561256 | 10.754569 | 13.461967 | 15.481909 | 17.920936 |
| 135.16 | 2.985618 | 4.868541 | 6.028473 | 8.526041 | 10.688369 | 13.467305 | 15.508000 | 17.873939 |
| 135.26 | 3.009645 | 4.872797 | 6.017775 | 8.529245 | 10.676874 | 13.437597 | 15.543644 | 17.874528 |
| 135.36 | 3.004044 | 4.870718 | 5.991636 | 8.544340 | 10.674711 | 13.411725 | 15.469866 | 17.879684 |
| 135.46 | 2.997803 | 4.876167 | 6.001968 | 8.515359 | 10.682756 | 13.465723 | 15.584754 | 17.831006 |
| 135.56 | 2.987639 | 4.894889 | 6.021415 | 8.571268 | 10.752901 | 13.416293 | 15.485545 | 17.871577 |
| 135.66 | 3.011356 | 4.889402 | 6.017559 | 8.511343 | 10.754231 | 13.475361 | 15.483359 | 17.955083 |
| 135.76 | 2.987213 | 4.892319 | 6.018549 | 8.568392 | 10.688435 | 13.450174 | 15.583295 | 17.980613 |
| 135.86 | 3.010669 | 4.892627 | 6.005454 | 8.560825 | 10.728521 | 13.393324 | 15.552205 | 17.961482 |
| 135.96 | 3.000209 | 4.894214 | 5.991034 | 8.521339 | 10.680380 | 13.458106 | 15.463705 | 17.973742 |
| 136.06 | 2.999015 | 4.880777 | 6.009726 | 8.555102 | 10.724151 | 13.436298 | 15.584440 | 17.958489 |
| 136.16 | 2.997219 | 4.887329 | 6.034905 | 8.559915 | 10.695145 | 13.412241 | 15.559979 | 17.942030 |
| 136.26 | 3.008234 | 4.900298 | 5.989893 | 8.569489 | 10.733030 | 13.402676 | 15.524366 | 17.906619 |
| 136.36 | 2.995078 | 4.868481 | 6.029724 | 8.522457 | 10.716373 | 13.438662 | 15.550540 | 17.905485 |
| 136.46 | 3.001632 | 4.877686 | 6.025806 | 8.566372 | 10.686903 | 13.407531 | 15.529518 | 17.947595 |
| 136.56 | 3.011159 | 4.888090 | 6.015972 | 8.553440 | 10.726707 | 13.485758 | 15.596097 | 17.939590 |
| 136.66 | 3.008981 | 4.885207 | 6.017127 | 8.569066 | 10.764174 | 13.416938 | 15.503199 | 17.945869 |
| 136.76 | 2.990364 | 4.872091 | 6.036658 | 8.578714 | 10.762796 | 13.473145 | 15.534481 | 17.851248 |
| 136.86 | 3.000694 | 4.894098 | 6.030954 | 8.570261 | 10.747400 | 13.475426 | 15.572969 | 17.859269 |
| 136.96 | 2.997176 | 4.877517 | 6.029373 | 8.510018 | 10.681995 | 13.495091 | 15.486522 | 17.924622 |
| 137.06 | 3.008313 | 4.861937 | 6.018087 | 8.534801 | 10.681433 | 13.394668 | 15.486502 | 17.946416 |
| 137.16 | 2.990247 | 4.873808 | 6.011342 | 8.533050 | 10.704386 | 13.452479 | 15.547720 | 17.856748 |
| 137.26 | 2.992247 | 4.866724 | 6.022967 | 8.519610 | 10.698450 | 13.407482 | 15.563767 | 17.916847 |
| 137.36 | 3.000823 | 4.859996 | 6.025013 | 8.562769 | 10.766289 | 13.450949 | 15.524860 | 17.857725 |
| 137.46 | 2.997342 | 4.872141 | 6.031576 | 8.572772 | 10.713744 | 13.387199 | 15.518012 | 17.836868 |
| 137.56 | 2.989712 | 4.887326 | 6.008369 | 8.556736 | 10.710775 | 13.407638 | 15.553405 | 17.952629 |
| 137.66 | 2.991254 | 4.900376 | 6.007927 | 8.554671 | 10.745841 | 13.486142 | 15.481730 | 17.947258 |
| 137.76 | 3.004136 | 4.900029 | 6.036373 | 8.553073 | 10.691362 | 13.445628 | 15.521680 | 17.973346 |
| 137.86 | 2.986827 | 4.885445 | 5.988273 | 8.556499 | 10.732511 | 13.406440 | 15.561666 | 17.968918 |
| 137.96 | 2.996623 | 4.875495 | 5.991694 | 8.530996 | 10.766805 | 13.445000 | 15.487664 | 17.961652 |
| 138.06 | 2.991187 | 4.882996 | 5.995709 | 8.534550 | 10.686810 | 13.413215 | 15.483853 | 17.880939 |
| 138.16 | 3.011564 | 4.884008 | 6.017853 | 8.512881 | 10.701157 | 13.426181 | 15.485724 | 17.861819 |
| 138.26 | 3.006766 | 4.899302 | 6.007706 | 8.563159 | 10.720612 | 13.481293 | 15.533109 | 17.899402 |
| 138.36 | 2.986183 | 4.863530 | 6.002056 | 8.525541 | 10.761633 | 13.498948 | 15.519682 | 17.912467 |
| 138.46 | 2.986870 | 4.898851 | 5.999783 | 8.517073 | 10.721677 | 13.405132 | 15.500003 | 17.833772 |
| 138.56 | 2.995542 | 4.857805 | 6.008540 | 8.519791 | 10.697498 | 13.501020 | 15.499163 | 17.895475 |
| 138.66 | 2.995036 | 4.888168 | 6.018874 | 8.522471 | 10.744418 | 13.456514 | 15.555832 | 17.924465 |
| 138.76 | 2.986513 | 4.857900 | 6.018315 | 8.555808 | 10.686277 | 13.494325 | 15.564157 | 17.907830 |
| 138.86 | 3.006195 | 4.867928 | 5.995454 | 8.545022 | 10.686916 | 13.418416 | 15.494185 | 17.864687 |
| 138.96 | 2.992044 | 4.859706 | 6.028265 | 8.572620 | 10.694872 | 13.398384 | 15.519687 | 17.935889 |
| 139.06 | 2.995161 | 4.876513 | 5.995084 | 8.540973 | 10.761786 | 13.414100 | 15.559667 | 17.866654 |
| 139.16 | 2.993883 | 4.895920 | 6.027140 | 8.550756 | 10.691350 | 13.388029 | 15.564136 | 17.951172 |
| 139.26 | 3.006165 | 4.866988 | 6.032317 | 8.584605 | 10.677359 | 13.480979 | 15.504508 | 17.899535 |
| 139.36 | 2.989028 | 4.878741 | 5.984922 | 8.575033 | 10.709024 | 13.450057 | 15.469408 | 17.872107 |
| 139.46 | 2.987049 | 4.893686 | 6.011732 | 8.543546 | 10.727582 | 13.479639 | 15.528583 | 17.943929 |
| 139.56 | 2.985954 | 4.895481 | 6.017893 | 8.582682 | 10.719045 | 13.403343 | 15.507740 | 17.835532 |
| 139.66 | 3.009510 | 4.864867 | 6.023156 | 8.569935 | 10.704207 | 13.415411 | 15.503701 | 17.963112 |
| 139.76 | 2.986710 | 4.886772 | 6.014472 | 8.581700 | 10.736489 | 13.432500 | 15.578894 | 17.867459 |
| 139.86 | 2.997346 | 4.891422 | 6.012614 | 8.553601 | 10.712080 | 13.493380 | 15.543862 | 17.921119 |
| 139.96 | 2.987428 | 4.867481 | 5.988913 | 8.536750 | 10.758480 | 13.422033 | 15.508700 | 17.845356 |
| 140.06 | 3.008904 | 4.879363 | 6.008413 | 8.522381 | 10.745049 | 13.495880 | 15.549587 | 17.931355 |
| 140.16 | 2.995694 | 4.858393 | 6.012792 | 8.579095 | 10.693930 | 13.402670 | 15.468799 | 17.935129 |
| 140.26 | 3.004626 | 4.874354 | 5.996819 | 8.535897 | 10.681964 | 13.409998 | 15.463108 | 17.949672 |
| 140.36 | 2.997762 | 4.866158 | 5.996791 | 8.535000 | 10.703111 | 13.494200 | 15.463702 | 17.966789 |
| 140.46 | 2.991693 | 4.871921 | 6.003794 | 8.531432 | 10.716498 | 13.465617 | 15.566877 | 17.877243 |
| 140.56 | 2.990038 | 4.892685 | 6.012296 | 8.584498 | 10.722024 | 13.489969 | 15.551493 | 17.970769 |
| 140.66 | 2.987605 | 4.874996 | 6.030915 | 8.546607 | 10.727257 | 13.488921 | 15.490038 | 17.946493 |
| 140.76 | 2.987340 | 4.895627 | 6.034449 | 8.542581 | 10.718743 | 13.481887 | 15.511126 | 17.832681 |
| 140.86 | 2.988097 | 4.878767 | 6.015064 | 8.546192 | 10.759404 | 13.421184 | 15.590490 | 17.860742 |
| 140.96 | 3.006748 | 4.888690 | 6.024659 | 8.562012 | 10.748200 | 13.395785 | 15.490585 | 17.873869 |
| 141.06 | 2.994112 | 4.899580 | 5.994915 | 8.584985 | 10.760971 | 13.496478 | 15.574872 | 17.973623 |
| 141.16 | 3.000869 | 4.872470 | 6.029719 | 8.522187 | 10.674279 | 13.430689 | 15.551733 | 17.916526 |
| 141.26 | 2.993863 | 4.869331 | 6.010320 | 8.519735 | 10.722412 | 13.441457 | 15.582845 | 17.937801 |
| 141.36 | 3.004082 | 4.874095 | 5.997345 | 8.523196 | 10.711457 | 13.402207 | 15.496758 | 17.984353 |
| 141.46 | 3.009561 | 4.885544 | 6.025701 | 8.530357 | 10.720291 | 13.452110 | 15.480384 | 17.862117 |
| 141.56 | 2.998424 | 4.858996 | 5.986507 | 8.583587 | 10.692101 | 13.473474 | 15.513779 | 17.941208 |
| 141.66 | 3.007691 | 4.899736 | 5.995896 | 8.569846 | 10.675870 | 13.393964 | 15.561794 | 17.873738 |
| 141.76 | 3.011441 | 4.871268 | 6.008233 | 8.528861 | 10.714504 | 13.485537 | 15.573690 | 17.877474 |
| 141.86 | 3.007372 | 4.876732 | 5.984928 | 8.578093 | 10.733116 | 13.411814 | 15.492647 | 17.932996 |
| 141.96 | 2.992659 | 4.896054 | 6.028080 | 8.518622 | 10.757754 | 13.443644 | 15.501517 | 17.969617 |
| 142.06 | 3.009827 | 4.893360 | 6.010594 | 8.571794 | 10.719793 | 13.386782 | 15.559694 | 17.984844 |
| 142.16 | 2.998348 | 4.864209 | 5.999373 | 8.540002 | 10.750735 | 13.406274 | 15.464770 | 17.844313 |
| 142.26 | 2.986529 | 4.884293 | 6.005348 | 8.550816 | 10.753888 | 13.488123 | 15.507739 | 17.871384 |
| 142.36 | 3.009031 | 4.889211 | 5.995088 | 8.539377 | 10.726816 | 13.468524 | 15.483251 | 17.913929 |
| 142.46 | 3.007714 | 4.860417 | 5.987648 | 8.517147 | 10.673452 | 13.398612 | 15.552078 | 17.887248 |
| 142.56 | 3.000218 | 4.863740 | 6.004661 | 8.553097 | 10.713125 | 13.486775 | 15.567948 | 17.867131 |
| 142.66 | 3.005720 | 4.885726 | 6.011253 | 8.529863 | 10.736975 | 13.482788 | 15.593671 | 17.937665 |
| 142.76 | 3.000154 | 4.882437 | 6.025155 | 8.515038 | 10.743267 | 13.400137 | 15.468944 | 17.949454 |
| 142.86 | 2.992689 | 4.873136 | 6.014050 | 8.559665 | 10.743353 | 13.424024 | 15.492656 | 17.871473 |
| 142.96 | 2.998351 | 4.888892 | 5.992243 | 8.535172 | 10.749450 | 13.429118 | 15.473582 | 17.948077 |
| 143.06 | 3.002267 | 4.893120 | 6.025167 | 8.515303 | 10.736496 | 13.480493 | 15.572882 | 17.873460 |
| 143.16 | 2.993598 | 4.887440 | 6.026310 | 8.517483 | 10.685987 | 13.419957 | 15.528628 | 17.972079 |
| 143.26 | 2.992954 | 4.860388 | 6.033118 | 8.585574 | 10.717229 | 13.414515 | 15.492231 | 17.938260 |
| 143.36 | 2.995170 | 4.898104 | 6.006798 | 8.513216 | 10.732357 | 13.500113 | 15.468676 | 17.842512 |
| 143.46 | 2.991696 | 4.864035 | 6.014778 | 8.539413 | 10.715818 | 13.391415 | 15.531759 | 17.835898 |
| 143.56 | 3.005838 | 4.883630 | 6.025960 | 8.575752 | 10.693829 | 13.407746 | 15.529235 | 17.865435 |
| 143.66 | 3.001262 | 4.879417 | 6.012136 | 8.569278 | 10.705022 | 13.447495 | 15.479656 | 17.872590 |
| 143.76 | 2.998135 | 4.875704 | 6.008180 | 8.540338 | 10.723042 | 13.462952 | 15.518461 | 17.850502 |
| 143.86 | 3.008935 | 4.885531 | 6.007159 | 8.564754 | 10.692840 | 13.447237 | 15.589167 | 17.975554 |
| 143.96 | 2.990553 | 4.866350 | 6.029716 | 8.584919 | 10.719902 | 13.491437 | 15.477685 | 17.913002 |
| 144.06 | 2.985557 | 4.876009 | 6.001877 | 8.555734 | 10.736996 | 13.388454 | 15.537067 | 17.841133 |
| 144.16 | 2.999574 | 4.876712 | 5.992300 | 8.533696 | 10.748868 | 13.420514 | 15.524766 | 17.967733 |
| 144.26 | 2.986192 | 4.860009 | 5.989309 | 8.564481 | 10.728710 | 13.439863 | 15.538215 | 17.845624 |
| 144.36 | 2.993069 | 4.886310 | 6.034490 | 8.548822 | 10.737868 | 13.499337 | 15.473072 | 17.827853 |
| 144.46 | 3.001876 | 4.886361 | 6.038264 | 8.578692 | 10.742968 | 13.499029 | 15.580774 | 17.974162 |
| 144.56 | 3.003053 | 4.888303 | 5.985434 | 8.564019 | 10.766600 | 13.388448 | 15.479394 | 17.908368 |
| 144.66 | 2.997361 | 4.859067 | 5.990484 | 8.576536 | 10.708166 | 13.421190 | 15.535739 | 17.902132 |
| 144.76 | 2.987414 | 4.872493 | 6.008874 | 8.519786 | 10.723918 | 13.468171 | 15.587677 | 17.890462 |
| 144.86 | 2.993627 | 4.894583 | 6.016741 | 8.550532 | 10.748119 | 13.459406 | 15.478794 | 17.833959 |
| 144.96 | 2.998027 | 4.895655 | 5.994923 | 8.531284 | 10.737476 | 13.473721 | 15.490125 | 17.950178 |
| 145.06 | 3.003454 | 4.887761 | 6.011665 | 8.527895 | 10.740274 | 13.490237 | 15.553389 | 17.902031 |
| 145.16 | 2.994337 | 4.898365 | 6.020265 | 8.530046 | 10.741786 | 13.471497 | 15.508821 | 17.961040 |
| 145.26 | 3.008649 | 4.892370 | 6.021463 | 8.548921 | 10.680796 | 13.498669 | 15.539816 | 17.948679 |
| 145.36 | 3.000036 | 4.874536 | 6.018957 | 8.582412 | 10.747672 | 13.493130 | 15.570293 | 17.829657 |
| 145.46 | 2.987276 | 4.869344 | 6.037728 | 8.585861 | 10.756547 | 13.425737 | 15.487734 | 17.914594 |
| 145.56 | 3.001196 | 4.861719 | 6.023849 | 8.565415 | 10.714192 | 13.404345 | 15.474006 | 17.963544 |
| 145.66 | 3.006543 | 4.896944 | 6.013125 | 8.564445 | 10.763801 | 13.504513 | 15.597799 | 17.975598 |
| 145.76 | 3.002547 | 4.880268 | 6.008599 | 8.584061 | 10.695431 | 13.495980 | 15.498447 | 17.893219 |
| 145.86 | 2.987280 | 4.889067 | 5.990409 | 8.532241 | 10.715206 | 13.403087 | 15.498871 | 17.905961 |
| 145.96 | 2.993276 | 4.867428 | 5.998806 | 8.538352 | 10.689636 | 13.454170 | 15.568646 | 17.938107 |
| 146.06 | 3.007359 | 4.865673 | 5.999614 | 8.566201 | 10.754145 | 13.445707 | 15.475282 | 17.888944 |
| 146.16 | 2.986168 | 4.865807 | 6.018987 | 8.580354 | 10.675660 | 13.481317 | 15.546964 | 17.963416 |
| 146.26 | 2.995618 | 4.881459 | 6.020736 | 8.530622 | 10.690959 | 13.464434 | 15.535538 | 17.959135 |
| 146.36 | 3.006090 | 4.883388 | 5.994702 | 8.579737 | 10.763767 | 13.423299 | 15.570259 | 17.843871 |
| 146.46 | 2.987829 | 4.894475 | 5.994310 | 8.542383 | 10.696445 | 13.409918 | 15.519471 | 17.927782 |
| 146.56 | 2.986781 | 4.892627 | 6.017255 | 8.538228 | 10.740949 | 13.445094 | 15.496354 | 17.921369 |
| 146.66 | 2.988442 | 4.867083 | 6.004517 | 8.529850 | 10.757056 | 13.502947 | 15.469610 | 17.898971 |
| 146.76 | 2.989239 | 4.886184 | 6.009336 | 8.582456 | 10.676584 | 13.498523 | 15.491230 | 17.859007 |
| 146.86 | 3.005918 | 4.863111 | 6.012201 | 8.519005 | 10.763743 | 13.428842 | 15.488037 | 17.924899 |
| 146.96 | 2.985455 | 4.862269 | 6.007203 | 8.575085 | 10.712162 | 13.467867 | 15.536297 | 17.902660 |
| 147.06 | 2.986547 | 4.859036 | 6.017753 | 8.534834 | 10.736430 | 13.489540 | 15.544215 | 17.829781 |
| 147.16 | 3.010329 | 4.888791 | 5.986637 | 8.564489 | 10.734406 | 13.502226 | 15.542140 | 17.879742 |
| 147.26 | 2.987918 | 4.890421 | 5.986508 | 8.546487 | 10.727202 | 13.482083 | 15.488535 | 17.952724 |
| 147.36 | 3.005797 | 4.878338 | 6.009755 | 8.580410 | 10.745006 | 13.504329 | 15.598095 | 17.929043 |
| 147.46 | 2.989133 | 4.864876 | 6.001130 | 8.583398 | 10.706389 | 13.389328 | 15.508981 | 17.945431 |
| 147.56 | 3.009308 | 4.866113 | 6.037827 | 8.534252 | 10.766329 | 13.413009 | 15.561649 | 17.934698 |
| 147.66 | 3.011645 | 4.863756 | 6.004028 | 8.573157 | 10.717225 | 13.471501 | 15.476924 | 17.904697 |
| 147.76 | 3.004011 | 4.890450 | 6.005969 | 8.582850 | 10.674786 | 13.399301 | 15.527549 | 17.862928 |
| 147.86 | 3.004017 | 4.875009 | 6.018786 | 8.512592 | 10.735072 | 13.482338 | 15.506898 | 17.844212 |
| 147.96 | 2.999466 | 4.899892 | 5.993536 | 8.528857 | 10.730484 | 13.488369 | 15.500529 | 17.945912 |
| 148.06 | 3.010108 | 4.883783 | 6.026397 | 8.585001 | 10.709135 | 13.467968 | 15.554739 | 17.838370 |
| 148.16 | 3.011836 | 4.882668 | 5.996795 | 8.575290 | 10.691855 | 13.471341 | 15.567489 | 17.920413 |
| 148.26 | 2.994764 | 4.899776 | 6.009714 | 8.582793 | 10.707780 | 13.468283 | 15.486132 | 17.883959 |
| 148.36 | 3.007935 | 4.861323 | 5.995651 | 8.527971 | 10.747220 | 13.417531 | 15.536431 | 17.831358 |
| 148.46 | 3.009457 | 4.894835 | 6.003210 | 8.544752 | 10.685340 | 13.450487 | 15.476809 | 17.842480 |
| 148.56 | 2.987763 | 4.889490 | 5.986045 | 8.571453 | 10.697114 | 13.431221 | 15.477799 | 17.896853 |
| 148.66 | 2.997864 | 4.868621 | 5.991508 | 8.560685 | 10.729249 | 13.451915 | 15.514701 | 17.919878 |
| 148.76 | 2.986748 | 4.863322 | 6.010712 | 8.515070 | 10.765781 | 13.398384 | 15.592336 | 17.931763 |
| 148.86 | 3.004640 | 4.900880 | 6.026881 | 8.575457 | 10.708852 | 13.490525 | 15.511033 | 17.898294 |
| 148.96 | 3.002715 | 4.867522 | 6.020412 | 8.568443 | 10.685474 | 13.444624 | 15.476642 | 17.908629 |
| 149.06 | 2.989955 | 4.869778 | 5.998243 | 8.546735 | 10.681626 | 13.424869 | 15.506225 | 17.908971 |
| 149.16 | 3.003827 | 4.896979 | 6.006961 | 8.561544 | 10.692375 | 13.472161 | 15.593027 | 17.906069 |
| 149.26 | 2.998587 | 4.864320 | 6.002515 | 8.521682 | 10.746975 | 13.390178 | 15.558670 | 17.919021 |
| 149.36 | 3.007021 | 4.867947 | 5.993833 | 8.553342 | 10.681001 | 13.412467 | 15.472736 | 17.862651 |
| 149.46 | 2.993166 | 4.879180 | 6.000754 | 8.569459 | 10.754702 | 13.495660 | 15.544018 | 17.947191 |
| 149.56 | 3.004863 | 4.874899 | 6.018562 | 8.527676 | 10.740459 | 13.463399 | 15.473626 | 17.848766 |
| 149.66 | 3.011545 | 4.890251 | 6.006693 | 8.512408 | 10.743152 | 13.493413 | 15.516165 | 17.921189 |
| 149.76 | 2.993738 | 4.879585 | 6.023398 | 8.542999 | 10.740328 | 13.438535 | 15.499458 | 17.957419 |
| 149.86 | 2.991231 | 4.884083 | 5.998425 | 8.561652 | 10.745730 | 13.505111 | 15.573666 | 17.835721 |
| 149.96 | 2.995074 | 4.874752 | 6.000539 | 8.552531 | 10.711919 | 13.452597 | 15.495988 | 17.926579 |
| 150.06 | 2.993761 | 4.899929 | 6.007770 | 8.566800 | 10.753882 | 13.389064 | 15.491521 | 17.933010 |

| YXX-1121 | 0.078125μM | 0.15625μM | 0.3125μM | 0.625μM | 1.25μM | 2.5μM | 5.0μM | 10μM |
| --- | --- | --- | --- | --- | --- | --- | --- | --- |
| -56.14 | -0.020229 | -0.024044 | -0.032571 | -0.034984 | -0.009181 | -0.011394 | -0.014102 | -0.016042 |
| -56.04 | -0.020112 | -0.023981 | -0.032525 | -0.034913 | -0.009197 | -0.011449 | -0.014188 | -0.016129 |
| -55.94 | -0.020043 | -0.023891 | -0.032351 | -0.034745 | -0.009274 | -0.011542 | -0.014280 | -0.016243 |
| -55.84 | -0.020019 | -0.023817 | -0.032305 | -0.034759 | -0.009263 | -0.011506 | -0.014260 | -0.016249 |
| -55.74 | -0.020033 | -0.023862 | -0.032458 | -0.034979 | -0.009160 | -0.011392 | -0.014159 | -0.016160 |
| -55.64 | -0.019894 | -0.023736 | -0.032151 | -0.034693 | -0.009166 | -0.011418 | -0.014130 | -0.016149 |
| -55.54 | -0.019800 | -0.023522 | -0.032001 | -0.034311 | -0.009192 | -0.011401 | -0.014172 | -0.016093 |
| -55.44 | -0.019762 | -0.023590 | -0.032002 | -0.034314 | -0.009174 | -0.011434 | -0.014173 | -0.016094 |
| -55.34 | -0.019713 | -0.023598 | -0.031919 | -0.034452 | -0.009152 | -0.011438 | -0.014136 | -0.016159 |
| -55.24 | -0.019784 | -0.023535 | -0.032020 | -0.034373 | -0.009185 | -0.011408 | -0.014181 | -0.016122 |
| -55.14 | -0.019786 | -0.023578 | -0.031892 | -0.034344 | -0.009186 | -0.011428 | -0.014124 | -0.016108 |
| -55.04 | -0.019742 | -0.023445 | -0.031825 | -0.034239 | -0.009165 | -0.011364 | -0.014094 | -0.016059 |
| -54.94 | -0.019804 | -0.023472 | -0.031801 | -0.034372 | -0.009103 | -0.011264 | -0.013944 | -0.015962 |
| -54.84 | -0.019606 | -0.023266 | -0.031788 | -0.033984 | -0.009081 | -0.011251 | -0.014045 | -0.015903 |
| -54.74 | -0.019685 | -0.023481 | -0.031825 | -0.034294 | -0.009048 | -0.011268 | -0.013954 | -0.015925 |
| -54.64 | -0.019625 | -0.023408 | -0.031592 | -0.034069 | -0.008998 | -0.011206 | -0.013819 | -0.015783 |
| -54.54 | -0.019752 | -0.023618 | -0.031858 | -0.034177 | -0.008988 | -0.011221 | -0.013829 | -0.015712 |
| -54.44 | -0.019647 | -0.023334 | -0.031567 | -0.034192 | -0.009009 | -0.011171 | -0.013808 | -0.015840 |
| -54.34 | -0.019547 | -0.023370 | -0.031717 | -0.034210 | -0.008872 | -0.011075 | -0.013733 | -0.015687 |
| -54.24 | -0.019882 | -0.023814 | -0.032097 | -0.034646 | -0.009069 | -0.011342 | -0.013967 | -0.015967 |
| -54.14 | -0.019885 | -0.023804 | -0.032106 | -0.034492 | -0.008980 | -0.011223 | -0.013831 | -0.015737 |
| -54.04 | -0.019982 | -0.023929 | -0.032362 | -0.034992 | -0.009137 | -0.011424 | -0.014117 | -0.016166 |
| -53.94 | -0.020058 | -0.023815 | -0.032263 | -0.034899 | -0.009281 | -0.011505 | -0.014241 | -0.016315 |
| -53.84 | -0.020105 | -0.023943 | -0.032263 | -0.034799 | -0.009303 | -0.011567 | -0.014241 | -0.016268 |
| -53.74 | -0.020030 | -0.023904 | -0.032449 | -0.034759 | -0.009541 | -0.011888 | -0.014745 | -0.016727 |
| -53.64 | -0.020476 | -0.024503 | -0.033221 | -0.035735 | -0.009357 | -0.011690 | -0.014481 | -0.016498 |
| -53.54 | -0.020613 | -0.024643 | -0.033359 | -0.036041 | -0.008956 | -0.011179 | -0.013827 | -0.015821 |
| -53.44 | -0.020894 | -0.024788 | -0.033684 | -0.036290 | -0.008921 | -0.011051 | -0.013720 | -0.015655 |
| -53.34 | -0.021724 | -0.025849 | -0.035123 | -0.037830 | -0.008527 | -0.010593 | -0.013151 | -0.015002 |
| -53.24 | -0.023995 | -0.028747 | -0.038821 | -0.041755 | -0.008220 | -0.010282 | -0.012687 | -0.014452 |
| -53.14 | -0.017816 | -0.021215 | -0.028891 | -0.031179 | -0.007757 | -0.009643 | -0.012000 | -0.013715 |
| -53.04 | -0.016080 | -0.019111 | -0.026008 | -0.027996 | -0.007711 | -0.009568 | -0.011898 | -0.013564 |
| -52.94 | -0.013636 | -0.016199 | -0.021924 | -0.023655 | -0.007618 | -0.009449 | -0.011685 | -0.013352 |
| -52.84 | -0.011564 | -0.013777 | -0.018810 | -0.020097 | -0.007478 | -0.009301 | -0.011603 | -0.013129 |
| -52.74 | -0.011727 | -0.014042 | -0.019018 | -0.020439 | -0.007576 | -0.009472 | -0.011722 | -0.013342 |
| -52.64 | -0.012946 | -0.015512 | -0.020987 | -0.022471 | -0.007478 | -0.009354 | -0.011564 | -0.013113 |
| -52.54 | -0.013873 | -0.016531 | -0.022514 | -0.024183 | -0.007037 | -0.008755 | -0.010894 | -0.012394 |
| -52.44 | -0.014489 | -0.017234 | -0.023477 | -0.025265 | -0.006830 | -0.008481 | -0.010557 | -0.012032 |
| -52.34 | -0.014945 | -0.017905 | -0.024225 | -0.026024 | -0.006941 | -0.008682 | -0.010733 | -0.012211 |
| -52.24 | -0.015697 | -0.018794 | -0.025427 | -0.027253 | -0.007290 | -0.009113 | -0.011266 | -0.012788 |
| -52.14 | -0.016087 | -0.019049 | -0.025961 | -0.027993 | -0.007514 | -0.009289 | -0.011567 | -0.013210 |
| -52.04 | -0.016200 | -0.019249 | -0.026283 | -0.028241 | -0.007587 | -0.009413 | -0.011743 | -0.013363 |
| -51.94 | -0.016136 | -0.019382 | -0.026219 | -0.028223 | -0.007557 | -0.009478 | -0.011714 | -0.013355 |
| -51.84 | -0.016331 | -0.019559 | -0.026373 | -0.028475 | -0.007578 | -0.009476 | -0.011675 | -0.013350 |
| -51.74 | -0.016533 | -0.019628 | -0.026757 | -0.028772 | -0.007602 | -0.009423 | -0.011736 | -0.013366 |
| -51.64 | -0.016503 | -0.019733 | -0.026602 | -0.028581 | -0.007697 | -0.009609 | -0.011836 | -0.013468 |
| -51.54 | -0.016570 | -0.019699 | -0.026648 | -0.028720 | -0.007820 | -0.009706 | -0.011997 | -0.013694 |
| -51.44 | -0.016599 | -0.019780 | -0.026956 | -0.028956 | -0.007672 | -0.009545 | -0.011885 | -0.013521 |
| -51.34 | -0.016619 | -0.019907 | -0.026903 | -0.028838 | -0.007772 | -0.009720 | -0.012002 | -0.013626 |
| -51.24 | -0.016590 | -0.019773 | -0.026815 | -0.028925 | -0.007758 | -0.009654 | -0.011963 | -0.013667 |
| -51.14 | -0.016616 | -0.019852 | -0.026901 | -0.028858 | -0.007861 | -0.009806 | -0.012142 | -0.013795 |
| -51.04 | -0.016471 | -0.019680 | -0.026753 | -0.028775 | -0.007864 | -0.009810 | -0.012185 | -0.013880 |
| -50.94 | -0.016557 | -0.019608 | -0.026634 | -0.028634 | -0.007905 | -0.009774 | -0.012131 | -0.013812 |
| -50.84 | -0.016526 | -0.019730 | -0.026666 | -0.028602 | -0.007890 | -0.009835 | -0.012145 | -0.013797 |
| -50.74 | -0.016367 | -0.019403 | -0.026382 | -0.028370 | -0.007886 | -0.009761 | -0.012127 | -0.013811 |
| -50.64 | -0.016560 | -0.019734 | -0.026684 | -0.028709 | -0.007907 | -0.009837 | -0.012154 | -0.013849 |
| -50.54 | -0.016572 | -0.019589 | -0.026758 | -0.028608 | -0.007912 | -0.009765 | -0.012187 | -0.013800 |
| -50.44 | -0.016530 | -0.019695 | -0.026753 | -0.028713 | -0.007892 | -0.009818 | -0.012185 | -0.013851 |
| -50.34 | -0.016683 | -0.019822 | -0.026876 | -0.028952 | -0.007984 | -0.009904 | -0.012270 | -0.013999 |
| -50.24 | -0.016877 | -0.020060 | -0.027074 | -0.029242 | -0.007990 | -0.009916 | -0.012228 | -0.013987 |
| -50.14 | -0.016799 | -0.020033 | -0.027071 | -0.029149 | -0.007953 | -0.009903 | -0.012227 | -0.013943 |
| -50.04 | -0.016914 | -0.020265 | -0.027371 | -0.029570 | -0.007937 | -0.009929 | -0.012253 | -0.014019 |
| -49.94 | -0.017050 | -0.020258 | -0.027515 | -0.029597 | -0.008001 | -0.009925 | -0.012317 | -0.014032 |
| -49.84 | -0.016799 | -0.020057 | -0.027143 | -0.029339 | -0.008044 | -0.010028 | -0.012399 | -0.014194 |
| -49.74 | -0.016815 | -0.020007 | -0.027077 | -0.029373 | -0.008052 | -0.010002 | -0.012369 | -0.014211 |
| -49.64 | -0.017023 | -0.020224 | -0.027351 | -0.029497 | -0.008080 | -0.010021 | -0.012383 | -0.014144 |
| -49.54 | -0.016780 | -0.019970 | -0.027197 | -0.029134 | -0.008035 | -0.009984 | -0.012424 | -0.014095 |
| -49.44 | -0.016824 | -0.019970 | -0.027311 | -0.029316 | -0.008147 | -0.010097 | -0.012616 | -0.014343 |
| -49.34 | -0.016837 | -0.020080 | -0.027224 | -0.029297 | -0.008154 | -0.010152 | -0.012576 | -0.014334 |
| -49.24 | -0.016717 | -0.019811 | -0.026910 | -0.028885 | -0.008183 | -0.010125 | -0.012566 | -0.014285 |
| -49.14 | -0.016695 | -0.019894 | -0.026916 | -0.028816 | -0.008172 | -0.010167 | -0.012569 | -0.014251 |
| -49.04 | -0.016592 | -0.019776 | -0.026932 | -0.028888 | -0.008031 | -0.009994 | -0.012436 | -0.014128 |
| -48.94 | -0.016428 | -0.019694 | -0.026569 | -0.028655 | -0.008025 | -0.010044 | -0.012380 | -0.014142 |
| -48.84 | -0.016287 | -0.019536 | -0.026307 | -0.028444 | -0.008029 | -0.010055 | -0.012371 | -0.014166 |
| -48.74 | -0.016395 | -0.019490 | -0.026394 | -0.028336 | -0.008082 | -0.010031 | -0.012412 | -0.014113 |
| -48.64 | -0.016305 | -0.019406 | -0.026463 | -0.028449 | -0.008038 | -0.009988 | -0.012445 | -0.014169 |
| -48.54 | -0.016366 | -0.019532 | -0.026342 | -0.028377 | -0.007977 | -0.009939 | -0.012248 | -0.013974 |
| -48.44 | -0.016319 | -0.019454 | -0.026525 | -0.028364 | -0.007954 | -0.009900 | -0.012333 | -0.013968 |
| -48.34 | -0.016205 | -0.019356 | -0.026241 | -0.028248 | -0.007972 | -0.009942 | -0.012314 | -0.014040 |
| -48.24 | -0.016142 | -0.019244 | -0.026141 | -0.028027 | -0.007850 | -0.009771 | -0.012127 | -0.013771 |
| -48.14 | -0.016131 | -0.019226 | -0.026179 | -0.028203 | -0.007845 | -0.009762 | -0.012145 | -0.013857 |
| -48.04 | -0.016201 | -0.019358 | -0.026087 | -0.028170 | -0.007879 | -0.009829 | -0.012102 | -0.013841 |
| -47.94 | -0.016083 | -0.019192 | -0.025943 | -0.027796 | -0.007895 | -0.009836 | -0.012148 | -0.013786 |
| -47.84 | -0.016092 | -0.019053 | -0.026026 | -0.027996 | -0.007899 | -0.009765 | -0.012187 | -0.013884 |
| -47.74 | -0.016007 | -0.019046 | -0.025812 | -0.027886 | -0.007858 | -0.009761 | -0.012087 | -0.013830 |
| -47.64 | -0.016103 | -0.019038 | -0.025842 | -0.027926 | -0.007813 | -0.009644 | -0.011961 | -0.013690 |
| -47.54 | -0.015915 | -0.018917 | -0.025778 | -0.027727 | -0.007795 | -0.009674 | -0.012045 | -0.013721 |
| -47.44 | -0.015946 | -0.019012 | -0.025726 | -0.027657 | -0.007810 | -0.009722 | -0.012020 | -0.013686 |
| -47.34 | -0.015879 | -0.018921 | -0.025780 | -0.027704 | -0.007778 | -0.009676 | -0.012046 | -0.013709 |
| -47.24 | -0.015998 | -0.019182 | -0.025818 | -0.027807 | -0.007762 | -0.009717 | -0.011950 | -0.013632 |
| -47.14 | -0.015826 | -0.018888 | -0.025693 | -0.027595 | -0.007752 | -0.009659 | -0.012005 | -0.013656 |
| -47.04 | -0.015880 | -0.018946 | -0.025787 | -0.027649 | -0.007687 | -0.009576 | -0.011908 | -0.013523 |
| -46.94 | -0.015957 | -0.018997 | -0.025779 | -0.027597 | -0.007724 | -0.009601 | -0.011904 | -0.013497 |
| -46.84 | -0.015800 | -0.018701 | -0.025438 | -0.027364 | -0.007722 | -0.009542 | -0.011860 | -0.013511 |
| -46.74 | -0.015796 | -0.018798 | -0.025410 | -0.027261 | -0.007610 | -0.009456 | -0.011678 | -0.013269 |
| -46.64 | -0.015810 | -0.018804 | -0.025333 | -0.027423 | -0.007617 | -0.009459 | -0.011643 | -0.013349 |
| -46.54 | -0.015738 | -0.018701 | -0.025361 | -0.027441 | -0.007583 | -0.009407 | -0.011656 | -0.013357 |
| -46.44 | -0.015782 | -0.018717 | -0.025475 | -0.027482 | -0.007512 | -0.009302 | -0.011568 | -0.013217 |
| -46.34 | -0.015613 | -0.018517 | -0.025265 | -0.027088 | -0.007412 | -0.009178 | -0.011443 | -0.012993 |
| -46.24 | -0.015562 | -0.018599 | -0.025304 | -0.026993 | -0.007388 | -0.009219 | -0.011460 | -0.012948 |
| -46.14 | -0.015612 | -0.018521 | -0.025297 | -0.027152 | -0.007412 | -0.009180 | -0.011457 | -0.013024 |
| -46.04 | -0.015431 | -0.018388 | -0.024888 | -0.026798 | -0.007307 | -0.009090 | -0.011242 | -0.012820 |
| -45.94 | -0.015431 | -0.018403 | -0.025030 | -0.026925 | -0.007307 | -0.009098 | -0.011306 | -0.012881 |
| -45.84 | -0.015378 | -0.018444 | -0.025047 | -0.026833 | -0.007281 | -0.009118 | -0.011314 | -0.012837 |
| -45.74 | -0.015502 | -0.018348 | -0.024855 | -0.026789 | -0.007340 | -0.009071 | -0.011227 | -0.012815 |
| -45.64 | -0.015493 | -0.018321 | -0.024969 | -0.026842 | -0.007336 | -0.009057 | -0.011278 | -0.012841 |
| -45.54 | -0.015424 | -0.018452 | -0.024944 | -0.026796 | -0.007213 | -0.009009 | -0.011127 | -0.012660 |
| -45.44 | -0.015270 | -0.018228 | -0.024673 | -0.026508 | -0.007225 | -0.009005 | -0.011137 | -0.012672 |
| -45.34 | -0.015205 | -0.018179 | -0.024635 | -0.026469 | -0.007104 | -0.008867 | -0.010979 | -0.012494 |
| -45.24 | -0.015317 | -0.018165 | -0.024723 | -0.026630 | -0.007156 | -0.008860 | -0.011018 | -0.012570 |
| -45.14 | -0.015132 | -0.018056 | -0.024325 | -0.026192 | -0.007140 | -0.008895 | -0.010949 | -0.012486 |
| -45.04 | -0.015126 | -0.017969 | -0.024463 | -0.026352 | -0.007046 | -0.008739 | -0.010871 | -0.012402 |
| -44.94 | -0.014988 | -0.017782 | -0.024266 | -0.025999 | -0.006961 | -0.008622 | -0.010751 | -0.012200 |
| -44.84 | -0.015175 | -0.017949 | -0.024431 | -0.026207 | -0.006868 | -0.008482 | -0.010548 | -0.011983 |
| -44.74 | -0.014987 | -0.017801 | -0.024277 | -0.025987 | -0.006851 | -0.008496 | -0.010587 | -0.012002 |
| -44.64 | -0.014935 | -0.017832 | -0.024073 | -0.026076 | -0.006827 | -0.008511 | -0.010498 | -0.012043 |
| -44.54 | -0.015000 | -0.017827 | -0.024209 | -0.025929 | -0.006857 | -0.008509 | -0.010557 | -0.011975 |
| -44.44 | -0.014965 | -0.017872 | -0.024248 | -0.025978 | -0.006750 | -0.008417 | -0.010433 | -0.011838 |
| -44.34 | -0.014792 | -0.017691 | -0.024032 | -0.025824 | -0.006649 | -0.008303 | -0.010305 | -0.011728 |
| -44.24 | -0.014757 | -0.017588 | -0.023955 | -0.025771 | -0.006543 | -0.008142 | -0.010132 | -0.011544 |
| -44.14 | -0.014616 | -0.017473 | -0.023650 | -0.025412 | -0.006547 | -0.008171 | -0.010105 | -0.011500 |
| -44.04 | -0.014694 | -0.017405 | -0.023691 | -0.025396 | -0.006490 | -0.008027 | -0.009982 | -0.011333 |
| -43.94 | -0.014710 | -0.017409 | -0.023623 | -0.025580 | -0.006498 | -0.008029 | -0.009954 | -0.011415 |
| -43.84 | -0.014687 | -0.017489 | -0.023643 | -0.025382 | -0.006487 | -0.008065 | -0.009962 | -0.011327 |
| -43.74 | -0.014653 | -0.017428 | -0.023720 | -0.025434 | -0.006382 | -0.007924 | -0.009854 | -0.011191 |
| -43.64 | -0.014622 | -0.017527 | -0.023640 | -0.025555 | -0.006368 | -0.007969 | -0.009821 | -0.011244 |
| -43.54 | -0.014604 | -0.017475 | -0.023752 | -0.025444 | -0.006270 | -0.007832 | -0.009727 | -0.011036 |
| -43.44 | -0.014718 | -0.017477 | -0.023732 | -0.025520 | -0.006318 | -0.007833 | -0.009719 | -0.011069 |
| -43.34 | -0.014636 | -0.017414 | -0.023704 | -0.025504 | -0.006193 | -0.007692 | -0.009567 | -0.010902 |
| -43.24 | -0.014666 | -0.017411 | -0.023681 | -0.025381 | -0.006205 | -0.007691 | -0.009558 | -0.010849 |
| -43.14 | -0.014519 | -0.017247 | -0.023454 | -0.025227 | -0.006207 | -0.007698 | -0.009565 | -0.010895 |
| -43.04 | -0.014510 | -0.017305 | -0.023515 | -0.025252 | -0.006112 | -0.007611 | -0.009449 | -0.010746 |
| -42.94 | -0.014458 | -0.017364 | -0.023359 | -0.025221 | -0.006090 | -0.007636 | -0.009386 | -0.010733 |
| -42.84 | -0.014525 | -0.017353 | -0.023397 | -0.025185 | -0.006118 | -0.007632 | -0.009401 | -0.010718 |
| -42.74 | -0.014483 | -0.017359 | -0.023340 | -0.025272 | -0.005991 | -0.007498 | -0.009211 | -0.010563 |
| -42.64 | -0.014569 | -0.017271 | -0.023447 | -0.025168 | -0.006137 | -0.007595 | -0.009422 | -0.010711 |
| -42.54 | -0.014554 | -0.017253 | -0.023368 | -0.025115 | -0.006021 | -0.007452 | -0.009222 | -0.010497 |
| -42.44 | -0.014648 | -0.017455 | -0.023736 | -0.025388 | -0.005998 | -0.007462 | -0.009271 | -0.010502 |
| -42.34 | -0.014475 | -0.017327 | -0.023524 | -0.025157 | -0.005988 | -0.007484 | -0.009284 | -0.010515 |
| -42.24 | -0.014513 | -0.017220 | -0.023357 | -0.025204 | -0.006004 | -0.007438 | -0.009218 | -0.010534 |
| -42.14 | -0.014477 | -0.017328 | -0.023536 | -0.025331 | -0.005898 | -0.007371 | -0.009148 | -0.010427 |
| -42.04 | -0.014535 | -0.017289 | -0.023471 | -0.025274 | -0.005922 | -0.007354 | -0.009122 | -0.010404 |
| -41.94 | -0.014570 | -0.017322 | -0.023526 | -0.025324 | -0.005936 | -0.007369 | -0.009144 | -0.010424 |
| -41.84 | -0.014387 | -0.017161 | -0.023124 | -0.024963 | -0.005923 | -0.007376 | -0.009082 | -0.010383 |
| -41.74 | -0.014389 | -0.017114 | -0.023185 | -0.024887 | -0.005833 | -0.007243 | -0.008965 | -0.010193 |
| -41.64 | -0.014367 | -0.017117 | -0.023231 | -0.025013 | -0.005824 | -0.007244 | -0.008984 | -0.010244 |
| -41.54 | -0.014411 | -0.017156 | -0.023146 | -0.024934 | -0.005842 | -0.007261 | -0.008951 | -0.010212 |
| -41.44 | -0.014404 | -0.017094 | -0.023138 | -0.025063 | -0.005839 | -0.007235 | -0.008948 | -0.010265 |
| -41.34 | -0.014226 | -0.017002 | -0.023056 | -0.024715 | -0.005828 | -0.007272 | -0.009010 | -0.010229 |
| -41.24 | -0.014273 | -0.016976 | -0.023049 | -0.024690 | -0.005847 | -0.007261 | -0.009007 | -0.010219 |
| -41.14 | -0.014152 | -0.016979 | -0.022884 | -0.024650 | -0.005707 | -0.007149 | -0.008803 | -0.010043 |
| -41.04 | -0.013980 | -0.016790 | -0.022685 | -0.024335 | -0.005710 | -0.007160 | -0.008839 | -0.010042 |
| -40.94 | -0.014048 | -0.016740 | -0.022638 | -0.024402 | -0.005829 | -0.007252 | -0.008961 | -0.010230 |
| -40.84 | -0.014003 | -0.016683 | -0.022579 | -0.024296 | -0.005810 | -0.007227 | -0.008938 | -0.010185 |
| -40.74 | -0.013984 | -0.016756 | -0.022714 | -0.024287 | -0.005712 | -0.007146 | -0.008850 | -0.010023 |
| -40.64 | -0.013849 | -0.016468 | -0.022471 | -0.024042 | -0.005809 | -0.007212 | -0.008991 | -0.010188 |
| -40.54 | -0.013860 | -0.016516 | -0.022495 | -0.024193 | -0.005813 | -0.007233 | -0.009001 | -0.010252 |
| -40.44 | -0.013927 | -0.016530 | -0.022410 | -0.024057 | -0.005842 | -0.007239 | -0.008967 | -0.010195 |
| -40.34 | -0.013919 | -0.016477 | -0.022437 | -0.024118 | -0.005838 | -0.007215 | -0.008977 | -0.010220 |
| -40.24 | -0.013882 | -0.016534 | -0.022404 | -0.024142 | -0.005823 | -0.007240 | -0.008964 | -0.010231 |
| -40.14 | -0.013930 | -0.016505 | -0.022361 | -0.024043 | -0.005843 | -0.007228 | -0.008947 | -0.010188 |
| -40.04 | -0.013857 | -0.016526 | -0.022491 | -0.024017 | -0.005812 | -0.007237 | -0.008999 | -0.010178 |
| -39.94 | -0.013822 | -0.016580 | -0.022337 | -0.024112 | -0.005707 | -0.007147 | -0.008798 | -0.010058 |
| -39.84 | -0.013852 | -0.016592 | -0.022440 | -0.024082 | -0.005810 | -0.007266 | -0.008979 | -0.010205 |
| -39.74 | -0.013903 | -0.016505 | -0.022431 | -0.024189 | -0.005740 | -0.007115 | -0.008835 | -0.010090 |
| -39.64 | -0.013927 | -0.016519 | -0.022371 | -0.024086 | -0.005750 | -0.007121 | -0.008811 | -0.010047 |
| -39.54 | -0.013675 | -0.016296 | -0.022134 | -0.023793 | -0.005708 | -0.007102 | -0.008813 | -0.010034 |
| -39.44 | -0.013788 | -0.016403 | -0.022241 | -0.023920 | -0.005755 | -0.007148 | -0.008856 | -0.010087 |
| -39.34 | -0.013699 | -0.016419 | -0.022082 | -0.023850 | -0.005718 | -0.007155 | -0.008793 | -0.010058 |
| -39.24 | -0.013619 | -0.016183 | -0.021924 | -0.023639 | -0.005657 | -0.007018 | -0.008687 | -0.009920 |
| -39.14 | -0.013603 | -0.016191 | -0.021988 | -0.023641 | -0.005650 | -0.007021 | -0.008712 | -0.009920 |
| -39.04 | -0.013553 | -0.016208 | -0.021920 | -0.023569 | -0.005720 | -0.007142 | -0.008825 | -0.010050 |
| -38.94 | -0.013449 | -0.016054 | -0.021733 | -0.023324 | -0.005740 | -0.007153 | -0.008848 | -0.010057 |
| -38.84 | -0.013446 | -0.015938 | -0.021735 | -0.023288 | -0.005738 | -0.007102 | -0.008849 | -0.010041 |
| -38.74 | -0.013413 | -0.015934 | -0.021741 | -0.023311 | -0.005724 | -0.007100 | -0.008851 | -0.010051 |
| -38.64 | -0.013227 | -0.015879 | -0.021494 | -0.023144 | -0.005709 | -0.007155 | -0.008850 | -0.010092 |
| -38.54 | -0.013299 | -0.015838 | -0.021371 | -0.023083 | -0.005740 | -0.007137 | -0.008799 | -0.010066 |
| -38.44 | -0.013257 | -0.015835 | -0.021382 | -0.022979 | -0.005722 | -0.007136 | -0.008804 | -0.010020 |
| -38.34 | -0.013283 | -0.015756 | -0.021391 | -0.023068 | -0.005733 | -0.007100 | -0.008807 | -0.010059 |
| -38.24 | -0.013277 | -0.015816 | -0.021432 | -0.022972 | -0.005731 | -0.007127 | -0.008824 | -0.010017 |
| -38.14 | -0.013165 | -0.015635 | -0.021160 | -0.022869 | -0.005747 | -0.007126 | -0.008812 | -0.010087 |
| -38.04 | -0.013177 | -0.015634 | -0.021230 | -0.022825 | -0.005753 | -0.007126 | -0.008841 | -0.010067 |
| -37.94 | -0.013133 | -0.015665 | -0.021197 | -0.022904 | -0.005642 | -0.007027 | -0.008687 | -0.009942 |
| -37.84 | -0.013012 | -0.015523 | -0.020987 | -0.022519 | -0.005746 | -0.007157 | -0.008842 | -0.010048 |
| -37.74 | -0.012959 | -0.015512 | -0.020929 | -0.022528 | -0.005723 | -0.007152 | -0.008817 | -0.010052 |
| -37.64 | -0.013021 | -0.015487 | -0.021044 | -0.022648 | -0.005659 | -0.007027 | -0.008725 | -0.009944 |
| -37.54 | -0.012943 | -0.015502 | -0.020961 | -0.022523 | -0.005625 | -0.007034 | -0.008690 | -0.009890 |
| -37.44 | -0.012795 | -0.015237 | -0.020701 | -0.022282 | -0.005730 | -0.007125 | -0.008844 | -0.010082 |
| -37.34 | -0.012802 | -0.015285 | -0.020656 | -0.022191 | -0.005733 | -0.007147 | -0.008825 | -0.010041 |
| -37.24 | -0.012786 | -0.015252 | -0.020629 | -0.022179 | -0.005726 | -0.007131 | -0.008813 | -0.010036 |
| -37.14 | -0.012755 | -0.015270 | -0.020697 | -0.022216 | -0.005713 | -0.007140 | -0.008842 | -0.010052 |
| -37.04 | -0.012678 | -0.015097 | -0.020474 | -0.022012 | -0.005746 | -0.007143 | -0.008851 | -0.010079 |
| -36.94 | -0.012688 | -0.015030 | -0.020353 | -0.021917 | -0.005750 | -0.007111 | -0.008799 | -0.010035 |
| -36.84 | -0.012544 | -0.014846 | -0.020168 | -0.021678 | -0.005753 | -0.007109 | -0.008824 | -0.010045 |
| -36.74 | -0.012509 | -0.014860 | -0.020110 | -0.021645 | -0.005737 | -0.007116 | -0.008799 | -0.010030 |
| -36.64 | -0.012294 | -0.014767 | -0.020016 | -0.021522 | -0.005707 | -0.007157 | -0.008864 | -0.010094 |
| -36.54 | -0.012344 | -0.014715 | -0.019957 | -0.021407 | -0.005731 | -0.007132 | -0.008838 | -0.010040 |
| -36.44 | -0.012169 | -0.014491 | -0.019695 | -0.021131 | -0.005719 | -0.007110 | -0.008830 | -0.010034 |
| -36.34 | -0.012244 | -0.014512 | -0.019615 | -0.021171 | -0.005663 | -0.007008 | -0.008654 | -0.009893 |
| -36.24 | -0.012047 | -0.014391 | -0.019483 | -0.020937 | -0.005732 | -0.007149 | -0.008844 | -0.010065 |
| -36.14 | -0.012054 | -0.014323 | -0.019397 | -0.020991 | -0.005645 | -0.007003 | -0.008665 | -0.009931 |
| -36.04 | -0.012004 | -0.014304 | -0.019446 | -0.020865 | -0.005621 | -0.006993 | -0.008687 | -0.009872 |
| -35.94 | -0.011877 | -0.014196 | -0.019128 | -0.020661 | -0.005542 | -0.006915 | -0.008514 | -0.009739 |
| -35.84 | -0.011907 | -0.014207 | -0.019282 | -0.020733 | -0.005646 | -0.007034 | -0.008723 | -0.009933 |
| -35.74 | -0.011864 | -0.014109 | -0.019135 | -0.020739 | -0.005535 | -0.006873 | -0.008517 | -0.009776 |
| -35.64 | -0.011723 | -0.014008 | -0.018912 | -0.020415 | -0.005540 | -0.006911 | -0.008525 | -0.009747 |
| -35.54 | -0.011765 | -0.013966 | -0.018935 | -0.020421 | -0.005559 | -0.006890 | -0.008536 | -0.009750 |
| -35.44 | -0.011739 | -0.013980 | -0.019027 | -0.020379 | -0.005456 | -0.006784 | -0.008437 | -0.009570 |
| -35.34 | -0.011630 | -0.013769 | -0.018755 | -0.020190 | -0.005476 | -0.006769 | -0.008424 | -0.009604 |
| -35.24 | -0.011608 | -0.013790 | -0.018806 | -0.020181 | -0.005465 | -0.006779 | -0.008447 | -0.009600 |
| -35.14 | -0.011545 | -0.013811 | -0.018764 | -0.020099 | -0.005436 | -0.006789 | -0.008428 | -0.009561 |
| -35.04 | -0.011434 | -0.013537 | -0.018408 | -0.019759 | -0.005469 | -0.006760 | -0.008399 | -0.009548 |
| -34.94 | -0.011436 | -0.013537 | -0.018452 | -0.019810 | -0.005379 | -0.006647 | -0.008279 | -0.009413 |
| -34.84 | -0.011417 | -0.013584 | -0.018409 | -0.019855 | -0.005370 | -0.006670 | -0.008259 | -0.009435 |
| -34.74 | -0.011225 | -0.013399 | -0.018259 | -0.019639 | -0.005350 | -0.006667 | -0.008302 | -0.009457 |
| -34.64 | -0.011249 | -0.013411 | -0.018220 | -0.019598 | -0.005252 | -0.006538 | -0.008115 | -0.009245 |
| -34.54 | -0.011079 | -0.013216 | -0.017986 | -0.019391 | -0.005243 | -0.006530 | -0.008120 | -0.009271 |
| -34.44 | -0.011110 | -0.013190 | -0.018022 | -0.019358 | -0.005258 | -0.006517 | -0.008136 | -0.009256 |
| -34.34 | -0.011086 | -0.013210 | -0.018027 | -0.019339 | -0.005246 | -0.006527 | -0.008139 | -0.009247 |
| -34.24 | -0.010914 | -0.013004 | -0.017774 | -0.019002 | -0.005145 | -0.006401 | -0.007994 | -0.009051 |
| -34.14 | -0.010936 | -0.013008 | -0.017700 | -0.019093 | -0.005156 | -0.006403 | -0.007960 | -0.009094 |
| -34.04 | -0.010778 | -0.012903 | -0.017403 | -0.018826 | -0.005152 | -0.006440 | -0.007936 | -0.009092 |
| -33.94 | -0.010844 | -0.012857 | -0.017524 | -0.018852 | -0.005184 | -0.006417 | -0.007991 | -0.009105 |
| -33.84 | -0.010761 | -0.012843 | -0.017445 | -0.018846 | -0.005053 | -0.006297 | -0.007815 | -0.008941 |
| -33.74 | -0.010613 | -0.012663 | -0.017165 | -0.018546 | -0.005145 | -0.006409 | -0.007938 | -0.009083 |
| -33.64 | -0.010637 | -0.012709 | -0.017155 | -0.018596 | -0.005065 | -0.006319 | -0.007794 | -0.008947 |
| -33.54 | -0.010660 | -0.012647 | -0.017150 | -0.018553 | -0.005077 | -0.006288 | -0.007791 | -0.008927 |
| -33.44 | -0.010508 | -0.012521 | -0.016964 | -0.018255 | -0.005076 | -0.006315 | -0.007817 | -0.008909 |
| -33.34 | -0.010478 | -0.012491 | -0.016916 | -0.018200 | -0.004971 | -0.006187 | -0.007655 | -0.008723 |
| -33.24 | -0.010402 | -0.012381 | -0.016802 | -0.017961 | -0.005006 | -0.006221 | -0.007714 | -0.008733 |
| -33.14 | -0.010396 | -0.012347 | -0.016777 | -0.017978 | -0.005004 | -0.006204 | -0.007703 | -0.008742 |
| -33.04 | -0.010369 | -0.012390 | -0.016766 | -0.017963 | -0.004990 | -0.006226 | -0.007698 | -0.008735 |
| -32.94 | -0.010137 | -0.012110 | -0.016434 | -0.017678 | -0.004965 | -0.006193 | -0.007679 | -0.008749 |
| -32.84 | -0.010166 | -0.012111 | -0.016471 | -0.017731 | -0.004980 | -0.006194 | -0.007696 | -0.008775 |
| -32.74 | -0.010062 | -0.011948 | -0.016143 | -0.017425 | -0.004911 | -0.006089 | -0.007517 | -0.008593 |
| -32.64 | -0.010043 | -0.011990 | -0.016147 | -0.017498 | -0.004902 | -0.006110 | -0.007519 | -0.008629 |
| -32.54 | -0.009852 | -0.011720 | -0.015940 | -0.017165 | -0.004792 | -0.005951 | -0.007396 | -0.008434 |
| -32.44 | -0.009860 | -0.011760 | -0.015906 | -0.017133 | -0.004795 | -0.005972 | -0.007380 | -0.008418 |
| -32.34 | -0.009731 | -0.011558 | -0.015737 | -0.016890 | -0.004806 | -0.005960 | -0.007414 | -0.008428 |
| -32.24 | -0.009607 | -0.011384 | -0.015533 | -0.016638 | -0.004819 | -0.005963 | -0.007433 | -0.008433 |
| -32.14 | -0.009399 | -0.011223 | -0.015230 | -0.016343 | -0.004790 | -0.005972 | -0.007405 | -0.008415 |
| -32.04 | -0.009291 | -0.011029 | -0.015033 | -0.016149 | -0.004812 | -0.005964 | -0.007427 | -0.008450 |
| -31.94 | -0.009276 | -0.011070 | -0.014970 | -0.016105 | -0.004713 | -0.005872 | -0.007256 | -0.008268 |
| -31.84 | -0.009088 | -0.010888 | -0.014736 | -0.015919 | -0.004785 | -0.005985 | -0.007401 | -0.008468 |
| -31.74 | -0.008976 | -0.010661 | -0.014421 | -0.015571 | -0.004821 | -0.005978 | -0.007389 | -0.008450 |
| -31.64 | -0.008940 | -0.010635 | -0.014509 | -0.015604 | -0.004802 | -0.005964 | -0.007434 | -0.008468 |
| -31.54 | -0.008943 | -0.010631 | -0.014419 | -0.015555 | -0.004712 | -0.005849 | -0.007248 | -0.008281 |
| -31.44 | -0.008827 | -0.010448 | -0.014256 | -0.015314 | -0.004731 | -0.005847 | -0.007289 | -0.008292 |
| -31.34 | -0.008643 | -0.010249 | -0.013904 | -0.015028 | -0.004713 | -0.005835 | -0.007233 | -0.008279 |
| -31.24 | -0.008618 | -0.010326 | -0.013951 | -0.015067 | -0.004609 | -0.005765 | -0.007117 | -0.008141 |
| -31.14 | -0.008608 | -0.010320 | -0.013979 | -0.015042 | -0.004603 | -0.005762 | -0.007131 | -0.008127 |
| -31.04 | -0.008610 | -0.010334 | -0.014021 | -0.015073 | -0.004604 | -0.005770 | -0.007153 | -0.008144 |
| -30.94 | -0.008513 | -0.010127 | -0.013673 | -0.014800 | -0.004633 | -0.005754 | -0.007099 | -0.008138 |
| -30.84 | -0.008474 | -0.010118 | -0.013723 | -0.014804 | -0.004503 | -0.005614 | -0.006957 | -0.007948 |
| -30.74 | -0.008515 | -0.010085 | -0.013681 | -0.014750 | -0.004525 | -0.005595 | -0.006935 | -0.007919 |
| -30.64 | -0.008459 | -0.010128 | -0.013752 | -0.014736 | -0.004495 | -0.005619 | -0.006971 | -0.007912 |
| -30.54 | -0.008370 | -0.009918 | -0.013444 | -0.014521 | -0.004528 | -0.005602 | -0.006938 | -0.007937 |
| -30.44 | -0.008351 | -0.009950 | -0.013441 | -0.014439 | -0.004518 | -0.005620 | -0.006937 | -0.007892 |
| -30.34 | -0.008199 | -0.009782 | -0.013200 | -0.014224 | -0.004517 | -0.005626 | -0.006938 | -0.007917 |
| -30.24 | -0.008203 | -0.009715 | -0.013275 | -0.014198 | -0.004428 | -0.005475 | -0.006836 | -0.007744 |
| -30.14 | -0.008005 | -0.009545 | -0.013004 | -0.013974 | -0.004402 | -0.005480 | -0.006822 | -0.007764 |
| -30.04 | -0.008039 | -0.009589 | -0.012981 | -0.013989 | -0.004421 | -0.005505 | -0.006810 | -0.007773 |
| -29.94 | -0.007882 | -0.009430 | -0.012693 | -0.013713 | -0.004417 | -0.005518 | -0.006786 | -0.007764 |
| -29.84 | -0.007875 | -0.009358 | -0.012744 | -0.013770 | -0.004323 | -0.005363 | -0.006673 | -0.007636 |
| -29.74 | -0.007758 | -0.009219 | -0.012539 | -0.013420 | -0.004341 | -0.005386 | -0.006693 | -0.007587 |
| -29.64 | -0.007537 | -0.009023 | -0.012234 | -0.013174 | -0.004318 | -0.005397 | -0.006687 | -0.007626 |
| -29.54 | -0.007565 | -0.008986 | -0.012195 | -0.013076 | -0.004334 | -0.005376 | -0.006666 | -0.007569 |
| -29.44 | -0.007568 | -0.009014 | -0.012206 | -0.013106 | -0.004336 | -0.005392 | -0.006671 | -0.007587 |
| -29.34 | -0.007410 | -0.008860 | -0.011981 | -0.012902 | -0.004241 | -0.005294 | -0.006541 | -0.007460 |
| -29.24 | -0.007389 | -0.008805 | -0.012001 | -0.012825 | -0.004229 | -0.005261 | -0.006552 | -0.007416 |
| -29.14 | -0.007279 | -0.008625 | -0.011721 | -0.012634 | -0.004252 | -0.005261 | -0.006532 | -0.007457 |
| -29.04 | -0.007252 | -0.008618 | -0.011723 | -0.012632 | -0.004236 | -0.005256 | -0.006533 | -0.007456 |
| -28.94 | -0.007076 | -0.008442 | -0.011476 | -0.012294 | -0.004222 | -0.005258 | -0.006531 | -0.007410 |
| -28.84 | -0.007100 | -0.008439 | -0.011482 | -0.012297 | -0.004145 | -0.005143 | -0.006394 | -0.007253 |
| -28.74 | -0.007086 | -0.008445 | -0.011454 | -0.012320 | -0.004137 | -0.005147 | -0.006379 | -0.007266 |
| -28.64 | -0.006986 | -0.008265 | -0.011278 | -0.012066 | -0.004166 | -0.005146 | -0.006417 | -0.007270 |
| -28.54 | -0.006790 | -0.008093 | -0.011018 | -0.011785 | -0.004139 | -0.005151 | -0.006407 | -0.007258 |
| -28.44 | -0.006811 | -0.008092 | -0.010977 | -0.011852 | -0.004152 | -0.005150 | -0.006383 | -0.007300 |
| -28.34 | -0.006683 | -0.007948 | -0.010735 | -0.011577 | -0.004075 | -0.005059 | -0.006244 | -0.007131 |
| -28.24 | -0.006659 | -0.007961 | -0.010778 | -0.011600 | -0.004060 | -0.005068 | -0.006269 | -0.007146 |
| -28.14 | -0.006676 | -0.007945 | -0.010727 | -0.011539 | -0.004070 | -0.005058 | -0.006239 | -0.007108 |
| -28.04 | -0.006644 | -0.007924 | -0.010790 | -0.011571 | -0.003960 | -0.004931 | -0.006135 | -0.006968 |
| -27.94 | -0.006521 | -0.007716 | -0.010488 | -0.011269 | -0.003977 | -0.004913 | -0.006102 | -0.006943 |
| -27.84 | -0.006494 | -0.007751 | -0.010527 | -0.011287 | -0.003960 | -0.004935 | -0.006124 | -0.006954 |
| -27.74 | -0.006514 | -0.007717 | -0.010494 | -0.011299 | -0.003882 | -0.004801 | -0.005965 | -0.006802 |
| -27.64 | -0.006305 | -0.007515 | -0.010206 | -0.010952 | -0.003864 | -0.004809 | -0.005967 | -0.006782 |
| -27.54 | -0.006314 | -0.007545 | -0.010210 | -0.010973 | -0.003870 | -0.004828 | -0.005969 | -0.006794 |
| -27.44 | -0.006324 | -0.007520 | -0.010252 | -0.011033 | -0.003785 | -0.004699 | -0.005853 | -0.006671 |
| -27.34 | -0.006324 | -0.007533 | -0.010256 | -0.011034 | -0.003785 | -0.004707 | -0.005856 | -0.006672 |
| -27.24 | -0.006339 | -0.007552 | -0.010196 | -0.011031 | -0.003794 | -0.004719 | -0.005821 | -0.006670 |
| -27.14 | -0.006153 | -0.007367 | -0.009954 | -0.010746 | -0.003663 | -0.004579 | -0.005654 | -0.006464 |
| -27.04 | -0.006176 | -0.007363 | -0.009948 | -0.010769 | -0.003677 | -0.004577 | -0.005650 | -0.006478 |
| -26.94 | -0.006344 | -0.007551 | -0.010207 | -0.011022 | -0.003687 | -0.004582 | -0.005659 | -0.006472 |
| -26.84 | -0.006177 | -0.007350 | -0.009957 | -0.010702 | -0.003587 | -0.004456 | -0.005516 | -0.006278 |
| -26.74 | -0.006169 | -0.007363 | -0.009989 | -0.010724 | -0.003582 | -0.004464 | -0.005533 | -0.006291 |
| -26.64 | -0.006188 | -0.007348 | -0.009964 | -0.010689 | -0.003502 | -0.004341 | -0.005379 | -0.006112 |
| -26.54 | -0.006199 | -0.007328 | -0.009994 | -0.010688 | -0.003508 | -0.004330 | -0.005396 | -0.006111 |
| -26.44 | -0.006188 | -0.007385 | -0.009982 | -0.010730 | -0.003502 | -0.004364 | -0.005389 | -0.006135 |
| -26.34 | -0.006199 | -0.007369 | -0.009951 | -0.010717 | -0.003508 | -0.004354 | -0.005372 | -0.006127 |
| -26.24 | -0.006017 | -0.007159 | -0.009708 | -0.010473 | -0.003490 | -0.004336 | -0.005372 | -0.006138 |
| -26.14 | -0.006014 | -0.007164 | -0.009688 | -0.010499 | -0.003398 | -0.004226 | -0.005222 | -0.005993 |
| -26.04 | -0.006027 | -0.007205 | -0.009713 | -0.010491 | -0.003314 | -0.004137 | -0.005095 | -0.005828 |
| -25.94 | -0.006030 | -0.007159 | -0.009708 | -0.010506 | -0.003316 | -0.004110 | -0.005092 | -0.005836 |
| -25.84 | -0.005998 | -0.007171 | -0.009738 | -0.010461 | -0.003298 | -0.004117 | -0.005108 | -0.005812 |
| -25.74 | -0.005884 | -0.007013 | -0.009488 | -0.010177 | -0.003227 | -0.004016 | -0.004964 | -0.005639 |
| -25.64 | -0.005846 | -0.006991 | -0.009462 | -0.010219 | -0.003116 | -0.003890 | -0.004811 | -0.005503 |
| -25.54 | -0.005860 | -0.007015 | -0.009484 | -0.010243 | -0.003123 | -0.003903 | -0.004822 | -0.005516 |
| -25.44 | -0.005725 | -0.006845 | -0.009280 | -0.009915 | -0.003131 | -0.003909 | -0.004842 | -0.005480 |
| -25.34 | -0.005696 | -0.006826 | -0.009253 | -0.009941 | -0.003116 | -0.003898 | -0.004829 | -0.005494 |
| -25.24 | -0.005729 | -0.006840 | -0.009270 | -0.009932 | -0.003043 | -0.003793 | -0.004696 | -0.005329 |
| -25.14 | -0.005593 | -0.006622 | -0.008997 | -0.009695 | -0.003051 | -0.003771 | -0.004682 | -0.005343 |
| -25.04 | -0.005590 | -0.006614 | -0.008965 | -0.009645 | -0.003049 | -0.003767 | -0.004665 | -0.005315 |
| -24.94 | -0.005591 | -0.006626 | -0.009006 | -0.009689 | -0.002940 | -0.003638 | -0.004518 | -0.005147 |
| -24.84 | -0.005583 | -0.006651 | -0.009031 | -0.009694 | -0.002936 | -0.003652 | -0.004530 | -0.005150 |
| -24.74 | -0.005437 | -0.006465 | -0.008791 | -0.009389 | -0.002939 | -0.003648 | -0.004532 | -0.005127 |
| -24.64 | -0.005440 | -0.006464 | -0.008747 | -0.009377 | -0.002849 | -0.003534 | -0.004370 | -0.004961 |
| -24.54 | -0.005285 | -0.006305 | -0.008475 | -0.009136 | -0.002847 | -0.003546 | -0.004355 | -0.004972 |
| -24.44 | -0.005250 | -0.006296 | -0.008535 | -0.009144 | -0.002737 | -0.003427 | -0.004245 | -0.004817 |
| -24.34 | -0.005257 | -0.006272 | -0.008515 | -0.009142 | -0.002741 | -0.003414 | -0.004235 | -0.004815 |
| -24.24 | -0.005263 | -0.006268 | -0.008488 | -0.009177 | -0.002744 | -0.003412 | -0.004221 | -0.004834 |
| -24.14 | -0.005290 | -0.006300 | -0.008485 | -0.009175 | -0.002758 | -0.003429 | -0.004220 | -0.004833 |
| -24.04 | -0.005109 | -0.006071 | -0.008240 | -0.008877 | -0.002667 | -0.003309 | -0.004104 | -0.004682 |
| -23.94 | -0.005071 | -0.006069 | -0.008212 | -0.008831 | -0.002647 | -0.003308 | -0.004089 | -0.004657 |
| -23.84 | -0.005110 | -0.006055 | -0.008239 | -0.008821 | -0.002668 | -0.003300 | -0.004103 | -0.004652 |
| -23.74 | -0.005094 | -0.006047 | -0.008223 | -0.008860 | -0.002568 | -0.003183 | -0.003955 | -0.004513 |
| -23.64 | -0.005071 | -0.006074 | -0.008187 | -0.008872 | -0.002556 | -0.003197 | -0.003937 | -0.004519 |
| -23.54 | -0.005081 | -0.006087 | -0.008207 | -0.008850 | -0.002562 | -0.003204 | -0.003947 | -0.004508 |
| -23.44 | -0.005110 | -0.006062 | -0.008240 | -0.008865 | -0.002485 | -0.003077 | -0.003822 | -0.004355 |
| -23.34 | -0.004956 | -0.005884 | -0.008007 | -0.008560 | -0.002483 | -0.003078 | -0.003827 | -0.004334 |
| -23.24 | -0.004927 | -0.005861 | -0.008001 | -0.008569 | -0.002378 | -0.002954 | -0.003684 | -0.004178 |
| -23.14 | -0.004926 | -0.005865 | -0.007985 | -0.008609 | -0.002378 | -0.002956 | -0.003677 | -0.004198 |
| -23.04 | -0.004806 | -0.005690 | -0.007734 | -0.008309 | -0.002301 | -0.002845 | -0.003533 | -0.004020 |
| -22.94 | -0.004781 | -0.005706 | -0.007759 | -0.008337 | -0.002289 | -0.002852 | -0.003544 | -0.004033 |
| -22.84 | -0.004798 | -0.005706 | -0.007758 | -0.008298 | -0.002298 | -0.002853 | -0.003544 | -0.004015 |
| -22.74 | -0.004786 | -0.005690 | -0.007723 | -0.008329 | -0.002292 | -0.002844 | -0.003528 | -0.004029 |
| -22.64 | -0.004631 | -0.005534 | -0.007474 | -0.008045 | -0.002290 | -0.002856 | -0.003525 | -0.004019 |
| -22.54 | -0.004627 | -0.005500 | -0.007494 | -0.008071 | -0.002179 | -0.002704 | -0.003366 | -0.003839 |
| -22.44 | -0.004632 | -0.005534 | -0.007517 | -0.008029 | -0.002181 | -0.002721 | -0.003376 | -0.003819 |
| -22.34 | -0.004635 | -0.005500 | -0.007513 | -0.008065 | -0.002182 | -0.002704 | -0.003374 | -0.003837 |
| -22.24 | -0.004467 | -0.005342 | -0.007271 | -0.007777 | -0.002174 | -0.002714 | -0.003376 | -0.003823 |
| -22.14 | -0.004474 | -0.005367 | -0.007256 | -0.007816 | -0.002177 | -0.002727 | -0.003369 | -0.003843 |
| -22.04 | -0.004328 | -0.005159 | -0.006988 | -0.007552 | -0.002088 | -0.002599 | -0.003217 | -0.003682 |
| -21.94 | -0.004326 | -0.005183 | -0.007002 | -0.007540 | -0.002088 | -0.002611 | -0.003223 | -0.003676 |
| -21.84 | -0.004336 | -0.005182 | -0.007029 | -0.007529 | -0.002002 | -0.002497 | -0.003095 | -0.003511 |
| -21.74 | -0.004350 | -0.005183 | -0.006974 | -0.007524 | -0.002008 | -0.002498 | -0.003071 | -0.003509 |
| -21.64 | -0.004339 | -0.005186 | -0.006973 | -0.007556 | -0.002003 | -0.002499 | -0.003070 | -0.003524 |
| -21.54 | -0.004187 | -0.005005 | -0.006750 | -0.007275 | -0.002002 | -0.002499 | -0.003079 | -0.003515 |
| -21.44 | -0.004172 | -0.004988 | -0.006784 | -0.007274 | -0.001995 | -0.002490 | -0.003095 | -0.003514 |
| -21.34 | -0.004200 | -0.005008 | -0.006755 | -0.007285 | -0.002008 | -0.002500 | -0.003081 | -0.003520 |
| -21.24 | -0.004203 | -0.004997 | -0.006756 | -0.007262 | -0.002010 | -0.002495 | -0.003082 | -0.003508 |
| -21.14 | -0.004030 | -0.004815 | -0.006526 | -0.006990 | -0.001908 | -0.002380 | -0.002948 | -0.003344 |
| -21.04 | -0.004024 | -0.004790 | -0.006495 | -0.006991 | -0.001905 | -0.002368 | -0.002934 | -0.003344 |
| -20.94 | -0.004045 | -0.004818 | -0.006524 | -0.007009 | -0.001915 | -0.002382 | -0.002947 | -0.003353 |
| -20.84 | -0.004050 | -0.004823 | -0.006525 | -0.007014 | -0.001826 | -0.002271 | -0.002807 | -0.003195 |
| -20.74 | -0.004029 | -0.004803 | -0.006502 | -0.006981 | -0.001817 | -0.002261 | -0.002797 | -0.003180 |
| -20.64 | -0.003868 | -0.004642 | -0.006283 | -0.006772 | -0.001812 | -0.002270 | -0.002808 | -0.003205 |
| -20.54 | -0.003867 | -0.004630 | -0.006279 | -0.006722 | -0.001811 | -0.002264 | -0.002806 | -0.003181 |
| -20.44 | -0.003895 | -0.004611 | -0.006279 | -0.006756 | -0.001825 | -0.002255 | -0.002806 | -0.003197 |
| -20.34 | -0.003874 | -0.004633 | -0.006281 | -0.006742 | -0.001724 | -0.002153 | -0.002666 | -0.003031 |
| -20.24 | -0.003708 | -0.004423 | -0.005991 | -0.006423 | -0.001730 | -0.002155 | -0.002667 | -0.003029 |
| -20.14 | -0.003562 | -0.004251 | -0.005760 | -0.006155 | -0.001824 | -0.002273 | -0.002814 | -0.003184 |
| -20.04 | -0.003558 | -0.004222 | -0.005744 | -0.006148 | -0.001822 | -0.002257 | -0.002806 | -0.003181 |
| -19.94 | -0.003547 | -0.004226 | -0.005733 | -0.006148 | -0.001726 | -0.002146 | -0.002661 | -0.003022 |
| -19.84 | -0.003407 | -0.004068 | -0.005502 | -0.005911 | -0.001731 | -0.002158 | -0.002667 | -0.003034 |
| -19.74 | -0.003416 | -0.004052 | -0.005509 | -0.005887 | -0.001735 | -0.002149 | -0.002669 | -0.003021 |
| -19.64 | -0.003391 | -0.004043 | -0.005483 | -0.005897 | -0.001722 | -0.002145 | -0.002657 | -0.003027 |
| -19.54 | -0.003245 | -0.003881 | -0.005260 | -0.005635 | -0.001725 | -0.002154 | -0.002667 | -0.003026 |
| -19.44 | -0.003253 | -0.003869 | -0.005242 | -0.005654 | -0.001729 | -0.002147 | -0.002658 | -0.003036 |
| -19.34 | -0.003097 | -0.003679 | -0.005018 | -0.005389 | -0.001635 | -0.002028 | -0.002527 | -0.002875 |
| -19.24 | -0.003095 | -0.003698 | -0.005024 | -0.005391 | -0.001634 | -0.002038 | -0.002530 | -0.002876 |
| -19.14 | -0.002945 | -0.003513 | -0.004782 | -0.005136 | -0.001634 | -0.002035 | -0.002531 | -0.002880 |
| -19.04 | -0.002949 | -0.003516 | -0.004756 | -0.005111 | -0.001637 | -0.002037 | -0.002518 | -0.002866 |
| -18.94 | -0.002957 | -0.003509 | -0.004773 | -0.005123 | -0.001550 | -0.001920 | -0.002387 | -0.002713 |
| -18.84 | -0.002805 | -0.003323 | -0.004513 | -0.004883 | -0.001549 | -0.001916 | -0.002378 | -0.002724 |
| -18.74 | -0.002808 | -0.003349 | -0.004534 | -0.004865 | -0.001551 | -0.001931 | -0.002389 | -0.002714 |
| -18.64 | -0.002640 | -0.003164 | -0.004287 | -0.004600 | -0.001450 | -0.001815 | -0.002246 | -0.002553 |
| -18.54 | -0.002644 | -0.003153 | -0.004299 | -0.004616 | -0.001452 | -0.001808 | -0.002253 | -0.002562 |
| -18.44 | -0.002660 | -0.003154 | -0.004295 | -0.004619 | -0.001351 | -0.001673 | -0.002082 | -0.002371 |
| -18.34 | -0.002658 | -0.003159 | -0.004292 | -0.004596 | -0.001351 | -0.001676 | -0.002080 | -0.002360 |
| -18.24 | -0.002479 | -0.002933 | -0.004002 | -0.004308 | -0.001352 | -0.001670 | -0.002082 | -0.002373 |
| -18.14 | -0.002470 | -0.002949 | -0.003986 | -0.004300 | -0.001347 | -0.001679 | -0.002073 | -0.002369 |
| -18.04 | -0.002314 | -0.002762 | -0.003753 | -0.004013 | -0.001344 | -0.001674 | -0.002079 | -0.002354 |
| -17.94 | -0.002318 | -0.002763 | -0.003752 | -0.004044 | -0.001255 | -0.001562 | -0.001938 | -0.002212 |
| -17.84 | -0.002163 | -0.002580 | -0.003512 | -0.003782 | -0.001253 | -0.001560 | -0.001940 | -0.002213 |
| -17.74 | -0.002167 | -0.002593 | -0.003517 | -0.003765 | -0.001255 | -0.001567 | -0.001943 | -0.002203 |
| -17.64 | -0.002174 | -0.002582 | -0.003513 | -0.003765 | -0.001168 | -0.001448 | -0.001800 | -0.002043 |
| -17.54 | -0.002010 | -0.002412 | -0.003263 | -0.003491 | -0.001160 | -0.001453 | -0.001797 | -0.002036 |
| -17.44 | -0.002023 | -0.002397 | -0.003253 | -0.003520 | -0.001168 | -0.001445 | -0.001791 | -0.002052 |
| -17.34 | -0.002016 | -0.002404 | -0.003271 | -0.003505 | -0.001164 | -0.001449 | -0.001801 | -0.002044 |
| -17.24 | -0.001860 | -0.002217 | -0.003023 | -0.003240 | -0.001070 | -0.001331 | -0.001658 | -0.001882 |
| -17.14 | -0.001871 | -0.002231 | -0.003006 | -0.003258 | -0.001076 | -0.001339 | -0.001649 | -0.001893 |
| -17.04 | -0.001713 | -0.002049 | -0.002772 | -0.002986 | -0.001071 | -0.001338 | -0.001654 | -0.001887 |
| -16.94 | -0.001717 | -0.002045 | -0.002780 | -0.002972 | -0.001074 | -0.001335 | -0.001659 | -0.001878 |
| -16.84 | -0.001721 | -0.002045 | -0.002769 | -0.002988 | -0.000985 | -0.001222 | -0.001512 | -0.001728 |
| -16.74 | -0.001718 | -0.002041 | -0.002777 | -0.002988 | -0.000984 | -0.001220 | -0.001516 | -0.001728 |
| -16.64 | -0.001715 | -0.002047 | -0.002785 | -0.002971 | -0.000982 | -0.001224 | -0.001521 | -0.001718 |
| -16.54 | -0.001872 | -0.002223 | -0.003011 | -0.003238 | -0.000894 | -0.001109 | -0.001372 | -0.001562 |
| -16.44 | -0.001714 | -0.002041 | -0.002782 | -0.002986 | -0.000890 | -0.001107 | -0.001379 | -0.001567 |
| -16.34 | -0.001567 | -0.001872 | -0.002518 | -0.002717 | -0.000892 | -0.001113 | -0.001368 | -0.001563 |
| -16.24 | -0.001566 | -0.001872 | -0.002524 | -0.002712 | -0.000892 | -0.001113 | -0.001371 | -0.001560 |
| -16.14 | -0.001417 | -0.001680 | -0.002292 | -0.002451 | -0.000893 | -0.001105 | -0.001378 | -0.001560 |
| -16.04 | -0.001416 | -0.001687 | -0.002281 | -0.002454 | -0.000801 | -0.000996 | -0.001231 | -0.001402 |
| -15.94 | -0.001239 | -0.001469 | -0.001994 | -0.002138 | -0.000712 | -0.000882 | -0.001093 | -0.001242 |
| -15.84 | -0.001237 | -0.001469 | -0.002001 | -0.002147 | -0.000802 | -0.000995 | -0.001238 | -0.001406 |
| -15.74 | -0.001236 | -0.001470 | -0.001996 | -0.002153 | -0.000710 | -0.000882 | -0.001095 | -0.001250 |
| -15.64 | -0.001081 | -0.001290 | -0.001754 | -0.001876 | -0.000708 | -0.000882 | -0.001095 | -0.001241 |
| -15.54 | -0.001087 | -0.001286 | -0.001752 | -0.001885 | -0.000712 | -0.000879 | -0.001094 | -0.001247 |
| -15.44 | -0.001082 | -0.001286 | -0.001753 | -0.001885 | -0.000708 | -0.000879 | -0.001094 | -0.001247 |
| -15.34 | -0.000936 | -0.001112 | -0.001506 | -0.001620 | -0.000602 | -0.000747 | -0.000924 | -0.001053 |
| -15.24 | -0.000934 | -0.001111 | -0.001509 | -0.001623 | -0.000601 | -0.000746 | -0.000926 | -0.001055 |
| -15.14 | -0.000784 | -0.000935 | -0.001265 | -0.001358 | -0.000602 | -0.000749 | -0.000925 | -0.001052 |
| -15.04 | -0.000783 | -0.000930 | -0.001260 | -0.001364 | -0.000510 | -0.000632 | -0.000782 | -0.000897 |
| -14.94 | -0.000780 | -0.000931 | -0.001268 | -0.001363 | -0.000508 | -0.000633 | -0.000787 | -0.000896 |
| -14.84 | -0.000635 | -0.000750 | -0.001017 | -0.001099 | -0.000511 | -0.000631 | -0.000782 | -0.000895 |
| -14.74 | -0.000630 | -0.000752 | -0.001019 | -0.001102 | -0.000417 | -0.000519 | -0.000643 | -0.000737 |
| -14.64 | -0.000480 | -0.000576 | -0.000780 | -0.000836 | -0.000417 | -0.000522 | -0.000646 | -0.000734 |
| -14.54 | -0.000482 | -0.000572 | -0.000776 | -0.000836 | -0.000328 | -0.000406 | -0.000503 | -0.000574 |
| -14.44 | -0.000483 | -0.000573 | -0.000781 | -0.000836 | -0.000328 | -0.000407 | -0.000506 | -0.000574 |
| -14.34 | -0.000332 | -0.000395 | -0.000534 | -0.000574 | -0.000328 | -0.000407 | -0.000504 | -0.000573 |
| -14.24 | -0.000332 | -0.000395 | -0.000536 | -0.000575 | -0.000237 | -0.000294 | -0.000365 | -0.000415 |
| -14.14 | -0.000331 | -0.000394 | -0.000534 | -0.000573 | -0.000236 | -0.000294 | -0.000364 | -0.000414 |
| -14.04 | -0.000332 | -0.000394 | -0.000536 | -0.000574 | -0.000237 | -0.000294 | -0.000365 | -0.000414 |
| -13.94 | -0.000330 | -0.000393 | -0.000536 | -0.000578 | -0.000236 | -0.000293 | -0.000365 | -0.000417 |
| -13.84 | -0.000331 | -0.000395 | -0.000535 | -0.000575 | -0.000145 | -0.000181 | -0.000224 | -0.000255 |
| -13.74 | -0.000331 | -0.000394 | -0.000537 | -0.000574 | -0.000146 | -0.000181 | -0.000225 | -0.000255 |
| -13.64 | -0.000331 | -0.000396 | -0.000536 | -0.000574 | -0.000145 | -0.000182 | -0.000225 | -0.000255 |
| -13.54 | -0.000330 | -0.000393 | -0.000537 | -0.000576 | -0.000054 | -0.000068 | -0.000084 | -0.000096 |
| -13.44 | -0.000331 | -0.000394 | -0.000537 | -0.000577 | -0.000055 | -0.000068 | -0.000084 | -0.000096 |
| -13.34 | -0.000333 | -0.000394 | -0.000533 | -0.000575 | -0.000055 | -0.000068 | -0.000084 | -0.000096 |
| -13.24 | -0.000332 | -0.000395 | -0.000537 | -0.000577 | 0.000036 | 0.000045 | 0.000056 | 0.000064 |
| -13.14 | -0.000331 | -0.000396 | -0.000536 | -0.000573 | 0.000036 | 0.000045 | 0.000056 | 0.000064 |
| -13.04 | -0.000180 | -0.000215 | -0.000292 | -0.000315 | 0.000036 | 0.000045 | 0.000056 | 0.000064 |
| -12.94 | -0.000330 | -0.000394 | -0.000534 | -0.000575 | 0.000036 | 0.000045 | 0.000056 | 0.000064 |
| -12.84 | -0.000181 | -0.000215 | -0.000293 | -0.000313 | 0.000037 | 0.000045 | 0.000056 | 0.000064 |
| -12.74 | -0.000332 | -0.000394 | -0.000537 | -0.000576 | 0.000036 | 0.000045 | 0.000056 | 0.000064 |
| -12.64 | -0.000180 | -0.000215 | -0.000291 | -0.000315 | 0.000145 | 0.000181 | 0.000224 | 0.000256 |
| -12.54 | -0.000330 | -0.000393 | -0.000534 | -0.000575 | 0.000145 | 0.000180 | 0.000224 | 0.000255 |
| -12.44 | -0.000330 | -0.000395 | -0.000537 | -0.000573 | 0.000145 | 0.000181 | 0.000225 | 0.000254 |
| -12.34 | -0.000331 | -0.000396 | -0.000535 | -0.000575 | 0.000145 | 0.000182 | 0.000224 | 0.000255 |
| -12.24 | -0.000180 | -0.000215 | -0.000292 | -0.000315 | 0.000145 | 0.000181 | 0.000224 | 0.000257 |
| -12.14 | -0.000181 | -0.000216 | -0.000293 | -0.000314 | 0.000146 | 0.000182 | 0.000225 | 0.000255 |
| -12.04 | -0.000333 | -0.000394 | -0.000535 | -0.000574 | 0.000037 | 0.000045 | 0.000056 | 0.000064 |
| -11.94 | -0.000331 | -0.000396 | -0.000534 | -0.000573 | 0.000036 | 0.000045 | 0.000056 | 0.000064 |
| -11.84 | -0.000331 | -0.000394 | -0.000535 | -0.000574 | 0.000145 | 0.000181 | 0.000224 | 0.000255 |
| -11.74 | -0.000331 | -0.000395 | -0.000536 | -0.000575 | 0.000146 | 0.000181 | 0.000225 | 0.000255 |
| -11.64 | -0.000332 | -0.000394 | -0.000533 | -0.000576 | 0.000146 | 0.000181 | 0.000223 | 0.000256 |
| -11.54 | -0.000330 | -0.000393 | -0.000537 | -0.000576 | 0.000145 | 0.000180 | 0.000225 | 0.000256 |
| -11.44 | -0.000181 | -0.000216 | -0.000291 | -0.000313 | 0.000146 | 0.000181 | 0.000223 | 0.000255 |
| -11.34 | -0.000181 | -0.000215 | -0.000291 | -0.000315 | 0.000146 | 0.000181 | 0.000224 | 0.000256 |
| -11.24 | -0.000181 | -0.000215 | -0.000293 | -0.000314 | 0.000146 | 0.000181 | 0.000225 | 0.000256 |
| -11.14 | -0.000030 | -0.000036 | -0.000049 | -0.000052 | 0.000145 | 0.000181 | 0.000225 | 0.000255 |
| -11.04 | -0.000030 | -0.000036 | -0.000048 | -0.000052 | 0.000145 | 0.000181 | 0.000224 | 0.000255 |
| -10.94 | -0.000030 | -0.000036 | -0.000048 | -0.000052 | 0.000145 | 0.000182 | 0.000224 | 0.000256 |
| -10.84 | -0.000030 | -0.000036 | -0.000049 | -0.000052 | 0.000237 | 0.000295 | 0.000366 | 0.000415 |
| -10.74 | -0.000030 | -0.000036 | -0.000048 | -0.000052 | 0.000237 | 0.000295 | 0.000363 | 0.000415 |
| -10.64 | -0.000030 | -0.000036 | -0.000049 | -0.000052 | 0.000237 | 0.000294 | 0.000366 | 0.000416 |
| -10.54 | -0.000030 | -0.000036 | -0.000049 | -0.000052 | 0.000236 | 0.000295 | 0.000364 | 0.000414 |
| -10.44 | -0.000030 | -0.000036 | -0.000049 | -0.000052 | 0.000237 | 0.000294 | 0.000364 | 0.000416 |
| -10.34 | -0.000030 | -0.000036 | -0.000049 | -0.000052 | 0.000236 | 0.000294 | 0.000366 | 0.000414 |
| -10.24 | -0.000030 | -0.000036 | -0.000049 | -0.000052 | 0.000237 | 0.000293 | 0.000365 | 0.000416 |
| -10.14 | -0.000030 | -0.000036 | -0.000049 | -0.000052 | 0.000236 | 0.000294 | 0.000366 | 0.000414 |
| -10.04 | -0.000030 | -0.000036 | -0.000048 | -0.000052 | 0.000237 | 0.000295 | 0.000363 | 0.000416 |
| -9.94 | -0.000030 | -0.000036 | -0.000048 | -0.000052 | 0.000236 | 0.000295 | 0.000364 | 0.000415 |
| -9.84 | -0.000030 | -0.000036 | -0.000049 | -0.000052 | 0.000236 | 0.000293 | 0.000365 | 0.000414 |
| -9.74 | 0.000151 | 0.000180 | 0.000242 | 0.000261 | 0.000237 | 0.000295 | 0.000363 | 0.000414 |
| -9.64 | 0.000151 | 0.000179 | 0.000244 | 0.000262 | 0.000237 | 0.000293 | 0.000365 | 0.000416 |
| -9.54 | 0.000150 | 0.000179 | 0.000243 | 0.000262 | 0.000236 | 0.000293 | 0.000364 | 0.000416 |
| -9.44 | 0.000150 | 0.000179 | 0.000243 | 0.000262 | 0.000236 | 0.000294 | 0.000364 | 0.000415 |
| -9.34 | 0.000150 | 0.000179 | 0.000244 | 0.000262 | 0.000236 | 0.000293 | 0.000366 | 0.000416 |
| -9.24 | 0.000150 | 0.000180 | 0.000243 | 0.000261 | 0.000145 | 0.000182 | 0.000224 | 0.000254 |
| -9.14 | 0.000151 | 0.000180 | 0.000243 | 0.000263 | 0.000237 | 0.000295 | 0.000365 | 0.000417 |
| -9.04 | 0.000151 | 0.000179 | 0.000244 | 0.000263 | 0.000237 | 0.000294 | 0.000365 | 0.000417 |
| -8.94 | 0.000151 | 0.000180 | 0.000243 | 0.000262 | 0.000146 | 0.000182 | 0.000224 | 0.000255 |
| -8.84 | 0.000151 | 0.000179 | 0.000244 | 0.000261 | 0.000146 | 0.000180 | 0.000225 | 0.000254 |
| -8.74 | 0.000151 | 0.000180 | 0.000244 | 0.000261 | 0.000146 | 0.000181 | 0.000225 | 0.000255 |
| -8.64 | 0.000151 | 0.000180 | 0.000244 | 0.000261 | 0.000146 | 0.000181 | 0.000225 | 0.000255 |
| -8.54 | 0.000151 | 0.000180 | 0.000243 | 0.000262 | 0.000146 | 0.000182 | 0.000224 | 0.000256 |
| -8.44 | 0.000150 | 0.000179 | 0.000244 | 0.000262 | 0.000145 | 0.000181 | 0.000225 | 0.000255 |
| -8.34 | 0.000151 | 0.000179 | 0.000243 | 0.000261 | 0.000146 | 0.000181 | 0.000224 | 0.000255 |
| -8.24 | 0.000150 | 0.000180 | 0.000243 | 0.000261 | 0.000145 | 0.000181 | 0.000224 | 0.000255 |
| -8.14 | 0.000151 | 0.000180 | 0.000244 | 0.000261 | 0.000146 | 0.000181 | 0.000225 | 0.000255 |
| -8.04 | 0.000151 | 0.000180 | 0.000243 | 0.000262 | 0.000146 | 0.000182 | 0.000224 | 0.000256 |
| -7.94 | 0.000151 | 0.000179 | 0.000244 | 0.000263 | 0.000146 | 0.000181 | 0.000225 | 0.000257 |
| -7.84 | 0.000150 | 0.000180 | 0.000243 | 0.000262 | 0.000145 | 0.000182 | 0.000224 | 0.000256 |
| -7.74 | 0.000150 | 0.000179 | 0.000243 | 0.000262 | 0.000036 | 0.000045 | 0.000056 | 0.000064 |
| -7.64 | 0.000150 | 0.000179 | 0.000243 | 0.000262 | 0.000036 | 0.000045 | 0.000056 | 0.000064 |
| -7.54 | 0.000151 | 0.000180 | 0.000243 | 0.000261 | 0.000036 | 0.000045 | 0.000056 | 0.000064 |
| -7.44 | 0.000150 | 0.000180 | 0.000243 | 0.000262 | 0.000036 | 0.000045 | 0.000056 | 0.000064 |
| -7.34 | 0.000151 | 0.000180 | 0.000242 | 0.000262 | -0.000055 | -0.000068 | -0.000084 | -0.000096 |
| -7.24 | 0.000151 | 0.000180 | 0.000243 | 0.000263 | 0.000036 | 0.000045 | 0.000056 | 0.000064 |
| -7.14 | 0.000151 | 0.000180 | 0.000244 | 0.000263 | -0.000055 | -0.000068 | -0.000084 | -0.000096 |
| -7.04 | 0.000150 | 0.000180 | 0.000243 | 0.000262 | -0.000054 | -0.000068 | -0.000084 | -0.000096 |
| -6.94 | 0.000150 | 0.000180 | 0.000242 | 0.000261 | -0.000054 | -0.000068 | -0.000084 | -0.000095 |
| -6.84 | 0.000151 | 0.000179 | 0.000244 | 0.000261 | -0.000055 | -0.000068 | -0.000084 | -0.000096 |
| -6.74 | 0.000300 | 0.000359 | 0.000486 | 0.000521 | -0.000054 | -0.000068 | -0.000084 | -0.000095 |
| -6.64 | 0.000301 | 0.000359 | 0.000487 | 0.000522 | -0.000055 | -0.000068 | -0.000084 | -0.000096 |
| -6.54 | 0.000302 | 0.000357 | 0.000485 | 0.000525 | -0.000146 | -0.000180 | -0.000223 | -0.000257 |
| -6.44 | 0.000301 | 0.000358 | 0.000484 | 0.000521 | -0.000146 | -0.000180 | -0.000223 | -0.000255 |
| -6.34 | 0.000301 | 0.000359 | 0.000485 | 0.000525 | -0.000146 | -0.000181 | -0.000224 | -0.000257 |
| -6.24 | 0.000300 | 0.000360 | 0.000485 | 0.000522 | -0.000145 | -0.000182 | -0.000224 | -0.000255 |
| -6.14 | 0.000302 | 0.000360 | 0.000488 | 0.000523 | -0.000146 | -0.000181 | -0.000225 | -0.000256 |
| -6.04 | 0.000453 | 0.000538 | 0.000730 | 0.000783 | -0.000146 | -0.000181 | -0.000225 | -0.000255 |
| -5.94 | 0.000452 | 0.000539 | 0.000733 | 0.000784 | -0.000146 | -0.000181 | -0.000225 | -0.000255 |
| -5.84 | 0.000452 | 0.000536 | 0.000730 | 0.000788 | -0.000237 | -0.000293 | -0.000365 | -0.000417 |
| -5.74 | 0.000450 | 0.000539 | 0.000731 | 0.000783 | -0.000236 | -0.000295 | -0.000365 | -0.000414 |
| -5.64 | 0.000451 | 0.000538 | 0.000730 | 0.000782 | -0.000236 | -0.000294 | -0.000365 | -0.000414 |
| -5.54 | 0.000451 | 0.000537 | 0.000728 | 0.000786 | -0.000236 | -0.000293 | -0.000364 | -0.000416 |
| -5.44 | 0.000452 | 0.000538 | 0.000733 | 0.000786 | -0.000237 | -0.000294 | -0.000366 | -0.000416 |
| -5.34 | 0.000301 | 0.000357 | 0.000485 | 0.000522 | -0.000236 | -0.000293 | -0.000363 | -0.000415 |
| -5.24 | 0.000300 | 0.000358 | 0.000488 | 0.000524 | -0.000236 | -0.000294 | -0.000366 | -0.000416 |
| -5.14 | 0.000451 | 0.000537 | 0.000726 | 0.000784 | -0.000236 | -0.000294 | -0.000363 | -0.000415 |
| -5.04 | 0.000450 | 0.000537 | 0.000730 | 0.000786 | -0.000236 | -0.000294 | -0.000364 | -0.000416 |
| -4.94 | 0.000603 | 0.000718 | 0.000970 | 0.001043 | -0.000237 | -0.000294 | -0.000364 | -0.000414 |
| -4.84 | 0.000604 | 0.000716 | 0.000970 | 0.001043 | -0.000237 | -0.000293 | -0.000364 | -0.000414 |
| -4.74 | 0.000604 | 0.000719 | 0.000973 | 0.001044 | -0.000328 | -0.000408 | -0.000505 | -0.000574 |
| -4.64 | 0.000601 | 0.000717 | 0.000969 | 0.001050 | -0.000327 | -0.000407 | -0.000503 | -0.000577 |
| -4.54 | 0.000600 | 0.000717 | 0.000973 | 0.001042 | -0.000326 | -0.000407 | -0.000505 | -0.000573 |
| -4.44 | 0.000601 | 0.000716 | 0.000973 | 0.001049 | -0.000327 | -0.000407 | -0.000505 | -0.000577 |
| -4.34 | 0.000604 | 0.000717 | 0.000972 | 0.001047 | -0.000328 | -0.000407 | -0.000504 | -0.000575 |
| -4.24 | 0.000602 | 0.000714 | 0.000974 | 0.001042 | -0.000327 | -0.000406 | -0.000505 | -0.000573 |
| -4.14 | 0.000602 | 0.000716 | 0.000977 | 0.001042 | -0.000419 | -0.000519 | -0.000647 | -0.000731 |
| -4.04 | 0.000601 | 0.000719 | 0.000974 | 0.001050 | -0.000418 | -0.000522 | -0.000645 | -0.000737 |
| -3.94 | 0.000450 | 0.000537 | 0.000726 | 0.000785 | -0.000417 | -0.000520 | -0.000642 | -0.000735 |
| -3.84 | 0.000451 | 0.000536 | 0.000732 | 0.000785 | -0.000418 | -0.000519 | -0.000647 | -0.000735 |
| -3.74 | 0.000452 | 0.000537 | 0.000728 | 0.000783 | -0.000510 | -0.000632 | -0.000783 | -0.000892 |
| -3.64 | 0.000451 | 0.000539 | 0.000728 | 0.000787 | -0.000509 | -0.000635 | -0.000783 | -0.000897 |
| -3.54 | 0.000451 | 0.000540 | 0.000728 | 0.000785 | -0.000508 | -0.000636 | -0.000784 | -0.000895 |
| -3.44 | 0.000300 | 0.000359 | 0.000486 | 0.000525 | -0.000507 | -0.000635 | -0.000784 | -0.000897 |
| -3.34 | 0.000301 | 0.000360 | 0.000488 | 0.000523 | -0.000509 | -0.000636 | -0.000787 | -0.000893 |
| -3.24 | 0.000151 | 0.000179 | 0.000244 | 0.000263 | -0.000601 | -0.000746 | -0.000926 | -0.001058 |
| -3.14 | 0.000151 | 0.000180 | 0.000243 | 0.000261 | -0.000603 | -0.000750 | -0.000924 | -0.001053 |
| -3.04 | 0.000151 | 0.000179 | 0.000244 | 0.000262 | -0.000602 | -0.000746 | -0.000929 | -0.001054 |
| -2.94 | 0.000150 | 0.000180 | 0.000244 | 0.000262 | -0.000599 | -0.000747 | -0.000926 | -0.001054 |
| -2.84 | 0.000150 | 0.000179 | 0.000242 | 0.000263 | -0.000598 | -0.000745 | -0.000922 | -0.001058 |
| -2.74 | 0.000151 | 0.000180 | 0.000244 | 0.000261 | -0.000602 | -0.000748 | -0.000928 | -0.001050 |
| -2.64 | -0.000030 | -0.000036 | -0.000049 | -0.000052 | -0.000600 | -0.000747 | -0.000929 | -0.001057 |
| -2.54 | -0.000030 | -0.000036 | -0.000049 | -0.000052 | -0.000603 | -0.000747 | -0.000928 | -0.001054 |
| -2.44 | 0.000151 | 0.000180 | 0.000243 | 0.000261 | -0.000603 | -0.000750 | -0.000923 | -0.001052 |
| -2.34 | 0.000151 | 0.000180 | 0.000244 | 0.000261 | -0.000601 | -0.000748 | -0.000928 | -0.001052 |
| -2.24 | 0.000150 | 0.000179 | 0.000243 | 0.000261 | -0.000599 | -0.000746 | -0.000923 | -0.001051 |
| -2.14 | 0.000150 | 0.000179 | 0.000242 | 0.000262 | -0.000508 | -0.000634 | -0.000782 | -0.000896 |
| -2.04 | 0.000151 | 0.000179 | 0.000243 | 0.000262 | -0.000510 | -0.000631 | -0.000785 | -0.000894 |
| -1.94 | -0.000030 | -0.000036 | -0.000049 | -0.000052 | -0.000509 | -0.000633 | -0.000786 | -0.000894 |
| -1.84 | -0.000030 | -0.000036 | -0.000049 | -0.000052 | -0.000417 | -0.000519 | -0.000647 | -0.000735 |
| -1.74 | -0.000181 | -0.000215 | -0.000292 | -0.000313 | -0.000511 | -0.000632 | -0.000785 | -0.000892 |
| -1.64 | -0.000180 | -0.000214 | -0.000292 | -0.000314 | -0.000418 | -0.000519 | -0.000646 | -0.000735 |
| -1.54 | -0.000181 | -0.000215 | -0.000292 | -0.000315 | -0.000710 | -0.000884 | -0.001095 | -0.001249 |
| -1.44 | -0.000331 | -0.000394 | -0.000533 | -0.000574 | -0.001457 | -0.001809 | -0.002236 | -0.002549 |
| -1.34 | -0.000481 | -0.000576 | -0.000780 | -0.000834 | -0.002088 | -0.002613 | -0.003231 | -0.003662 |
| -1.24 | -0.000782 | -0.000930 | -0.001270 | -0.001356 | -0.002743 | -0.003408 | -0.004251 | -0.004808 |
| -1.14 | -0.001238 | -0.001474 | -0.002000 | -0.002137 | -0.003594 | -0.004468 | -0.005541 | -0.006269 |
| -1.04 | -0.001717 | -0.002040 | -0.002763 | -0.002982 | -0.004059 | -0.005034 | -0.006230 | -0.007122 |
| -0.940002 | -0.001868 | -0.002218 | -0.003017 | -0.003254 | -0.004514 | -0.005596 | -0.006956 | -0.007945 |
| -0.84 | -0.001867 | -0.002218 | -0.003009 | -0.003231 | -0.004985 | -0.006184 | -0.007665 | -0.008717 |
| -0.740002 | -0.001871 | -0.002222 | -0.003024 | -0.003252 | -0.005269 | -0.006535 | -0.008124 | -0.009254 |
| -0.640003 | -0.001565 | -0.001863 | -0.002536 | -0.002716 | -0.004802 | -0.005968 | -0.007421 | -0.008418 |
| -0.540001 | -0.001088 | -0.001288 | -0.001757 | -0.001883 | -0.003505 | -0.004333 | -0.005402 | -0.006129 |
| -0.440002 | 0.000751 | 0.000900 | 0.001212 | 0.001309 | -0.002741 | -0.003430 | -0.004219 | -0.004826 |
| -0.34 | 0.001994 | 0.002361 | 0.003213 | 0.003455 | -0.001460 | -0.001806 | -0.002245 | -0.002557 |
| -0.240002 | 0.003364 | 0.004013 | 0.005457 | 0.005886 | -0.000508 | -0.000633 | -0.000786 | -0.000898 |
| -0.140003 | 0.005989 | 0.007127 | 0.009709 | 0.010396 | 0.000782 | 0.000971 | 0.001209 | 0.001371 |
| -0.0400009 | 0.008313 | 0.009903 | 0.013449 | 0.014432 | 0.002566 | 0.003192 | 0.003960 | 0.004501 |
| 0.0599976 | 0.008438 | 0.010040 | 0.013715 | 0.014644 | 0.002558 | 0.003178 | 0.003967 | 0.004486 |
| 0.16 | 0.006925 | 0.008249 | 0.011224 | 0.012077 | 0.003311 | 0.004118 | 0.005120 | 0.005834 |
| 0.259998 | 0.018243 | 0.021744 | 0.029453 | 0.031570 | 0.006023 | 0.007495 | 0.009276 | 0.010530 |
| 0.359997 | 0.554710 | 0.664755 | 0.900772 | 0.964273 | 0.245260 | 0.306865 | 0.379928 | 0.430744 |
| 0.459999 | 1.913818 | 2.283378 | 3.076291 | 3.324011 | 2.261496 | 2.817078 | 3.467755 | 3.968413 |
| 0.559998 | 2.881228 | 3.407675 | 4.653353 | 4.993885 | 4.683705 | 5.783568 | 7.216118 | 8.201809 |
| 0.66 | 3.331271 | 3.979279 | 5.404357 | 5.774816 | 5.991770 | 7.472662 | 9.272886 | 10.494037 |
| 0.759998 | 3.602745 | 4.280139 | 5.823884 | 6.230472 | 6.720604 | 8.336015 | 10.363663 | 11.742348 |
| 0.859997 | 3.748999 | 4.469389 | 6.059169 | 6.523523 | 7.107357 | 8.846404 | 10.958009 | 12.494942 |
| 0.959999 | 3.882164 | 4.633427 | 6.268850 | 6.778836 | 7.429026 | 9.257337 | 11.443835 | 13.106066 |
| 1.06 | 4.004514 | 4.769613 | 6.471534 | 6.912524 | 7.713482 | 9.592009 | 11.891417 | 13.452299 |
| 1.16 | 4.083059 | 4.857009 | 6.595101 | 7.051958 | 7.906141 | 9.819144 | 12.182211 | 13.795832 |
| 1.26 | 4.120301 | 4.902513 | 6.653459 | 7.193361 | 7.999955 | 9.938095 | 12.323435 | 14.110736 |
| 1.36 | 4.175835 | 4.986945 | 6.730990 | 7.262748 | 8.130336 | 10.137377 | 12.501725 | 14.286485 |
| 1.46 | 4.192189 | 5.007498 | 6.771934 | 7.301000 | 8.184367 | 10.206830 | 12.611965 | 14.400774 |
| 1.56 | 4.243485 | 5.057339 | 6.864118 | 7.399268 | 8.294718 | 10.321121 | 12.799397 | 14.612582 |
| 1.66 | 4.255764 | 5.097375 | 6.887772 | 7.391980 | 8.332729 | 10.420344 | 12.865131 | 14.622772 |
| 1.76 | 4.273657 | 5.114850 | 6.921181 | 7.444568 | 8.372697 | 10.462234 | 12.935157 | 14.735486 |
| 1.86 | 4.294685 | 5.107592 | 6.908129 | 7.425443 | 8.428559 | 10.465597 | 12.933265 | 14.723248 |
| 1.96 | 4.300111 | 5.140960 | 6.926479 | 7.472478 | 8.446337 | 10.542869 | 12.978577 | 14.829028 |
| 2.06 | 4.315070 | 5.125622 | 6.939583 | 7.506883 | 8.480920 | 10.517864 | 13.011107 | 14.906442 |
| 2.16 | 4.323270 | 5.148569 | 6.958179 | 7.474231 | 8.500752 | 10.569570 | 13.051678 | 14.848095 |
| 2.26 | 4.297710 | 5.129362 | 6.960669 | 7.493028 | 8.454913 | 10.535648 | 13.063177 | 14.893221 |
| 2.36 | 4.319354 | 5.119133 | 6.987337 | 7.473217 | 8.501566 | 10.519677 | 13.119510 | 14.860964 |
| 2.46 | 4.331545 | 5.125947 | 6.939473 | 7.516676 | 8.527149 | 10.535640 | 13.032065 | 14.950168 |
| 2.56 | 4.332278 | 5.160283 | 6.953278 | 7.483396 | 8.529005 | 10.606726 | 13.058623 | 14.884698 |
| 2.66 | 4.336515 | 5.124310 | 6.971334 | 7.474441 | 8.538165 | 10.533796 | 13.093787 | 14.868310 |
| 2.76 | 4.331395 | 5.145191 | 6.979082 | 7.536165 | 8.529665 | 10.578680 | 13.110772 | 14.993873 |
| 2.86 | 4.317140 | 5.147056 | 7.011460 | 7.540879 | 8.502949 | 10.584203 | 13.173697 | 15.005644 |
| 2.96 | 4.310845 | 5.169397 | 6.985148 | 7.489759 | 8.488392 | 10.627442 | 13.120922 | 14.900131 |
| 3.06 | 4.310476 | 5.167475 | 6.953936 | 7.511022 | 8.486377 | 10.621877 | 13.060310 | 14.940162 |
| 3.16 | 4.315533 | 5.167285 | 6.999728 | 7.535571 | 8.496156 | 10.621265 | 13.146041 | 14.988682 |
| 3.26 | 4.334864 | 5.133794 | 6.998934 | 7.548357 | 8.533900 | 10.552038 | 13.144065 | 15.013562 |
| 3.36 | 4.317712 | 5.149710 | 6.993665 | 7.512870 | 8.499603 | 10.584091 | 13.133350 | 14.942047 |
| 3.46 | 4.319298 | 5.157959 | 7.002572 | 7.511450 | 8.501737 | 10.599815 | 13.148551 | 14.937486 |
| 3.56 | 4.329171 | 5.172572 | 6.964958 | 7.532111 | 8.521320 | 10.630029 | 13.078151 | 14.978835 |
| 3.66 | 4.315539 | 5.136174 | 7.002234 | 7.514314 | 8.494451 | 10.555182 | 13.148088 | 14.943378 |
| 3.76 | 4.324553 | 5.169311 | 6.997005 | 7.548184 | 8.511820 | 10.622817 | 13.137695 | 15.010078 |
| 3.86 | 4.330995 | 5.151104 | 7.004325 | 7.516668 | 8.524771 | 10.585738 | 13.151856 | 14.947879 |
| 3.96 | 4.312852 | 5.141048 | 6.988794 | 7.498352 | 8.489231 | 10.565284 | 13.122959 | 14.911758 |
| 4.06 | 4.322109 | 5.148177 | 6.977305 | 7.504908 | 8.506939 | 10.579297 | 13.100594 | 14.923894 |
| 4.16 | 4.320633 | 5.133104 | 6.969752 | 7.501108 | 8.504118 | 10.548428 | 13.086542 | 14.916485 |
| 4.26 | 4.333864 | 5.174651 | 6.971787 | 7.534939 | 8.530762 | 10.634558 | 13.091288 | 14.984819 |
| 4.36 | 4.319402 | 5.162426 | 7.012552 | 7.514352 | 8.502472 | 10.609652 | 13.168108 | 14.944188 |
| 4.46 | 4.321759 | 5.165314 | 6.990865 | 7.520333 | 8.506900 | 10.615327 | 13.127061 | 14.955713 |
| 4.56 | 4.323021 | 5.170672 | 6.966400 | 7.551835 | 8.509291 | 10.626222 | 13.080979 | 15.018197 |
| 4.66 | 4.311986 | 5.153351 | 7.017384 | 7.546194 | 8.487572 | 10.590625 | 13.176712 | 15.006978 |
| 4.76 | 4.329085 | 5.161080 | 6.988105 | 7.491988 | 8.520923 | 10.606132 | 13.121267 | 14.898649 |
| 4.86 | 4.332773 | 5.154910 | 7.003746 | 7.526013 | 8.528310 | 10.593608 | 13.150830 | 14.966535 |
| 4.96 | 4.336078 | 5.144531 | 7.001568 | 7.488373 | 8.534815 | 10.572281 | 13.146741 | 14.891682 |
| 5.06 | 4.321460 | 5.142930 | 7.015219 | 7.536762 | 8.506043 | 10.568989 | 13.172374 | 14.987910 |
| 5.16 | 4.320431 | 5.143756 | 6.993482 | 7.553376 | 8.504023 | 10.570694 | 13.131567 | 15.020958 |
| 5.26 | 4.324631 | 5.178445 | 7.014251 | 7.533446 | 8.512113 | 10.641761 | 13.170290 | 14.981013 |
| 5.36 | 4.314132 | 5.174190 | 6.961863 | 7.505076 | 8.491564 | 10.633162 | 13.072103 | 14.924802 |
| 5.46 | 4.312560 | 5.162350 | 7.013219 | 7.488023 | 8.488578 | 10.608966 | 13.168701 | 14.891079 |
| 5.56 | 4.320735 | 5.149239 | 6.984773 | 7.528191 | 8.504577 | 10.581906 | 13.115144 | 14.970795 |
| 5.66 | 4.307569 | 5.148682 | 6.975413 | 7.520964 | 8.478663 | 10.580764 | 13.097573 | 14.956428 |
| 5.76 | 4.336370 | 5.133778 | 7.011000 | 7.539042 | 8.535167 | 10.549905 | 13.164107 | 14.992051 |
| 5.86 | 4.333653 | 5.158762 | 7.009312 | 7.538404 | 8.530028 | 10.601509 | 13.161262 | 14.991153 |
| 5.96 | 4.323620 | 5.177559 | 6.967587 | 7.504648 | 8.510085 | 10.639894 | 13.082615 | 14.923681 |
| 6.06 | 4.326108 | 5.174158 | 6.990354 | 7.544269 | 8.514712 | 10.632567 | 13.124946 | 15.001996 |
| 6.16 | 4.336761 | 5.144270 | 7.017278 | 7.538537 | 8.535951 | 10.571486 | 13.175917 | 14.991073 |
| 6.26 | 4.334430 | 5.168050 | 6.995638 | 7.506614 | 8.531177 | 10.620121 | 13.134998 | 14.927265 |
| 6.36 | 4.341983 | 5.150225 | 6.979153 | 7.532975 | 8.545846 | 10.583249 | 13.103746 | 14.979341 |
| 6.46 | 4.323033 | 5.135222 | 7.005320 | 7.534128 | 8.508666 | 10.552564 | 13.153057 | 14.981839 |
| 6.56 | 4.341207 | 5.136666 | 7.010750 | 7.489075 | 8.544259 | 10.555311 | 13.162978 | 14.891941 |
| 6.66 | 4.333935 | 5.173457 | 7.005656 | 7.537040 | 8.530033 | 10.631022 | 13.153548 | 14.987472 |
| 6.76 | 4.319041 | 5.174276 | 7.012502 | 7.534064 | 8.500432 | 10.632343 | 13.165956 | 14.981046 |
| 6.86 | 4.316251 | 5.154896 | 6.967097 | 7.525774 | 8.495056 | 10.592667 | 13.080888 | 14.964768 |
| 6.96 | 4.337256 | 5.140874 | 6.978324 | 7.530392 | 8.536127 | 10.563518 | 13.101551 | 14.973476 |
| 7.06 | 4.315365 | 5.150741 | 6.973759 | 7.538344 | 8.493059 | 10.583811 | 13.093003 | 14.989312 |
| 7.16 | 4.323780 | 5.169599 | 7.017210 | 7.488077 | 8.509433 | 10.622328 | 13.174291 | 14.889036 |
| 7.26 | 4.338109 | 5.174488 | 6.985722 | 7.494247 | 8.537362 | 10.632038 | 13.114760 | 14.900831 |
| 7.36 | 4.336567 | 5.156877 | 6.988990 | 7.540799 | 8.534151 | 10.595631 | 13.120622 | 14.993079 |
| 7.46 | 4.335808 | 5.159657 | 6.963518 | 7.519010 | 8.532756 | 10.601467 | 13.072954 | 14.949930 |
| 7.56 | 4.308009 | 5.168091 | 6.989494 | 7.539731 | 8.478051 | 10.618798 | 13.121725 | 14.991135 |
| 7.66 | 4.329019 | 5.138298 | 7.005754 | 7.486788 | 8.519212 | 10.557353 | 13.151962 | 14.885544 |
| 7.76 | 4.315907 | 5.165958 | 6.997064 | 7.530147 | 8.493516 | 10.614318 | 13.135815 | 14.971941 |
| 7.86 | 4.329830 | 5.152161 | 6.963647 | 7.549388 | 8.520729 | 10.585738 | 13.072794 | 15.009868 |
| 7.96 | 4.320008 | 5.143602 | 7.009773 | 7.509899 | 8.501223 | 10.567933 | 13.159112 | 14.931046 |
| 8.06 | 4.336670 | 5.147730 | 7.017770 | 7.542839 | 8.533733 | 10.576068 | 13.173691 | 14.996043 |
| 8.16 | 4.310417 | 5.150791 | 6.968226 | 7.531722 | 8.481876 | 10.582112 | 13.080387 | 14.973596 |
| 8.26 | 4.333596 | 5.167176 | 6.957582 | 7.498178 | 8.527581 | 10.615892 | 13.060551 | 14.907073 |
| 8.36 | 4.337627 | 5.137808 | 6.991701 | 7.546231 | 8.535631 | 10.555702 | 13.124779 | 15.002814 |
| 8.46 | 4.321496 | 5.175893 | 7.009897 | 7.514918 | 8.503711 | 10.633725 | 13.158662 | 14.940248 |
| 8.56 | 4.331768 | 5.151874 | 6.978570 | 7.498111 | 8.523899 | 10.584348 | 13.099819 | 14.906792 |
| 8.66 | 4.318274 | 5.136030 | 6.968570 | 7.539566 | 8.497077 | 10.551462 | 13.080631 | 14.988731 |
| 8.76 | 4.337245 | 5.162575 | 6.983623 | 7.525605 | 8.534219 | 10.605764 | 13.108600 | 14.960649 |
| 8.86 | 4.330817 | 5.140684 | 6.984527 | 7.493638 | 8.521772 | 10.561041 | 13.110608 | 14.897452 |
| 8.96 | 4.312718 | 5.165357 | 6.985195 | 7.525287 | 8.485878 | 10.611382 | 13.111430 | 14.959879 |
| 9.06 | 4.338557 | 5.159657 | 6.990339 | 7.527739 | 8.536754 | 10.599714 | 13.121137 | 14.964812 |
| 9.16 | 4.312033 | 5.168433 | 6.969421 | 7.516517 | 8.484388 | 10.617521 | 13.081602 | 14.942191 |
| 9.26 | 4.314627 | 5.147619 | 6.974282 | 7.523674 | 8.489195 | 10.574394 | 13.090267 | 14.955895 |
| 9.36 | 4.342231 | 5.169565 | 6.963667 | 7.520131 | 8.543633 | 10.619632 | 13.070536 | 14.949075 |
| 9.46 | 4.333243 | 5.167188 | 6.983229 | 7.546426 | 8.525678 | 10.614413 | 13.106837 | 15.000869 |
| 9.56 | 4.322504 | 5.150220 | 6.963241 | 7.510226 | 8.504345 | 10.579303 | 13.069008 | 14.928551 |
| 9.66 | 4.338616 | 5.136338 | 6.996892 | 7.542539 | 8.536140 | 10.550905 | 13.132314 | 14.992952 |
| 9.76 | 4.337326 | 5.132015 | 6.972800 | 7.504829 | 8.533322 | 10.541678 | 13.086667 | 14.917501 |
| 9.86 | 4.340651 | 5.167492 | 6.977164 | 7.521704 | 8.539574 | 10.614193 | 13.094412 | 14.950537 |
| 9.96 | 4.328096 | 5.154126 | 6.994528 | 7.505803 | 8.514687 | 10.586507 | 13.126713 | 14.918605 |
| 10.06 | 4.330662 | 5.160616 | 6.964302 | 7.528074 | 8.519769 | 10.599877 | 13.070038 | 14.962928 |
| 10.16 | 4.312045 | 5.143214 | 6.992454 | 7.541654 | 8.482966 | 10.563915 | 13.122599 | 14.989609 |
| 10.26 | 4.339160 | 5.140410 | 6.988646 | 7.491254 | 8.536104 | 10.557900 | 13.115137 | 14.889076 |
| 10.36 | 4.338125 | 5.167103 | 6.963519 | 7.531360 | 8.534255 | 10.612958 | 13.068268 | 14.969117 |
| 10.46 | 4.322374 | 5.144054 | 7.009463 | 7.522972 | 8.502905 | 10.565167 | 13.153929 | 14.951808 |
| 10.56 | 4.313575 | 5.134275 | 6.959213 | 7.482418 | 8.485391 | 10.544828 | 13.059315 | 14.870848 |
| 10.66 | 4.325664 | 5.164278 | 7.003155 | 7.505906 | 8.509205 | 10.606490 | 13.141827 | 14.917588 |
| 10.76 | 4.321714 | 5.139991 | 7.016165 | 7.535314 | 8.501157 | 10.556262 | 13.165808 | 14.975542 |
| 10.86 | 4.341464 | 5.139174 | 6.992332 | 7.540239 | 8.539811 | 10.554341 | 13.120783 | 14.984985 |
| 10.96 | 4.310172 | 5.133086 | 7.007089 | 7.499185 | 8.478344 | 10.541945 | 13.148608 | 14.903549 |
| 11.06 | 4.332548 | 5.135362 | 7.000702 | 7.522013 | 8.522088 | 10.546284 | 13.136206 | 14.948441 |
| 11.16 | 4.339946 | 5.130421 | 6.962515 | 7.519307 | 8.536767 | 10.536294 | 13.064745 | 14.943286 |
| 11.26 | 4.342297 | 5.131773 | 6.974329 | 7.507728 | 8.541184 | 10.538817 | 13.086599 | 14.919915 |
| 11.36 | 4.324010 | 5.167258 | 7.002413 | 7.484209 | 8.505248 | 10.611731 | 13.139346 | 14.873233 |
| 11.46 | 4.305499 | 5.139146 | 7.009520 | 7.510640 | 8.468569 | 10.553665 | 13.152264 | 14.925285 |
| 11.56 | 4.328170 | 5.144588 | 6.965660 | 7.506534 | 8.513259 | 10.564961 | 13.070118 | 14.917299 |
| 11.66 | 4.322616 | 5.137587 | 6.960158 | 7.537075 | 8.502064 | 10.550249 | 13.059380 | 14.977514 |
| 11.76 | 4.327716 | 5.131057 | 7.004693 | 7.490742 | 8.511712 | 10.536365 | 13.142352 | 14.884774 |
| 11.86 | 4.306628 | 5.172381 | 6.983425 | 7.481958 | 8.470354 | 10.621368 | 13.102628 | 14.867525 |
| 11.96 | 4.322683 | 5.139143 | 7.006215 | 7.516148 | 8.501755 | 10.552895 | 13.145114 | 14.935154 |
| 12.06 | 4.315161 | 5.155210 | 6.982339 | 7.538669 | 8.487045 | 10.585997 | 13.100451 | 14.980056 |
| 12.16 | 4.310534 | 5.129187 | 6.994794 | 7.480966 | 8.477658 | 10.532201 | 13.123374 | 14.864890 |
| 12.26 | 4.311998 | 5.162559 | 6.963307 | 7.523912 | 8.480351 | 10.600495 | 13.064012 | 14.949897 |
| 12.36 | 4.341672 | 5.152869 | 6.956984 | 7.494593 | 8.538533 | 10.580377 | 13.051878 | 14.891332 |
| 12.46 | 4.329359 | 5.145614 | 7.008252 | 7.527739 | 8.514434 | 10.565625 | 13.148242 | 14.957396 |
| 12.56 | 4.309099 | 5.167957 | 6.992442 | 7.487181 | 8.474303 | 10.611142 | 13.118134 | 14.876304 |
| 12.66 | 4.319467 | 5.164670 | 6.984167 | 7.527897 | 8.494422 | 10.604058 | 13.102193 | 14.956726 |
| 12.76 | 4.331637 | 5.168474 | 6.978294 | 7.528485 | 8.518168 | 10.611635 | 13.090890 | 14.957568 |
| 12.86 | 4.333706 | 5.160365 | 7.002639 | 7.526478 | 8.522406 | 10.595195 | 13.136820 | 14.953875 |
| 12.96 | 4.335032 | 5.150080 | 6.982870 | 7.481110 | 8.524920 | 10.573963 | 13.099589 | 14.863574 |
| 13.06 | 4.339428 | 5.168308 | 6.973123 | 7.542444 | 8.533681 | 10.611533 | 13.081485 | 14.985639 |
| 13.16 | 4.335766 | 5.167570 | 6.979056 | 7.503777 | 8.526303 | 10.609798 | 13.092342 | 14.908503 |
| 13.26 | 4.307249 | 5.150531 | 6.980333 | 7.502502 | 8.470311 | 10.574922 | 13.094871 | 14.906123 |
| 13.36 | 4.322638 | 5.145009 | 7.012920 | 7.538653 | 8.500284 | 10.563226 | 13.155556 | 14.977439 |
| 13.46 | 4.334772 | 5.126754 | 7.002825 | 7.543221 | 8.523968 | 10.525527 | 13.136345 | 14.986203 |
| 13.56 | 4.337727 | 5.151710 | 7.003514 | 7.539900 | 8.529497 | 10.576414 | 13.137206 | 14.979112 |
| 13.66 | 4.328216 | 5.146237 | 6.972611 | 7.505410 | 8.510904 | 10.565313 | 13.079404 | 14.910782 |
| 13.76 | 4.311130 | 5.160805 | 6.994631 | 7.539437 | 8.477422 | 10.595367 | 13.120889 | 14.978587 |
| 13.86 | 4.335851 | 5.134373 | 6.975412 | 7.481675 | 8.525763 | 10.540766 | 13.084422 | 14.863358 |
| 13.96 | 4.308950 | 5.156029 | 6.969970 | 7.511464 | 8.472682 | 10.584993 | 13.073927 | 14.922212 |
| 14.06 | 4.326269 | 5.149119 | 6.977780 | 7.491512 | 8.506749 | 10.570826 | 13.088600 | 14.882602 |
| 14.16 | 4.322334 | 5.164403 | 7.008848 | 7.532874 | 8.498835 | 10.601981 | 13.146601 | 14.964458 |
| 14.26 | 4.327903 | 5.167392 | 7.006663 | 7.491757 | 8.509873 | 10.608226 | 13.142636 | 14.882930 |
| 14.36 | 4.336775 | 5.127602 | 6.981048 | 7.511232 | 8.527139 | 10.526320 | 13.094316 | 14.921307 |
| 14.46 | 4.325660 | 5.140866 | 6.980663 | 7.482041 | 8.505382 | 10.553673 | 13.093746 | 14.863490 |
| 14.56 | 4.333150 | 5.150705 | 6.956001 | 7.541286 | 8.519933 | 10.573650 | 13.047215 | 14.980870 |
| 14.66 | 4.321883 | 5.144733 | 6.999626 | 7.509994 | 8.498050 | 10.561726 | 13.129459 | 14.919183 |
| 14.76 | 4.306982 | 5.157569 | 6.994948 | 7.478462 | 8.468564 | 10.587847 | 13.120397 | 14.856217 |
| 14.86 | 4.316170 | 5.139488 | 6.980841 | 7.526911 | 8.486738 | 10.550861 | 13.094103 | 14.952653 |
| 14.96 | 4.331724 | 5.157507 | 7.010082 | 7.519754 | 8.517227 | 10.587737 | 13.148807 | 14.938270 |
| 15.06 | 4.335955 | 5.135310 | 6.962196 | 7.504414 | 8.525549 | 10.542172 | 13.058990 | 14.907802 |
| 15.16 | 4.303764 | 5.141122 | 7.008613 | 7.484191 | 8.462069 | 10.553871 | 13.145766 | 14.867302 |
| 15.26 | 4.320583 | 5.129032 | 7.006446 | 7.537348 | 8.495246 | 10.529185 | 13.141868 | 14.973088 |
| 15.36 | 4.339720 | 5.152546 | 6.957609 | 7.536765 | 8.532780 | 10.577341 | 13.050123 | 14.971766 |
| 15.46 | 4.330835 | 5.152247 | 6.970709 | 7.512810 | 8.515428 | 10.576873 | 13.074873 | 14.924383 |
| 15.56 | 4.303583 | 5.143772 | 6.962258 | 7.532323 | 8.461666 | 10.559256 | 13.058750 | 14.962836 |
| 15.66 | 4.309736 | 5.144638 | 6.991671 | 7.514062 | 8.473579 | 10.560801 | 13.113631 | 14.926233 |
| 15.76 | 4.336471 | 5.137237 | 6.994356 | 7.489165 | 8.526253 | 10.545742 | 13.118833 | 14.876965 |
| 15.86 | 4.302878 | 5.137899 | 6.988286 | 7.498435 | 8.460288 | 10.547209 | 13.107580 | 14.895531 |
| 15.96 | 4.320762 | 5.164515 | 6.984210 | 7.517820 | 8.495578 | 10.602004 | 13.100131 | 14.934262 |
| 16.06 | 4.330528 | 5.136146 | 6.983693 | 7.488165 | 8.514593 | 10.543535 | 13.098874 | 14.875025 |
| 16.16 | 4.308803 | 5.149556 | 6.969383 | 7.488919 | 8.471795 | 10.570958 | 13.071903 | 14.876375 |
| 16.26 | 4.334024 | 5.144174 | 6.992818 | 7.494326 | 8.521177 | 10.559657 | 13.115544 | 14.886757 |
| 16.36 | 4.319000 | 5.148861 | 6.965776 | 7.509155 | 8.491825 | 10.569509 | 13.065112 | 14.916541 |
| 16.46 | 4.306592 | 5.124167 | 6.998521 | 7.524066 | 8.467244 | 10.518587 | 13.126239 | 14.945833 |
| 16.56 | 4.307775 | 5.144750 | 7.004609 | 7.480657 | 8.469384 | 10.560607 | 13.137370 | 14.859280 |
| 16.66 | 4.335497 | 5.137585 | 6.966109 | 7.493392 | 8.523995 | 10.546033 | 13.065328 | 14.884764 |
| 16.76 | 4.322163 | 5.144675 | 6.954727 | 7.522778 | 8.497686 | 10.560471 | 13.043837 | 14.942972 |
| 16.86 | 4.316491 | 5.130591 | 6.986429 | 7.535753 | 8.486630 | 10.531679 | 13.103443 | 14.968915 |
| 16.96 | 4.308673 | 5.148704 | 6.960545 | 7.523411 | 8.471073 | 10.568629 | 13.054610 | 14.944071 |
| 17.06 | 4.326950 | 5.161909 | 6.994926 | 7.521010 | 8.507217 | 10.595996 | 13.119417 | 14.939670 |
| 17.16 | 4.331729 | 5.164136 | 6.956957 | 7.507140 | 8.516418 | 10.600323 | 13.047903 | 14.911777 |
| 17.26 | 4.337634 | 5.129684 | 6.965672 | 7.482815 | 8.528143 | 10.529750 | 13.064427 | 14.863662 |
| 17.36 | 4.310570 | 5.143772 | 6.954449 | 7.502113 | 8.474851 | 10.558564 | 13.043249 | 14.901848 |
| 17.46 | 4.337724 | 5.136636 | 6.966821 | 7.527176 | 8.528354 | 10.544060 | 13.066633 | 14.951839 |
| 17.56 | 4.313791 | 5.140161 | 6.977512 | 7.501140 | 8.481207 | 10.551181 | 13.086541 | 14.899957 |
| 17.66 | 4.311675 | 5.141709 | 6.998815 | 7.496126 | 8.477152 | 10.554492 | 13.126662 | 14.890186 |
| 17.76 | 4.337620 | 5.165264 | 6.954027 | 7.486661 | 8.528070 | 10.602728 | 13.042515 | 14.871222 |
| 17.86 | 4.326344 | 5.130974 | 6.955981 | 7.498039 | 8.505723 | 10.532121 | 13.045910 | 14.893512 |
| 17.96 | 4.314113 | 5.137411 | 6.996847 | 7.506016 | 8.481856 | 10.545557 | 13.122831 | 14.909673 |
| 18.06 | 4.310914 | 5.162415 | 6.952543 | 7.485937 | 8.475381 | 10.596651 | 13.039451 | 14.869462 |
| 18.16 | 4.320934 | 5.128693 | 6.951227 | 7.478868 | 8.494884 | 10.527188 | 13.036682 | 14.855078 |
| 18.26 | 4.316242 | 5.144248 | 6.981522 | 7.539290 | 8.485870 | 10.559377 | 13.093822 | 14.975464 |
| 18.36 | 4.306132 | 5.153926 | 7.003480 | 7.522831 | 8.465808 | 10.579011 | 13.134717 | 14.942443 |
| 18.46 | 4.307263 | 5.134393 | 6.999220 | 7.508280 | 8.468217 | 10.539150 | 13.127016 | 14.913868 |
| 18.56 | 4.316978 | 5.135367 | 6.979193 | 7.486209 | 8.487224 | 10.541033 | 13.089312 | 14.869864 |
| 18.66 | 4.308320 | 5.132360 | 6.952785 | 7.495519 | 8.470329 | 10.535016 | 13.039977 | 14.888579 |
| 18.76 | 4.321675 | 5.127405 | 6.985051 | 7.508136 | 8.496381 | 10.524591 | 13.100177 | 14.913279 |
| 18.86 | 4.330972 | 5.135200 | 7.004171 | 7.488043 | 8.514480 | 10.540371 | 13.135761 | 14.873060 |
| 18.96 | 4.314669 | 5.138835 | 6.962131 | 7.483634 | 8.482609 | 10.548057 | 13.057195 | 14.864618 |
| 19.06 | 4.321586 | 5.156163 | 6.981651 | 7.499932 | 8.496022 | 10.583392 | 13.093517 | 14.896662 |
| 19.16 | 4.330053 | 5.125019 | 6.971916 | 7.492358 | 8.512774 | 10.519600 | 13.075425 | 14.881806 |
| 19.26 | 4.330698 | 5.165654 | 6.969874 | 7.509201 | 8.513949 | 10.602891 | 13.071453 | 14.915098 |
| 19.36 | 4.315336 | 5.138094 | 6.968916 | 7.509220 | 8.483875 | 10.546478 | 13.069850 | 14.915358 |
| 19.46 | 4.316969 | 5.124545 | 6.959383 | 7.477329 | 8.487201 | 10.518813 | 13.052150 | 14.852217 |
| 19.56 | 4.312447 | 5.162336 | 6.953814 | 7.477715 | 8.478218 | 10.596267 | 13.041563 | 14.852820 |
| 19.66 | 4.318759 | 5.140051 | 6.992783 | 7.528484 | 8.490807 | 10.550748 | 13.114926 | 14.953979 |
| 19.76 | 4.313156 | 5.129938 | 6.950439 | 7.509380 | 8.479688 | 10.529863 | 13.035352 | 14.915853 |
| 19.86 | 4.328434 | 5.125939 | 6.951970 | 7.506181 | 8.509843 | 10.521799 | 13.038403 | 14.909703 |
| 19.96 | 4.317107 | 5.133046 | 6.985755 | 7.481139 | 8.487397 | 10.536167 | 13.101492 | 14.859651 |
| 20.06 | 4.326298 | 5.148599 | 7.005300 | 7.493110 | 8.505372 | 10.567975 | 13.138004 | 14.883267 |
| 20.16 | 4.325204 | 5.126571 | 6.998865 | 7.525052 | 8.503036 | 10.522530 | 13.125648 | 14.946384 |
| 20.26 | 4.324531 | 5.145132 | 6.974390 | 7.476921 | 8.501992 | 10.560975 | 13.080178 | 14.851274 |
| 20.36 | 4.311352 | 5.141927 | 7.002318 | 7.474639 | 8.475972 | 10.554258 | 13.132384 | 14.846545 |
| 20.46 | 4.317656 | 5.128165 | 6.971513 | 7.499905 | 8.488575 | 10.526271 | 13.074934 | 14.897099 |
| 20.56 | 4.336161 | 5.156485 | 6.951833 | 7.493926 | 8.524778 | 10.584180 | 13.037753 | 14.884913 |
| 20.66 | 4.312586 | 5.135862 | 7.001751 | 7.513579 | 8.478610 | 10.542073 | 13.131648 | 14.924264 |
| 20.76 | 4.323060 | 5.134058 | 6.985812 | 7.533798 | 8.499318 | 10.538515 | 13.101937 | 14.964631 |
| 20.86 | 4.335521 | 5.165679 | 6.982867 | 7.500971 | 8.523734 | 10.603318 | 13.096283 | 14.899279 |
| 20.96 | 4.330660 | 5.126071 | 6.995304 | 7.495004 | 8.514368 | 10.522254 | 13.119904 | 14.887763 |
| 21.06 | 4.305416 | 5.158777 | 6.997947 | 7.475134 | 8.464643 | 10.589274 | 13.124717 | 14.848130 |
| 21.16 | 4.318432 | 5.136486 | 6.960043 | 7.477321 | 8.490359 | 10.543674 | 13.053822 | 14.852695 |
| 21.26 | 4.314366 | 5.158275 | 6.949585 | 7.482796 | 8.482179 | 10.588167 | 13.033922 | 14.863244 |
| 21.36 | 4.304571 | 5.165557 | 6.997738 | 7.487749 | 8.463101 | 10.603339 | 13.124510 | 14.873397 |
| 21.46 | 4.300886 | 5.146361 | 6.944178 | 7.525196 | 8.455763 | 10.563819 | 13.023914 | 14.947616 |
| 21.56 | 4.323152 | 5.124162 | 7.003419 | 7.523205 | 8.499344 | 10.518009 | 13.134718 | 14.943317 |
| 21.66 | 4.300268 | 5.139065 | 6.979208 | 7.534790 | 8.454168 | 10.548368 | 13.089025 | 14.966000 |
| 21.76 | 4.303138 | 5.152024 | 6.965569 | 7.531246 | 8.460028 | 10.575241 | 13.063782 | 14.959347 |
| 21.86 | 4.305187 | 5.125765 | 6.966399 | 7.506809 | 8.463964 | 10.521225 | 13.065196 | 14.910643 |
| 21.96 | 4.327196 | 5.139567 | 6.962256 | 7.496147 | 8.507411 | 10.549777 | 13.057698 | 14.889779 |
| 22.06 | 4.312325 | 5.124588 | 6.980577 | 7.506775 | 8.477980 | 10.518787 | 13.091757 | 14.910544 |
| 22.16 | 4.317833 | 5.142609 | 6.943733 | 7.532476 | 8.488715 | 10.555661 | 13.022515 | 14.961429 |
| 22.26 | 4.318096 | 5.123148 | 7.000049 | 7.471993 | 8.489055 | 10.515497 | 13.127858 | 14.840985 |
| 22.36 | 4.301463 | 5.132693 | 6.960624 | 7.495577 | 8.456171 | 10.534857 | 13.053635 | 14.887501 |
| 22.46 | 4.322977 | 5.141122 | 6.965027 | 7.491863 | 8.498675 | 10.552419 | 13.062215 | 14.880494 |
| 22.56 | 4.302004 | 5.132355 | 6.949791 | 7.513258 | 8.457359 | 10.534320 | 13.033512 | 14.922840 |
| 22.66 | 4.297909 | 5.160521 | 6.984969 | 7.493893 | 8.449105 | 10.591876 | 13.099169 | 14.884019 |
| 22.76 | 4.334468 | 5.130197 | 6.963321 | 7.514506 | 8.521155 | 10.529858 | 13.058847 | 14.925275 |
| 22.86 | 4.333581 | 5.150977 | 6.946185 | 7.514226 | 8.519233 | 10.572289 | 13.026440 | 14.924408 |
| 22.96 | 4.323848 | 5.158115 | 6.951906 | 7.472299 | 8.500006 | 10.586823 | 13.037026 | 14.840971 |
| 23.06 | 4.319887 | 5.125514 | 6.964476 | 7.483696 | 8.492033 | 10.519681 | 13.060311 | 14.863280 |
| 23.16 | 4.322641 | 5.136195 | 6.949855 | 7.470618 | 8.497252 | 10.541360 | 13.032592 | 14.836966 |
| 23.26 | 4.331677 | 5.163263 | 6.948442 | 7.471319 | 8.514828 | 10.596679 | 13.029656 | 14.838032 |
| 23.36 | 4.333447 | 5.160288 | 6.957812 | 7.497283 | 8.518433 | 10.590732 | 13.047420 | 14.889817 |
| 23.46 | 4.312376 | 5.129243 | 7.003277 | 7.491502 | 8.476828 | 10.526786 | 13.132389 | 14.878009 |
| 23.56 | 4.305867 | 5.133602 | 6.947236 | 7.478019 | 8.463948 | 10.535627 | 13.027173 | 14.851085 |
| 23.66 | 4.328584 | 5.123777 | 6.954704 | 7.532391 | 8.508702 | 10.515586 | 13.041329 | 14.959238 |
| 23.76 | 4.334106 | 5.158803 | 6.999783 | 7.494473 | 8.519378 | 10.587248 | 13.125586 | 14.883623 |
| 23.86 | 4.297827 | 5.159359 | 6.955810 | 7.479636 | 8.448182 | 10.588535 | 13.043310 | 14.854363 |
| 23.96 | 4.298514 | 5.141909 | 6.942252 | 7.488893 | 8.449355 | 10.552502 | 13.017614 | 14.872436 |
| 24.06 | 4.302842 | 5.156960 | 6.996028 | 7.495569 | 8.457660 | 10.583136 | 13.118134 | 14.885335 |
| 24.16 | 4.296819 | 5.145550 | 6.993816 | 7.483378 | 8.445945 | 10.559877 | 13.114180 | 14.861346 |
| 24.26 | 4.324025 | 5.120611 | 6.976582 | 7.515760 | 8.499026 | 10.508205 | 13.081255 | 14.924956 |
| 24.36 | 4.327979 | 5.147536 | 6.946894 | 7.519121 | 8.506611 | 10.563226 | 13.025303 | 14.931304 |
| 24.46 | 4.310513 | 5.135237 | 6.994283 | 7.490939 | 8.472189 | 10.537873 | 13.114013 | 14.875176 |
| 24.56 | 4.302524 | 5.140594 | 6.976721 | 7.489733 | 8.456593 | 10.548999 | 13.081250 | 14.872969 |
| 24.66 | 4.334360 | 5.150375 | 6.968070 | 7.527117 | 8.518981 | 10.568838 | 13.064743 | 14.946878 |
| 24.76 | 4.307127 | 5.162747 | 7.000979 | 7.475696 | 8.465279 | 10.594005 | 13.126170 | 14.844460 |
| 24.86 | 4.298659 | 5.126511 | 6.947319 | 7.469241 | 8.448542 | 10.519533 | 13.025421 | 14.831479 |
| 24.96 | 4.310500 | 5.160183 | 6.992534 | 7.524449 | 8.471638 | 10.588407 | 13.109920 | 14.940793 |
| 25.06 | 4.308880 | 5.125307 | 6.983151 | 7.470067 | 8.468249 | 10.516589 | 13.092012 | 14.832451 |
| 25.16 | 4.324319 | 5.144811 | 6.994545 | 7.531017 | 8.498413 | 10.556389 | 13.113100 | 14.953160 |
| 25.26 | 4.333246 | 5.149616 | 6.978344 | 7.473304 | 8.515770 | 10.566016 | 13.082439 | 14.838243 |
| 25.36 | 4.306158 | 5.127856 | 6.966741 | 7.501779 | 8.462361 | 10.521149 | 13.060414 | 14.894469 |
| 25.46 | 4.297181 | 5.136357 | 6.985155 | 7.499842 | 8.444607 | 10.538452 | 13.094762 | 14.890427 |
| 25.56 | 4.313625 | 5.152100 | 6.989986 | 7.467326 | 8.476736 | 10.570521 | 13.103531 | 14.825543 |
| 25.66 | 4.309873 | 5.125565 | 6.974119 | 7.519516 | 8.469187 | 10.515860 | 13.073514 | 14.928849 |
| 25.76 | 4.317761 | 5.147033 | 6.950916 | 7.498407 | 8.484772 | 10.560013 | 13.030150 | 14.887091 |
| 25.86 | 4.309562 | 5.156078 | 6.982164 | 7.470278 | 8.468569 | 10.578453 | 13.088584 | 14.831083 |
| 25.96 | 4.325634 | 5.139152 | 6.975047 | 7.516422 | 8.500049 | 10.543599 | 13.075084 | 14.922513 |
| 26.06 | 4.323618 | 5.162678 | 6.945070 | 7.492824 | 8.496204 | 10.592012 | 13.019071 | 14.875869 |
| 26.16 | 4.324132 | 5.162602 | 6.953017 | 7.511902 | 8.497121 | 10.591739 | 13.033824 | 14.913582 |
| 26.26 | 4.313658 | 5.125241 | 6.954024 | 7.468787 | 8.476152 | 10.514609 | 13.035118 | 14.827308 |
| 26.36 | 4.300766 | 5.157602 | 6.985222 | 7.518600 | 8.450633 | 10.580767 | 13.093310 | 14.925872 |
| 26.46 | 4.328653 | 5.151558 | 6.990593 | 7.495290 | 8.505336 | 10.568252 | 13.103233 | 14.879433 |
| 26.56 | 4.299531 | 5.146038 | 6.994749 | 7.498614 | 8.447920 | 10.556684 | 13.110722 | 14.885688 |
| 26.66 | 4.303259 | 5.124565 | 6.958266 | 7.478535 | 8.455151 | 10.512517 | 13.042195 | 14.845666 |
| 26.76 | 4.333928 | 5.123422 | 6.983376 | 7.474146 | 8.515233 | 10.509953 | 13.088986 | 14.836643 |
| 26.86 | 4.332603 | 5.129610 | 6.980568 | 7.518096 | 8.512840 | 10.522907 | 13.084047 | 14.924255 |
| 26.96 | 4.323253 | 5.158222 | 6.945923 | 7.468997 | 8.494377 | 10.581487 | 13.018968 | 14.826625 |
| 27.06 | 4.315135 | 5.139054 | 6.992210 | 7.486973 | 8.478029 | 10.541674 | 13.105112 | 14.861615 |
| 27.16 | 4.326460 | 5.125696 | 6.978534 | 7.526185 | 8.500195 | 10.514167 | 13.079351 | 14.939304 |
| 27.26 | 4.327936 | 5.159579 | 6.992802 | 7.514638 | 8.503194 | 10.583793 | 13.106243 | 14.916555 |
| 27.36 | 4.331240 | 5.140246 | 6.976138 | 7.466752 | 8.509592 | 10.544019 | 13.074867 | 14.821339 |
| 27.46 | 4.299323 | 5.136903 | 6.949029 | 7.530509 | 8.446801 | 10.537058 | 13.023931 | 14.947747 |
| 27.56 | 4.332033 | 5.158143 | 6.957675 | 7.511661 | 8.510973 | 10.580511 | 13.039991 | 14.910170 |
| 27.66 | 4.316159 | 5.132604 | 6.985246 | 7.489851 | 8.479962 | 10.528344 | 13.091938 | 14.867190 |
| 27.76 | 4.332525 | 5.139388 | 6.970991 | 7.486599 | 8.511920 | 10.542017 | 13.064920 | 14.860392 |
| 27.86 | 4.323163 | 5.119440 | 6.969620 | 7.498130 | 8.493644 | 10.501242 | 13.062530 | 14.883484 |
| 27.96 | 4.298451 | 5.128342 | 6.981844 | 7.479281 | 8.445001 | 10.519387 | 13.085296 | 14.845907 |
| 28.06 | 4.332650 | 5.131926 | 6.987436 | 7.486958 | 8.512012 | 10.526519 | 13.095503 | 14.860836 |
| 28.16 | 4.309594 | 5.143325 | 6.942138 | 7.529553 | 8.466894 | 10.550124 | 13.010884 | 14.945699 |
| 28.26 | 4.304026 | 5.130454 | 6.950640 | 7.516313 | 8.455778 | 10.523503 | 13.026546 | 14.919107 |
| 28.36 | 4.330183 | 5.131559 | 6.982472 | 7.515290 | 8.507055 | 10.525631 | 13.086031 | 14.916879 |
| 28.46 | 4.295269 | 5.147359 | 6.963049 | 7.514236 | 8.438370 | 10.557922 | 13.049487 | 14.914623 |
| 28.56 | 4.328657 | 5.157780 | 6.959772 | 7.487187 | 8.503870 | 10.579183 | 13.043202 | 14.860771 |
| 28.66 | 4.316715 | 5.145599 | 6.977961 | 7.521029 | 8.480233 | 10.553976 | 13.077017 | 14.927630 |
| 28.76 | 4.301455 | 5.162063 | 6.998858 | 7.517723 | 8.450463 | 10.588008 | 13.116504 | 14.921437 |
| 28.86 | 4.325301 | 5.123655 | 6.942803 | 7.491543 | 8.497218 | 10.509112 | 13.011308 | 14.869311 |
| 28.96 | 4.302320 | 5.129427 | 6.999998 | 7.480366 | 8.452288 | 10.521224 | 13.118835 | 14.847510 |
| 29.06 | 4.309104 | 5.152703 | 6.980452 | 7.494095 | 8.465504 | 10.568828 | 13.082030 | 14.874565 |
| 29.16 | 4.332024 | 5.138524 | 6.955895 | 7.525047 | 8.510345 | 10.539513 | 13.035722 | 14.935672 |
| 29.26 | 4.310689 | 5.162096 | 6.968802 | 7.519257 | 8.468349 | 10.587756 | 13.059780 | 14.924032 |
| 29.36 | 4.309880 | 5.161888 | 6.960140 | 7.495587 | 8.466667 | 10.587213 | 13.043405 | 14.876888 |
| 29.46 | 4.305235 | 5.148828 | 6.977499 | 7.525686 | 8.457750 | 10.560687 | 13.076259 | 14.936998 |
| 29.56 | 4.303325 | 5.131134 | 6.995340 | 7.486665 | 8.453813 | 10.524164 | 13.109406 | 14.859221 |
| 29.66 | 4.316859 | 5.158703 | 6.996502 | 7.523638 | 8.480296 | 10.580582 | 13.111425 | 14.932423 |
| 29.76 | 4.298625 | 5.119424 | 6.986471 | 7.507852 | 8.444476 | 10.500020 | 13.092627 | 14.901092 |
| 29.86 | 4.323566 | 5.136183 | 6.944481 | 7.477898 | 8.493379 | 10.534276 | 13.013795 | 14.841480 |
| 29.96 | 4.315004 | 5.132549 | 6.940641 | 7.510967 | 8.476739 | 10.527046 | 13.006874 | 14.907426 |
| 30.06 | 4.297682 | 5.154221 | 6.951336 | 7.495511 | 8.442711 | 10.571496 | 13.026917 | 14.876751 |
| 30.16 | 4.306496 | 5.136316 | 6.981831 | 7.468758 | 8.459933 | 10.534656 | 13.083922 | 14.823489 |
| 30.26 | 4.316139 | 5.137218 | 6.973255 | 7.487834 | 8.478792 | 10.536402 | 13.067720 | 14.861203 |
| 30.36 | 4.326456 | 5.121819 | 6.942019 | 7.465712 | 8.498965 | 10.504704 | 13.009042 | 14.817134 |
| 30.46 | 4.310647 | 5.151905 | 6.967909 | 7.516243 | 8.467817 | 10.566293 | 13.057416 | 14.917259 |
| 30.56 | 4.322731 | 5.116678 | 6.958701 | 7.491073 | 8.491765 | 10.494303 | 13.040483 | 14.867672 |
| 30.66 | 4.323135 | 5.130255 | 6.989906 | 7.515593 | 8.492475 | 10.522047 | 13.098831 | 14.916190 |
| 30.76 | 4.312093 | 5.136997 | 6.982791 | 7.515153 | 8.470671 | 10.535735 | 13.085324 | 14.915120 |
| 30.86 | 4.294353 | 5.157522 | 6.972399 | 7.493553 | 8.435731 | 10.577715 | 13.065708 | 14.872088 |
| 30.96 | 4.307285 | 5.144674 | 6.962627 | 7.518225 | 8.461041 | 10.551249 | 13.047252 | 14.920888 |
| 31.06 | 4.331600 | 5.157700 | 6.988686 | 7.503620 | 8.508720 | 10.577858 | 13.095954 | 14.891757 |
| 31.16 | 4.328894 | 5.119987 | 6.973843 | 7.498175 | 8.503676 | 10.500848 | 13.068558 | 14.881425 |
| 31.26 | 4.325763 | 5.125399 | 6.988512 | 7.499841 | 8.497524 | 10.511949 | 13.096046 | 14.884732 |
| 31.36 | 4.299889 | 5.144166 | 6.938522 | 7.484843 | 8.446605 | 10.550322 | 13.002225 | 14.854802 |
| 31.46 | 4.299072 | 5.159051 | 6.966241 | 7.508561 | 8.444824 | 10.580630 | 13.053895 | 14.901562 |
| 31.56 | 4.324091 | 5.161771 | 6.962039 | 7.473800 | 8.493969 | 10.586207 | 13.046021 | 14.832576 |
| 31.66 | 4.307761 | 5.129298 | 6.978276 | 7.478602 | 8.461780 | 10.519471 | 13.076274 | 14.841911 |
| 31.76 | 4.323839 | 5.126830 | 6.972850 | 7.478186 | 8.492904 | 10.513842 | 13.065403 | 14.840285 |
| 31.86 | 4.297826 | 5.147246 | 6.955198 | 7.505650 | 8.441718 | 10.555596 | 13.032185 | 14.894623 |
| 31.96 | 4.314643 | 5.121441 | 6.974500 | 7.469022 | 8.474666 | 10.502573 | 13.068221 | 14.821790 |
| 32.06 | 4.323914 | 5.144291 | 6.959049 | 7.503855 | 8.493146 | 10.549768 | 13.039687 | 14.891387 |
| 32.16 | 4.297252 | 5.160231 | 6.985721 | 7.525429 | 8.440682 | 10.582340 | 13.089520 | 14.934037 |
| 32.26 | 4.307650 | 5.154827 | 6.945454 | 7.503039 | 8.460650 | 10.570689 | 13.013369 | 14.888804 |
| 32.36 | 4.310759 | 5.127391 | 6.996842 | 7.521680 | 8.466665 | 10.514312 | 13.109508 | 14.925630 |
| 32.46 | 4.324802 | 5.132673 | 6.968499 | 7.505436 | 8.494506 | 10.525466 | 13.056806 | 14.893854 |
| 32.56 | 4.308476 | 5.128256 | 6.996812 | 7.505977 | 8.462440 | 10.516409 | 13.109856 | 14.894927 |
| 32.66 | 4.310379 | 5.137774 | 6.953496 | 7.486403 | 8.466085 | 10.535811 | 13.028551 | 14.855922 |
| 32.76 | 4.313343 | 5.135353 | 6.973572 | 7.467139 | 8.471813 | 10.530730 | 13.066023 | 14.817531 |
| 32.86 | 4.327172 | 5.135608 | 6.947619 | 7.470777 | 8.498881 | 10.531137 | 13.017254 | 14.824588 |
| 32.96 | 4.297072 | 5.143202 | 6.989089 | 7.504215 | 8.439679 | 10.546607 | 13.094823 | 14.890793 |
| 33.06 | 4.302413 | 5.157589 | 6.967675 | 7.492533 | 8.450076 | 10.575992 | 13.054559 | 14.867448 |
| 33.16 | 4.305620 | 5.128729 | 6.996682 | 7.471656 | 8.456283 | 10.516696 | 13.108761 | 14.825859 |
| 33.26 | 4.322886 | 5.136817 | 6.945729 | 7.495063 | 8.490100 | 10.533167 | 13.013155 | 14.872142 |
| 33.36 | 4.310410 | 5.119409 | 6.954599 | 7.477479 | 8.465514 | 10.497365 | 13.029644 | 14.837104 |
| 33.46 | 4.304713 | 5.120225 | 6.963294 | 7.480438 | 8.454213 | 10.498901 | 13.045762 | 14.842779 |
| 33.56 | 4.315528 | 5.139411 | 6.968326 | 7.519718 | 8.475360 | 10.538126 | 13.055047 | 14.920555 |
| 33.66 | 4.328502 | 5.118942 | 6.976271 | 7.485929 | 8.500746 | 10.496039 | 13.069788 | 14.853348 |
| 33.76 | 4.322690 | 5.143284 | 6.944446 | 7.506734 | 8.489248 | 10.545846 | 13.010035 | 14.894482 |
| 33.86 | 4.303450 | 5.162283 | 6.950777 | 7.489146 | 8.451464 | 10.584802 | 13.021896 | 14.859585 |
| 33.96 | 4.321349 | 5.140517 | 6.938753 | 7.487886 | 8.486157 | 10.539604 | 12.998669 | 14.856283 |
| 34.06 | 4.295929 | 5.150536 | 6.987692 | 7.529086 | 8.436054 | 10.559915 | 13.090061 | 14.937698 |
| 34.16 | 4.331141 | 5.129501 | 6.952192 | 7.521594 | 8.505199 | 10.516787 | 13.023558 | 14.922833 |
| 34.26 | 4.308254 | 5.128309 | 6.950583 | 7.477018 | 8.460171 | 10.514241 | 13.020416 | 14.834248 |
| 34.36 | 4.327661 | 5.146968 | 6.938503 | 7.491436 | 8.498077 | 10.552241 | 12.997473 | 14.862493 |
| 34.46 | 4.326129 | 5.124019 | 6.948168 | 7.523932 | 8.494974 | 10.505075 | 13.015434 | 14.926799 |
| 34.56 | 4.298043 | 5.121051 | 6.956470 | 7.522199 | 8.439739 | 10.498886 | 13.030857 | 14.923213 |
| 34.66 | 4.303259 | 5.153977 | 6.979743 | 7.470801 | 8.449797 | 10.566157 | 13.074163 | 14.820919 |
| 34.76 | 4.298540 | 5.141291 | 6.981942 | 7.510033 | 8.440437 | 10.540033 | 13.078139 | 14.898586 |
| 34.86 | 4.310345 | 5.127120 | 6.955203 | 7.500007 | 8.463525 | 10.510865 | 13.027911 | 14.878532 |
| 34.96 | 4.317550 | 5.155378 | 6.997611 | 7.498146 | 8.477569 | 10.568669 | 13.107188 | 14.874661 |
| 35.06 | 4.326563 | 5.131938 | 6.951673 | 7.482257 | 8.495172 | 10.520500 | 13.020997 | 14.842976 |
| 35.16 | 4.309760 | 5.141405 | 6.952185 | 7.492274 | 8.462087 | 10.539792 | 13.021814 | 14.862685 |
| 35.26 | 4.315501 | 5.124552 | 6.955897 | 7.496236 | 8.473265 | 10.505128 | 13.028623 | 14.870381 |
| 35.36 | 4.324319 | 5.123395 | 6.965020 | 7.493067 | 8.490496 | 10.502652 | 13.045580 | 14.863948 |
| 35.46 | 4.331342 | 5.119740 | 6.993126 | 7.488811 | 8.504462 | 10.495379 | 13.098497 | 14.855816 |
| 35.56 | 4.327725 | 5.143028 | 6.986253 | 7.506837 | 8.497267 | 10.543003 | 13.085481 | 14.891411 |
| 35.66 | 4.315519 | 5.135011 | 6.985490 | 7.472076 | 8.473218 | 10.526465 | 13.083923 | 14.822307 |
| 35.76 | 4.327143 | 5.134704 | 6.941848 | 7.484833 | 8.495928 | 10.525695 | 13.002008 | 14.847417 |
| 35.86 | 4.314141 | 5.161800 | 6.978783 | 7.513791 | 8.469944 | 10.580670 | 13.070483 | 14.904057 |
| 35.96 | 4.300648 | 5.162328 | 6.971363 | 7.497118 | 8.443361 | 10.581637 | 13.056442 | 14.870823 |
| 36.06 | 4.319063 | 5.122836 | 6.970114 | 7.487338 | 8.479431 | 10.500583 | 13.053975 | 14.851277 |
| 36.16 | 4.321288 | 5.118419 | 6.954926 | 7.513208 | 8.484068 | 10.491862 | 13.025945 | 14.903064 |
| 36.26 | 4.311183 | 5.137388 | 6.952272 | 7.487121 | 8.464044 | 10.530515 | 13.020687 | 14.850992 |
| 36.36 | 4.298095 | 5.142683 | 6.983862 | 7.509137 | 8.438264 | 10.541264 | 13.079722 | 14.894515 |
| 36.46 | 4.303182 | 5.122438 | 6.961017 | 7.467712 | 8.448139 | 10.499627 | 13.036765 | 14.812151 |
| 36.56 | 4.305224 | 5.152919 | 6.959643 | 7.475029 | 8.452450 | 10.562482 | 13.034657 | 14.827194 |
| 36.66 | 4.316001 | 5.145038 | 6.948180 | 7.481603 | 8.473516 | 10.546213 | 13.013045 | 14.840073 |
| 36.76 | 4.325028 | 5.130180 | 6.959510 | 7.477152 | 8.491061 | 10.515537 | 13.033992 | 14.830932 |
| 36.86 | 4.301364 | 5.146527 | 6.980616 | 7.472300 | 8.444604 | 10.549043 | 13.073519 | 14.821310 |
| 36.96 | 4.304610 | 5.148761 | 6.991069 | 7.524541 | 8.451155 | 10.553846 | 13.093374 | 14.925245 |
| 37.06 | 4.311277 | 5.135542 | 6.984745 | 7.472959 | 8.463878 | 10.526296 | 13.080966 | 14.822291 |
| 37.16 | 4.297861 | 5.158341 | 6.972896 | 7.480744 | 8.437448 | 10.572911 | 13.058630 | 14.837568 |
| 37.26 | 4.326883 | 5.149977 | 6.981086 | 7.480790 | 8.494602 | 10.555992 | 13.074245 | 14.837974 |
| 37.36 | 4.303003 | 5.136663 | 6.982990 | 7.500368 | 8.447348 | 10.528235 | 13.077233 | 14.876147 |
| 37.46 | 4.319569 | 5.150273 | 6.997917 | 7.521920 | 8.480047 | 10.556353 | 13.105464 | 14.919209 |
| 37.56 | 4.306654 | 5.123005 | 6.967175 | 7.482188 | 8.454601 | 10.500348 | 13.047747 | 14.840241 |
| 37.66 | 4.322004 | 5.128764 | 6.953320 | 7.528545 | 8.484735 | 10.512151 | 13.021802 | 14.932185 |
| 37.76 | 4.320893 | 5.127624 | 6.985122 | 7.471048 | 8.482460 | 10.509700 | 13.081215 | 14.817983 |
| 37.86 | 4.323654 | 5.144292 | 6.981812 | 7.496926 | 8.487796 | 10.543758 | 13.074887 | 14.869162 |
| 37.96 | 4.300783 | 5.150094 | 6.988347 | 7.477958 | 8.442805 | 10.555534 | 13.086980 | 14.831378 |
| 38.06 | 4.330388 | 5.151118 | 6.941953 | 7.513480 | 8.500830 | 10.557518 | 12.999955 | 14.901665 |
| 38.16 | 4.321888 | 5.127407 | 6.993129 | 7.495597 | 8.484049 | 10.508804 | 13.095648 | 14.866035 |
| 38.26 | 4.325390 | 5.142321 | 6.945827 | 7.474826 | 8.491144 | 10.539643 | 13.007404 | 14.825222 |
| 38.36 | 4.303681 | 5.146311 | 6.968526 | 7.470745 | 8.448415 | 10.547682 | 13.049739 | 14.816932 |
| 38.46 | 4.318935 | 5.122949 | 6.978443 | 7.492277 | 8.478361 | 10.499801 | 13.068312 | 14.859637 |
| 38.56 | 4.320979 | 5.128052 | 6.979332 | 7.464112 | 8.482279 | 10.510144 | 13.069831 | 14.803614 |
| 38.66 | 4.312086 | 5.140108 | 6.964064 | 7.508022 | 8.464729 | 10.534736 | 13.041097 | 14.890537 |
| 38.76 | 4.318635 | 5.142261 | 6.967998 | 7.504074 | 8.477500 | 10.539045 | 13.048335 | 14.882561 |
| 38.86 | 4.295990 | 5.135514 | 6.951829 | 7.474815 | 8.432955 | 10.525101 | 13.017913 | 14.824368 |
| 38.96 | 4.317374 | 5.136577 | 6.994350 | 7.503975 | 8.474931 | 10.527280 | 13.097537 | 14.882199 |
| 39.06 | 4.324796 | 5.133897 | 6.996978 | 7.522357 | 8.489408 | 10.521671 | 13.102315 | 14.918492 |
| 39.16 | 4.319920 | 5.147533 | 6.973580 | 7.510092 | 8.479743 | 10.549501 | 13.058357 | 14.894004 |
| 39.26 | 4.313978 | 5.124172 | 6.978643 | 7.522848 | 8.467777 | 10.501250 | 13.067370 | 14.918769 |
| 39.36 | 4.312845 | 5.157883 | 6.950842 | 7.464661 | 8.465469 | 10.570230 | 13.015185 | 14.803229 |
| 39.46 | 4.316284 | 5.125891 | 6.938478 | 7.478599 | 8.472219 | 10.504668 | 12.992034 | 14.830870 |
| 39.56 | 4.302208 | 5.118094 | 6.977040 | 7.466873 | 8.444479 | 10.488550 | 13.064067 | 14.807421 |
| 39.66 | 4.306302 | 5.140928 | 6.974550 | 7.469562 | 8.452150 | 10.534889 | 13.058841 | 14.812114 |
| 39.76 | 4.310151 | 5.134937 | 6.989261 | 7.494102 | 8.459611 | 10.522497 | 13.086240 | 14.860612 |
| 39.86 | 4.318388 | 5.118203 | 6.964904 | 7.505102 | 8.476051 | 10.488544 | 13.041056 | 14.882905 |
| 39.96 | 4.307504 | 5.137029 | 6.966770 | 7.479253 | 8.454331 | 10.526681 | 13.044001 | 14.831020 |
| 40.06 | 4.332025 | 5.144439 | 6.980878 | 7.492601 | 8.502365 | 10.541749 | 13.070272 | 14.857325 |
| 40.16 | 4.304557 | 5.154480 | 6.952150 | 7.526724 | 8.448361 | 10.562207 | 13.016341 | 14.924826 |
| 40.26 | 4.308328 | 5.145342 | 6.954776 | 7.516887 | 8.455763 | 10.543484 | 13.021258 | 14.905320 |
| 40.36 | 4.306490 | 5.122993 | 6.967085 | 7.487834 | 8.452062 | 10.497571 | 13.044160 | 14.847546 |
| 40.46 | 4.311299 | 5.131817 | 6.943441 | 7.507810 | 8.461407 | 10.515536 | 12.999749 | 14.886993 |
| 40.56 | 4.327999 | 5.148619 | 6.989265 | 7.488234 | 8.493777 | 10.549462 | 13.084916 | 14.847467 |
| 40.66 | 4.323139 | 5.145311 | 6.940387 | 7.526427 | 8.484146 | 10.542568 | 12.993266 | 14.923030 |
| 40.76 | 4.325702 | 5.146139 | 6.986880 | 7.489110 | 8.489176 | 10.544264 | 13.080307 | 14.849040 |
| 40.86 | 4.325973 | 5.134942 | 6.980709 | 7.510496 | 8.489615 | 10.521205 | 13.068612 | 14.891278 |
| 40.96 | 4.327361 | 5.122593 | 6.948485 | 7.480691 | 8.492245 | 10.495787 | 13.008141 | 14.832020 |
| 41.06 | 4.315656 | 5.138786 | 6.976301 | 7.520713 | 8.468911 | 10.528514 | 13.059655 | 14.910733 |
| 41.16 | 4.321433 | 5.160296 | 6.980200 | 7.465104 | 8.480247 | 10.572584 | 13.066954 | 14.800482 |
| 41.26 | 4.332901 | 5.121808 | 6.988007 | 7.482905 | 8.502668 | 10.493625 | 13.081439 | 14.835628 |
| 41.36 | 4.304768 | 5.155865 | 6.949655 | 7.522955 | 8.447368 | 10.563286 | 13.009502 | 14.914866 |
| 41.46 | 4.313045 | 5.152680 | 6.985688 | 7.478569 | 8.463214 | 10.556267 | 13.076342 | 14.826175 |
| 41.56 | 4.322244 | 5.144271 | 6.975142 | 7.483265 | 8.481266 | 10.539039 | 13.056602 | 14.835485 |
| 41.66 | 4.319678 | 5.145239 | 6.987859 | 7.513111 | 8.476137 | 10.540907 | 13.080262 | 14.894489 |
| 41.76 | 4.308081 | 5.161940 | 6.995726 | 7.464452 | 8.453298 | 10.575016 | 13.094860 | 14.797878 |
| 41.86 | 4.327523 | 5.157042 | 6.988806 | 7.465977 | 8.491335 | 10.564843 | 13.081733 | 14.800706 |
| 41.96 | 4.312854 | 5.155681 | 6.939666 | 7.463611 | 8.462458 | 10.561938 | 12.989609 | 14.795853 |
| 42.06 | 4.299216 | 5.146195 | 6.960100 | 7.513556 | 8.435426 | 10.542167 | 13.027439 | 14.894384 |
| 42.16 | 4.309704 | 5.140418 | 6.958658 | 7.513809 | 8.455912 | 10.530216 | 13.024596 | 14.894723 |
| 42.26 | 4.303586 | 5.150533 | 6.947933 | 7.482155 | 8.443607 | 10.550559 | 13.004057 | 14.831445 |
| 42.36 | 4.297628 | 5.152273 | 6.983116 | 7.526300 | 8.431835 | 10.554019 | 13.069779 | 14.918802 |
| 42.46 | 4.308360 | 5.157875 | 6.991261 | 7.464952 | 8.452796 | 10.565379 | 13.084878 | 14.797033 |
| 42.56 | 4.321933 | 5.138204 | 6.978419 | 7.486742 | 8.479124 | 10.524708 | 13.060377 | 14.839697 |
| 42.66 | 4.333474 | 5.137825 | 6.976735 | 7.502008 | 8.501672 | 10.523816 | 13.057081 | 14.869793 |
| 42.76 | 4.333159 | 5.162142 | 6.975418 | 7.531064 | 8.500960 | 10.573508 | 13.054473 | 14.927219 |
| 42.86 | 4.320245 | 5.120988 | 6.978186 | 7.470970 | 8.475542 | 10.489110 | 13.059523 | 14.807961 |
| 42.96 | 4.311584 | 5.124077 | 6.957609 | 7.515362 | 8.458248 | 10.495062 | 13.020550 | 14.895416 |
| 43.06 | 4.318349 | 5.127666 | 6.960718 | 7.518149 | 8.471134 | 10.501937 | 13.025777 | 14.900264 |
| 43.16 | 4.319243 | 5.146604 | 6.943045 | 7.480460 | 8.472888 | 10.540723 | 12.992704 | 14.825569 |
| 43.26 | 4.332759 | 5.137917 | 6.984038 | 7.518136 | 8.499309 | 10.522815 | 13.069273 | 14.900075 |
| 43.36 | 4.301108 | 5.133065 | 6.953330 | 7.504751 | 8.437222 | 10.512878 | 13.011808 | 14.873549 |
| 43.46 | 4.332336 | 5.131111 | 6.946410 | 7.474892 | 8.498385 | 10.508760 | 12.998716 | 14.814207 |
| 43.56 | 4.296037 | 5.138600 | 6.948627 | 7.466632 | 8.427181 | 10.524099 | 13.002864 | 14.797837 |
| 43.66 | 4.323035 | 5.147611 | 6.951047 | 7.524504 | 8.479753 | 10.542072 | 13.006800 | 14.911852 |
| 43.76 | 4.296258 | 5.147124 | 6.978225 | 7.526121 | 8.427230 | 10.541076 | 13.057655 | 14.915055 |
| 43.86 | 4.305127 | 5.127573 | 6.969427 | 7.519205 | 8.444533 | 10.500919 | 13.041049 | 14.901186 |
| 43.96 | 4.297838 | 5.155614 | 6.991909 | 7.485003 | 8.430236 | 10.558346 | 13.083117 | 14.833407 |
| 44.06 | 4.312694 | 5.127226 | 6.966086 | 7.526920 | 8.459284 | 10.500095 | 13.034653 | 14.916310 |
| 44.16 | 4.330051 | 5.154872 | 6.974377 | 7.488269 | 8.492871 | 10.556142 | 13.049463 | 14.838916 |
| 44.26 | 4.304438 | 5.159271 | 7.001946 | 7.489057 | 8.442542 | 10.565033 | 13.100902 | 14.840313 |
| 44.36 | 4.314817 | 5.118715 | 6.994112 | 7.504647 | 8.462795 | 10.481858 | 13.086087 | 14.871028 |
| 44.46 | 4.328042 | 5.141655 | 6.968442 | 7.520105 | 8.488735 | 10.528832 | 13.038058 | 14.901659 |
| 44.56 | 4.329621 | 5.146915 | 7.000350 | 7.493911 | 8.491739 | 10.539488 | 13.097615 | 14.849589 |
| 44.66 | 4.302529 | 5.151396 | 6.989926 | 7.501338 | 8.438509 | 10.548548 | 13.077967 | 14.864143 |
| 44.76 | 4.321894 | 5.143958 | 6.999509 | 7.511680 | 8.476490 | 10.533317 | 13.095896 | 14.884635 |
| 44.86 | 4.326144 | 5.142534 | 6.976812 | 7.527728 | 8.484429 | 10.529908 | 13.052821 | 14.915738 |
| 44.96 | 4.304962 | 5.122253 | 6.963054 | 7.511618 | 8.442887 | 10.488381 | 13.027082 | 14.883818 |
| 45.06 | 4.315479 | 5.138941 | 6.951348 | 7.471178 | 8.463429 | 10.522447 | 13.005051 | 14.803540 |
| 45.16 | 4.296932 | 5.142686 | 6.997607 | 7.476182 | 8.426962 | 10.529999 | 13.091451 | 14.813293 |
| 45.26 | 4.311033 | 5.129005 | 6.962346 | 7.467162 | 8.454523 | 10.501871 | 13.025342 | 14.795258 |
| 45.36 | 4.303776 | 5.128971 | 6.961600 | 7.503631 | 8.440291 | 10.501802 | 13.023946 | 14.867517 |
| 45.46 | 4.308873 | 5.134960 | 6.958690 | 7.484503 | 8.450194 | 10.513949 | 13.018358 | 14.829453 |
| 45.56 | 4.327220 | 5.142213 | 7.001947 | 7.503921 | 8.486091 | 10.528695 | 13.099154 | 14.867781 |
| 45.66 | 4.311551 | 5.158108 | 6.971001 | 7.497246 | 8.455362 | 10.561239 | 13.041260 | 14.854555 |
| 45.76 | 4.329806 | 5.161141 | 6.967730 | 7.513916 | 8.491049 | 10.567310 | 13.034969 | 14.887388 |
| 45.86 | 4.314894 | 5.144560 | 6.970676 | 7.469300 | 8.461807 | 10.533362 | 13.040480 | 14.798989 |
| 45.96 | 4.323801 | 5.152923 | 6.983790 | 7.474147 | 8.478814 | 10.549912 | 13.064307 | 14.807791 |
| 46.06 | 4.333424 | 5.127473 | 7.002516 | 7.498651 | 8.497685 | 10.497807 | 13.099335 | 14.856337 |
| 46.16 | 4.309431 | 5.157221 | 6.951266 | 7.509512 | 8.450550 | 10.558608 | 13.003335 | 14.877708 |
| 46.26 | 4.306654 | 5.140628 | 6.949267 | 7.522209 | 8.445012 | 10.524521 | 12.999452 | 14.902699 |
| 46.36 | 4.310859 | 5.129521 | 6.952077 | 7.487403 | 8.453165 | 10.501665 | 13.004566 | 14.833579 |
| 46.46 | 4.320986 | 5.153774 | 6.957917 | 7.501274 | 8.472929 | 10.551203 | 13.015348 | 14.860898 |
| 46.56 | 4.297489 | 5.120231 | 7.001308 | 7.466063 | 8.426855 | 10.482531 | 13.096515 | 14.791140 |
| 46.66 | 4.333676 | 5.128446 | 6.990350 | 7.502440 | 8.497426 | 10.498869 | 13.075418 | 14.862528 |
| 46.76 | 4.308488 | 5.138988 | 6.956905 | 7.469809 | 8.448038 | 10.520451 | 13.012861 | 14.797886 |
| 46.86 | 4.313313 | 5.119045 | 6.997051 | 7.495942 | 8.457387 | 10.479486 | 13.087780 | 14.849460 |
| 46.96 | 4.330394 | 5.155944 | 6.948527 | 7.484438 | 8.490879 | 10.555023 | 12.997017 | 14.826671 |
| 47.06 | 4.328012 | 5.140987 | 6.991898 | 7.517043 | 8.486114 | 10.524289 | 13.077998 | 14.891097 |
| 47.16 | 4.302212 | 5.131371 | 6.965939 | 7.519008 | 8.435527 | 10.504603 | 13.029443 | 14.894990 |
| 47.26 | 4.319984 | 5.136491 | 6.974774 | 7.510067 | 8.470280 | 10.514969 | 13.045825 | 14.877113 |
| 47.36 | 4.324333 | 5.127715 | 6.965443 | 7.486267 | 8.478725 | 10.496899 | 13.028244 | 14.829820 |
| 47.46 | 4.299012 | 5.121524 | 6.947545 | 7.473493 | 8.428682 | 10.483737 | 12.994159 | 14.803824 |
| 47.56 | 4.301959 | 5.136086 | 6.976883 | 7.495232 | 8.434461 | 10.513545 | 13.049031 | 14.846885 |
| 47.66 | 4.321381 | 5.141696 | 6.957891 | 7.485814 | 8.472446 | 10.524911 | 13.013365 | 14.828067 |
| 47.76 | 4.318471 | 5.153586 | 6.945798 | 7.477820 | 8.466742 | 10.549251 | 12.990749 | 14.812233 |
| 47.86 | 4.310245 | 5.144088 | 6.982201 | 7.529299 | 8.450520 | 10.529693 | 13.058690 | 14.914038 |
| 47.96 | 4.324327 | 5.125609 | 6.962457 | 7.471426 | 8.477827 | 10.491493 | 13.021298 | 14.798875 |
| 48.06 | 4.327905 | 5.153577 | 6.945988 | 7.502261 | 8.485050 | 10.549001 | 12.990818 | 14.860318 |
| 48.16 | 4.323018 | 5.154719 | 6.947988 | 7.478915 | 8.475166 | 10.550962 | 12.994093 | 14.813546 |
| 48.26 | 4.299089 | 5.160543 | 7.003531 | 7.495960 | 8.428153 | 10.562753 | 13.097812 | 14.847126 |
| 48.36 | 4.332442 | 5.138020 | 6.944494 | 7.488468 | 8.493446 | 10.516537 | 12.987259 | 14.832125 |
| 48.46 | 4.302299 | 5.144835 | 6.965850 | 7.506967 | 8.434260 | 10.530371 | 13.027055 | 14.868601 |
| 48.56 | 4.319785 | 5.154584 | 6.995742 | 7.527378 | 8.468144 | 10.549832 | 13.082346 | 14.908331 |
| 48.66 | 4.316059 | 5.142759 | 6.990461 | 7.532560 | 8.460839 | 10.525629 | 13.072470 | 14.918595 |
| 48.76 | 4.312766 | 5.139365 | 6.966840 | 7.517444 | 8.454301 | 10.518579 | 13.028169 | 14.888509 |
| 48.86 | 4.321450 | 5.138483 | 6.986744 | 7.494936 | 8.471231 | 10.516657 | 13.065246 | 14.843769 |
| 48.96 | 4.304484 | 5.157777 | 7.003194 | 7.489591 | 8.437880 | 10.556030 | 13.095863 | 14.833020 |
| 49.06 | 4.313028 | 5.133964 | 6.979386 | 7.485655 | 8.454629 | 10.507294 | 13.051343 | 14.825223 |
| 49.16 | 4.313641 | 5.125762 | 6.961396 | 7.478740 | 8.455830 | 10.490507 | 13.017701 | 14.811528 |
| 49.26 | 4.298867 | 5.123203 | 6.986509 | 7.486021 | 8.426777 | 10.485154 | 13.064518 | 14.825785 |
| 49.36 | 4.322123 | 5.161840 | 6.973720 | 7.506129 | 8.472279 | 10.564125 | 13.040474 | 14.865460 |
| 49.46 | 4.322307 | 5.165235 | 6.998312 | 7.500924 | 8.472367 | 10.570733 | 13.086039 | 14.854676 |
| 49.56 | 4.324033 | 5.120054 | 6.986357 | 7.482819 | 8.475751 | 10.478268 | 13.063684 | 14.818821 |
| 49.66 | 4.298163 | 5.124363 | 6.996553 | 7.474932 | 8.424931 | 10.486949 | 13.082578 | 14.803005 |
| 49.76 | 4.310032 | 5.140084 | 6.950245 | 7.526656 | 8.448195 | 10.519122 | 12.995987 | 14.905438 |
| 49.86 | 4.329571 | 5.146814 | 6.975327 | 7.468896 | 8.486401 | 10.532779 | 13.042744 | 14.790889 |
| 49.96 | 4.330520 | 5.128151 | 6.959625 | 7.507975 | 8.488261 | 10.494585 | 13.013383 | 14.868279 |
| 50.06 | 4.323537 | 5.142472 | 6.956860 | 7.524276 | 8.474480 | 10.523776 | 13.008070 | 14.900396 |
| 50.16 | 4.333064 | 5.150003 | 6.958850 | 7.520196 | 8.492766 | 10.538707 | 13.011198 | 14.891638 |
| 50.26 | 4.327761 | 5.151028 | 6.974248 | 7.524649 | 8.482372 | 10.540806 | 13.039988 | 14.900455 |
| 50.36 | 4.311985 | 5.148884 | 7.001571 | 7.491826 | 8.451359 | 10.536302 | 13.090931 | 14.835294 |
| 50.46 | 4.307392 | 5.164941 | 7.004385 | 7.519277 | 8.442356 | 10.569160 | 13.096191 | 14.889654 |
| 50.56 | 4.300639 | 5.153059 | 6.987691 | 7.527783 | 8.429027 | 10.544729 | 13.064835 | 14.906333 |
| 50.66 | 4.331799 | 5.143886 | 6.986899 | 7.505786 | 8.490099 | 10.525957 | 13.063354 | 14.862775 |
| 50.76 | 4.317046 | 5.140013 | 7.002902 | 7.501620 | 8.461185 | 10.518034 | 13.093275 | 14.854525 |
| 50.86 | 4.324831 | 5.124453 | 6.960627 | 7.523312 | 8.476442 | 10.486191 | 13.014233 | 14.897480 |
| 50.96 | 4.305865 | 5.131846 | 6.965897 | 7.514491 | 8.438816 | 10.500755 | 13.023386 | 14.879212 |
| 51.06 | 4.304313 | 5.132537 | 6.988618 | 7.469328 | 8.435774 | 10.502169 | 13.065864 | 14.789784 |
| 51.16 | 4.304431 | 5.149111 | 7.000164 | 7.476691 | 8.436005 | 10.536082 | 13.087451 | 14.804364 |
| 51.26 | 4.318270 | 5.150597 | 6.959578 | 7.499922 | 8.463127 | 10.539123 | 13.011572 | 14.850362 |
| 51.36 | 4.320114 | 5.128489 | 6.999871 | 7.532065 | 8.466439 | 10.493511 | 13.086435 | 14.913477 |
| 51.46 | 4.329921 | 5.128154 | 6.969396 | 7.522220 | 8.485574 | 10.492722 | 13.029332 | 14.893835 |
| 51.56 | 4.328261 | 5.147753 | 6.965965 | 7.497320 | 8.482322 | 10.532823 | 13.022918 | 14.844534 |
| 51.66 | 4.305664 | 5.136856 | 6.959130 | 7.501167 | 8.438038 | 10.510527 | 13.010140 | 14.852151 |
| 51.76 | 4.322684 | 5.141125 | 7.002247 | 7.524884 | 8.471119 | 10.518923 | 13.090326 | 14.898632 |
| 51.86 | 4.302255 | 5.143556 | 6.950452 | 7.512242 | 8.430974 | 10.523758 | 12.993327 | 14.873404 |
| 51.96 | 4.301503 | 5.139269 | 6.996193 | 7.486630 | 8.429500 | 10.514988 | 13.078837 | 14.822696 |
| 52.06 | 4.298626 | 5.148276 | 6.963327 | 7.493424 | 8.423862 | 10.533415 | 13.017396 | 14.836148 |
| 52.16 | 4.324949 | 5.121656 | 6.987521 | 7.469560 | 8.475353 | 10.478835 | 13.062482 | 14.788736 |
| 52.26 | 4.326366 | 5.121517 | 6.972794 | 7.488698 | 8.478129 | 10.478550 | 13.034951 | 14.826627 |
| 52.36 | 4.315668 | 5.141394 | 7.000457 | 7.484685 | 8.457166 | 10.519219 | 13.086663 | 14.818681 |
| 52.46 | 4.303922 | 5.134209 | 7.003159 | 7.484942 | 8.433753 | 10.504028 | 13.091103 | 14.818498 |
| 52.56 | 4.304991 | 5.165575 | 6.963021 | 7.470976 | 8.435765 | 10.568094 | 13.015943 | 14.790701 |
| 52.66 | 4.302898 | 5.136648 | 6.994749 | 7.497688 | 8.431664 | 10.508915 | 13.075253 | 14.843584 |
| 52.76 | 4.326496 | 5.138290 | 7.002631 | 7.476552 | 8.477905 | 10.512273 | 13.089986 | 14.801741 |
| 52.86 | 4.312828 | 5.149245 | 6.945294 | 7.534585 | 8.451121 | 10.534686 | 12.982807 | 14.916631 |
| 52.96 | 4.334841 | 5.127642 | 6.958565 | 7.523058 | 8.494163 | 10.490373 | 13.007471 | 14.893648 |
| 53.06 | 4.320720 | 5.155911 | 7.004582 | 7.515510 | 8.466190 | 10.547831 | 13.093023 | 14.878173 |
| 53.16 | 4.319717 | 5.130565 | 6.996632 | 7.512915 | 8.464132 | 10.495863 | 13.078018 | 14.872872 |
| 53.26 | 4.334827 | 5.141588 | 7.002713 | 7.522256 | 8.493739 | 10.518414 | 13.089385 | 14.891363 |
| 53.36 | 4.300808 | 5.129557 | 6.957984 | 7.500071 | 8.427081 | 10.493800 | 13.005777 | 14.847446 |
| 53.46 | 4.330448 | 5.136014 | 6.971663 | 7.482633 | 8.485064 | 10.506895 | 13.031202 | 14.812761 |
| 53.56 | 4.325719 | 5.121328 | 6.993448 | 7.534330 | 8.475800 | 10.476852 | 13.071922 | 14.915102 |
| 53.66 | 4.307248 | 5.125993 | 6.984649 | 7.527503 | 8.439608 | 10.486395 | 13.055476 | 14.901586 |
| 53.76 | 4.302536 | 5.142393 | 6.947392 | 7.534697 | 8.430281 | 10.519828 | 12.985693 | 14.915663 |
| 53.86 | 4.335746 | 5.156206 | 6.996635 | 7.477969 | 8.495353 | 10.548086 | 13.077734 | 14.803365 |
| 53.96 | 4.306218 | 5.150653 | 6.990885 | 7.508285 | 8.437497 | 10.536726 | 13.066988 | 14.863379 |
| 54.06 | 4.308197 | 5.131667 | 6.973146 | 7.526825 | 8.441374 | 10.497886 | 13.033832 | 14.900080 |
| 54.16 | 4.332399 | 5.139288 | 6.985451 | 7.529243 | 8.488492 | 10.513102 | 13.056365 | 14.904335 |
| 54.26 | 4.303319 | 5.135262 | 6.952626 | 7.510164 | 8.431817 | 10.505240 | 12.995476 | 14.867098 |
| 54.36 | 4.306673 | 5.128007 | 6.978693 | 7.508137 | 8.437984 | 10.489898 | 13.043576 | 14.862375 |
| 54.46 | 4.316619 | 5.133939 | 6.991856 | 7.478133 | 8.457472 | 10.502031 | 13.068178 | 14.802982 |
| 54.56 | 4.312816 | 5.149154 | 6.957739 | 7.511084 | 8.450021 | 10.533156 | 13.004411 | 14.868210 |
| 54.66 | 4.326398 | 5.139000 | 6.945282 | 7.497455 | 8.476631 | 10.512384 | 12.981128 | 14.841230 |
| 54.76 | 4.316953 | 5.153282 | 6.970227 | 7.513938 | 8.458032 | 10.541483 | 13.027608 | 14.873695 |
| 54.86 | 4.320915 | 5.131897 | 6.985419 | 7.493141 | 8.465796 | 10.497738 | 13.056003 | 14.832527 |
| 54.96 | 4.312652 | 5.133696 | 6.977964 | 7.525897 | 8.449512 | 10.501302 | 13.041926 | 14.897203 |
| 55.06 | 4.334918 | 5.139873 | 6.989593 | 7.527951 | 8.493136 | 10.513938 | 13.063660 | 14.901270 |
| 55.16 | 4.307677 | 5.155560 | 7.004567 | 7.532320 | 8.439766 | 10.546028 | 13.091647 | 14.909916 |
| 55.26 | 4.312939 | 5.151825 | 6.978374 | 7.501642 | 8.449982 | 10.538271 | 13.042548 | 14.849028 |
| 55.36 | 4.303876 | 5.157661 | 6.963846 | 7.484515 | 8.431954 | 10.549870 | 13.014976 | 14.814649 |
| 55.46 | 4.315753 | 5.161936 | 7.002090 | 7.512047 | 8.455224 | 10.558614 | 13.086453 | 14.869146 |
| 55.56 | 4.302187 | 5.127027 | 6.986537 | 7.520970 | 8.428646 | 10.487209 | 13.057385 | 14.886807 |
| 55.66 | 4.298737 | 5.157499 | 6.989871 | 7.472781 | 8.421804 | 10.549435 | 13.063487 | 14.791276 |
| 55.76 | 4.313500 | 5.145547 | 7.005470 | 7.499244 | 8.450725 | 10.524987 | 13.092641 | 14.843657 |
| 55.86 | 4.305645 | 5.150055 | 6.960296 | 7.478680 | 8.435336 | 10.534207 | 13.008213 | 14.802954 |
| 55.96 | 4.330971 | 5.146940 | 6.949815 | 7.483878 | 8.484953 | 10.527836 | 12.988626 | 14.813243 |
| 56.06 | 4.310170 | 5.125734 | 6.998150 | 7.515035 | 8.444108 | 10.484345 | 13.078816 | 14.874750 |
| 56.16 | 4.300573 | 5.139809 | 6.964846 | 7.515667 | 8.425307 | 10.513134 | 13.016575 | 14.876000 |
| 56.26 | 4.307768 | 5.153203 | 6.963513 | 7.536472 | 8.439009 | 10.540038 | 13.013475 | 14.916483 |
| 56.36 | 4.313740 | 5.146233 | 6.986550 | 7.521780 | 8.450708 | 10.525781 | 13.056526 | 14.887405 |
| 56.46 | 4.308957 | 5.147729 | 6.949408 | 7.478015 | 8.441244 | 10.528727 | 12.986973 | 14.800620 |
| 56.56 | 4.333382 | 5.148779 | 6.959147 | 7.516422 | 8.489009 | 10.530769 | 13.005044 | 14.876487 |
| 56.66 | 4.324129 | 5.140588 | 6.992007 | 7.492349 | 8.470882 | 10.514016 | 13.066451 | 14.828844 |
| 56.76 | 4.333281 | 5.133708 | 6.949350 | 7.523139 | 8.488698 | 10.499806 | 12.986564 | 14.889586 |
| 56.86 | 4.316713 | 5.144086 | 6.984064 | 7.535531 | 8.456244 | 10.521033 | 13.051435 | 14.914111 |
| 56.96 | 4.320343 | 5.130484 | 6.953144 | 7.506190 | 8.463262 | 10.493096 | 12.993510 | 14.855876 |
| 57.06 | 4.314714 | 5.146892 | 6.949959 | 7.481640 | 8.452234 | 10.526654 | 12.987558 | 14.807288 |
| 57.16 | 4.328446 | 5.126028 | 6.986272 | 7.505201 | 8.478678 | 10.483418 | 13.054715 | 14.853121 |
| 57.26 | 4.298532 | 5.142235 | 6.958385 | 7.502881 | 8.420081 | 10.516565 | 13.002604 | 14.848528 |
| 57.36 | 4.298270 | 5.142758 | 6.950300 | 7.493113 | 8.419569 | 10.517633 | 12.987496 | 14.829197 |
| 57.46 | 4.327290 | 5.126640 | 6.946653 | 7.498301 | 8.476328 | 10.484566 | 12.980552 | 14.839318 |
| 57.56 | 4.311337 | 5.134197 | 6.982661 | 7.485096 | 8.445081 | 10.500020 | 13.047836 | 14.813184 |
| 57.66 | 4.326724 | 5.142808 | 6.955321 | 7.479814 | 8.475221 | 10.517630 | 12.996750 | 14.802730 |
| 57.76 | 4.331387 | 5.123133 | 6.967287 | 7.535809 | 8.484260 | 10.477278 | 13.018966 | 14.913382 |
| 57.86 | 4.303939 | 5.148439 | 6.984080 | 7.502107 | 8.430496 | 10.529031 | 13.050344 | 14.846686 |
| 57.96 | 4.300375 | 5.162194 | 6.978615 | 7.483059 | 8.423422 | 10.557046 | 13.039990 | 14.808826 |
| 58.06 | 4.301791 | 5.164637 | 6.993840 | 7.525703 | 8.426196 | 10.562041 | 13.068439 | 14.893218 |
| 58.16 | 4.328203 | 5.159668 | 6.997911 | 7.511971 | 8.477932 | 10.551879 | 13.076046 | 14.866043 |
| 58.26 | 4.330021 | 5.157990 | 6.955682 | 7.534687 | 8.481398 | 10.548332 | 12.996994 | 14.910832 |
| 58.36 | 4.305880 | 5.135666 | 6.944728 | 7.480211 | 8.434113 | 10.502678 | 12.976527 | 14.803028 |
| 58.46 | 4.310398 | 5.128765 | 6.973294 | 7.527526 | 8.442879 | 10.488461 | 13.029774 | 14.896515 |
| 58.56 | 4.324722 | 5.137183 | 6.961205 | 7.517935 | 8.470936 | 10.505677 | 13.007185 | 14.877534 |
| 58.66 | 4.311743 | 5.151238 | 6.993820 | 7.495109 | 8.445401 | 10.534279 | 13.067954 | 14.832168 |
| 58.76 | 4.310295 | 5.166839 | 6.986689 | 7.470527 | 8.442472 | 10.566067 | 13.054487 | 14.783359 |
| 58.86 | 4.308983 | 5.166933 | 6.950736 | 7.517682 | 8.439601 | 10.565883 | 12.986845 | 14.876141 |
| 58.96 | 4.329017 | 5.161028 | 6.982884 | 7.520731 | 8.478839 | 10.553807 | 13.046912 | 14.882175 |
| 59.06 | 4.299783 | 5.130452 | 6.983434 | 7.471905 | 8.421489 | 10.491168 | 13.047796 | 14.785396 |
| 59.16 | 4.311575 | 5.157874 | 6.977154 | 7.513868 | 8.444500 | 10.547137 | 13.035932 | 14.868284 |
| 59.26 | 4.307987 | 5.153905 | 6.976270 | 7.483398 | 8.437474 | 10.539021 | 13.034282 | 14.807990 |
| 59.36 | 4.304651 | 5.143083 | 6.975988 | 7.485470 | 8.430575 | 10.516438 | 13.033191 | 14.811451 |
| 59.46 | 4.329438 | 5.149376 | 6.957793 | 7.500822 | 8.479121 | 10.529305 | 12.999199 | 14.841829 |
| 59.56 | 4.324202 | 5.147476 | 6.987800 | 7.513285 | 8.468866 | 10.525419 | 13.055260 | 14.866488 |
| 59.66 | 4.301835 | 5.155841 | 6.982894 | 7.511907 | 8.424969 | 10.542409 | 13.045950 | 14.863598 |
| 59.76 | 4.317685 | 5.152697 | 6.963069 | 7.516519 | 8.455708 | 10.535605 | 13.008448 | 14.872192 |
| 59.86 | 4.300629 | 5.151011 | 6.948221 | 7.512432 | 8.422305 | 10.532156 | 12.980708 | 14.864106 |
| 59.96 | 4.336313 | 5.137736 | 6.986533 | 7.479338 | 8.492094 | 10.504899 | 13.052139 | 14.798464 |
| 60.06 | 4.311732 | 5.136186 | 6.951562 | 7.533237 | 8.443957 | 10.501728 | 12.986807 | 14.905106 |
| 60.16 | 4.312395 | 5.130511 | 6.994754 | 7.505281 | 8.445255 | 10.490125 | 13.067497 | 14.849793 |
| 60.26 | 4.301868 | 5.131166 | 7.004467 | 7.506032 | 8.424338 | 10.491090 | 13.085175 | 14.850749 |
| 60.36 | 4.337306 | 5.135930 | 6.958791 | 7.473746 | 8.493644 | 10.500714 | 12.999705 | 14.786708 |
| 60.46 | 4.335843 | 5.144861 | 6.959463 | 7.529424 | 8.490778 | 10.518974 | 13.000960 | 14.896867 |
| 60.56 | 4.152560 | 4.947804 | 6.716095 | 7.185073 | 8.387027 | 10.433510 | 12.940013 | 14.661640 |
| 60.66 | 2.727023 | 3.255022 | 4.408156 | 4.760889 | 6.614002 | 8.242431 | 10.199015 | 11.666021 |
| 60.76 | 1.284590 | 1.535967 | 2.086419 | 2.247363 | 3.291043 | 4.108435 | 5.099131 | 5.817029 |
| 60.86 | 0.730354 | 0.863181 | 1.180832 | 1.260386 | 1.643914 | 2.028491 | 2.535475 | 2.866213 |
| 60.96 | 0.501778 | 0.597888 | 0.811259 | 0.874560 | 1.011348 | 1.258156 | 1.559819 | 1.780892 |
| 61.06 | 0.379829 | 0.452617 | 0.617065 | 0.665161 | 0.694566 | 0.864137 | 1.076422 | 1.228886 |
| 61.16 | 0.310320 | 0.370272 | 0.500265 | 0.538860 | 0.506111 | 0.630496 | 0.778327 | 0.887915 |
| 61.26 | 0.267109 | 0.318240 | 0.431028 | 0.460539 | 0.386249 | 0.480463 | 0.594580 | 0.672830 |
| 61.36 | 0.236494 | 0.282541 | 0.382751 | 0.411897 | 0.307512 | 0.383574 | 0.474770 | 0.541114 |
| 61.46 | 0.216504 | 0.257312 | 0.348201 | 0.375419 | 0.256111 | 0.317796 | 0.392933 | 0.448682 |
| 61.56 | 0.199352 | 0.236419 | 0.319962 | 0.345939 | 0.222677 | 0.275717 | 0.340941 | 0.390403 |
| 61.66 | 0.188670 | 0.224221 | 0.303050 | 0.325561 | 0.198348 | 0.246108 | 0.303923 | 0.345792 |
| 61.76 | 0.180074 | 0.214056 | 0.290133 | 0.314308 | 0.177782 | 0.220643 | 0.273250 | 0.313511 |
| 61.86 | 0.174595 | 0.208055 | 0.281782 | 0.300853 | 0.163829 | 0.203827 | 0.252230 | 0.285214 |
| 61.96 | 0.168160 | 0.199835 | 0.272352 | 0.291675 | 0.153036 | 0.189874 | 0.236443 | 0.268181 |
| 62.06 | 0.161285 | 0.192050 | 0.260689 | 0.282366 | 0.141244 | 0.175596 | 0.217783 | 0.249831 |
| 62.16 | 0.157064 | 0.187341 | 0.252504 | 0.272480 | 0.135551 | 0.168805 | 0.207884 | 0.237586 |
| 62.26 | 0.153566 | 0.182619 | 0.246583 | 0.266258 | 0.127690 | 0.158538 | 0.195592 | 0.223678 |
| 62.36 | 0.148448 | 0.177696 | 0.240245 | 0.258299 | 0.122169 | 0.152683 | 0.188611 | 0.214768 |
| 62.46 | 0.145080 | 0.173468 | 0.235588 | 0.252719 | 0.117127 | 0.146216 | 0.181438 | 0.206133 |
| 62.56 | 0.142292 | 0.169842 | 0.230011 | 0.247985 | 0.112647 | 0.140381 | 0.173705 | 0.198345 |
| 62.66 | 0.139639 | 0.167219 | 0.227227 | 0.242515 | 0.108000 | 0.135030 | 0.167650 | 0.189503 |
| 62.76 | 0.138381 | 0.164028 | 0.222287 | 0.239306 | 0.105259 | 0.130265 | 0.161296 | 0.183907 |
| 62.86 | 0.136374 | 0.162341 | 0.219005 | 0.236908 | 0.102279 | 0.127118 | 0.156688 | 0.179512 |
| 62.96 | 0.132927 | 0.158914 | 0.216171 | 0.232673 | 0.098950 | 0.123507 | 0.153506 | 0.174987 |
| 63.06 | 0.131287 | 0.155705 | 0.212280 | 0.228698 | 0.096991 | 0.120099 | 0.149605 | 0.170700 |
| 63.16 | 0.128537 | 0.153872 | 0.207583 | 0.225072 | 0.094144 | 0.117666 | 0.145039 | 0.166550 |
| 63.26 | 0.127377 | 0.151615 | 0.206470 | 0.221941 | 0.091928 | 0.114241 | 0.142147 | 0.161827 |
| 63.36 | 0.125170 | 0.149124 | 0.203122 | 0.218486 | 0.089446 | 0.111259 | 0.138467 | 0.157741 |
| 63.46 | 0.123774 | 0.146836 | 0.199691 | 0.214863 | 0.087996 | 0.108992 | 0.135431 | 0.154331 |
| 63.56 | 0.121866 | 0.145187 | 0.197251 | 0.211867 | 0.086168 | 0.107181 | 0.133048 | 0.151351 |
| 63.66 | 0.120000 | 0.143025 | 0.194502 | 0.209689 | 0.084553 | 0.105217 | 0.130736 | 0.149273 |
| 63.76 | 0.118910 | 0.142025 | 0.192844 | 0.206922 | 0.082901 | 0.103379 | 0.128255 | 0.145750 |
| 63.86 | 0.117784 | 0.139474 | 0.189218 | 0.204319 | 0.081693 | 0.100999 | 0.125195 | 0.143175 |
| 63.96 | 0.116378 | 0.138404 | 0.187361 | 0.200842 | 0.080367 | 0.099789 | 0.123428 | 0.140127 |
| 64.06 | 0.114823 | 0.136773 | 0.185581 | 0.198531 | 0.079139 | 0.098422 | 0.122018 | 0.138246 |
| 64.16 | 0.113044 | 0.135676 | 0.182804 | 0.197371 | 0.077443 | 0.097043 | 0.119466 | 0.136609 |
| 64.26 | 0.112108 | 0.133559 | 0.181299 | 0.195985 | 0.076424 | 0.095059 | 0.117900 | 0.134982 |
| 64.36 | 0.110815 | 0.132304 | 0.179532 | 0.192345 | 0.075480 | 0.094087 | 0.116653 | 0.132364 |
| 64.46 | 0.109972 | 0.130932 | 0.178449 | 0.191630 | 0.074403 | 0.092486 | 0.115172 | 0.130987 |
| 64.56 | 0.109913 | 0.130458 | 0.176787 | 0.189693 | 0.073943 | 0.091631 | 0.113454 | 0.128930 |
| 64.66 | 0.108294 | 0.128554 | 0.174958 | 0.187595 | 0.072563 | 0.089935 | 0.111834 | 0.126997 |
| 64.76 | 0.107481 | 0.127820 | 0.174090 | 0.187448 | 0.071616 | 0.088921 | 0.110657 | 0.126188 |
| 64.86 | 0.107229 | 0.127849 | 0.172318 | 0.186342 | 0.071285 | 0.088738 | 0.109280 | 0.125158 |
| 64.96 | 0.106385 | 0.127106 | 0.172276 | 0.186088 | 0.069999 | 0.087317 | 0.108133 | 0.123704 |
| 65.06 | 0.106161 | 0.125984 | 0.171695 | 0.184939 | 0.069521 | 0.086137 | 0.107259 | 0.122359 |
| 65.16 | 0.105895 | 0.125628 | 0.169908 | 0.183813 | 0.068994 | 0.085456 | 0.105602 | 0.120995 |
| 65.26 | 0.104628 | 0.124758 | 0.169090 | 0.182151 | 0.067919 | 0.084554 | 0.104709 | 0.119462 |
| 65.36 | 0.104017 | 0.123983 | 0.167897 | 0.180651 | 0.067356 | 0.083822 | 0.103715 | 0.118187 |
| 65.46 | 0.103273 | 0.123377 | 0.166902 | 0.179410 | 0.066732 | 0.083236 | 0.102882 | 0.117127 |
| 65.56 | 0.103033 | 0.122781 | 0.165736 | 0.178440 | 0.066440 | 0.082663 | 0.101952 | 0.116253 |
| 65.66 | 0.101898 | 0.121034 | 0.164312 | 0.176354 | 0.065629 | 0.081389 | 0.100955 | 0.114756 |
| 65.76 | 0.101187 | 0.121323 | 0.163526 | 0.176127 | 0.065209 | 0.081630 | 0.100529 | 0.114674 |
| 65.86 | 0.101027 | 0.120205 | 0.163149 | 0.175364 | 0.065203 | 0.080998 | 0.100447 | 0.114348 |
| 65.96 | 0.100180 | 0.120182 | 0.162749 | 0.174678 | 0.064288 | 0.080522 | 0.099630 | 0.113251 |
| 66.06 | 0.099706 | 0.118933 | 0.161240 | 0.173422 | 0.063929 | 0.079617 | 0.098622 | 0.112341 |
| 66.16 | 0.099179 | 0.118041 | 0.160533 | 0.173064 | 0.063704 | 0.079159 | 0.098364 | 0.112308 |
| 66.26 | 0.099346 | 0.117642 | 0.160215 | 0.171613 | 0.063627 | 0.078665 | 0.097887 | 0.111046 |
| 66.36 | 0.098065 | 0.116663 | 0.159237 | 0.171323 | 0.062848 | 0.078062 | 0.097353 | 0.110931 |
| 66.46 | 0.097337 | 0.116753 | 0.157655 | 0.169783 | 0.062294 | 0.078013 | 0.096251 | 0.109781 |
| 66.56 | 0.097144 | 0.115911 | 0.156522 | 0.168687 | 0.062097 | 0.077358 | 0.095446 | 0.108943 |
| 66.66 | 0.096710 | 0.115447 | 0.156148 | 0.168316 | 0.061932 | 0.077188 | 0.095391 | 0.108901 |
| 66.76 | 0.096302 | 0.114400 | 0.155404 | 0.166726 | 0.061519 | 0.076300 | 0.094703 | 0.107606 |
| 66.86 | 0.095717 | 0.113965 | 0.154635 | 0.167131 | 0.061143 | 0.076007 | 0.094230 | 0.107863 |
| 66.96 | 0.095553 | 0.113573 | 0.154652 | 0.165457 | 0.060963 | 0.075652 | 0.094124 | 0.106651 |
| 67.06 | 0.094704 | 0.113331 | 0.153281 | 0.164854 | 0.060442 | 0.075517 | 0.093323 | 0.106299 |
| 67.16 | 0.094812 | 0.112374 | 0.152449 | 0.163635 | 0.060247 | 0.074553 | 0.092411 | 0.105054 |
| 67.26 | 0.094392 | 0.112632 | 0.152364 | 0.163900 | 0.059789 | 0.074486 | 0.092066 | 0.104889 |
| 67.36 | 0.093642 | 0.111496 | 0.151087 | 0.163410 | 0.059233 | 0.073634 | 0.091168 | 0.104431 |
| 67.46 | 0.093057 | 0.110984 | 0.150256 | 0.162703 | 0.058876 | 0.073312 | 0.090688 | 0.104003 |
| 67.56 | 0.092790 | 0.111141 | 0.149535 | 0.162070 | 0.058720 | 0.073432 | 0.090272 | 0.103621 |
| 67.66 | 0.092606 | 0.110546 | 0.150045 | 0.160740 | 0.058430 | 0.072823 | 0.090312 | 0.102467 |
| 67.76 | 0.092171 | 0.110170 | 0.149117 | 0.160740 | 0.058169 | 0.072591 | 0.089773 | 0.102489 |
| 67.86 | 0.091914 | 0.109801 | 0.148041 | 0.159998 | 0.058015 | 0.072358 | 0.089138 | 0.102030 |
| 67.96 | 0.091390 | 0.109204 | 0.147515 | 0.158202 | 0.057696 | 0.071980 | 0.088840 | 0.100906 |
| 68.06 | 0.091404 | 0.108319 | 0.147732 | 0.157877 | 0.057623 | 0.071295 | 0.088844 | 0.100555 |
| 68.16 | 0.091158 | 0.107935 | 0.146543 | 0.157731 | 0.057289 | 0.070821 | 0.087855 | 0.100151 |
| 68.26 | 0.090813 | 0.108206 | 0.146608 | 0.157823 | 0.057174 | 0.071126 | 0.088051 | 0.100389 |
| 68.36 | 0.089631 | 0.107140 | 0.145659 | 0.156536 | 0.056514 | 0.070531 | 0.087611 | 0.099718 |
| 68.46 | 0.089855 | 0.107011 | 0.145657 | 0.156408 | 0.056587 | 0.070361 | 0.087505 | 0.099516 |
| 68.56 | 0.089462 | 0.106341 | 0.144367 | 0.156287 | 0.056257 | 0.069817 | 0.086602 | 0.099293 |
| 68.66 | 0.089385 | 0.106557 | 0.143972 | 0.154964 | 0.056212 | 0.069964 | 0.086371 | 0.098459 |
| 68.76 | 0.088850 | 0.106367 | 0.143796 | 0.155126 | 0.055883 | 0.069848 | 0.086277 | 0.098575 |
| 68.86 | 0.088415 | 0.105382 | 0.143754 | 0.154020 | 0.055598 | 0.069188 | 0.086235 | 0.097853 |
| 68.96 | 0.088554 | 0.105886 | 0.143570 | 0.153739 | 0.055618 | 0.069434 | 0.086019 | 0.097554 |
| 69.06 | 0.088406 | 0.104949 | 0.142338 | 0.153692 | 0.055532 | 0.068828 | 0.085292 | 0.097537 |
| 69.16 | 0.088307 | 0.104839 | 0.141933 | 0.153480 | 0.055477 | 0.068765 | 0.085060 | 0.097416 |
| 69.26 | 0.087694 | 0.104039 | 0.141979 | 0.153085 | 0.055081 | 0.068226 | 0.085071 | 0.097145 |
| 69.36 | 0.087645 | 0.103832 | 0.140627 | 0.151366 | 0.055057 | 0.068100 | 0.084272 | 0.096068 |
| 69.46 | 0.087339 | 0.104071 | 0.140484 | 0.151022 | 0.054891 | 0.068289 | 0.084226 | 0.095895 |
| 69.56 | 0.086541 | 0.103442 | 0.140192 | 0.151248 | 0.054303 | 0.067768 | 0.083917 | 0.095885 |
| 69.66 | 0.086361 | 0.102988 | 0.140317 | 0.150880 | 0.054178 | 0.067456 | 0.083975 | 0.095632 |
| 69.76 | 0.086337 | 0.103291 | 0.139449 | 0.150548 | 0.054167 | 0.067659 | 0.083460 | 0.095427 |
| 69.86 | 0.086191 | 0.102767 | 0.139677 | 0.149512 | 0.053988 | 0.067208 | 0.083462 | 0.094618 |
| 69.96 | 0.086183 | 0.102776 | 0.139145 | 0.150241 | 0.053987 | 0.067217 | 0.083149 | 0.095085 |
| 70.06 | 0.086286 | 0.102570 | 0.139393 | 0.149184 | 0.053982 | 0.066997 | 0.083191 | 0.094295 |
| 70.16 | 0.085767 | 0.101909 | 0.138593 | 0.149155 | 0.053552 | 0.066434 | 0.082550 | 0.094091 |
| 70.26 | 0.085257 | 0.101915 | 0.138360 | 0.149219 | 0.053239 | 0.066445 | 0.082421 | 0.094142 |
| 70.36 | 0.085623 | 0.101323 | 0.137713 | 0.148911 | 0.053380 | 0.065950 | 0.081900 | 0.093793 |
| 70.46 | 0.085296 | 0.101434 | 0.137313 | 0.148096 | 0.053181 | 0.066030 | 0.081671 | 0.093289 |
| 70.56 | 0.084552 | 0.100653 | 0.137361 | 0.147745 | 0.052833 | 0.065665 | 0.081878 | 0.093272 |
| 70.66 | 0.084265 | 0.100542 | 0.136447 | 0.147097 | 0.052638 | 0.065574 | 0.081310 | 0.092836 |
| 70.76 | 0.084687 | 0.100177 | 0.137008 | 0.146839 | 0.052814 | 0.065227 | 0.081509 | 0.092519 |
| 70.86 | 0.084327 | 0.100289 | 0.136534 | 0.146310 | 0.052501 | 0.065190 | 0.081091 | 0.092031 |
| 70.96 | 0.084330 | 0.100124 | 0.135836 | 0.145746 | 0.052509 | 0.065090 | 0.080684 | 0.091686 |
| 71.06 | 0.083766 | 0.099766 | 0.135266 | 0.145685 | 0.052160 | 0.064861 | 0.080350 | 0.091653 |
| 71.16 | 0.083704 | 0.100044 | 0.134959 | 0.145898 | 0.052106 | 0.065022 | 0.080144 | 0.091760 |
| 71.26 | 0.083675 | 0.099410 | 0.134115 | 0.145067 | 0.052112 | 0.064640 | 0.079680 | 0.091280 |
| 71.36 | 0.083182 | 0.099261 | 0.133857 | 0.144889 | 0.051808 | 0.064547 | 0.079531 | 0.091173 |
| 71.46 | 0.083238 | 0.098951 | 0.133968 | 0.143719 | 0.051755 | 0.064235 | 0.079461 | 0.090282 |
| 71.56 | 0.083021 | 0.099126 | 0.134547 | 0.143858 | 0.051532 | 0.064239 | 0.079668 | 0.090215 |
| 71.66 | 0.082621 | 0.098016 | 0.132991 | 0.143222 | 0.051379 | 0.063638 | 0.078894 | 0.089984 |
| 71.76 | 0.082649 | 0.098060 | 0.132976 | 0.142913 | 0.051290 | 0.063535 | 0.078721 | 0.089603 |
| 71.86 | 0.082460 | 0.098308 | 0.133425 | 0.142996 | 0.051084 | 0.063585 | 0.078850 | 0.089500 |
| 71.96 | 0.082465 | 0.097723 | 0.132130 | 0.142275 | 0.051108 | 0.063233 | 0.078117 | 0.089085 |
| 72.06 | 0.081860 | 0.097908 | 0.133039 | 0.142519 | 0.050645 | 0.063242 | 0.078517 | 0.089082 |
| 72.16 | 0.081645 | 0.097438 | 0.132072 | 0.142469 | 0.050514 | 0.062941 | 0.077950 | 0.089055 |
| 72.26 | 0.081826 | 0.096924 | 0.131857 | 0.141732 | 0.050610 | 0.062589 | 0.077798 | 0.088566 |
| 72.36 | 0.081540 | 0.096856 | 0.131503 | 0.142080 | 0.050344 | 0.062435 | 0.077453 | 0.088627 |
| 72.46 | 0.081183 | 0.097353 | 0.131583 | 0.141407 | 0.050125 | 0.062758 | 0.077503 | 0.088211 |
| 72.56 | 0.081435 | 0.096385 | 0.131821 | 0.140885 | 0.050283 | 0.062136 | 0.077646 | 0.087889 |
| 72.66 | 0.081018 | 0.097065 | 0.130908 | 0.141516 | 0.049935 | 0.062461 | 0.076969 | 0.088122 |
| 72.76 | 0.080784 | 0.096653 | 0.131092 | 0.141419 | 0.049793 | 0.062198 | 0.077079 | 0.088065 |
| 72.86 | 0.080978 | 0.096240 | 0.130922 | 0.140113 | 0.049932 | 0.061958 | 0.077011 | 0.087288 |
| 72.96 | 0.081061 | 0.096174 | 0.129951 | 0.139829 | 0.049967 | 0.061895 | 0.076415 | 0.087082 |
| 73.06 | 0.080368 | 0.095850 | 0.130588 | 0.139851 | 0.049542 | 0.061688 | 0.076792 | 0.087099 |
| 73.16 | 0.080105 | 0.095692 | 0.129606 | 0.140325 | 0.049382 | 0.061589 | 0.076218 | 0.087398 |
| 73.26 | 0.080211 | 0.096095 | 0.129472 | 0.139595 | 0.049448 | 0.061851 | 0.076142 | 0.086946 |
| 73.36 | 0.080306 | 0.095350 | 0.129984 | 0.138757 | 0.049509 | 0.061374 | 0.076446 | 0.086428 |
| 73.46 | 0.080283 | 0.095322 | 0.128991 | 0.139116 | 0.049497 | 0.061358 | 0.075865 | 0.086654 |
| 73.56 | 0.079979 | 0.095151 | 0.128941 | 0.138856 | 0.049218 | 0.061135 | 0.075695 | 0.086333 |
| 73.66 | 0.079774 | 0.095088 | 0.129354 | 0.138864 | 0.049094 | 0.061097 | 0.075940 | 0.086340 |
| 73.76 | 0.079926 | 0.095257 | 0.128204 | 0.138666 | 0.049189 | 0.061207 | 0.075268 | 0.086221 |
| 73.86 | 0.079400 | 0.094747 | 0.128811 | 0.138196 | 0.048757 | 0.060744 | 0.075456 | 0.085737 |
| 73.96 | 0.079606 | 0.094729 | 0.127783 | 0.137648 | 0.048996 | 0.060873 | 0.075026 | 0.085594 |
| 74.06 | 0.079532 | 0.094459 | 0.127996 | 0.138159 | 0.048952 | 0.060701 | 0.075154 | 0.085915 |
| 74.16 | 0.078986 | 0.093902 | 0.127859 | 0.137781 | 0.048708 | 0.060458 | 0.075216 | 0.085843 |
| 74.26 | 0.078627 | 0.093991 | 0.127011 | 0.137596 | 0.048489 | 0.060518 | 0.074720 | 0.085731 |
| 74.36 | 0.078749 | 0.093572 | 0.126744 | 0.137302 | 0.048566 | 0.060250 | 0.074566 | 0.085551 |
| 74.46 | 0.078561 | 0.093873 | 0.127453 | 0.137000 | 0.048361 | 0.060333 | 0.074845 | 0.085206 |
| 74.56 | 0.078532 | 0.093931 | 0.127389 | 0.136655 | 0.048252 | 0.060257 | 0.074667 | 0.084831 |
| 74.66 | 0.078733 | 0.093335 | 0.126460 | 0.136498 | 0.048469 | 0.059990 | 0.074265 | 0.084897 |
| 74.76 | 0.078312 | 0.092850 | 0.126759 | 0.136374 | 0.048321 | 0.059816 | 0.074613 | 0.085015 |
| 74.86 | 0.078320 | 0.093095 | 0.126950 | 0.135813 | 0.048217 | 0.059838 | 0.074556 | 0.084474 |
| 74.96 | 0.078292 | 0.093103 | 0.125753 | 0.135838 | 0.048201 | 0.059845 | 0.073855 | 0.084493 |
| 75.06 | 0.078210 | 0.093174 | 0.126477 | 0.135111 | 0.048243 | 0.060006 | 0.074424 | 0.084203 |
| 75.16 | 0.077609 | 0.092484 | 0.125233 | 0.135047 | 0.047875 | 0.059565 | 0.073695 | 0.084166 |
| 75.26 | 0.077661 | 0.092465 | 0.125438 | 0.135238 | 0.047909 | 0.059555 | 0.073819 | 0.084289 |
| 75.36 | 0.077265 | 0.092485 | 0.125701 | 0.134892 | 0.047666 | 0.059570 | 0.073976 | 0.084076 |
| 75.46 | 0.077222 | 0.091932 | 0.125039 | 0.134346 | 0.047733 | 0.059329 | 0.073730 | 0.083899 |
| 75.56 | 0.077487 | 0.091850 | 0.125232 | 0.134335 | 0.047898 | 0.059279 | 0.073847 | 0.083896 |
| 75.66 | 0.077173 | 0.092118 | 0.124825 | 0.134491 | 0.047613 | 0.059338 | 0.073467 | 0.083833 |
| 75.76 | 0.076807 | 0.091494 | 0.124342 | 0.134224 | 0.047408 | 0.058961 | 0.073214 | 0.083703 |
| 75.86 | 0.076911 | 0.091721 | 0.124685 | 0.133140 | 0.047456 | 0.059088 | 0.073391 | 0.082998 |
| 75.96 | 0.076542 | 0.091329 | 0.123907 | 0.132944 | 0.047321 | 0.058951 | 0.073076 | 0.083039 |
| 76.06 | 0.076897 | 0.091616 | 0.124078 | 0.133207 | 0.047543 | 0.059138 | 0.073180 | 0.083207 |
| 76.16 | 0.076333 | 0.090864 | 0.123589 | 0.133345 | 0.047103 | 0.058540 | 0.072752 | 0.083133 |
| 76.26 | 0.076331 | 0.091209 | 0.124038 | 0.133032 | 0.047194 | 0.058878 | 0.073160 | 0.083102 |
| 76.36 | 0.076773 | 0.090709 | 0.123270 | 0.132739 | 0.047377 | 0.058443 | 0.072567 | 0.082758 |
| 76.46 | 0.076313 | 0.090572 | 0.122977 | 0.132389 | 0.047095 | 0.058357 | 0.072397 | 0.082544 |
| 76.56 | 0.076370 | 0.090580 | 0.123686 | 0.132027 | 0.047130 | 0.058362 | 0.072815 | 0.082318 |
| 76.66 | 0.076048 | 0.090557 | 0.123318 | 0.132249 | 0.046933 | 0.058350 | 0.072601 | 0.082460 |
| 76.76 | 0.076041 | 0.090786 | 0.122314 | 0.131890 | 0.046931 | 0.058499 | 0.072013 | 0.082239 |
| 76.86 | 0.075842 | 0.090077 | 0.122204 | 0.131679 | 0.046810 | 0.058045 | 0.071951 | 0.082111 |
| 76.96 | 0.075989 | 0.090235 | 0.122518 | 0.131499 | 0.046921 | 0.058173 | 0.072168 | 0.082035 |
| 77.06 | 0.075780 | 0.090096 | 0.122470 | 0.131962 | 0.046792 | 0.058083 | 0.072140 | 0.082324 |
| 77.16 | 0.075599 | 0.089809 | 0.121754 | 0.131108 | 0.046664 | 0.057878 | 0.071693 | 0.081763 |
| 77.26 | 0.075109 | 0.089468 | 0.121789 | 0.131198 | 0.046455 | 0.057773 | 0.071857 | 0.081982 |
| 77.36 | 0.075220 | 0.090000 | 0.121363 | 0.130222 | 0.046525 | 0.058120 | 0.071609 | 0.081376 |
| 77.46 | 0.075053 | 0.089538 | 0.120916 | 0.130310 | 0.046424 | 0.057824 | 0.071349 | 0.081435 |
| 77.56 | 0.074674 | 0.089186 | 0.120870 | 0.130415 | 0.046192 | 0.057599 | 0.071325 | 0.081504 |
| 77.66 | 0.074691 | 0.089225 | 0.121350 | 0.130203 | 0.046111 | 0.057511 | 0.071467 | 0.081212 |
| 77.76 | 0.074941 | 0.089404 | 0.120562 | 0.130077 | 0.046268 | 0.057629 | 0.071006 | 0.081137 |
| 77.86 | 0.074995 | 0.089190 | 0.120320 | 0.130148 | 0.046210 | 0.057378 | 0.070724 | 0.081021 |
| 77.96 | 0.074731 | 0.088920 | 0.120520 | 0.130028 | 0.046140 | 0.057320 | 0.070985 | 0.081110 |
| 78.06 | 0.074129 | 0.088928 | 0.120085 | 0.128944 | 0.045789 | 0.057351 | 0.070760 | 0.080470 |
| 78.16 | 0.074607 | 0.088330 | 0.120296 | 0.128814 | 0.045975 | 0.056829 | 0.070716 | 0.080198 |
| 78.26 | 0.074031 | 0.088406 | 0.119613 | 0.128885 | 0.045622 | 0.056880 | 0.070317 | 0.080245 |
| 78.36 | 0.074062 | 0.088144 | 0.119843 | 0.129460 | 0.045550 | 0.056600 | 0.070312 | 0.080443 |
| 78.46 | 0.074298 | 0.087998 | 0.119493 | 0.129108 | 0.045697 | 0.056508 | 0.070110 | 0.080227 |
| 78.56 | 0.073879 | 0.088626 | 0.120114 | 0.128518 | 0.045349 | 0.056797 | 0.070334 | 0.079701 |
| 78.66 | 0.074300 | 0.087963 | 0.119510 | 0.129065 | 0.045609 | 0.056374 | 0.069982 | 0.080043 |
| 78.76 | 0.074291 | 0.088485 | 0.120044 | 0.128875 | 0.045511 | 0.056595 | 0.070153 | 0.079765 |
| 78.86 | 0.073915 | 0.087908 | 0.118940 | 0.128393 | 0.045282 | 0.056228 | 0.069510 | 0.079469 |
| 78.96 | 0.074070 | 0.087849 | 0.118917 | 0.128134 | 0.045377 | 0.056190 | 0.069497 | 0.079309 |
| 79.06 | 0.073403 | 0.087958 | 0.119529 | 0.128464 | 0.044952 | 0.056239 | 0.069829 | 0.079483 |
| 79.16 | 0.073441 | 0.087901 | 0.119293 | 0.128484 | 0.044975 | 0.056202 | 0.069690 | 0.079495 |
| 79.26 | 0.073614 | 0.087823 | 0.118674 | 0.128102 | 0.045082 | 0.056154 | 0.069331 | 0.079261 |
| 79.36 | 0.073461 | 0.087432 | 0.118414 | 0.126969 | 0.044990 | 0.055905 | 0.069181 | 0.078562 |
| 79.46 | 0.073229 | 0.087593 | 0.118520 | 0.127177 | 0.044757 | 0.055895 | 0.069103 | 0.078532 |
| 79.56 | 0.073515 | 0.087023 | 0.117816 | 0.127685 | 0.044951 | 0.055555 | 0.068722 | 0.078879 |
| 79.66 | 0.073375 | 0.087568 | 0.118010 | 0.127329 | 0.044865 | 0.055903 | 0.068835 | 0.078660 |
| 79.76 | 0.073116 | 0.086637 | 0.117627 | 0.126768 | 0.044617 | 0.055197 | 0.068474 | 0.078155 |
| 79.86 | 0.073196 | 0.086848 | 0.118216 | 0.126945 | 0.044667 | 0.055333 | 0.068818 | 0.078266 |
| 79.96 | 0.072566 | 0.086948 | 0.118152 | 0.126412 | 0.044192 | 0.055284 | 0.068640 | 0.077778 |
| 80.06 | 0.072592 | 0.086991 | 0.117533 | 0.126036 | 0.044190 | 0.055289 | 0.068254 | 0.077517 |
| 80.16 | 0.072670 | 0.086737 | 0.117880 | 0.126787 | 0.044147 | 0.055015 | 0.068315 | 0.077818 |
| 80.26 | 0.073055 | 0.086571 | 0.117157 | 0.126570 | 0.044290 | 0.054796 | 0.067755 | 0.077525 |
| 80.36 | 0.072781 | 0.086962 | 0.117396 | 0.126130 | 0.044124 | 0.055043 | 0.067894 | 0.077256 |
| 80.46 | 0.072295 | 0.086625 | 0.117130 | 0.126542 | 0.043829 | 0.054831 | 0.067740 | 0.077509 |
| 80.56 | 0.072373 | 0.086741 | 0.116793 | 0.126477 | 0.043786 | 0.054790 | 0.067406 | 0.077309 |
| 80.66 | 0.072772 | 0.086478 | 0.117636 | 0.125721 | 0.043936 | 0.054511 | 0.067752 | 0.076687 |
| 80.76 | 0.072333 | 0.086281 | 0.116848 | 0.126357 | 0.043580 | 0.054274 | 0.067158 | 0.076915 |
| 80.86 | 0.072659 | 0.086336 | 0.117064 | 0.126291 | 0.043776 | 0.054308 | 0.067282 | 0.076875 |
| 80.96 | 0.072682 | 0.086544 | 0.116974 | 0.125834 | 0.043681 | 0.054303 | 0.067062 | 0.076405 |
| 81.06 | 0.072553 | 0.085838 | 0.117151 | 0.125401 | 0.043694 | 0.053973 | 0.067304 | 0.076300 |
| 81.16 | 0.072036 | 0.086211 | 0.116941 | 0.125456 | 0.043292 | 0.054094 | 0.067042 | 0.076174 |
| 81.26 | 0.071962 | 0.086041 | 0.116866 | 0.125280 | 0.043247 | 0.053986 | 0.066999 | 0.076067 |
| 81.36 | 0.072031 | 0.086204 | 0.116143 | 0.125720 | 0.043198 | 0.053975 | 0.066444 | 0.076174 |
| 81.46 | 0.071809 | 0.085673 | 0.116181 | 0.124925 | 0.043064 | 0.053642 | 0.066466 | 0.075691 |
| 81.56 | 0.071946 | 0.085569 | 0.115986 | 0.125429 | 0.043055 | 0.053464 | 0.066214 | 0.075836 |
| 81.66 | 0.071821 | 0.085851 | 0.116462 | 0.124962 | 0.043088 | 0.053775 | 0.066653 | 0.075744 |
| 81.76 | 0.072083 | 0.085293 | 0.115538 | 0.124373 | 0.043154 | 0.053313 | 0.065984 | 0.075228 |
| 81.86 | 0.071395 | 0.085162 | 0.116188 | 0.124237 | 0.042742 | 0.053229 | 0.066354 | 0.075144 |
| 81.96 | 0.071484 | 0.085462 | 0.116194 | 0.124248 | 0.042795 | 0.053417 | 0.066358 | 0.075151 |
| 82.06 | 0.071722 | 0.084941 | 0.115990 | 0.124263 | 0.042919 | 0.053068 | 0.066212 | 0.075126 |
| 82.16 | 0.071517 | 0.085377 | 0.115159 | 0.123572 | 0.042886 | 0.053453 | 0.065876 | 0.074866 |
| 82.26 | 0.071561 | 0.084980 | 0.114781 | 0.124507 | 0.042821 | 0.053091 | 0.065520 | 0.075272 |
| 82.36 | 0.071210 | 0.084878 | 0.115086 | 0.123520 | 0.042520 | 0.052915 | 0.065554 | 0.074516 |
| 82.46 | 0.071648 | 0.085182 | 0.114955 | 0.123796 | 0.042782 | 0.053104 | 0.065480 | 0.074683 |
| 82.56 | 0.071442 | 0.084759 | 0.115270 | 0.124230 | 0.042749 | 0.052952 | 0.065798 | 0.075103 |
| 82.66 | 0.071198 | 0.085012 | 0.114997 | 0.123626 | 0.042602 | 0.053109 | 0.065641 | 0.074736 |
| 82.76 | 0.070988 | 0.084496 | 0.115194 | 0.123541 | 0.042385 | 0.052674 | 0.065613 | 0.074525 |
| 82.86 | 0.070943 | 0.085007 | 0.114318 | 0.123720 | 0.042358 | 0.052992 | 0.065114 | 0.074633 |
| 82.96 | 0.071075 | 0.084125 | 0.114555 | 0.123305 | 0.042528 | 0.052554 | 0.065387 | 0.074541 |
| 83.06 | 0.070487 | 0.083999 | 0.113997 | 0.123436 | 0.042175 | 0.052474 | 0.065068 | 0.074618 |
| 83.16 | 0.071051 | 0.084251 | 0.114454 | 0.123316 | 0.042512 | 0.052632 | 0.065329 | 0.074546 |
| 83.26 | 0.070525 | 0.084341 | 0.114203 | 0.122541 | 0.042215 | 0.052709 | 0.065211 | 0.074108 |
| 83.36 | 0.070801 | 0.084033 | 0.113587 | 0.122828 | 0.042380 | 0.052516 | 0.064859 | 0.074281 |
| 83.46 | 0.070301 | 0.084016 | 0.113711 | 0.122811 | 0.042170 | 0.052618 | 0.065069 | 0.074429 |
| 83.56 | 0.070139 | 0.083806 | 0.113403 | 0.122723 | 0.042073 | 0.052486 | 0.064893 | 0.074376 |
| 83.66 | 0.070177 | 0.083490 | 0.114005 | 0.122591 | 0.042095 | 0.052288 | 0.065236 | 0.074295 |
| 83.76 | 0.070003 | 0.083635 | 0.113747 | 0.122051 | 0.042081 | 0.052491 | 0.065228 | 0.074127 |
| 83.86 | 0.069829 | 0.083780 | 0.113214 | 0.121808 | 0.041886 | 0.052469 | 0.064783 | 0.073819 |
| 83.96 | 0.070277 | 0.083770 | 0.113135 | 0.122012 | 0.042155 | 0.052463 | 0.064738 | 0.073943 |
| 84.06 | 0.070092 | 0.083000 | 0.112554 | 0.122002 | 0.042025 | 0.051957 | 0.064377 | 0.073904 |
| 84.16 | 0.069873 | 0.083488 | 0.112776 | 0.121288 | 0.041894 | 0.052262 | 0.064503 | 0.073471 |
| 84.26 | 0.069686 | 0.083362 | 0.112752 | 0.121132 | 0.041782 | 0.052183 | 0.064490 | 0.073376 |
| 84.36 | 0.070121 | 0.083469 | 0.112925 | 0.121109 | 0.042042 | 0.052251 | 0.064588 | 0.073363 |
| 84.46 | 0.069522 | 0.082954 | 0.112388 | 0.121428 | 0.041773 | 0.052040 | 0.064420 | 0.073714 |
| 84.56 | 0.069994 | 0.082847 | 0.112796 | 0.121361 | 0.042057 | 0.051973 | 0.064654 | 0.073674 |
| 84.66 | 0.069759 | 0.083229 | 0.112443 | 0.120543 | 0.042006 | 0.052325 | 0.064591 | 0.073335 |
| 84.76 | 0.069730 | 0.083334 | 0.112922 | 0.120841 | 0.041898 | 0.052278 | 0.064726 | 0.073358 |
| 84.86 | 0.069968 | 0.082776 | 0.112436 | 0.121447 | 0.042040 | 0.051928 | 0.064447 | 0.073725 |
| 84.96 | 0.069546 | 0.083167 | 0.112826 | 0.121189 | 0.041787 | 0.052173 | 0.064670 | 0.073568 |
| 85.06 | 0.069787 | 0.083196 | 0.112935 | 0.120904 | 0.041932 | 0.052191 | 0.064732 | 0.073395 |
| 85.16 | 0.069685 | 0.082838 | 0.112773 | 0.120669 | 0.041961 | 0.052079 | 0.064780 | 0.073411 |
| 85.26 | 0.069490 | 0.083053 | 0.112424 | 0.120782 | 0.041844 | 0.052214 | 0.064579 | 0.073480 |
| 85.36 | 0.069668 | 0.082711 | 0.112142 | 0.121225 | 0.041951 | 0.051999 | 0.064417 | 0.073749 |
| 85.46 | 0.069471 | 0.082502 | 0.112724 | 0.121101 | 0.041832 | 0.051868 | 0.064752 | 0.073674 |
| 85.56 | 0.069561 | 0.082443 | 0.111682 | 0.120227 | 0.041996 | 0.051966 | 0.064320 | 0.073333 |
| 85.66 | 0.069063 | 0.082771 | 0.111571 | 0.120901 | 0.041695 | 0.052172 | 0.064256 | 0.073744 |
| 85.76 | 0.069594 | 0.082615 | 0.111553 | 0.120461 | 0.042016 | 0.052074 | 0.064246 | 0.073476 |
| 85.86 | 0.068979 | 0.082644 | 0.111912 | 0.120064 | 0.041735 | 0.052206 | 0.064593 | 0.073393 |
| 85.96 | 0.068987 | 0.082297 | 0.111705 | 0.120178 | 0.041739 | 0.051987 | 0.064473 | 0.073463 |
| 86.06 | 0.068884 | 0.082262 | 0.111660 | 0.120441 | 0.041587 | 0.051852 | 0.064308 | 0.073464 |
| 86.16 | 0.069278 | 0.082617 | 0.111623 | 0.120295 | 0.042007 | 0.052302 | 0.064567 | 0.073694 |
| 86.26 | 0.069041 | 0.082041 | 0.111232 | 0.120115 | 0.041863 | 0.051938 | 0.064340 | 0.073584 |
| 86.36 | 0.069043 | 0.082105 | 0.110801 | 0.119763 | 0.041865 | 0.051979 | 0.064092 | 0.073369 |
| 86.46 | 0.068645 | 0.081926 | 0.110975 | 0.120098 | 0.041624 | 0.051866 | 0.064192 | 0.073574 |
| 86.56 | 0.069038 | 0.082259 | 0.111187 | 0.120166 | 0.041862 | 0.052077 | 0.064315 | 0.073616 |
| 86.66 | 0.068974 | 0.081827 | 0.110840 | 0.119190 | 0.041823 | 0.051803 | 0.064114 | 0.073018 |
| 86.76 | 0.068964 | 0.081978 | 0.110872 | 0.119289 | 0.041909 | 0.052012 | 0.064273 | 0.073239 |
| 86.86 | 0.068716 | 0.082106 | 0.111382 | 0.118963 | 0.041758 | 0.052093 | 0.064569 | 0.073039 |
| 86.96 | 0.068514 | 0.081830 | 0.111194 | 0.118920 | 0.041726 | 0.052033 | 0.064601 | 0.073173 |
| 87.06 | 0.068717 | 0.081625 | 0.111070 | 0.118835 | 0.041850 | 0.051902 | 0.064529 | 0.073120 |
| 87.16 | 0.068163 | 0.081834 | 0.110317 | 0.118848 | 0.041604 | 0.052149 | 0.064233 | 0.073289 |
| 87.26 | 0.068629 | 0.081867 | 0.110628 | 0.119031 | 0.041889 | 0.052171 | 0.064414 | 0.073402 |
| 87.36 | 0.067991 | 0.081178 | 0.110679 | 0.118549 | 0.041590 | 0.051845 | 0.064586 | 0.073266 |
| 87.46 | 0.068147 | 0.081235 | 0.110463 | 0.119154 | 0.041686 | 0.051881 | 0.064460 | 0.073640 |
| 87.56 | 0.068176 | 0.081276 | 0.110556 | 0.118483 | 0.041613 | 0.051795 | 0.064373 | 0.073066 |
| 87.66 | 0.068338 | 0.081099 | 0.110632 | 0.118305 | 0.041712 | 0.051682 | 0.064417 | 0.072956 |
| 87.76 | 0.068468 | 0.081006 | 0.110767 | 0.118789 | 0.041791 | 0.051623 | 0.064496 | 0.073254 |
| 87.86 | 0.068016 | 0.081009 | 0.110735 | 0.118956 | 0.041516 | 0.051624 | 0.064478 | 0.073357 |
| 87.96 | 0.068430 | 0.080932 | 0.110425 | 0.118011 | 0.041860 | 0.051689 | 0.064439 | 0.072935 |
| 88.06 | 0.068329 | 0.081202 | 0.110163 | 0.118126 | 0.041799 | 0.051862 | 0.064286 | 0.073007 |
| 88.16 | 0.068204 | 0.080850 | 0.110267 | 0.118811 | 0.041631 | 0.051525 | 0.064206 | 0.073270 |
| 88.26 | 0.067969 | 0.080825 | 0.109888 | 0.118127 | 0.041488 | 0.051508 | 0.063986 | 0.072848 |
| 88.36 | 0.067824 | 0.080869 | 0.110237 | 0.118280 | 0.041509 | 0.051673 | 0.064360 | 0.073136 |
| 88.46 | 0.068112 | 0.080632 | 0.110121 | 0.118542 | 0.041685 | 0.051522 | 0.064292 | 0.073298 |
| 88.56 | 0.068204 | 0.080799 | 0.109988 | 0.117844 | 0.041742 | 0.051629 | 0.064214 | 0.072866 |
| 88.66 | 0.068074 | 0.080668 | 0.109590 | 0.117719 | 0.041662 | 0.051545 | 0.063982 | 0.072789 |
| 88.76 | 0.067907 | 0.080727 | 0.109842 | 0.117935 | 0.041469 | 0.051470 | 0.063989 | 0.072763 |
| 88.86 | 0.067752 | 0.080761 | 0.109883 | 0.117604 | 0.041374 | 0.051491 | 0.064012 | 0.072559 |
| 88.96 | 0.067973 | 0.080776 | 0.109806 | 0.118444 | 0.041509 | 0.051501 | 0.063968 | 0.073077 |
| 89.06 | 0.067934 | 0.081290 | 0.109886 | 0.118557 | 0.041486 | 0.051829 | 0.064015 | 0.073147 |
| 89.16 | 0.067697 | 0.081174 | 0.109819 | 0.117642 | 0.041250 | 0.051641 | 0.063835 | 0.072423 |
| 89.26 | 0.068164 | 0.080899 | 0.109842 | 0.117859 | 0.041535 | 0.051467 | 0.063849 | 0.072557 |
| 89.36 | 0.067926 | 0.081203 | 0.109770 | 0.118239 | 0.041390 | 0.051660 | 0.063807 | 0.072791 |
| 89.46 | 0.067750 | 0.080895 | 0.110275 | 0.118451 | 0.041192 | 0.051351 | 0.063959 | 0.072761 |
| 89.56 | 0.068208 | 0.081129 | 0.110266 | 0.118153 | 0.041471 | 0.051499 | 0.063954 | 0.072578 |
| 89.66 | 0.067872 | 0.080520 | 0.109558 | 0.117881 | 0.041448 | 0.051339 | 0.063825 | 0.072731 |
| 89.76 | 0.067500 | 0.080893 | 0.108980 | 0.117929 | 0.041313 | 0.051691 | 0.063629 | 0.072923 |
| 89.86 | 0.067754 | 0.080432 | 0.109524 | 0.117701 | 0.041377 | 0.051285 | 0.063807 | 0.072622 |
| 89.96 | 0.067457 | 0.080255 | 0.109692 | 0.117438 | 0.041196 | 0.051171 | 0.063905 | 0.072460 |
| 90.06 | 0.067719 | 0.080529 | 0.108615 | 0.117241 | 0.041448 | 0.051461 | 0.063418 | 0.072500 |
| 90.16 | 0.067411 | 0.080345 | 0.109051 | 0.117676 | 0.041151 | 0.051207 | 0.063504 | 0.072576 |
| 90.26 | 0.067240 | 0.080285 | 0.109480 | 0.117546 | 0.041046 | 0.051169 | 0.063754 | 0.072496 |
| 90.36 | 0.067354 | 0.080295 | 0.108623 | 0.117649 | 0.041116 | 0.051175 | 0.063255 | 0.072560 |
| 90.46 | 0.067781 | 0.080200 | 0.109373 | 0.117009 | 0.041285 | 0.051002 | 0.063551 | 0.072005 |
| 90.56 | 0.067756 | 0.080355 | 0.109253 | 0.117231 | 0.041270 | 0.051100 | 0.063481 | 0.072142 |
| 90.66 | 0.067489 | 0.080658 | 0.109280 | 0.117313 | 0.041107 | 0.051293 | 0.063497 | 0.072193 |
| 90.76 | 0.067472 | 0.080104 | 0.108580 | 0.116835 | 0.041006 | 0.050829 | 0.062951 | 0.071739 |
| 90.86 | 0.067586 | 0.080250 | 0.108893 | 0.117787 | 0.041076 | 0.050921 | 0.063132 | 0.072324 |
| 90.96 | 0.067757 | 0.080454 | 0.109416 | 0.117602 | 0.041088 | 0.050938 | 0.063295 | 0.072050 |
| 91.06 | 0.067399 | 0.080564 | 0.108723 | 0.116993 | 0.040962 | 0.051121 | 0.063035 | 0.071838 |
| 91.16 | 0.067645 | 0.080587 | 0.108426 | 0.116559 | 0.041021 | 0.051022 | 0.062723 | 0.071412 |
| 91.26 | 0.067098 | 0.080533 | 0.109123 | 0.117175 | 0.040689 | 0.050988 | 0.063126 | 0.071790 |
| 91.36 | 0.067163 | 0.080162 | 0.108901 | 0.116716 | 0.040638 | 0.050640 | 0.062857 | 0.071349 |
| 91.46 | 0.067338 | 0.080290 | 0.108567 | 0.116540 | 0.040744 | 0.050720 | 0.062664 | 0.071241 |
| 91.56 | 0.067043 | 0.080422 | 0.108316 | 0.116587 | 0.040656 | 0.050918 | 0.062660 | 0.071429 |
| 91.66 | 0.066951 | 0.079911 | 0.108346 | 0.117074 | 0.040510 | 0.050481 | 0.062537 | 0.071568 |
| 91.76 | 0.067043 | 0.080207 | 0.108700 | 0.117173 | 0.040565 | 0.050668 | 0.062741 | 0.071628 |
| 91.86 | 0.067455 | 0.079977 | 0.108576 | 0.116974 | 0.040814 | 0.050523 | 0.062670 | 0.071507 |
| 91.96 | 0.067446 | 0.080082 | 0.108759 | 0.116737 | 0.040717 | 0.050476 | 0.062635 | 0.071202 |
| 92.06 | 0.066909 | 0.079723 | 0.108212 | 0.116329 | 0.040484 | 0.050363 | 0.062460 | 0.071113 |
| 92.16 | 0.066980 | 0.080179 | 0.108565 | 0.116218 | 0.040418 | 0.050514 | 0.062495 | 0.070854 |
| 92.26 | 0.067183 | 0.080350 | 0.108467 | 0.116732 | 0.040449 | 0.050509 | 0.062299 | 0.071008 |
| 92.36 | 0.067086 | 0.080025 | 0.108396 | 0.116071 | 0.040482 | 0.050418 | 0.062398 | 0.070764 |
| 92.46 | 0.067111 | 0.080080 | 0.108177 | 0.116163 | 0.040497 | 0.050452 | 0.062272 | 0.070820 |
| 92.56 | 0.067089 | 0.079702 | 0.108793 | 0.116916 | 0.040484 | 0.050214 | 0.062626 | 0.071279 |
| 92.66 | 0.066786 | 0.079771 | 0.108693 | 0.116415 | 0.040210 | 0.050145 | 0.062428 | 0.070814 |
| 92.76 | 0.067220 | 0.079682 | 0.108008 | 0.116877 | 0.040471 | 0.050088 | 0.062035 | 0.071095 |
| 92.86 | 0.067025 | 0.080173 | 0.108489 | 0.117036 | 0.040354 | 0.050397 | 0.062311 | 0.071192 |
| 92.96 | 0.067176 | 0.079619 | 0.107911 | 0.117013 | 0.040445 | 0.050049 | 0.061979 | 0.071178 |
| 93.06 | 0.067274 | 0.079534 | 0.108071 | 0.116370 | 0.040413 | 0.049883 | 0.061931 | 0.070627 |
| 93.16 | 0.066947 | 0.079941 | 0.107911 | 0.116574 | 0.040217 | 0.050138 | 0.061840 | 0.070751 |
| 93.26 | 0.067327 | 0.079959 | 0.108470 | 0.116469 | 0.040353 | 0.050036 | 0.062019 | 0.070528 |
| 93.36 | 0.067015 | 0.080093 | 0.108345 | 0.116242 | 0.040166 | 0.050120 | 0.061948 | 0.070390 |
| 93.46 | 0.066754 | 0.080001 | 0.107989 | 0.116691 | 0.040010 | 0.050062 | 0.061744 | 0.070662 |
| 93.56 | 0.067081 | 0.079788 | 0.108398 | 0.115879 | 0.040297 | 0.050042 | 0.062118 | 0.070329 |
| 93.66 | 0.066958 | 0.079493 | 0.107900 | 0.116219 | 0.040132 | 0.049744 | 0.061692 | 0.070375 |
| 93.76 | 0.067022 | 0.079938 | 0.108313 | 0.116032 | 0.040079 | 0.049909 | 0.061788 | 0.070103 |
| 93.86 | 0.066894 | 0.079486 | 0.108349 | 0.116588 | 0.040002 | 0.049627 | 0.061808 | 0.070438 |
| 93.96 | 0.066936 | 0.079711 | 0.108659 | 0.116218 | 0.039937 | 0.049655 | 0.061846 | 0.070057 |
| 94.06 | 0.066689 | 0.079498 | 0.107707 | 0.115761 | 0.039880 | 0.049634 | 0.061442 | 0.069939 |
| 94.16 | 0.067087 | 0.079930 | 0.107667 | 0.116711 | 0.040117 | 0.049904 | 0.061420 | 0.070513 |
| 94.26 | 0.066964 | 0.080152 | 0.108208 | 0.116701 | 0.039954 | 0.049930 | 0.061590 | 0.070348 |
| 94.36 | 0.066915 | 0.079999 | 0.108232 | 0.115875 | 0.040015 | 0.049947 | 0.061742 | 0.070008 |
| 94.46 | 0.067166 | 0.079572 | 0.108463 | 0.116051 | 0.040074 | 0.049567 | 0.061733 | 0.069955 |
| 94.56 | 0.066841 | 0.079549 | 0.108351 | 0.116229 | 0.039880 | 0.049553 | 0.061669 | 0.070062 |
| 94.66 | 0.066616 | 0.079541 | 0.107504 | 0.115856 | 0.039853 | 0.049682 | 0.061352 | 0.070026 |
| 94.76 | 0.066667 | 0.079541 | 0.107388 | 0.116361 | 0.039883 | 0.049682 | 0.061286 | 0.070331 |
| 94.86 | 0.066512 | 0.079196 | 0.108094 | 0.115860 | 0.039791 | 0.049467 | 0.061689 | 0.070029 |
| 94.96 | 0.066676 | 0.079505 | 0.107627 | 0.115356 | 0.039979 | 0.049772 | 0.061562 | 0.069882 |
| 95.06 | 0.066820 | 0.079171 | 0.107913 | 0.115646 | 0.039974 | 0.049450 | 0.061585 | 0.069898 |
| 95.16 | 0.066650 | 0.079545 | 0.107796 | 0.115557 | 0.039963 | 0.049797 | 0.061658 | 0.070003 |
| 95.26 | 0.066711 | 0.079412 | 0.107507 | 0.115739 | 0.039909 | 0.049600 | 0.061353 | 0.069954 |
| 95.36 | 0.066431 | 0.079367 | 0.107480 | 0.116026 | 0.039741 | 0.049572 | 0.061338 | 0.070128 |
| 95.46 | 0.066733 | 0.079135 | 0.108002 | 0.115228 | 0.039922 | 0.049427 | 0.061635 | 0.069645 |
| 95.56 | 0.066717 | 0.079011 | 0.107289 | 0.116024 | 0.039821 | 0.049237 | 0.061089 | 0.069966 |
| 95.66 | 0.066468 | 0.079564 | 0.107923 | 0.115887 | 0.039673 | 0.049582 | 0.061450 | 0.069884 |
| 95.76 | 0.066449 | 0.079287 | 0.107951 | 0.116074 | 0.039661 | 0.049409 | 0.061466 | 0.069996 |
| 95.86 | 0.066862 | 0.078998 | 0.107695 | 0.115628 | 0.039908 | 0.049229 | 0.061320 | 0.069727 |
| 95.96 | 0.066686 | 0.078999 | 0.107613 | 0.115332 | 0.039803 | 0.049230 | 0.061273 | 0.069548 |
| 96.06 | 0.066692 | 0.079001 | 0.107094 | 0.115531 | 0.039897 | 0.049342 | 0.061116 | 0.069827 |
| 96.16 | 0.066450 | 0.079035 | 0.107674 | 0.115087 | 0.039752 | 0.049364 | 0.061447 | 0.069558 |
| 96.26 | 0.066416 | 0.079177 | 0.107513 | 0.114958 | 0.039732 | 0.049453 | 0.061355 | 0.069480 |
| 96.36 | 0.066094 | 0.078740 | 0.107500 | 0.115604 | 0.039629 | 0.049292 | 0.061487 | 0.070029 |
| 96.46 | 0.066436 | 0.078795 | 0.106862 | 0.115228 | 0.039834 | 0.049326 | 0.061122 | 0.069802 |
| 96.56 | 0.066178 | 0.078642 | 0.106777 | 0.115571 | 0.039570 | 0.049095 | 0.060905 | 0.069817 |
| 96.66 | 0.066257 | 0.079017 | 0.106604 | 0.115145 | 0.039708 | 0.049441 | 0.060946 | 0.069718 |
| 96.76 | 0.066046 | 0.078449 | 0.106927 | 0.114622 | 0.039581 | 0.049086 | 0.061130 | 0.069402 |
| 96.86 | 0.066092 | 0.078850 | 0.106517 | 0.114653 | 0.039609 | 0.049336 | 0.060896 | 0.069420 |
| 96.96 | 0.065908 | 0.078548 | 0.106996 | 0.114898 | 0.039498 | 0.049148 | 0.061169 | 0.069569 |
| 97.06 | 0.066232 | 0.078708 | 0.106314 | 0.114594 | 0.039783 | 0.049360 | 0.060918 | 0.069543 |
| 97.16 | 0.065949 | 0.079046 | 0.106920 | 0.115357 | 0.039523 | 0.049459 | 0.061126 | 0.069847 |
| 97.26 | 0.065742 | 0.078383 | 0.106928 | 0.114136 | 0.039489 | 0.049156 | 0.061270 | 0.069265 |
| 97.36 | 0.066208 | 0.078639 | 0.106971 | 0.115092 | 0.039769 | 0.049317 | 0.061295 | 0.069845 |
| 97.46 | 0.065863 | 0.078256 | 0.106554 | 0.114481 | 0.039562 | 0.049077 | 0.061055 | 0.069474 |
| 97.56 | 0.065910 | 0.078697 | 0.107031 | 0.114793 | 0.039499 | 0.049240 | 0.061188 | 0.069503 |
| 97.66 | 0.065940 | 0.078414 | 0.106265 | 0.114833 | 0.039517 | 0.049063 | 0.060751 | 0.069528 |
| 97.76 | 0.066049 | 0.078770 | 0.106405 | 0.115152 | 0.039582 | 0.049285 | 0.060830 | 0.069721 |
| 97.86 | 0.065577 | 0.078263 | 0.106460 | 0.114294 | 0.039389 | 0.049080 | 0.061001 | 0.069360 |
| 97.96 | 0.065577 | 0.078488 | 0.106605 | 0.114446 | 0.039389 | 0.049221 | 0.061084 | 0.069452 |
| 98.06 | 0.066079 | 0.078070 | 0.105888 | 0.114448 | 0.039691 | 0.048959 | 0.060673 | 0.069453 |
| 98.16 | 0.065894 | 0.078091 | 0.106112 | 0.114812 | 0.039580 | 0.048972 | 0.060802 | 0.069674 |
| 98.26 | 0.065639 | 0.078720 | 0.106552 | 0.114533 | 0.039426 | 0.049367 | 0.061054 | 0.069505 |
| 98.36 | 0.066049 | 0.078212 | 0.106212 | 0.114366 | 0.039581 | 0.048936 | 0.060719 | 0.069244 |
| 98.46 | 0.065583 | 0.078288 | 0.106417 | 0.114590 | 0.039302 | 0.048983 | 0.060836 | 0.069379 |
| 98.56 | 0.065634 | 0.078546 | 0.106458 | 0.114714 | 0.039333 | 0.049145 | 0.060860 | 0.069455 |
| 98.66 | 0.065919 | 0.078160 | 0.106095 | 0.114793 | 0.039503 | 0.048903 | 0.060652 | 0.069502 |
| 98.76 | 0.065621 | 0.078240 | 0.106252 | 0.114104 | 0.039234 | 0.048840 | 0.060602 | 0.068926 |
| 98.86 | 0.066047 | 0.078398 | 0.106638 | 0.114575 | 0.039489 | 0.048939 | 0.060822 | 0.069210 |
| 98.96 | 0.065605 | 0.078682 | 0.106272 | 0.114439 | 0.039225 | 0.049116 | 0.060613 | 0.069128 |
| 99.06 | 0.066015 | 0.078371 | 0.106517 | 0.114698 | 0.039561 | 0.049035 | 0.060893 | 0.069445 |
| 99.16 | 0.065862 | 0.078305 | 0.106137 | 0.114774 | 0.039469 | 0.048994 | 0.060676 | 0.069491 |
| 99.26 | 0.065917 | 0.078735 | 0.106166 | 0.114208 | 0.039502 | 0.049263 | 0.060693 | 0.069148 |
| 99.36 | 0.065668 | 0.078332 | 0.106621 | 0.114295 | 0.039353 | 0.049011 | 0.060953 | 0.069201 |
| 99.46 | 0.065814 | 0.078443 | 0.106213 | 0.114491 | 0.039350 | 0.048967 | 0.060579 | 0.069160 |
| 99.56 | 0.066026 | 0.078470 | 0.105866 | 0.113925 | 0.039476 | 0.048983 | 0.060382 | 0.068818 |
| 99.66 | 0.065535 | 0.078668 | 0.106105 | 0.114267 | 0.039273 | 0.049221 | 0.060658 | 0.069184 |
| 99.76 | 0.065903 | 0.078694 | 0.106587 | 0.114208 | 0.039494 | 0.049237 | 0.060933 | 0.069148 |
| 99.86 | 0.065950 | 0.078445 | 0.106160 | 0.114838 | 0.039431 | 0.048968 | 0.060549 | 0.069369 |
| 99.96 | 0.065953 | 0.078320 | 0.106170 | 0.114505 | 0.039433 | 0.048890 | 0.060555 | 0.069168 |
| 100.06 | 0.066105 | 0.078540 | 0.106480 | 0.114794 | 0.039524 | 0.049027 | 0.060732 | 0.069343 |
| 100.16 | 0.065593 | 0.078231 | 0.105915 | 0.114658 | 0.039217 | 0.048835 | 0.060410 | 0.069260 |
| 100.26 | 0.065470 | 0.078211 | 0.105950 | 0.114146 | 0.039234 | 0.048934 | 0.060568 | 0.069109 |
| 100.36 | 0.065640 | 0.078433 | 0.105954 | 0.113745 | 0.039245 | 0.048959 | 0.060430 | 0.068707 |
| 100.46 | 0.065384 | 0.078162 | 0.106413 | 0.114569 | 0.039092 | 0.048790 | 0.060692 | 0.069205 |
| 100.56 | 0.065534 | 0.078201 | 0.105990 | 0.113696 | 0.039181 | 0.048814 | 0.060450 | 0.068678 |
| 100.66 | 0.065549 | 0.077987 | 0.105662 | 0.114382 | 0.039190 | 0.048681 | 0.060264 | 0.069092 |
| 100.76 | 0.065903 | 0.078177 | 0.106120 | 0.114577 | 0.039402 | 0.048799 | 0.060525 | 0.069210 |
| 100.86 | 0.065707 | 0.078265 | 0.106221 | 0.114331 | 0.039285 | 0.048854 | 0.060582 | 0.069061 |
| 100.96 | 0.065370 | 0.077984 | 0.106201 | 0.113849 | 0.039083 | 0.048679 | 0.060571 | 0.068770 |
| 101.06 | 0.065592 | 0.078340 | 0.106281 | 0.114611 | 0.039125 | 0.048788 | 0.060476 | 0.069070 |
| 101.16 | 0.065379 | 0.078091 | 0.106223 | 0.114193 | 0.039088 | 0.048746 | 0.060584 | 0.068978 |
| 101.26 | 0.065411 | 0.078462 | 0.106191 | 0.113910 | 0.039017 | 0.048864 | 0.060425 | 0.068648 |
| 101.36 | 0.065722 | 0.078253 | 0.106356 | 0.114396 | 0.039113 | 0.048623 | 0.060381 | 0.068783 |
| 101.46 | 0.065499 | 0.078064 | 0.106063 | 0.113639 | 0.039069 | 0.048616 | 0.060352 | 0.068484 |
| 101.56 | 0.065483 | 0.078015 | 0.106538 | 0.114494 | 0.039060 | 0.048585 | 0.060623 | 0.068999 |
| 101.66 | 0.065390 | 0.078114 | 0.106512 | 0.114034 | 0.039004 | 0.048647 | 0.060608 | 0.068722 |
| 101.76 | 0.065388 | 0.078396 | 0.106032 | 0.114090 | 0.039003 | 0.048823 | 0.060335 | 0.068756 |
| 101.86 | 0.065386 | 0.077805 | 0.105579 | 0.113963 | 0.039019 | 0.048476 | 0.060103 | 0.068709 |
| 101.96 | 0.065198 | 0.077730 | 0.106000 | 0.114300 | 0.038907 | 0.048429 | 0.060342 | 0.068912 |
| 102.06 | 0.065192 | 0.078319 | 0.106175 | 0.114198 | 0.038903 | 0.048796 | 0.060442 | 0.068851 |
| 102.16 | 0.065608 | 0.077745 | 0.105417 | 0.113472 | 0.039151 | 0.048438 | 0.060010 | 0.068413 |
| 102.26 | 0.065658 | 0.078032 | 0.106039 | 0.113765 | 0.039181 | 0.048617 | 0.060364 | 0.068589 |
| 102.36 | 0.065248 | 0.077678 | 0.105509 | 0.113455 | 0.038936 | 0.048396 | 0.060063 | 0.068402 |
| 102.46 | 0.065468 | 0.077749 | 0.105367 | 0.113363 | 0.039068 | 0.048440 | 0.059982 | 0.068347 |
| 102.56 | 0.065691 | 0.078126 | 0.106172 | 0.113677 | 0.039110 | 0.048562 | 0.060300 | 0.068377 |
| 102.66 | 0.065700 | 0.077690 | 0.105521 | 0.114161 | 0.039115 | 0.048291 | 0.059930 | 0.068668 |
| 102.76 | 0.065393 | 0.078270 | 0.105608 | 0.113907 | 0.038933 | 0.048652 | 0.059980 | 0.068515 |
| 102.86 | 0.065885 | 0.078053 | 0.106409 | 0.114003 | 0.039117 | 0.048384 | 0.060268 | 0.068385 |
| 102.96 | 0.065599 | 0.077718 | 0.105395 | 0.114250 | 0.039055 | 0.048308 | 0.059858 | 0.068722 |
| 103.06 | 0.065553 | 0.077917 | 0.105917 | 0.114229 | 0.039028 | 0.048432 | 0.060154 | 0.068709 |
| 103.16 | 0.065679 | 0.078109 | 0.105407 | 0.113806 | 0.038993 | 0.048416 | 0.059698 | 0.068263 |
| 103.26 | 0.065659 | 0.077790 | 0.106228 | 0.113945 | 0.038981 | 0.048218 | 0.060163 | 0.068347 |
| 103.36 | 0.065655 | 0.077811 | 0.105941 | 0.113972 | 0.038979 | 0.048231 | 0.060000 | 0.068362 |
| 103.46 | 0.065707 | 0.077746 | 0.106017 | 0.113468 | 0.038918 | 0.048078 | 0.059902 | 0.067901 |
| 103.56 | 0.065220 | 0.078311 | 0.105836 | 0.113427 | 0.038630 | 0.048428 | 0.059800 | 0.067877 |
| 103.66 | 0.065221 | 0.078322 | 0.105751 | 0.113730 | 0.038631 | 0.048435 | 0.059752 | 0.068058 |
| 103.76 | 0.065768 | 0.078140 | 0.106169 | 0.113740 | 0.038954 | 0.048322 | 0.059988 | 0.068064 |
| 103.86 | 0.065566 | 0.077922 | 0.105524 | 0.113575 | 0.038744 | 0.048074 | 0.059484 | 0.067806 |
| 103.96 | 0.065492 | 0.078185 | 0.105687 | 0.113936 | 0.038700 | 0.048236 | 0.059576 | 0.068021 |
| 104.06 | 0.065530 | 0.077707 | 0.106125 | 0.113975 | 0.038722 | 0.047941 | 0.059823 | 0.068044 |
| 104.16 | 0.065566 | 0.078327 | 0.105611 | 0.113474 | 0.038653 | 0.048210 | 0.059393 | 0.067586 |
| 104.26 | 0.065775 | 0.078066 | 0.105474 | 0.113309 | 0.038776 | 0.048050 | 0.059316 | 0.067488 |
| 104.36 | 0.065393 | 0.078064 | 0.105434 | 0.113396 | 0.038551 | 0.048048 | 0.059293 | 0.067539 |
| 104.46 | 0.065519 | 0.078113 | 0.106221 | 0.113823 | 0.038625 | 0.048078 | 0.059736 | 0.067794 |
| 104.56 | 0.065657 | 0.078111 | 0.106055 | 0.113719 | 0.038706 | 0.048077 | 0.059643 | 0.067732 |
| 104.66 | 0.065459 | 0.078276 | 0.105735 | 0.113656 | 0.038499 | 0.048065 | 0.059323 | 0.067535 |
| 104.76 | 0.065231 | 0.077945 | 0.105693 | 0.113920 | 0.038365 | 0.047862 | 0.059299 | 0.067692 |
| 104.86 | 0.065153 | 0.077755 | 0.105199 | 0.113095 | 0.038316 | 0.047743 | 0.059018 | 0.067198 |
| 104.96 | 0.065324 | 0.077678 | 0.105821 | 0.113358 | 0.038417 | 0.047695 | 0.059367 | 0.067353 |
| 105.06 | 0.065060 | 0.077519 | 0.105994 | 0.113331 | 0.038171 | 0.047485 | 0.059324 | 0.067178 |
| 105.16 | 0.065069 | 0.077658 | 0.105427 | 0.113215 | 0.038176 | 0.047570 | 0.059006 | 0.067109 |
| 105.26 | 0.065578 | 0.077995 | 0.105224 | 0.113573 | 0.038475 | 0.047777 | 0.058893 | 0.067322 |
| 105.36 | 0.065512 | 0.077887 | 0.105852 | 0.113801 | 0.038345 | 0.047597 | 0.059104 | 0.067296 |
| 105.46 | 0.065109 | 0.077699 | 0.105630 | 0.113241 | 0.038109 | 0.047482 | 0.058979 | 0.066966 |
| 105.56 | 0.065144 | 0.077381 | 0.105265 | 0.112874 | 0.038109 | 0.047262 | 0.058743 | 0.066712 |
| 105.66 | 0.065169 | 0.077851 | 0.105464 | 0.113328 | 0.038123 | 0.047549 | 0.058855 | 0.066980 |
| 105.76 | 0.064951 | 0.077443 | 0.105064 | 0.113353 | 0.037996 | 0.047299 | 0.058631 | 0.066995 |
| 105.86 | 0.064968 | 0.077829 | 0.105403 | 0.112877 | 0.038006 | 0.047535 | 0.058820 | 0.066713 |
| 105.96 | 0.065069 | 0.077327 | 0.105357 | 0.113522 | 0.037974 | 0.047116 | 0.058654 | 0.066934 |
| 106.06 | 0.065276 | 0.077962 | 0.104950 | 0.113280 | 0.038094 | 0.047503 | 0.058428 | 0.066792 |
| 106.16 | 0.064796 | 0.077569 | 0.105376 | 0.112720 | 0.037902 | 0.047373 | 0.058801 | 0.066616 |
| 106.26 | 0.065045 | 0.077275 | 0.104680 | 0.112867 | 0.038048 | 0.047193 | 0.058412 | 0.066702 |
| 106.36 | 0.065154 | 0.077178 | 0.105118 | 0.113162 | 0.038021 | 0.047021 | 0.058516 | 0.066717 |
| 106.46 | 0.065166 | 0.077144 | 0.105129 | 0.112539 | 0.038028 | 0.047001 | 0.058523 | 0.066349 |
| 106.56 | 0.064894 | 0.077779 | 0.105287 | 0.113292 | 0.037869 | 0.047388 | 0.058610 | 0.066793 |
| 106.66 | 0.064883 | 0.077700 | 0.105453 | 0.113499 | 0.037862 | 0.047340 | 0.058703 | 0.066916 |
| 106.76 | 0.065142 | 0.077829 | 0.104969 | 0.113134 | 0.037922 | 0.047304 | 0.058294 | 0.066540 |
| 106.86 | 0.065197 | 0.077510 | 0.104708 | 0.112837 | 0.037954 | 0.047110 | 0.058149 | 0.066366 |
| 106.96 | 0.064894 | 0.077548 | 0.105081 | 0.112580 | 0.037866 | 0.047243 | 0.058491 | 0.066368 |
| 107.06 | 0.065142 | 0.077210 | 0.104734 | 0.112675 | 0.037922 | 0.046928 | 0.058163 | 0.066271 |
| 107.16 | 0.064883 | 0.077293 | 0.104370 | 0.113135 | 0.037768 | 0.046974 | 0.057956 | 0.066535 |
| 107.26 | 0.064678 | 0.077118 | 0.104401 | 0.113222 | 0.037649 | 0.046868 | 0.057973 | 0.066586 |
| 107.36 | 0.064594 | 0.077462 | 0.104656 | 0.112972 | 0.037600 | 0.047077 | 0.058115 | 0.066439 |
| 107.46 | 0.065017 | 0.077507 | 0.104495 | 0.113103 | 0.037755 | 0.046991 | 0.057886 | 0.066356 |
| 107.56 | 0.064813 | 0.077371 | 0.104816 | 0.112796 | 0.037724 | 0.047017 | 0.058198 | 0.066330 |
| 107.66 | 0.064867 | 0.076911 | 0.104831 | 0.112049 | 0.037756 | 0.046738 | 0.058207 | 0.065891 |
| 107.76 | 0.064626 | 0.077162 | 0.104309 | 0.112028 | 0.037525 | 0.046777 | 0.057777 | 0.065720 |
| 107.86 | 0.064447 | 0.077295 | 0.104346 | 0.112603 | 0.037421 | 0.046858 | 0.057797 | 0.066057 |
| 107.96 | 0.064806 | 0.077446 | 0.104901 | 0.112365 | 0.037629 | 0.046950 | 0.058105 | 0.065917 |
| 108.06 | 0.064974 | 0.077039 | 0.104578 | 0.112391 | 0.037639 | 0.046595 | 0.057792 | 0.065780 |
| 108.16 | 0.064801 | 0.077325 | 0.105022 | 0.112607 | 0.037448 | 0.046654 | 0.057897 | 0.065747 |
| 108.26 | 0.064912 | 0.077457 | 0.104496 | 0.112951 | 0.037512 | 0.046734 | 0.057607 | 0.065947 |
| 108.36 | 0.065131 | 0.077615 | 0.104462 | 0.112790 | 0.037639 | 0.046830 | 0.057588 | 0.065853 |
| 108.46 | 0.064838 | 0.077042 | 0.105242 | 0.113016 | 0.037469 | 0.046483 | 0.058018 | 0.065985 |
| 108.56 | 0.065145 | 0.077598 | 0.104796 | 0.112310 | 0.037647 | 0.046819 | 0.057772 | 0.065573 |
| 108.66 | 0.064818 | 0.077131 | 0.105037 | 0.112621 | 0.037458 | 0.046537 | 0.057905 | 0.065755 |
| 108.76 | 0.065054 | 0.077395 | 0.105206 | 0.112901 | 0.037594 | 0.046697 | 0.057998 | 0.065918 |
| 108.86 | 0.065078 | 0.077235 | 0.104597 | 0.112601 | 0.037517 | 0.046487 | 0.057522 | 0.065583 |
| 108.96 | 0.065114 | 0.077158 | 0.104640 | 0.112507 | 0.037538 | 0.046441 | 0.057546 | 0.065529 |
| 109.06 | 0.064718 | 0.077350 | 0.104515 | 0.113058 | 0.037400 | 0.046670 | 0.057617 | 0.066010 |
| 109.16 | 0.064867 | 0.077423 | 0.104444 | 0.112873 | 0.037395 | 0.046600 | 0.057438 | 0.065742 |
| 109.26 | 0.065013 | 0.077174 | 0.104729 | 0.112670 | 0.037571 | 0.046563 | 0.057735 | 0.065783 |
| 109.36 | 0.064793 | 0.077541 | 0.104881 | 0.112715 | 0.037352 | 0.046671 | 0.057679 | 0.065650 |
| 109.46 | 0.064991 | 0.076983 | 0.104810 | 0.112759 | 0.037467 | 0.046335 | 0.057640 | 0.065675 |
| 109.56 | 0.064860 | 0.077533 | 0.104678 | 0.113129 | 0.037391 | 0.046666 | 0.057567 | 0.065891 |
| 109.66 | 0.064809 | 0.077028 | 0.105207 | 0.113037 | 0.037362 | 0.046363 | 0.057858 | 0.065837 |
| 109.76 | 0.064827 | 0.077031 | 0.104376 | 0.113076 | 0.037372 | 0.046364 | 0.057401 | 0.065860 |
| 109.86 | 0.064842 | 0.077232 | 0.105077 | 0.112697 | 0.037381 | 0.046485 | 0.057786 | 0.065639 |
| 109.96 | 0.065034 | 0.077424 | 0.104868 | 0.112707 | 0.037491 | 0.046601 | 0.057671 | 0.065645 |
| 110.06 | 0.064804 | 0.077582 | 0.104711 | 0.112843 | 0.037359 | 0.046696 | 0.057585 | 0.065724 |
| 110.16 | 0.064754 | 0.077285 | 0.104684 | 0.112876 | 0.037330 | 0.046517 | 0.057571 | 0.065743 |
| 110.26 | 0.064760 | 0.077066 | 0.105218 | 0.112825 | 0.037333 | 0.046385 | 0.057864 | 0.065714 |
| 110.36 | 0.064674 | 0.077161 | 0.105121 | 0.113042 | 0.037284 | 0.046442 | 0.057811 | 0.065840 |
| 110.46 | 0.065055 | 0.077400 | 0.104834 | 0.113224 | 0.037394 | 0.046450 | 0.057484 | 0.065754 |
| 110.56 | 0.064901 | 0.077232 | 0.104460 | 0.112317 | 0.037392 | 0.046458 | 0.057413 | 0.065378 |
| 110.66 | 0.064846 | 0.077249 | 0.104365 | 0.112283 | 0.037361 | 0.046468 | 0.057360 | 0.065359 |
| 110.76 | 0.064747 | 0.077439 | 0.104755 | 0.112495 | 0.037303 | 0.046582 | 0.057575 | 0.065482 |
| 110.86 | 0.064920 | 0.076984 | 0.104661 | 0.112879 | 0.037403 | 0.046308 | 0.057523 | 0.065706 |
| 110.96 | 0.064885 | 0.077360 | 0.104507 | 0.112995 | 0.037383 | 0.046534 | 0.057439 | 0.065773 |
| 111.06 | 0.064957 | 0.077379 | 0.104968 | 0.112886 | 0.037424 | 0.046546 | 0.057692 | 0.065710 |
| 111.16 | 0.064957 | 0.077150 | 0.104718 | 0.112191 | 0.037425 | 0.046408 | 0.057555 | 0.065306 |
| 111.26 | 0.064471 | 0.077239 | 0.104108 | 0.112605 | 0.037231 | 0.046570 | 0.057353 | 0.065699 |
| 111.36 | 0.064733 | 0.076965 | 0.104749 | 0.112431 | 0.037382 | 0.046405 | 0.057706 | 0.065598 |
| 111.46 | 0.064451 | 0.076720 | 0.104595 | 0.111806 | 0.037219 | 0.046257 | 0.057621 | 0.065233 |
| 111.56 | 0.064835 | 0.076960 | 0.103960 | 0.112333 | 0.037350 | 0.046289 | 0.057131 | 0.065380 |
| 111.66 | 0.064328 | 0.076541 | 0.104194 | 0.112348 | 0.037144 | 0.046144 | 0.057394 | 0.065542 |
| 111.76 | 0.064373 | 0.076923 | 0.104018 | 0.111971 | 0.037170 | 0.046374 | 0.057296 | 0.065322 |
| 111.86 | 0.064521 | 0.076737 | 0.104084 | 0.112369 | 0.037256 | 0.046262 | 0.057333 | 0.065554 |
| 111.96 | 0.064571 | 0.076628 | 0.104053 | 0.112139 | 0.037285 | 0.046196 | 0.057316 | 0.065420 |
| 112.06 | 0.064330 | 0.076611 | 0.103736 | 0.112075 | 0.037146 | 0.046186 | 0.057141 | 0.065382 |
| 112.16 | 0.064454 | 0.076763 | 0.104197 | 0.111703 | 0.037305 | 0.046386 | 0.057529 | 0.065318 |
| 112.26 | 0.064170 | 0.076528 | 0.103998 | 0.111906 | 0.037049 | 0.046131 | 0.057280 | 0.065277 |
| 112.36 | 0.064396 | 0.076692 | 0.103943 | 0.111444 | 0.037180 | 0.046230 | 0.057249 | 0.065007 |
| 112.46 | 0.064410 | 0.076850 | 0.103652 | 0.111817 | 0.037188 | 0.046325 | 0.057089 | 0.065225 |
| 112.56 | 0.064287 | 0.076239 | 0.103157 | 0.110982 | 0.037222 | 0.046087 | 0.056976 | 0.064921 |
| 112.66 | 0.063904 | 0.076149 | 0.103424 | 0.111402 | 0.037000 | 0.046032 | 0.057124 | 0.065166 |
| 112.76 | 0.064038 | 0.076393 | 0.103150 | 0.111628 | 0.037077 | 0.046180 | 0.056972 | 0.065298 |
| 112.86 | 0.064382 | 0.076326 | 0.103319 | 0.111631 | 0.037277 | 0.046139 | 0.057066 | 0.065300 |
| 112.96 | 0.064188 | 0.076672 | 0.103271 | 0.111482 | 0.037073 | 0.046235 | 0.056899 | 0.065053 |
| 113.06 | 0.063829 | 0.075901 | 0.103336 | 0.111332 | 0.036953 | 0.045878 | 0.057069 | 0.065119 |
| 113.16 | 0.064172 | 0.075888 | 0.103289 | 0.110912 | 0.037151 | 0.045870 | 0.057043 | 0.064873 |
| 113.26 | 0.063929 | 0.076479 | 0.103496 | 0.111287 | 0.037010 | 0.046227 | 0.057158 | 0.065092 |
| 113.36 | 0.063822 | 0.076509 | 0.103740 | 0.111448 | 0.036862 | 0.046136 | 0.057158 | 0.065034 |
| 113.46 | 0.064037 | 0.076255 | 0.103098 | 0.111620 | 0.036986 | 0.045983 | 0.056804 | 0.065134 |
| 113.56 | 0.063663 | 0.076429 | 0.103768 | 0.111592 | 0.036766 | 0.046083 | 0.057167 | 0.065110 |
| 113.66 | 0.064035 | 0.076296 | 0.103159 | 0.111395 | 0.036981 | 0.046003 | 0.056831 | 0.064995 |
| 113.76 | 0.063680 | 0.075979 | 0.103626 | 0.111107 | 0.036775 | 0.045812 | 0.057089 | 0.064827 |
| 113.86 | 0.063879 | 0.075874 | 0.103548 | 0.111326 | 0.036891 | 0.045748 | 0.057046 | 0.064955 |
| 113.96 | 0.064044 | 0.076237 | 0.103243 | 0.110847 | 0.036986 | 0.045967 | 0.056878 | 0.064675 |
| 114.06 | 0.063983 | 0.075800 | 0.103375 | 0.110661 | 0.036947 | 0.045699 | 0.056945 | 0.064560 |
| 114.16 | 0.063795 | 0.076129 | 0.102854 | 0.110858 | 0.036838 | 0.045897 | 0.056657 | 0.064675 |
| 114.26 | 0.063744 | 0.076276 | 0.102754 | 0.110467 | 0.036808 | 0.045986 | 0.056603 | 0.064447 |
| 114.36 | 0.063496 | 0.075795 | 0.103275 | 0.110733 | 0.036752 | 0.045804 | 0.057024 | 0.064755 |
| 114.46 | 0.063439 | 0.076008 | 0.102484 | 0.111009 | 0.036719 | 0.045933 | 0.056587 | 0.064916 |
| 114.56 | 0.063765 | 0.075536 | 0.102415 | 0.110266 | 0.036816 | 0.045534 | 0.056409 | 0.064322 |
| 114.66 | 0.063721 | 0.076086 | 0.102501 | 0.110445 | 0.036791 | 0.045866 | 0.056456 | 0.064427 |
| 114.76 | 0.063376 | 0.075911 | 0.102502 | 0.110914 | 0.036592 | 0.045761 | 0.056457 | 0.064701 |
| 114.86 | 0.063487 | 0.076115 | 0.102639 | 0.110547 | 0.036565 | 0.045770 | 0.056393 | 0.064327 |
| 114.96 | 0.063427 | 0.075897 | 0.102780 | 0.110617 | 0.036531 | 0.045639 | 0.056470 | 0.064367 |
| 115.06 | 0.063691 | 0.076151 | 0.102663 | 0.110592 | 0.036683 | 0.045792 | 0.056406 | 0.064353 |
| 115.16 | 0.063638 | 0.076145 | 0.103106 | 0.110545 | 0.036652 | 0.045788 | 0.056649 | 0.064326 |
| 115.26 | 0.063679 | 0.075782 | 0.102758 | 0.110707 | 0.036763 | 0.045678 | 0.056592 | 0.064573 |
| 115.36 | 0.063637 | 0.075797 | 0.102173 | 0.109929 | 0.036629 | 0.045551 | 0.056103 | 0.063928 |
| 115.46 | 0.063319 | 0.075913 | 0.102896 | 0.110438 | 0.036446 | 0.045620 | 0.056499 | 0.064224 |
| 115.56 | 0.063560 | 0.075909 | 0.102904 | 0.110462 | 0.036585 | 0.045618 | 0.056504 | 0.064238 |
| 115.66 | 0.063605 | 0.075692 | 0.102419 | 0.109928 | 0.036611 | 0.045488 | 0.056237 | 0.063927 |
| 115.76 | 0.063322 | 0.075616 | 0.102405 | 0.110176 | 0.036448 | 0.045442 | 0.056230 | 0.064071 |
| 115.86 | 0.063599 | 0.075466 | 0.103012 | 0.110475 | 0.036608 | 0.045352 | 0.056563 | 0.064245 |
| 115.96 | 0.063217 | 0.075683 | 0.102205 | 0.110334 | 0.036388 | 0.045483 | 0.056120 | 0.064163 |
| 116.06 | 0.063483 | 0.075635 | 0.101978 | 0.110184 | 0.036536 | 0.045448 | 0.055989 | 0.064069 |
| 116.16 | 0.063430 | 0.075982 | 0.102576 | 0.109947 | 0.036419 | 0.045549 | 0.056183 | 0.063779 |
| 116.26 | 0.063422 | 0.075160 | 0.102444 | 0.110307 | 0.036410 | 0.045050 | 0.056104 | 0.063980 |
| 116.36 | 0.063290 | 0.075246 | 0.102597 | 0.110229 | 0.036334 | 0.045102 | 0.056188 | 0.063935 |
| 116.46 | 0.063579 | 0.075717 | 0.102621 | 0.109902 | 0.036500 | 0.045384 | 0.056201 | 0.063745 |
| 116.56 | 0.063307 | 0.075343 | 0.102582 | 0.109894 | 0.036344 | 0.045160 | 0.056180 | 0.063740 |
| 116.66 | 0.063390 | 0.075765 | 0.102676 | 0.110580 | 0.036392 | 0.045412 | 0.056231 | 0.064138 |
| 116.76 | 0.063771 | 0.075503 | 0.102323 | 0.110563 | 0.036524 | 0.045148 | 0.055905 | 0.063977 |
| 116.86 | 0.063493 | 0.075462 | 0.102060 | 0.109741 | 0.036359 | 0.045118 | 0.055754 | 0.063493 |
| 116.96 | 0.063470 | 0.075640 | 0.102690 | 0.110785 | 0.036351 | 0.045230 | 0.056105 | 0.064105 |
| 117.06 | 0.063214 | 0.075516 | 0.102367 | 0.109944 | 0.036114 | 0.045043 | 0.055789 | 0.063459 |
| 117.16 | 0.063690 | 0.075494 | 0.102287 | 0.109945 | 0.036386 | 0.045030 | 0.055745 | 0.063460 |
| 117.26 | 0.063529 | 0.075371 | 0.101962 | 0.110497 | 0.036380 | 0.045063 | 0.055700 | 0.063930 |
| 117.36 | 0.063606 | 0.075441 | 0.102318 | 0.110691 | 0.036338 | 0.044999 | 0.055762 | 0.063891 |
| 117.46 | 0.063521 | 0.075199 | 0.102309 | 0.109794 | 0.036376 | 0.044961 | 0.055890 | 0.063523 |
| 117.56 | 0.063592 | 0.075811 | 0.102506 | 0.109984 | 0.036330 | 0.045219 | 0.055865 | 0.063482 |
| 117.66 | 0.063448 | 0.075472 | 0.102342 | 0.110178 | 0.036248 | 0.045017 | 0.055775 | 0.063594 |
| 117.76 | 0.063356 | 0.075666 | 0.102962 | 0.110332 | 0.036195 | 0.045133 | 0.056114 | 0.063683 |
| 117.86 | 0.063245 | 0.075677 | 0.102651 | 0.110648 | 0.036132 | 0.045139 | 0.055944 | 0.063866 |
| 117.96 | 0.063315 | 0.075882 | 0.102210 | 0.110427 | 0.036172 | 0.045261 | 0.055704 | 0.063738 |
| 118.06 | 0.063248 | 0.075427 | 0.102722 | 0.110047 | 0.036043 | 0.044877 | 0.055842 | 0.063360 |
| 118.16 | 0.063260 | 0.075325 | 0.103033 | 0.110291 | 0.036050 | 0.044816 | 0.056011 | 0.063500 |
| 118.26 | 0.063229 | 0.075769 | 0.102560 | 0.110406 | 0.036032 | 0.045081 | 0.055754 | 0.063566 |
| 118.36 | 0.063395 | 0.076157 | 0.102590 | 0.110473 | 0.036041 | 0.045204 | 0.055639 | 0.063454 |
| 118.46 | 0.063247 | 0.075344 | 0.102392 | 0.110563 | 0.035952 | 0.044715 | 0.055523 | 0.063496 |
| 118.56 | 0.063398 | 0.075523 | 0.102402 | 0.110628 | 0.035953 | 0.044715 | 0.055397 | 0.063384 |
| 118.66 | 0.063550 | 0.075817 | 0.102426 | 0.110766 | 0.036124 | 0.044996 | 0.055542 | 0.063613 |
| 118.76 | 0.063458 | 0.076024 | 0.102626 | 0.110301 | 0.035986 | 0.045012 | 0.055518 | 0.063196 |
| 118.86 | 0.063429 | 0.075738 | 0.102337 | 0.110633 | 0.035964 | 0.044836 | 0.055353 | 0.063376 |
| 118.96 | 0.063921 | 0.075623 | 0.102522 | 0.110734 | 0.036157 | 0.044662 | 0.055322 | 0.063284 |
| 119.06 | 0.063830 | 0.076159 | 0.102632 | 0.110711 | 0.036106 | 0.044978 | 0.055382 | 0.063271 |
| 119.16 | 0.063655 | 0.075498 | 0.103288 | 0.110961 | 0.036007 | 0.044588 | 0.055735 | 0.063414 |
| 119.26 | 0.063871 | 0.075829 | 0.103249 | 0.110976 | 0.036129 | 0.044783 | 0.055715 | 0.063423 |
| 119.36 | 0.063510 | 0.076025 | 0.102492 | 0.110507 | 0.035925 | 0.044899 | 0.055306 | 0.063155 |
| 119.46 | 0.063763 | 0.075709 | 0.102888 | 0.111009 | 0.036068 | 0.044713 | 0.055520 | 0.063441 |
| 119.56 | 0.063540 | 0.075765 | 0.103275 | 0.110750 | 0.035942 | 0.044745 | 0.055729 | 0.063293 |
| 119.66 | 0.063393 | 0.075572 | 0.103026 | 0.110346 | 0.035859 | 0.044632 | 0.055594 | 0.063063 |
| 119.76 | 0.063651 | 0.075787 | 0.102801 | 0.110936 | 0.035914 | 0.044645 | 0.055333 | 0.063240 |
| 119.86 | 0.063633 | 0.075812 | 0.103182 | 0.111005 | 0.035995 | 0.044773 | 0.055678 | 0.063439 |
| 119.96 | 0.063372 | 0.076088 | 0.102909 | 0.110268 | 0.035847 | 0.044936 | 0.055531 | 0.063018 |
| 120.06 | 0.063902 | 0.075712 | 0.103118 | 0.110690 | 0.036055 | 0.044601 | 0.055503 | 0.063099 |
| 120.16 | 0.063581 | 0.075919 | 0.102592 | 0.110460 | 0.036050 | 0.044943 | 0.055491 | 0.063277 |
| 120.26 | 0.063378 | 0.075643 | 0.102382 | 0.110191 | 0.035935 | 0.044779 | 0.055377 | 0.063124 |
| 120.36 | 0.063309 | 0.075829 | 0.102929 | 0.110352 | 0.035806 | 0.044776 | 0.055533 | 0.063056 |
| 120.46 | 0.063731 | 0.075891 | 0.102522 | 0.110259 | 0.036045 | 0.044813 | 0.055313 | 0.063003 |
| 120.56 | 0.063260 | 0.075653 | 0.102256 | 0.110243 | 0.035778 | 0.044672 | 0.055170 | 0.062993 |
| 120.66 | 0.063524 | 0.075567 | 0.102863 | 0.110582 | 0.035927 | 0.044621 | 0.055497 | 0.063187 |
| 120.76 | 0.063612 | 0.075929 | 0.102706 | 0.110463 | 0.035892 | 0.044729 | 0.055281 | 0.062970 |
| 120.86 | 0.063813 | 0.075793 | 0.102695 | 0.110826 | 0.036005 | 0.044649 | 0.055276 | 0.063177 |
| 120.96 | 0.063577 | 0.075721 | 0.102388 | 0.111097 | 0.035872 | 0.044607 | 0.055110 | 0.063332 |
| 121.06 | 0.063839 | 0.076102 | 0.102567 | 0.110501 | 0.035911 | 0.044695 | 0.055039 | 0.062800 |
| 121.16 | 0.063388 | 0.075762 | 0.102922 | 0.110814 | 0.035657 | 0.044495 | 0.055229 | 0.062978 |
| 121.26 | 0.063657 | 0.075947 | 0.102411 | 0.110834 | 0.035808 | 0.044604 | 0.054955 | 0.062989 |
| 121.36 | 0.063514 | 0.075725 | 0.102383 | 0.111088 | 0.035728 | 0.044473 | 0.054940 | 0.063134 |
| 121.46 | 0.063550 | 0.075509 | 0.102683 | 0.110401 | 0.035748 | 0.044347 | 0.055101 | 0.062743 |
| 121.56 | 0.063610 | 0.075880 | 0.102616 | 0.110131 | 0.035781 | 0.044565 | 0.055065 | 0.062590 |
| 121.66 | 0.063678 | 0.075652 | 0.102579 | 0.111076 | 0.035820 | 0.044430 | 0.055045 | 0.063127 |
| 121.76 | 0.063730 | 0.075818 | 0.102724 | 0.110160 | 0.035758 | 0.044415 | 0.054983 | 0.062447 |
| 121.86 | 0.063618 | 0.075814 | 0.102740 | 0.110241 | 0.035695 | 0.044412 | 0.054991 | 0.062493 |
| 121.96 | 0.063514 | 0.075782 | 0.103148 | 0.110128 | 0.035728 | 0.044507 | 0.055351 | 0.062588 |
| 122.06 | 0.063861 | 0.076018 | 0.102750 | 0.110953 | 0.035923 | 0.044646 | 0.055137 | 0.063057 |
| 122.16 | 0.063569 | 0.076103 | 0.103183 | 0.110472 | 0.035758 | 0.044696 | 0.055369 | 0.062783 |
| 122.26 | 0.063550 | 0.076018 | 0.103252 | 0.110647 | 0.035748 | 0.044645 | 0.055406 | 0.062883 |
| 122.36 | 0.063894 | 0.075909 | 0.102527 | 0.111090 | 0.035942 | 0.044581 | 0.055017 | 0.063135 |
| 122.46 | 0.063798 | 0.076160 | 0.102869 | 0.110975 | 0.035887 | 0.044729 | 0.055201 | 0.063069 |
| 122.56 | 0.063605 | 0.076061 | 0.103211 | 0.110189 | 0.035779 | 0.044670 | 0.055384 | 0.062623 |
| 122.66 | 0.063919 | 0.075929 | 0.103005 | 0.110534 | 0.035864 | 0.044480 | 0.055133 | 0.062659 |
| 122.76 | 0.063515 | 0.076079 | 0.103186 | 0.110368 | 0.035728 | 0.044681 | 0.055371 | 0.062724 |
| 122.86 | 0.063731 | 0.076166 | 0.103089 | 0.110657 | 0.035850 | 0.044733 | 0.055319 | 0.062889 |
| 122.96 | 0.063307 | 0.075421 | 0.102127 | 0.110012 | 0.035695 | 0.044400 | 0.054933 | 0.062670 |
| 123.06 | 0.063471 | 0.075876 | 0.102627 | 0.110320 | 0.035788 | 0.044668 | 0.055202 | 0.062846 |
| 123.16 | 0.063508 | 0.075388 | 0.102826 | 0.110376 | 0.035809 | 0.044380 | 0.055309 | 0.062878 |
| 123.26 | 0.063492 | 0.075689 | 0.102602 | 0.110164 | 0.035800 | 0.044558 | 0.055188 | 0.062757 |
| 123.36 | 0.063382 | 0.075381 | 0.102752 | 0.110080 | 0.035738 | 0.044376 | 0.055269 | 0.062709 |
| 123.46 | 0.063497 | 0.075705 | 0.102437 | 0.109902 | 0.035712 | 0.044454 | 0.054959 | 0.062449 |
| 123.56 | 0.063451 | 0.075528 | 0.102896 | 0.110091 | 0.035686 | 0.044350 | 0.055206 | 0.062556 |
| 123.66 | 0.063411 | 0.075653 | 0.102466 | 0.110017 | 0.035663 | 0.044423 | 0.054975 | 0.062514 |
| 123.76 | 0.063381 | 0.075437 | 0.102644 | 0.110355 | 0.035646 | 0.044297 | 0.055070 | 0.062706 |
| 123.86 | 0.063480 | 0.075364 | 0.102529 | 0.110739 | 0.035611 | 0.044141 | 0.054869 | 0.062764 |
| 123.96 | 0.063479 | 0.075675 | 0.102677 | 0.110551 | 0.035611 | 0.044323 | 0.054948 | 0.062658 |
| 124.06 | 0.063355 | 0.075547 | 0.102564 | 0.110189 | 0.035541 | 0.044248 | 0.054888 | 0.062452 |
| 124.16 | 0.063800 | 0.076026 | 0.102384 | 0.110469 | 0.035706 | 0.044423 | 0.054662 | 0.062463 |
| 124.26 | 0.063669 | 0.075533 | 0.102507 | 0.109865 | 0.035717 | 0.044240 | 0.054857 | 0.062269 |
| 124.36 | 0.063284 | 0.075454 | 0.102872 | 0.110792 | 0.035501 | 0.044194 | 0.055052 | 0.062794 |
| 124.46 | 0.063619 | 0.075521 | 0.102479 | 0.109993 | 0.035690 | 0.044233 | 0.054842 | 0.062341 |
| 124.56 | 0.063299 | 0.075716 | 0.103011 | 0.109953 | 0.035510 | 0.044347 | 0.055127 | 0.062319 |
| 124.66 | 0.063686 | 0.075949 | 0.102840 | 0.110393 | 0.035727 | 0.044484 | 0.055035 | 0.062568 |
| 124.76 | 0.063578 | 0.075885 | 0.102288 | 0.109916 | 0.035667 | 0.044446 | 0.054739 | 0.062298 |
| 124.86 | 0.063439 | 0.075546 | 0.102550 | 0.110148 | 0.035588 | 0.044248 | 0.054880 | 0.062429 |
| 124.96 | 0.063338 | 0.075371 | 0.102911 | 0.109958 | 0.035532 | 0.044145 | 0.055073 | 0.062321 |
| 125.06 | 0.063261 | 0.075666 | 0.103034 | 0.110409 | 0.035488 | 0.044318 | 0.055139 | 0.062577 |
| 125.16 | 0.063258 | 0.075637 | 0.102361 | 0.109947 | 0.035487 | 0.044301 | 0.054779 | 0.062315 |
| 125.26 | 0.063424 | 0.075314 | 0.102604 | 0.109780 | 0.035665 | 0.044216 | 0.055039 | 0.062369 |
| 125.36 | 0.063130 | 0.075469 | 0.102205 | 0.110192 | 0.035408 | 0.044194 | 0.054685 | 0.062442 |
| 125.46 | 0.063356 | 0.075427 | 0.102044 | 0.110084 | 0.035535 | 0.044169 | 0.054599 | 0.062382 |
| 125.56 | 0.063380 | 0.075756 | 0.102413 | 0.110401 | 0.035640 | 0.044476 | 0.054937 | 0.062721 |
| 125.66 | 0.063331 | 0.075537 | 0.102700 | 0.110225 | 0.035521 | 0.044234 | 0.054950 | 0.062461 |
| 125.76 | 0.063495 | 0.075530 | 0.102675 | 0.110306 | 0.035613 | 0.044230 | 0.054937 | 0.062507 |
| 125.86 | 0.063538 | 0.075501 | 0.102480 | 0.110107 | 0.035637 | 0.044213 | 0.054832 | 0.062394 |
| 125.96 | 0.063379 | 0.075136 | 0.102774 | 0.109747 | 0.035548 | 0.043999 | 0.054990 | 0.062190 |
| 126.06 | 0.063114 | 0.075214 | 0.102516 | 0.109574 | 0.035484 | 0.044150 | 0.054982 | 0.062240 |
| 126.16 | 0.063308 | 0.075427 | 0.102350 | 0.110374 | 0.035508 | 0.044169 | 0.054763 | 0.062546 |
| 126.26 | 0.063174 | 0.075581 | 0.102799 | 0.110234 | 0.035433 | 0.044260 | 0.055003 | 0.062466 |
| 126.36 | 0.063541 | 0.075799 | 0.102289 | 0.109990 | 0.035548 | 0.044274 | 0.054590 | 0.062169 |
| 126.46 | 0.063108 | 0.075714 | 0.102354 | 0.110142 | 0.035306 | 0.044224 | 0.054625 | 0.062254 |
| 126.56 | 0.063082 | 0.075442 | 0.102118 | 0.109926 | 0.035375 | 0.044170 | 0.054629 | 0.062280 |
| 126.66 | 0.063453 | 0.075265 | 0.101727 | 0.109397 | 0.035583 | 0.044067 | 0.054420 | 0.061981 |
| 126.76 | 0.063246 | 0.075207 | 0.102287 | 0.110217 | 0.035467 | 0.044033 | 0.054719 | 0.062445 |
| 126.86 | 0.063463 | 0.075476 | 0.102085 | 0.109868 | 0.035589 | 0.044190 | 0.054611 | 0.062248 |
| 126.96 | 0.063432 | 0.075439 | 0.101960 | 0.110231 | 0.035572 | 0.044168 | 0.054544 | 0.062453 |
| 127.06 | 0.063375 | 0.075531 | 0.101882 | 0.109895 | 0.035540 | 0.044223 | 0.054503 | 0.062263 |
| 127.16 | 0.063413 | 0.075257 | 0.102016 | 0.110041 | 0.035561 | 0.044062 | 0.054574 | 0.062346 |
| 127.26 | 0.063123 | 0.075027 | 0.101647 | 0.109919 | 0.035392 | 0.043919 | 0.054367 | 0.062265 |
| 127.36 | 0.062991 | 0.074837 | 0.101408 | 0.109446 | 0.035408 | 0.043921 | 0.054378 | 0.062156 |
| 127.46 | 0.062985 | 0.075139 | 0.101575 | 0.109748 | 0.035405 | 0.044098 | 0.054468 | 0.062328 |
| 127.56 | 0.062880 | 0.075299 | 0.101611 | 0.109742 | 0.035346 | 0.044192 | 0.054487 | 0.062325 |
| 127.66 | 0.062962 | 0.075188 | 0.102010 | 0.109531 | 0.035301 | 0.044014 | 0.054561 | 0.062045 |
| 127.76 | 0.063234 | 0.075423 | 0.101807 | 0.110039 | 0.035454 | 0.044151 | 0.054452 | 0.062333 |
| 127.86 | 0.062856 | 0.075330 | 0.101717 | 0.109638 | 0.035242 | 0.044096 | 0.054404 | 0.062106 |
| 127.96 | 0.063160 | 0.075097 | 0.101721 | 0.109465 | 0.035413 | 0.043960 | 0.054406 | 0.062008 |
| 128.06 | 0.062835 | 0.075373 | 0.101894 | 0.109801 | 0.035139 | 0.044008 | 0.054359 | 0.062038 |
| 128.16 | 0.062980 | 0.074784 | 0.102223 | 0.109120 | 0.035221 | 0.043664 | 0.054534 | 0.061653 |
| 128.26 | 0.063287 | 0.074830 | 0.101875 | 0.109663 | 0.035392 | 0.043691 | 0.054349 | 0.061960 |
| 128.36 | 0.063231 | 0.075414 | 0.102278 | 0.109298 | 0.035361 | 0.044032 | 0.054563 | 0.061754 |
| 128.46 | 0.063188 | 0.075136 | 0.101643 | 0.109721 | 0.035337 | 0.043870 | 0.054225 | 0.061993 |
| 128.56 | 0.063029 | 0.074929 | 0.101883 | 0.109575 | 0.035248 | 0.043749 | 0.054353 | 0.061910 |
| 128.66 | 0.063114 | 0.075196 | 0.101997 | 0.109693 | 0.035296 | 0.043905 | 0.054414 | 0.061977 |
| 128.76 | 0.063278 | 0.074919 | 0.101591 | 0.109939 | 0.035387 | 0.043743 | 0.054197 | 0.062116 |
| 128.86 | 0.063163 | 0.074993 | 0.101904 | 0.109168 | 0.035323 | 0.043787 | 0.054364 | 0.061681 |
| 128.96 | 0.063100 | 0.075129 | 0.101888 | 0.109855 | 0.035288 | 0.043866 | 0.054355 | 0.062069 |
| 129.06 | 0.063057 | 0.075377 | 0.102181 | 0.109968 | 0.035172 | 0.043897 | 0.054371 | 0.061972 |
| 129.16 | 0.062845 | 0.075063 | 0.101719 | 0.109933 | 0.035054 | 0.043714 | 0.054125 | 0.061952 |
| 129.26 | 0.063160 | 0.075280 | 0.102085 | 0.109746 | 0.035230 | 0.043841 | 0.054320 | 0.061847 |
| 129.36 | 0.063119 | 0.075268 | 0.101972 | 0.109777 | 0.035207 | 0.043833 | 0.054260 | 0.061865 |
| 129.46 | 0.063150 | 0.075525 | 0.102190 | 0.109650 | 0.035141 | 0.043878 | 0.054246 | 0.061646 |
| 129.56 | 0.063404 | 0.075299 | 0.102218 | 0.109581 | 0.035282 | 0.043747 | 0.054261 | 0.061607 |
| 129.66 | 0.063040 | 0.074897 | 0.101754 | 0.109202 | 0.035163 | 0.043617 | 0.054144 | 0.061541 |
| 129.76 | 0.063276 | 0.075324 | 0.101775 | 0.109805 | 0.035295 | 0.043866 | 0.054155 | 0.061880 |
| 129.86 | 0.063040 | 0.075478 | 0.102163 | 0.109423 | 0.035079 | 0.043851 | 0.054232 | 0.061518 |
| 129.96 | 0.062912 | 0.075568 | 0.102134 | 0.109651 | 0.035008 | 0.043904 | 0.054216 | 0.061646 |
| 130.06 | 0.062918 | 0.075059 | 0.102244 | 0.109909 | 0.035095 | 0.043712 | 0.054404 | 0.061939 |
| 130.16 | 0.062994 | 0.075049 | 0.101607 | 0.109255 | 0.035138 | 0.043706 | 0.054066 | 0.061570 |
| 130.26 | 0.063277 | 0.075267 | 0.101711 | 0.109078 | 0.035295 | 0.043833 | 0.054121 | 0.061471 |
| 130.36 | 0.063314 | 0.074895 | 0.101627 | 0.109166 | 0.035316 | 0.043616 | 0.054076 | 0.061520 |
| 130.46 | 0.063319 | 0.075008 | 0.101919 | 0.109839 | 0.035319 | 0.043682 | 0.054232 | 0.061899 |
| 130.56 | 0.063189 | 0.074817 | 0.102206 | 0.109253 | 0.035246 | 0.043571 | 0.054384 | 0.061569 |
| 130.66 | 0.062777 | 0.075353 | 0.102184 | 0.109360 | 0.035016 | 0.043883 | 0.054373 | 0.061630 |
| 130.76 | 0.062914 | 0.074826 | 0.102007 | 0.109197 | 0.035093 | 0.043576 | 0.054278 | 0.061537 |
| 130.86 | 0.062782 | 0.075179 | 0.101438 | 0.109761 | 0.035019 | 0.043782 | 0.053976 | 0.061855 |
| 130.96 | 0.063126 | 0.075208 | 0.102270 | 0.109311 | 0.035120 | 0.043685 | 0.054278 | 0.061442 |
| 131.06 | 0.063122 | 0.075309 | 0.101826 | 0.109828 | 0.035118 | 0.043744 | 0.054042 | 0.061733 |
| 131.16 | 0.063300 | 0.075319 | 0.102001 | 0.109828 | 0.035217 | 0.043750 | 0.054135 | 0.061733 |
| 131.26 | 0.062815 | 0.075197 | 0.102030 | 0.109256 | 0.034947 | 0.043679 | 0.054150 | 0.061412 |
| 131.36 | 0.062871 | 0.074999 | 0.101748 | 0.109388 | 0.035069 | 0.043677 | 0.054141 | 0.061645 |
| 131.46 | 0.062852 | 0.075232 | 0.101543 | 0.109808 | 0.034968 | 0.043699 | 0.053892 | 0.061722 |
| 131.56 | 0.062964 | 0.075025 | 0.101710 | 0.109370 | 0.035030 | 0.043579 | 0.053980 | 0.061476 |
| 131.66 | 0.062655 | 0.075205 | 0.101960 | 0.109531 | 0.034958 | 0.043809 | 0.054268 | 0.061743 |
| 131.76 | 0.062873 | 0.074801 | 0.101304 | 0.109648 | 0.035080 | 0.043574 | 0.053919 | 0.061809 |
| 131.86 | 0.063137 | 0.075002 | 0.101283 | 0.109613 | 0.035227 | 0.043691 | 0.053908 | 0.061789 |
| 131.96 | 0.062907 | 0.075179 | 0.101276 | 0.109374 | 0.035099 | 0.043794 | 0.053905 | 0.061654 |
| 132.06 | 0.063071 | 0.074855 | 0.101255 | 0.108847 | 0.035190 | 0.043605 | 0.053893 | 0.061357 |
[truncated: 17,820 more chars]
